# Supplementary material
Source: MDPI journal article supplement (https://www.mdpi.com/1999-4907/13/6/946)
Supplement: s1 [file s1]

Transitions and Transversions

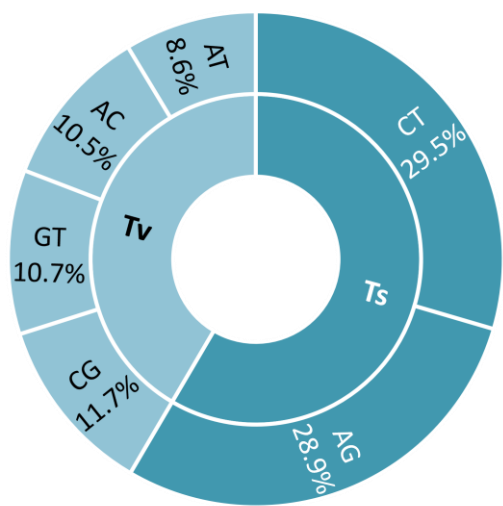

**Supplementary Figure S1. Type of SNPs identified in *P. pinaster* RNA-seq analysis.** Ts – transitions; Tv – transversions.

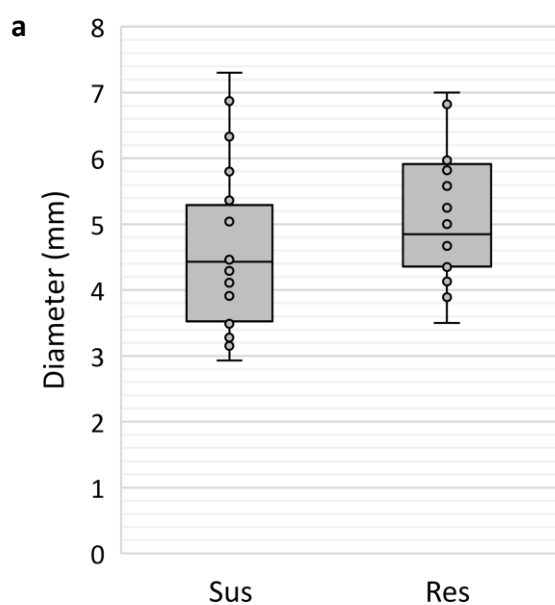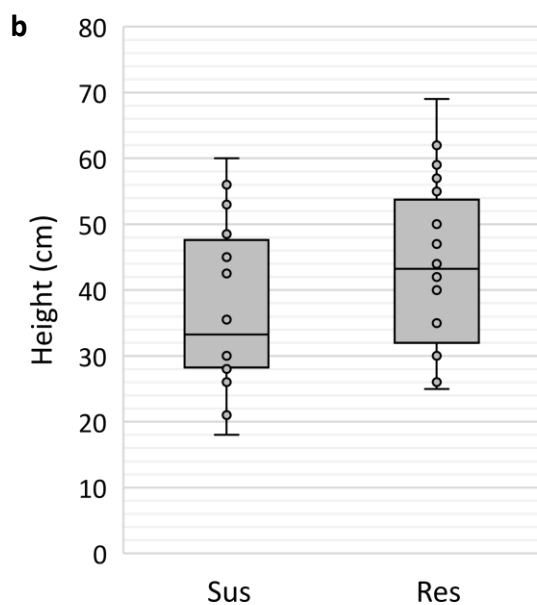

**c**

|             | <i>N</i> | Mean (mm) | SD   | <i>p</i> -value |
|-------------|----------|-----------|------|-----------------|
| Susceptible | 20       | 4.59      | 1.20 | 0.13            |
| Resistant   | 20       | 5.16      | 1.01 |                 |

**d**

|             | <i>N</i> | Mean (cm) | SD   | <i>p</i> -value |
|-------------|----------|-----------|------|-----------------|
| Susceptible | 20       | 37.3      | 12.4 | 0.11            |
| Resistant   | 20       | 43.9      | 12.4 |                 |

**Supplementary Figure S2. Boxplots of the height and diameter at the base of the stem of inoculated plants (half-sib family 440) and *t*-test results for the comparison of these parameters' means between susceptible and resistant plants.** (a) Boxplot of diameter at the base of the stem and (b) of height. Both measurements were made before inoculations. (c) Results of the two-sample unpaired *t*-test between the mean diameter of susceptible and resistant plants. (d) Results of the two-sample unpaired *t*-test between the mean height of susceptible and resistant plants. *N*, number of plants; SD, standard deviation.

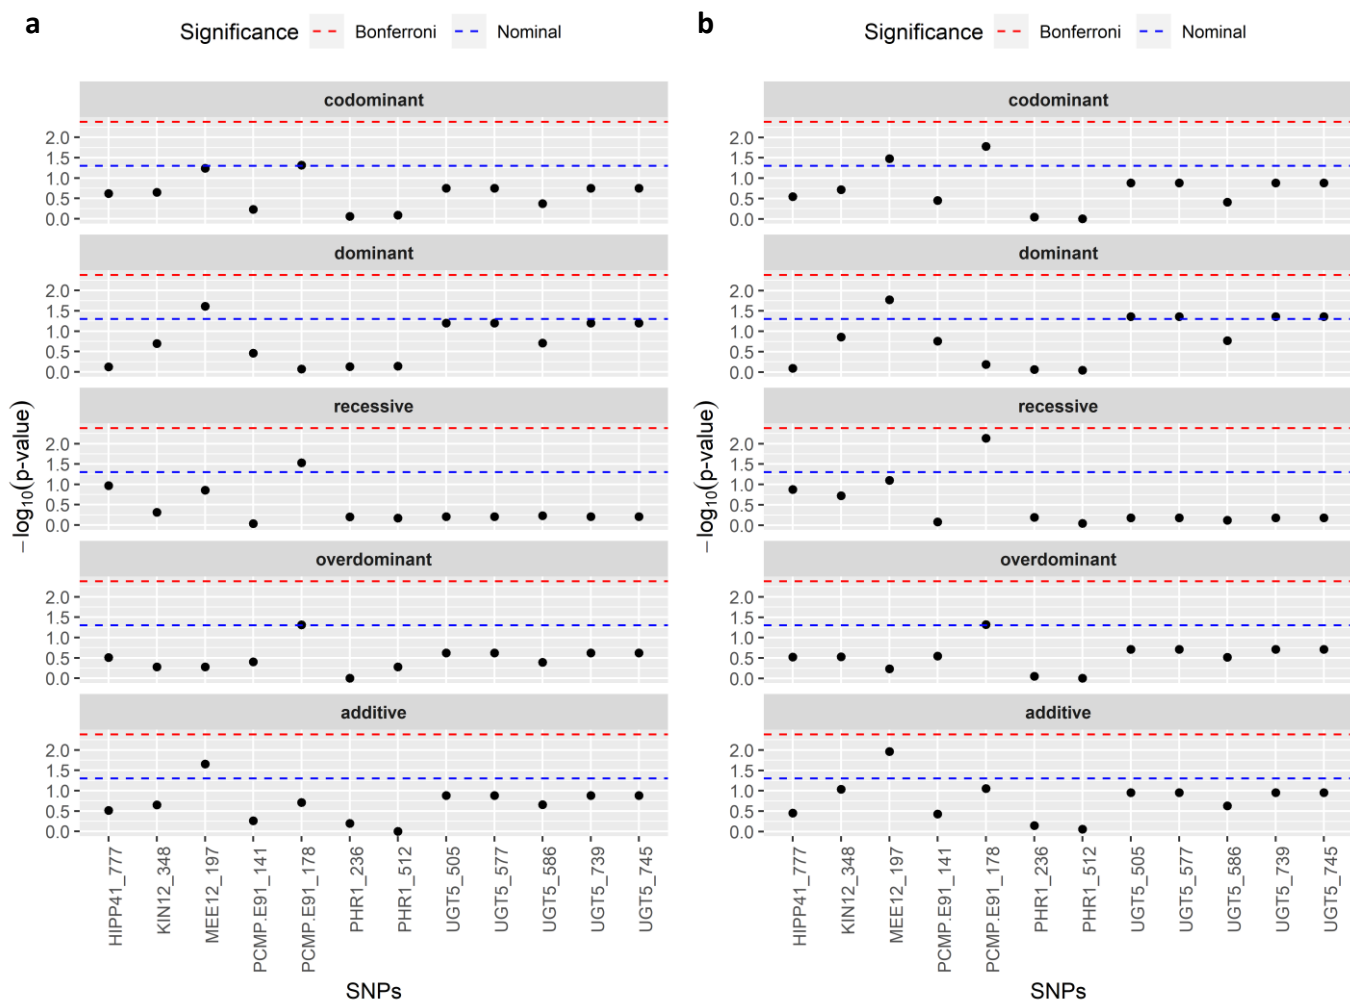

**Supplementary Figure S3. Association analysis of the SNPs in the six sequenced gene fragments under different genetic models with resistance to PWN.** All analyses were performed with SNPAssoc using a logistic regression model (a) or a logistic regression model adjusted for diameter at the basis of the stem and plant height (b).

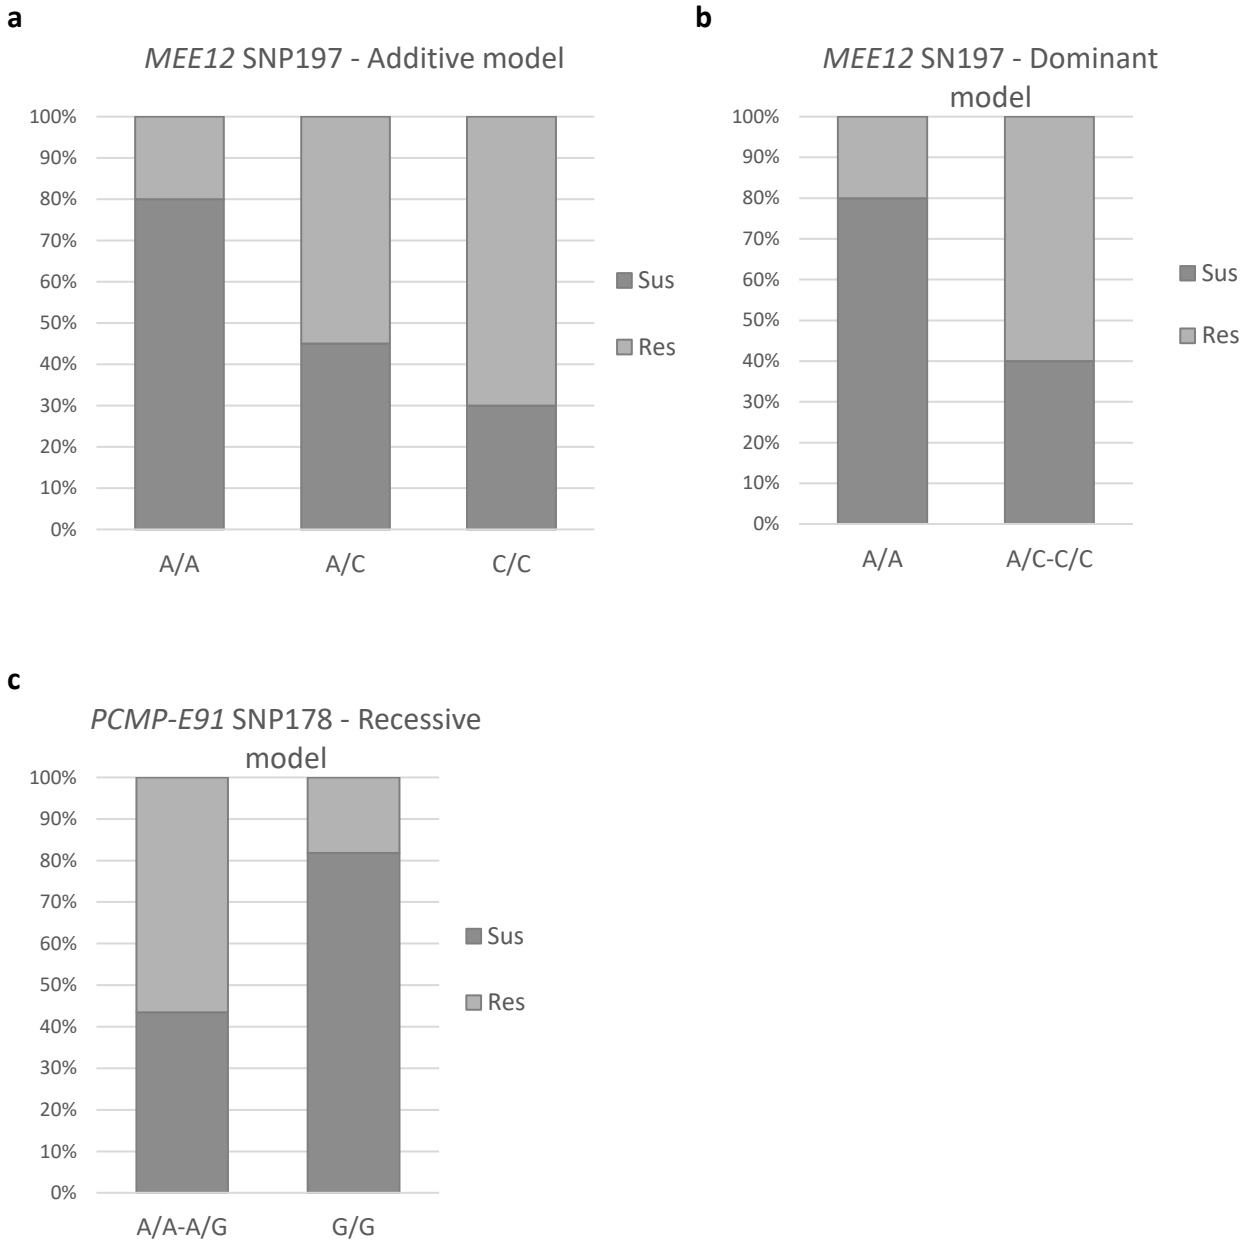

**Supplementary Figure S4. Genotypes distribution for SNPs associated with phenotype.** (a) *MEE12* SNP 197 genotypes distribution following the additive genetic model and (b) following the dominant genetic model. (c) *PCMP-E91* SNP 178 genotypes distribution following the recessive genetic model. Susceptible (Sus) plants are represented in dark grey, while resistant (Res) plant are in light grey.
