# Supplementary material
Source: MDPI journal article supplement (https://www.mdpi.com/1999-4907/13/6/946)
Supplement: s1 [file s1 › Supplementary Tables.xlsx]

## Sheet: Supplementary Table S1
Supplementary Table S1. Summary of PCR conditions and sequencing results of the 26 SNPs selected for validation. Sequenced - information about the success of amplification and sequencing of the samples for validation; Genotyped - information about which genes were later genotyped for 40 additional samples.
Transcript	SNP position	blastx annotation	Gene abreviation	Primer Forward	Primer Reversee	Ta (°C)	Sequenced	Genotyped
isotig09645	590, 620	Guanine nucleotide-binding protein, beta subunit [Parasponia andersonii]	GB1	ACTTGTTGGATCAATGTCTAGG	TGAACTCTGATTCGCTCTC	65	Yes	No
isotig30230	197	TATA box-binding protein-associated factor RNA polymerase I subunit B isoform X1 [Nelumbo nucifera]	MEE12	CCCTCAGTCCAATTCAACC	TCATCAGAGTCGGCATCC	64	Yes	Yes
isotig35427	767	probable disease resistance protein At4g27220 [Selaginella moellendorffii]	R-1	CGGAGCATTTCCTTTATTGG	ATAAGTCCAACTCTTCATGGTG	-	No	No
isotig36734	838	uncharacterized protein LOC105634929 [Jatropha curcas]	istg36734	CAGCCAATACCCAAACTCCA	CATCCTTACCTTCCACGCT	-	No	No
isotig37698	586	UDP-glycosyltransferase UGT5 [Picea glauca]	UGT5	TTCTCCAAGAGCTTTGATACCA	GCTGTCCTGTGAAGATAAGTG	64	Yes	Yes
isotig42428	236	protein PHOSPHATE STARVATION RESPONSE 1 [Quercus suber]	PHR1	AACCGGCTTACATATTCTG	TGTCAAGGCTTCTGAGTG	60	Yes	Yes
isotig42988	1078		istg42988	ATCATCAAACACGGTTCCA	GTCTCTTACACATGCTCCA	-	No	No
isotig45199	39	peroxidase 31 [Amborella trichopoda]	PER31	GATTATCCCATACTCTTCCCTC	GTTCCCTGCTACTCTCCA	-	No	No
isotig46969	1304	hypothetical protein PHAVU_003G104100g [Phaseolus vulgaris]	HP	GACCATCTTACAACCAACCC	AGTTCCCTTCAAAGCAGTC	66	Yes	No
isotig53013	453	pentatricopeptide repeat-containing protein At4g21065-like [Elaeis guineensis]	PCMP-H28	GATAAATCACACCCTCAATCTG	GACCTATTCACCAGTAATCC	51	Yes	No
isotig59117	872, 913	unknown [Picea sitchensis]	-	-	-	-	-	-
isotig67703	386	pentatricopeptide repeat-containing protein At2g27610 [Quercus suber]	PCMP	ACTTGGCTGTTGAAACTCC	AAATTGTGGTGAGGGATGGT	66	Yes	No
isotig121393	98		istg121393	AAATCAGCAGGTGGTCAGG	CAGTACACTAGTCTCCAGCCC	-	No	No
unigene161	348	kinesin-like protein KIN-12F isoform X1 [Nelumbo nucifera]	KIN12F	AACGGAGATTTGATTCAGGT	GTGGAATAACAGCTATCTTTGG	62	Yes	Yes
unigene340	1332	chromatin structure-remodeling complex protein SYD-like isoform X1 [Phoenix dactylifera]	SYD	GACAAAGGCGAATCCGAG	CTGAACCATCCGAAGATATCCT	-	No	No
unigene8832	646	heavy metal-associated isoprenylated plant protein 41-like [Elaeis guineensis]	HIPP41	GCATTACTCCAACTTCCATCAG	GCTTGTTTCACTAACTCCCA	64	Yes	Yes
unigene15220	508	Picea sitchensis clone WS0451_G20 unknown mRNA	ung15220	AATGGTAACCTGTCCGAG	GCACAAATTTACACCGCC	-	No	No
unigene30705	508	unknown [Picea sitchensis]	ung30705	CGAACATTTCAACTCACAAAGG	GAATACATACATGTCAGCCACC	-	No	No
unigene52225	105		ung52225	CAGTTATGTAAAGTCCCTTGTC	GTAGAGAAATGTTGAAGCGT	58	Yes	No
unigene58419	178	pentatricopeptide repeat-containing protein At3g16610 [Prunus mume]	PCMP-E91	GGATTGCTATGTGCTTCTC	GGTGTGATTTGTCTCCTCC	58	Yes	Yes
unigene66495	377	laccase-3 [Tarenaya hassleriana]	LAC3	TGGCTGTCACTCATCAAAGAC	CCTAACATGGAGCGTTGGA	-	No	No
unigene101440	40		ung101440	TCAGAGCCTTTCTAATCCCAG	AAGCACAAGCATCTCCGA	-	No	No
unigene112377	148, 156		ung112377	GGGAACCTATTCAAATGGAG	AGGCATCTTCCTTAAGAAGTG	-	No	No
unigene188104	297, 298, 305		ung188104	CTAAATGCCTGCTCGCCT	CTTGTGGGTAAGTTGTTCTTGG	67	Yes	No
unigene194909	606	exosome complex exonuclease RRP46 homolog isoform X1 [Gossypium raimondii]	RRP46	GATCAACTATTGAACAGGGC	TATCATTGTCTTTCCAAGGC	-	No	No
unigene201024	150		ung201024	AATCTGGAGTGCCAAATACCGA	TAGTGCTGCATCATGTCCTG	-	No	No

## Sheet: Supplementary Table S2
Supplementary Table S2. Summary of mapping statistic per sample and per sequencing lane. Ppi - Pinus pinaster; PWN - pinewood nematode; Stdev - standard deviation.
Sample	Lane	Number of reads
		Total reads	Mapped	% mapped	Uniquelly mapped	% unique	Mapped to Ppi	% mapped	Mapped PWN	% mapped
Sus1	L007	18014998	17583306	97.6037	10283721	58.4857	10187915	99.0684	95806	0.931628
Sus1	L008	18082500	17649371	97.6047	10320707	58.4763	10224872	99.0714	95835	0.92857
Sus2	L007	18658521	18219733	97.6483	10792857	59.2372	10710473	99.2367	82384	0.76332
Sus2	L008	18710449	18268943	97.6403	10823109	59.2432	10739763	99.2299	83346	0.770074
Sus3	L007	18642181	18210618	97.685	10448375	57.3752	10411636	99.6484	36739	0.351624
Sus3	L008	18695448	18261864	97.6808	10482178	57.3993	10445544	99.6505	36634	0.349488
Sus4	L007	18580778	18210274	98.006	10362207	56.9031	10323158	99.6232	39049	0.376841
Sus4	L008	18609267	18237581	98.0027	10337326	56.6815	10313155	99.7662	24171	0.233823
Res1	L007	17684685	17310185	97.8823	10094435	58.315	10005850	99.1224	88585	0.877563
Res1	L008	17742039	17366387	97.8827	10129673	58.3292	10041033	99.1249	88640	0.875053
Res2	L007	19128030	18713377	97.8322	10766974	57.5362	10680518	99.197	86456	0.802974
Res2	L008	19165850	18749710	97.8287	10787430	57.5338	10700918	99.198	86512	0.80197
Res3	L007	17221292	16835429	97.7594	9532517	56.6218	9487922	99.5322	44595	0.46782
Res3	L008	17295885	16908250	97.7588	9579852	56.6579	9534861	99.5304	44991	0.469642
Res4	L007	17508409	17118089	97.7707	9982692	58.3166	9886590	99.0373	96102	0.962686
Res4	L008	17563434	17172916	97.7765	10022088	58.3598	9925822	99.0395	96266	0.960538
Res5	L007	20254875	19805327	97.7805	11440453	57.7645	11306892	98.8326	133561	1.16745
Res5	L008	20299890	19850425	97.7859	11468651	57.7753	11334378	98.8292	134273	1.17078
Average		1.83244e+07	1.79183e+07	97.7843	1.03608e+07	57.8218	1.02911e+07	99.3361	69709.3	0.66388
Stdev		920312	899023	0.117977	539117	0.77617	516995	0.354478	38911.8	0.354478

## Sheet: Supplementary Table S3
Supplementary Table S3. SNPs detected in P. pinaster RNA-seq data.
Transcript	Sequence	SNP position	Reference Allele	Alternative Allele
contig02469	GGGCGTCCCTGGCCTCCTAAGACTATATAAGCCTTACCAGAAGCTAATGGTTTCAGCTGAGAGGGTGGTCTAAGAGCATATAGTTTGTTTTTAAGTGGTGGTTTTTTCTGGATATTTTTCCTGAATAGTAGCGGTTTCGATTGCTGGGGAAGGAAGCAGCAGCTGGTTTGAAAGTTGCAGCAGCGGTTTTGGAAACAAAACAATGTGTGGAGGTTCCGTTATCTCGGATTACATTCCCAATCAATCTCGGCGTGTAACTCCTAGGGAGCTATGGCCGGATTTCGACACGTTCGCTGAATTCATCAATGGCGGAGGAGTGCAGGAAACCTTCAATAAACCTCGCAAGTTGGACGAGGGATGCAAGCAGAAGAGTAATCCCAGCAAGGGCTTTGTCAAGAC…	143	G	C
contig02469	GGGCGTCCCTGGCCTCCTAAGACTATATAAGCCTTACCAGAAGCTAATGGTTTCAGCTGAGAGGGTGGTCTAAGAGCATATAGTTTGTTTTTAAGTGGTGGTTTTTTCTGGATATTTTTCCTGAATAGTAGCGGTTTCGATTGCTGGGGAAGGAAGCAGCAGCTGGTTTGAAAGTTGCAGCAGCGGTTTTGGAAACAAAACAATGTGTGGAGGTTCCGTTATCTCGGATTACATTCCCAATCAATCTCGGCGTGTAACTCCTAGGGAGCTATGGCCGGATTTCGACACGTTCGCTGAATTCATCAATGGCGGAGGAGTGCAGGAAACCTTCAATAAACCTCGCAAGTTGGACGAGGGATGCAAGCAGAAGAGTAATCCCAGCAAGGGCTTTGTCAAGAC…	685	T	A
contig02469	GGGCGTCCCTGGCCTCCTAAGACTATATAAGCCTTACCAGAAGCTAATGGTTTCAGCTGAGAGGGTGGTCTAAGAGCATATAGTTTGTTTTTAAGTGGTGGTTTTTTCTGGATATTTTTCCTGAATAGTAGCGGTTTCGATTGCTGGGGAAGGAAGCAGCAGCTGGTTTGAAAGTTGCAGCAGCGGTTTTGGAAACAAAACAATGTGTGGAGGTTCCGTTATCTCGGATTACATTCCCAATCAATCTCGGCGTGTAACTCCTAGGGAGCTATGGCCGGATTTCGACACGTTCGCTGAATTCATCAATGGCGGAGGAGTGCAGGAAACCTTCAATAAACCTCGCAAGTTGGACGAGGGATGCAAGCAGAAGAGTAATCCCAGCAAGGGCTTTGTCAAGAC…	926	G	A
contig02469	GGGCGTCCCTGGCCTCCTAAGACTATATAAGCCTTACCAGAAGCTAATGGTTTCAGCTGAGAGGGTGGTCTAAGAGCATATAGTTTGTTTTTAAGTGGTGGTTTTTTCTGGATATTTTTCCTGAATAGTAGCGGTTTCGATTGCTGGGGAAGGAAGCAGCAGCTGGTTTGAAAGTTGCAGCAGCGGTTTTGGAAACAAAACAATGTGTGGAGGTTCCGTTATCTCGGATTACATTCCCAATCAATCTCGGCGTGTAACTCCTAGGGAGCTATGGCCGGATTTCGACACGTTCGCTGAATTCATCAATGGCGGAGGAGTGCAGGAAACCTTCAATAAACCTCGCAAGTTGGACGAGGGATGCAAGCAGAAGAGTAATCCCAGCAAGGGCTTTGTCAAGAC…	1085	C	T
contig02469	GGGCGTCCCTGGCCTCCTAAGACTATATAAGCCTTACCAGAAGCTAATGGTTTCAGCTGAGAGGGTGGTCTAAGAGCATATAGTTTGTTTTTAAGTGGTGGTTTTTTCTGGATATTTTTCCTGAATAGTAGCGGTTTCGATTGCTGGGGAAGGAAGCAGCAGCTGGTTTGAAAGTTGCAGCAGCGGTTTTGGAAACAAAACAATGTGTGGAGGTTCCGTTATCTCGGATTACATTCCCAATCAATCTCGGCGTGTAACTCCTAGGGAGCTATGGCCGGATTTCGACACGTTCGCTGAATTCATCAATGGCGGAGGAGTGCAGGAAACCTTCAATAAACCTCGCAAGTTGGACGAGGGATGCAAGCAGAAGAGTAATCCCAGCAAGGGCTTTGTCAAGAC…	1171	G	T
contig02469	GGGCGTCCCTGGCCTCCTAAGACTATATAAGCCTTACCAGAAGCTAATGGTTTCAGCTGAGAGGGTGGTCTAAGAGCATATAGTTTGTTTTTAAGTGGTGGTTTTTTCTGGATATTTTTCCTGAATAGTAGCGGTTTCGATTGCTGGGGAAGGAAGCAGCAGCTGGTTTGAAAGTTGCAGCAGCGGTTTTGGAAACAAAACAATGTGTGGAGGTTCCGTTATCTCGGATTACATTCCCAATCAATCTCGGCGTGTAACTCCTAGGGAGCTATGGCCGGATTTCGACACGTTCGCTGAATTCATCAATGGCGGAGGAGTGCAGGAAACCTTCAATAAACCTCGCAAGTTGGACGAGGGATGCAAGCAGAAGAGTAATCCCAGCAAGGGCTTTGTCAAGAC…	1384	G	A
contig02469	GGGCGTCCCTGGCCTCCTAAGACTATATAAGCCTTACCAGAAGCTAATGGTTTCAGCTGAGAGGGTGGTCTAAGAGCATATAGTTTGTTTTTAAGTGGTGGTTTTTTCTGGATATTTTTCCTGAATAGTAGCGGTTTCGATTGCTGGGGAAGGAAGCAGCAGCTGGTTTGAAAGTTGCAGCAGCGGTTTTGGAAACAAAACAATGTGTGGAGGTTCCGTTATCTCGGATTACATTCCCAATCAATCTCGGCGTGTAACTCCTAGGGAGCTATGGCCGGATTTCGACACGTTCGCTGAATTCATCAATGGCGGAGGAGTGCAGGAAACCTTCAATAAACCTCGCAAGTTGGACGAGGGATGCAAGCAGAAGAGTAATCCCAGCAAGGGCTTTGTCAAGAC…	1489	G	A
contig03092	TATTAGTTGGAATGTTTCTTTCTTAAAAAAATATTGTGGAATGTAAAAAGGGCAAGATTCAATTGCAATGCCCCATCACAGCTAAATCCCAATAACTTCCGTTGGGAAACAAAATCCGGAACTGGTTCTACATATTGCACTTCTGATAAATATCAAGATACTATCTAAAATGGATCAAAATATGATAAAAATCATACCTCTAGCCAGACTTGAACAACACTGGCACTTAAATCAGGTATTCGAAGAATCAGATATGAAACCCATAATCGAGGTTGCCATATTCAATAGTTTGTTGACAAAATTTGAAAATAGTGAACCCTAATGAACCCCAAAAAACGCGGTCTGCTTTCAAGGAAAAATCCATCTGCGTCTTACCTCGCAGTTTCAAGCTTTCTCCCA…	165	C	A
contig03092	TATTAGTTGGAATGTTTCTTTCTTAAAAAAATATTGTGGAATGTAAAAAGGGCAAGATTCAATTGCAATGCCCCATCACAGCTAAATCCCAATAACTTCCGTTGGGAAACAAAATCCGGAACTGGTTCTACATATTGCACTTCTGATAAATATCAAGATACTATCTAAAATGGATCAAAATATGATAAAAATCATACCTCTAGCCAGACTTGAACAACACTGGCACTTAAATCAGGTATTCGAAGAATCAGATATGAAACCCATAATCGAGGTTGCCATATTCAATAGTTTGTTGACAAAATTTGAAAATAGTGAACCCTAATGAACCCCAAAAAACGCGGTCTGCTTTCAAGGAAAAATCCATCTGCGTCTTACCTCGCAGTTTCAAGCTTTCTCCCA…	172	G	A
contig03092	TATTAGTTGGAATGTTTCTTTCTTAAAAAAATATTGTGGAATGTAAAAAGGGCAAGATTCAATTGCAATGCCCCATCACAGCTAAATCCCAATAACTTCCGTTGGGAAACAAAATCCGGAACTGGTTCTACATATTGCACTTCTGATAAATATCAAGATACTATCTAAAATGGATCAAAATATGATAAAAATCATACCTCTAGCCAGACTTGAACAACACTGGCACTTAAATCAGGTATTCGAAGAATCAGATATGAAACCCATAATCGAGGTTGCCATATTCAATAGTTTGTTGACAAAATTTGAAAATAGTGAACCCTAATGAACCCCAAAAAACGCGGTCTGCTTTCAAGGAAAAATCCATCTGCGTCTTACCTCGCAGTTTCAAGCTTTCTCCCA…	173	G	A
contig03092	TATTAGTTGGAATGTTTCTTTCTTAAAAAAATATTGTGGAATGTAAAAAGGGCAAGATTCAATTGCAATGCCCCATCACAGCTAAATCCCAATAACTTCCGTTGGGAAACAAAATCCGGAACTGGTTCTACATATTGCACTTCTGATAAATATCAAGATACTATCTAAAATGGATCAAAATATGATAAAAATCATACCTCTAGCCAGACTTGAACAACACTGGCACTTAAATCAGGTATTCGAAGAATCAGATATGAAACCCATAATCGAGGTTGCCATATTCAATAGTTTGTTGACAAAATTTGAAAATAGTGAACCCTAATGAACCCCAAAAAACGCGGTCTGCTTTCAAGGAAAAATCCATCTGCGTCTTACCTCGCAGTTTCAAGCTTTCTCCCA…	354	G	A
contig03092	TATTAGTTGGAATGTTTCTTTCTTAAAAAAATATTGTGGAATGTAAAAAGGGCAAGATTCAATTGCAATGCCCCATCACAGCTAAATCCCAATAACTTCCGTTGGGAAACAAAATCCGGAACTGGTTCTACATATTGCACTTCTGATAAATATCAAGATACTATCTAAAATGGATCAAAATATGATAAAAATCATACCTCTAGCCAGACTTGAACAACACTGGCACTTAAATCAGGTATTCGAAGAATCAGATATGAAACCCATAATCGAGGTTGCCATATTCAATAGTTTGTTGACAAAATTTGAAAATAGTGAACCCTAATGAACCCCAAAAAACGCGGTCTGCTTTCAAGGAAAAATCCATCTGCGTCTTACCTCGCAGTTTCAAGCTTTCTCCCA…	508	G	A
contig03092	TATTAGTTGGAATGTTTCTTTCTTAAAAAAATATTGTGGAATGTAAAAAGGGCAAGATTCAATTGCAATGCCCCATCACAGCTAAATCCCAATAACTTCCGTTGGGAAACAAAATCCGGAACTGGTTCTACATATTGCACTTCTGATAAATATCAAGATACTATCTAAAATGGATCAAAATATGATAAAAATCATACCTCTAGCCAGACTTGAACAACACTGGCACTTAAATCAGGTATTCGAAGAATCAGATATGAAACCCATAATCGAGGTTGCCATATTCAATAGTTTGTTGACAAAATTTGAAAATAGTGAACCCTAATGAACCCCAAAAAACGCGGTCTGCTTTCAAGGAAAAATCCATCTGCGTCTTACCTCGCAGTTTCAAGCTTTCTCCCA…	655	G	A
contig03092	TATTAGTTGGAATGTTTCTTTCTTAAAAAAATATTGTGGAATGTAAAAAGGGCAAGATTCAATTGCAATGCCCCATCACAGCTAAATCCCAATAACTTCCGTTGGGAAACAAAATCCGGAACTGGTTCTACATATTGCACTTCTGATAAATATCAAGATACTATCTAAAATGGATCAAAATATGATAAAAATCATACCTCTAGCCAGACTTGAACAACACTGGCACTTAAATCAGGTATTCGAAGAATCAGATATGAAACCCATAATCGAGGTTGCCATATTCAATAGTTTGTTGACAAAATTTGAAAATAGTGAACCCTAATGAACCCCAAAAAACGCGGTCTGCTTTCAAGGAAAAATCCATCTGCGTCTTACCTCGCAGTTTCAAGCTTTCTCCCA…	1228	G	A
contig03092	TATTAGTTGGAATGTTTCTTTCTTAAAAAAATATTGTGGAATGTAAAAAGGGCAAGATTCAATTGCAATGCCCCATCACAGCTAAATCCCAATAACTTCCGTTGGGAAACAAAATCCGGAACTGGTTCTACATATTGCACTTCTGATAAATATCAAGATACTATCTAAAATGGATCAAAATATGATAAAAATCATACCTCTAGCCAGACTTGAACAACACTGGCACTTAAATCAGGTATTCGAAGAATCAGATATGAAACCCATAATCGAGGTTGCCATATTCAATAGTTTGTTGACAAAATTTGAAAATAGTGAACCCTAATGAACCCCAAAAAACGCGGTCTGCTTTCAAGGAAAAATCCATCTGCGTCTTACCTCGCAGTTTCAAGCTTTCTCCCA…	1619	A	T
isotig00001	CCCCCTTTGGCCTTGCCCTGACCCTTGGCCATCCCATCAAGGCAACGTTAAGGGTCAAGTCAATGGCTGCATGCAACGCATGAGACTGACGGGGGAGGCCATTGAACATCGGCATTGAACGCTTAACCTGTAATGGTAGTTCCAGGTTTCCTATTAATATTCAACCCTCACAATGGCCACTGCAATCCCATTCTTCCCCGATTAGGTTTCCCTAAGAATTCGTACTATGGTGGCCTCCAAGTTGAAGCTGATGTTCTTCATTTTCCTCTCACTGCAACTCTCTGCAACATTGTCTCAACCCAAAGAACATGAAATGAATGGAGTGTCCATGACCCTCCACATGAAGATGAGGATGAAGAGCAAGTCCACAAAGAAGATCAGCGTGGAGGAGCCTCTGTA…	380	A	G
isotig00001	CCCCCTTTGGCCTTGCCCTGACCCTTGGCCATCCCATCAAGGCAACGTTAAGGGTCAAGTCAATGGCTGCATGCAACGCATGAGACTGACGGGGGAGGCCATTGAACATCGGCATTGAACGCTTAACCTGTAATGGTAGTTCCAGGTTTCCTATTAATATTCAACCCTCACAATGGCCACTGCAATCCCATTCTTCCCCGATTAGGTTTCCCTAAGAATTCGTACTATGGTGGCCTCCAAGTTGAAGCTGATGTTCTTCATTTTCCTCTCACTGCAACTCTCTGCAACATTGTCTCAACCCAAAGAACATGAAATGAATGGAGTGTCCATGACCCTCCACATGAAGATGAGGATGAAGAGCAAGTCCACAAAGAAGATCAGCGTGGAGGAGCCTCTGTA…	517	T	C
isotig00001	CCCCCTTTGGCCTTGCCCTGACCCTTGGCCATCCCATCAAGGCAACGTTAAGGGTCAAGTCAATGGCTGCATGCAACGCATGAGACTGACGGGGGAGGCCATTGAACATCGGCATTGAACGCTTAACCTGTAATGGTAGTTCCAGGTTTCCTATTAATATTCAACCCTCACAATGGCCACTGCAATCCCATTCTTCCCCGATTAGGTTTCCCTAAGAATTCGTACTATGGTGGCCTCCAAGTTGAAGCTGATGTTCTTCATTTTCCTCTCACTGCAACTCTCTGCAACATTGTCTCAACCCAAAGAACATGAAATGAATGGAGTGTCCATGACCCTCCACATGAAGATGAGGATGAAGAGCAAGTCCACAAAGAAGATCAGCGTGGAGGAGCCTCTGTA…	685	T	C
isotig00001	CCCCCTTTGGCCTTGCCCTGACCCTTGGCCATCCCATCAAGGCAACGTTAAGGGTCAAGTCAATGGCTGCATGCAACGCATGAGACTGACGGGGGAGGCCATTGAACATCGGCATTGAACGCTTAACCTGTAATGGTAGTTCCAGGTTTCCTATTAATATTCAACCCTCACAATGGCCACTGCAATCCCATTCTTCCCCGATTAGGTTTCCCTAAGAATTCGTACTATGGTGGCCTCCAAGTTGAAGCTGATGTTCTTCATTTTCCTCTCACTGCAACTCTCTGCAACATTGTCTCAACCCAAAGAACATGAAATGAATGGAGTGTCCATGACCCTCCACATGAAGATGAGGATGAAGAGCAAGTCCACAAAGAAGATCAGCGTGGAGGAGCCTCTGTA…	741	C	A
isotig00001	CCCCCTTTGGCCTTGCCCTGACCCTTGGCCATCCCATCAAGGCAACGTTAAGGGTCAAGTCAATGGCTGCATGCAACGCATGAGACTGACGGGGGAGGCCATTGAACATCGGCATTGAACGCTTAACCTGTAATGGTAGTTCCAGGTTTCCTATTAATATTCAACCCTCACAATGGCCACTGCAATCCCATTCTTCCCCGATTAGGTTTCCCTAAGAATTCGTACTATGGTGGCCTCCAAGTTGAAGCTGATGTTCTTCATTTTCCTCTCACTGCAACTCTCTGCAACATTGTCTCAACCCAAAGAACATGAAATGAATGGAGTGTCCATGACCCTCCACATGAAGATGAGGATGAAGAGCAAGTCCACAAAGAAGATCAGCGTGGAGGAGCCTCTGTA…	837	C	G
isotig00001	CCCCCTTTGGCCTTGCCCTGACCCTTGGCCATCCCATCAAGGCAACGTTAAGGGTCAAGTCAATGGCTGCATGCAACGCATGAGACTGACGGGGGAGGCCATTGAACATCGGCATTGAACGCTTAACCTGTAATGGTAGTTCCAGGTTTCCTATTAATATTCAACCCTCACAATGGCCACTGCAATCCCATTCTTCCCCGATTAGGTTTCCCTAAGAATTCGTACTATGGTGGCCTCCAAGTTGAAGCTGATGTTCTTCATTTTCCTCTCACTGCAACTCTCTGCAACATTGTCTCAACCCAAAGAACATGAAATGAATGGAGTGTCCATGACCCTCCACATGAAGATGAGGATGAAGAGCAAGTCCACAAAGAAGATCAGCGTGGAGGAGCCTCTGTA…	840	A	C
isotig00001	CCCCCTTTGGCCTTGCCCTGACCCTTGGCCATCCCATCAAGGCAACGTTAAGGGTCAAGTCAATGGCTGCATGCAACGCATGAGACTGACGGGGGAGGCCATTGAACATCGGCATTGAACGCTTAACCTGTAATGGTAGTTCCAGGTTTCCTATTAATATTCAACCCTCACAATGGCCACTGCAATCCCATTCTTCCCCGATTAGGTTTCCCTAAGAATTCGTACTATGGTGGCCTCCAAGTTGAAGCTGATGTTCTTCATTTTCCTCTCACTGCAACTCTCTGCAACATTGTCTCAACCCAAAGAACATGAAATGAATGGAGTGTCCATGACCCTCCACATGAAGATGAGGATGAAGAGCAAGTCCACAAAGAAGATCAGCGTGGAGGAGCCTCTGTA…	862	T	C
isotig00001	CCCCCTTTGGCCTTGCCCTGACCCTTGGCCATCCCATCAAGGCAACGTTAAGGGTCAAGTCAATGGCTGCATGCAACGCATGAGACTGACGGGGGAGGCCATTGAACATCGGCATTGAACGCTTAACCTGTAATGGTAGTTCCAGGTTTCCTATTAATATTCAACCCTCACAATGGCCACTGCAATCCCATTCTTCCCCGATTAGGTTTCCCTAAGAATTCGTACTATGGTGGCCTCCAAGTTGAAGCTGATGTTCTTCATTTTCCTCTCACTGCAACTCTCTGCAACATTGTCTCAACCCAAAGAACATGAAATGAATGGAGTGTCCATGACCCTCCACATGAAGATGAGGATGAAGAGCAAGTCCACAAAGAAGATCAGCGTGGAGGAGCCTCTGTA…	868	T	A
isotig00001	CCCCCTTTGGCCTTGCCCTGACCCTTGGCCATCCCATCAAGGCAACGTTAAGGGTCAAGTCAATGGCTGCATGCAACGCATGAGACTGACGGGGGAGGCCATTGAACATCGGCATTGAACGCTTAACCTGTAATGGTAGTTCCAGGTTTCCTATTAATATTCAACCCTCACAATGGCCACTGCAATCCCATTCTTCCCCGATTAGGTTTCCCTAAGAATTCGTACTATGGTGGCCTCCAAGTTGAAGCTGATGTTCTTCATTTTCCTCTCACTGCAACTCTCTGCAACATTGTCTCAACCCAAAGAACATGAAATGAATGGAGTGTCCATGACCCTCCACATGAAGATGAGGATGAAGAGCAAGTCCACAAAGAAGATCAGCGTGGAGGAGCCTCTGTA…	872	G	A
isotig00001	CCCCCTTTGGCCTTGCCCTGACCCTTGGCCATCCCATCAAGGCAACGTTAAGGGTCAAGTCAATGGCTGCATGCAACGCATGAGACTGACGGGGGAGGCCATTGAACATCGGCATTGAACGCTTAACCTGTAATGGTAGTTCCAGGTTTCCTATTAATATTCAACCCTCACAATGGCCACTGCAATCCCATTCTTCCCCGATTAGGTTTCCCTAAGAATTCGTACTATGGTGGCCTCCAAGTTGAAGCTGATGTTCTTCATTTTCCTCTCACTGCAACTCTCTGCAACATTGTCTCAACCCAAAGAACATGAAATGAATGGAGTGTCCATGACCCTCCACATGAAGATGAGGATGAAGAGCAAGTCCACAAAGAAGATCAGCGTGGAGGAGCCTCTGTA…	907	A	G
isotig00001	CCCCCTTTGGCCTTGCCCTGACCCTTGGCCATCCCATCAAGGCAACGTTAAGGGTCAAGTCAATGGCTGCATGCAACGCATGAGACTGACGGGGGAGGCCATTGAACATCGGCATTGAACGCTTAACCTGTAATGGTAGTTCCAGGTTTCCTATTAATATTCAACCCTCACAATGGCCACTGCAATCCCATTCTTCCCCGATTAGGTTTCCCTAAGAATTCGTACTATGGTGGCCTCCAAGTTGAAGCTGATGTTCTTCATTTTCCTCTCACTGCAACTCTCTGCAACATTGTCTCAACCCAAAGAACATGAAATGAATGGAGTGTCCATGACCCTCCACATGAAGATGAGGATGAAGAGCAAGTCCACAAAGAAGATCAGCGTGGAGGAGCCTCTGTA…	928	G	T
isotig00001	CCCCCTTTGGCCTTGCCCTGACCCTTGGCCATCCCATCAAGGCAACGTTAAGGGTCAAGTCAATGGCTGCATGCAACGCATGAGACTGACGGGGGAGGCCATTGAACATCGGCATTGAACGCTTAACCTGTAATGGTAGTTCCAGGTTTCCTATTAATATTCAACCCTCACAATGGCCACTGCAATCCCATTCTTCCCCGATTAGGTTTCCCTAAGAATTCGTACTATGGTGGCCTCCAAGTTGAAGCTGATGTTCTTCATTTTCCTCTCACTGCAACTCTCTGCAACATTGTCTCAACCCAAAGAACATGAAATGAATGGAGTGTCCATGACCCTCCACATGAAGATGAGGATGAAGAGCAAGTCCACAAAGAAGATCAGCGTGGAGGAGCCTCTGTA…	947	C	G
isotig00001	CCCCCTTTGGCCTTGCCCTGACCCTTGGCCATCCCATCAAGGCAACGTTAAGGGTCAAGTCAATGGCTGCATGCAACGCATGAGACTGACGGGGGAGGCCATTGAACATCGGCATTGAACGCTTAACCTGTAATGGTAGTTCCAGGTTTCCTATTAATATTCAACCCTCACAATGGCCACTGCAATCCCATTCTTCCCCGATTAGGTTTCCCTAAGAATTCGTACTATGGTGGCCTCCAAGTTGAAGCTGATGTTCTTCATTTTCCTCTCACTGCAACTCTCTGCAACATTGTCTCAACCCAAAGAACATGAAATGAATGGAGTGTCCATGACCCTCCACATGAAGATGAGGATGAAGAGCAAGTCCACAAAGAAGATCAGCGTGGAGGAGCCTCTGTA…	959	T	G
isotig00001	CCCCCTTTGGCCTTGCCCTGACCCTTGGCCATCCCATCAAGGCAACGTTAAGGGTCAAGTCAATGGCTGCATGCAACGCATGAGACTGACGGGGGAGGCCATTGAACATCGGCATTGAACGCTTAACCTGTAATGGTAGTTCCAGGTTTCCTATTAATATTCAACCCTCACAATGGCCACTGCAATCCCATTCTTCCCCGATTAGGTTTCCCTAAGAATTCGTACTATGGTGGCCTCCAAGTTGAAGCTGATGTTCTTCATTTTCCTCTCACTGCAACTCTCTGCAACATTGTCTCAACCCAAAGAACATGAAATGAATGGAGTGTCCATGACCCTCCACATGAAGATGAGGATGAAGAGCAAGTCCACAAAGAAGATCAGCGTGGAGGAGCCTCTGTA…	961	T	C
isotig00001	CCCCCTTTGGCCTTGCCCTGACCCTTGGCCATCCCATCAAGGCAACGTTAAGGGTCAAGTCAATGGCTGCATGCAACGCATGAGACTGACGGGGGAGGCCATTGAACATCGGCATTGAACGCTTAACCTGTAATGGTAGTTCCAGGTTTCCTATTAATATTCAACCCTCACAATGGCCACTGCAATCCCATTCTTCCCCGATTAGGTTTCCCTAAGAATTCGTACTATGGTGGCCTCCAAGTTGAAGCTGATGTTCTTCATTTTCCTCTCACTGCAACTCTCTGCAACATTGTCTCAACCCAAAGAACATGAAATGAATGGAGTGTCCATGACCCTCCACATGAAGATGAGGATGAAGAGCAAGTCCACAAAGAAGATCAGCGTGGAGGAGCCTCTGTA…	973	T	C
isotig00001	CCCCCTTTGGCCTTGCCCTGACCCTTGGCCATCCCATCAAGGCAACGTTAAGGGTCAAGTCAATGGCTGCATGCAACGCATGAGACTGACGGGGGAGGCCATTGAACATCGGCATTGAACGCTTAACCTGTAATGGTAGTTCCAGGTTTCCTATTAATATTCAACCCTCACAATGGCCACTGCAATCCCATTCTTCCCCGATTAGGTTTCCCTAAGAATTCGTACTATGGTGGCCTCCAAGTTGAAGCTGATGTTCTTCATTTTCCTCTCACTGCAACTCTCTGCAACATTGTCTCAACCCAAAGAACATGAAATGAATGGAGTGTCCATGACCCTCCACATGAAGATGAGGATGAAGAGCAAGTCCACAAAGAAGATCAGCGTGGAGGAGCCTCTGTA…	992	G	A
isotig00001	CCCCCTTTGGCCTTGCCCTGACCCTTGGCCATCCCATCAAGGCAACGTTAAGGGTCAAGTCAATGGCTGCATGCAACGCATGAGACTGACGGGGGAGGCCATTGAACATCGGCATTGAACGCTTAACCTGTAATGGTAGTTCCAGGTTTCCTATTAATATTCAACCCTCACAATGGCCACTGCAATCCCATTCTTCCCCGATTAGGTTTCCCTAAGAATTCGTACTATGGTGGCCTCCAAGTTGAAGCTGATGTTCTTCATTTTCCTCTCACTGCAACTCTCTGCAACATTGTCTCAACCCAAAGAACATGAAATGAATGGAGTGTCCATGACCCTCCACATGAAGATGAGGATGAAGAGCAAGTCCACAAAGAAGATCAGCGTGGAGGAGCCTCTGTA…	1013	C	T
isotig00001	CCCCCTTTGGCCTTGCCCTGACCCTTGGCCATCCCATCAAGGCAACGTTAAGGGTCAAGTCAATGGCTGCATGCAACGCATGAGACTGACGGGGGAGGCCATTGAACATCGGCATTGAACGCTTAACCTGTAATGGTAGTTCCAGGTTTCCTATTAATATTCAACCCTCACAATGGCCACTGCAATCCCATTCTTCCCCGATTAGGTTTCCCTAAGAATTCGTACTATGGTGGCCTCCAAGTTGAAGCTGATGTTCTTCATTTTCCTCTCACTGCAACTCTCTGCAACATTGTCTCAACCCAAAGAACATGAAATGAATGGAGTGTCCATGACCCTCCACATGAAGATGAGGATGAAGAGCAAGTCCACAAAGAAGATCAGCGTGGAGGAGCCTCTGTA…	1094	C	G
isotig00001	CCCCCTTTGGCCTTGCCCTGACCCTTGGCCATCCCATCAAGGCAACGTTAAGGGTCAAGTCAATGGCTGCATGCAACGCATGAGACTGACGGGGGAGGCCATTGAACATCGGCATTGAACGCTTAACCTGTAATGGTAGTTCCAGGTTTCCTATTAATATTCAACCCTCACAATGGCCACTGCAATCCCATTCTTCCCCGATTAGGTTTCCCTAAGAATTCGTACTATGGTGGCCTCCAAGTTGAAGCTGATGTTCTTCATTTTCCTCTCACTGCAACTCTCTGCAACATTGTCTCAACCCAAAGAACATGAAATGAATGGAGTGTCCATGACCCTCCACATGAAGATGAGGATGAAGAGCAAGTCCACAAAGAAGATCAGCGTGGAGGAGCCTCTGTA…	1096	A	T
isotig00001	CCCCCTTTGGCCTTGCCCTGACCCTTGGCCATCCCATCAAGGCAACGTTAAGGGTCAAGTCAATGGCTGCATGCAACGCATGAGACTGACGGGGGAGGCCATTGAACATCGGCATTGAACGCTTAACCTGTAATGGTAGTTCCAGGTTTCCTATTAATATTCAACCCTCACAATGGCCACTGCAATCCCATTCTTCCCCGATTAGGTTTCCCTAAGAATTCGTACTATGGTGGCCTCCAAGTTGAAGCTGATGTTCTTCATTTTCCTCTCACTGCAACTCTCTGCAACATTGTCTCAACCCAAAGAACATGAAATGAATGGAGTGTCCATGACCCTCCACATGAAGATGAGGATGAAGAGCAAGTCCACAAAGAAGATCAGCGTGGAGGAGCCTCTGTA…	1099	A	C
isotig00001	CCCCCTTTGGCCTTGCCCTGACCCTTGGCCATCCCATCAAGGCAACGTTAAGGGTCAAGTCAATGGCTGCATGCAACGCATGAGACTGACGGGGGAGGCCATTGAACATCGGCATTGAACGCTTAACCTGTAATGGTAGTTCCAGGTTTCCTATTAATATTCAACCCTCACAATGGCCACTGCAATCCCATTCTTCCCCGATTAGGTTTCCCTAAGAATTCGTACTATGGTGGCCTCCAAGTTGAAGCTGATGTTCTTCATTTTCCTCTCACTGCAACTCTCTGCAACATTGTCTCAACCCAAAGAACATGAAATGAATGGAGTGTCCATGACCCTCCACATGAAGATGAGGATGAAGAGCAAGTCCACAAAGAAGATCAGCGTGGAGGAGCCTCTGTA…	1105	T	C
isotig00001	CCCCCTTTGGCCTTGCCCTGACCCTTGGCCATCCCATCAAGGCAACGTTAAGGGTCAAGTCAATGGCTGCATGCAACGCATGAGACTGACGGGGGAGGCCATTGAACATCGGCATTGAACGCTTAACCTGTAATGGTAGTTCCAGGTTTCCTATTAATATTCAACCCTCACAATGGCCACTGCAATCCCATTCTTCCCCGATTAGGTTTCCCTAAGAATTCGTACTATGGTGGCCTCCAAGTTGAAGCTGATGTTCTTCATTTTCCTCTCACTGCAACTCTCTGCAACATTGTCTCAACCCAAAGAACATGAAATGAATGGAGTGTCCATGACCCTCCACATGAAGATGAGGATGAAGAGCAAGTCCACAAAGAAGATCAGCGTGGAGGAGCCTCTGTA…	1109	A	G
isotig00001	CCCCCTTTGGCCTTGCCCTGACCCTTGGCCATCCCATCAAGGCAACGTTAAGGGTCAAGTCAATGGCTGCATGCAACGCATGAGACTGACGGGGGAGGCCATTGAACATCGGCATTGAACGCTTAACCTGTAATGGTAGTTCCAGGTTTCCTATTAATATTCAACCCTCACAATGGCCACTGCAATCCCATTCTTCCCCGATTAGGTTTCCCTAAGAATTCGTACTATGGTGGCCTCCAAGTTGAAGCTGATGTTCTTCATTTTCCTCTCACTGCAACTCTCTGCAACATTGTCTCAACCCAAAGAACATGAAATGAATGGAGTGTCCATGACCCTCCACATGAAGATGAGGATGAAGAGCAAGTCCACAAAGAAGATCAGCGTGGAGGAGCCTCTGTA…	1165	G	A
isotig00001	CCCCCTTTGGCCTTGCCCTGACCCTTGGCCATCCCATCAAGGCAACGTTAAGGGTCAAGTCAATGGCTGCATGCAACGCATGAGACTGACGGGGGAGGCCATTGAACATCGGCATTGAACGCTTAACCTGTAATGGTAGTTCCAGGTTTCCTATTAATATTCAACCCTCACAATGGCCACTGCAATCCCATTCTTCCCCGATTAGGTTTCCCTAAGAATTCGTACTATGGTGGCCTCCAAGTTGAAGCTGATGTTCTTCATTTTCCTCTCACTGCAACTCTCTGCAACATTGTCTCAACCCAAAGAACATGAAATGAATGGAGTGTCCATGACCCTCCACATGAAGATGAGGATGAAGAGCAAGTCCACAAAGAAGATCAGCGTGGAGGAGCCTCTGTA…	1201	A	G
isotig00001	CCCCCTTTGGCCTTGCCCTGACCCTTGGCCATCCCATCAAGGCAACGTTAAGGGTCAAGTCAATGGCTGCATGCAACGCATGAGACTGACGGGGGAGGCCATTGAACATCGGCATTGAACGCTTAACCTGTAATGGTAGTTCCAGGTTTCCTATTAATATTCAACCCTCACAATGGCCACTGCAATCCCATTCTTCCCCGATTAGGTTTCCCTAAGAATTCGTACTATGGTGGCCTCCAAGTTGAAGCTGATGTTCTTCATTTTCCTCTCACTGCAACTCTCTGCAACATTGTCTCAACCCAAAGAACATGAAATGAATGGAGTGTCCATGACCCTCCACATGAAGATGAGGATGAAGAGCAAGTCCACAAAGAAGATCAGCGTGGAGGAGCCTCTGTA…	1267	T	A
isotig00001	CCCCCTTTGGCCTTGCCCTGACCCTTGGCCATCCCATCAAGGCAACGTTAAGGGTCAAGTCAATGGCTGCATGCAACGCATGAGACTGACGGGGGAGGCCATTGAACATCGGCATTGAACGCTTAACCTGTAATGGTAGTTCCAGGTTTCCTATTAATATTCAACCCTCACAATGGCCACTGCAATCCCATTCTTCCCCGATTAGGTTTCCCTAAGAATTCGTACTATGGTGGCCTCCAAGTTGAAGCTGATGTTCTTCATTTTCCTCTCACTGCAACTCTCTGCAACATTGTCTCAACCCAAAGAACATGAAATGAATGGAGTGTCCATGACCCTCCACATGAAGATGAGGATGAAGAGCAAGTCCACAAAGAAGATCAGCGTGGAGGAGCCTCTGTA…	1272	G	C
isotig00001	CCCCCTTTGGCCTTGCCCTGACCCTTGGCCATCCCATCAAGGCAACGTTAAGGGTCAAGTCAATGGCTGCATGCAACGCATGAGACTGACGGGGGAGGCCATTGAACATCGGCATTGAACGCTTAACCTGTAATGGTAGTTCCAGGTTTCCTATTAATATTCAACCCTCACAATGGCCACTGCAATCCCATTCTTCCCCGATTAGGTTTCCCTAAGAATTCGTACTATGGTGGCCTCCAAGTTGAAGCTGATGTTCTTCATTTTCCTCTCACTGCAACTCTCTGCAACATTGTCTCAACCCAAAGAACATGAAATGAATGGAGTGTCCATGACCCTCCACATGAAGATGAGGATGAAGAGCAAGTCCACAAAGAAGATCAGCGTGGAGGAGCCTCTGTA…	1328	G	A
isotig00001	CCCCCTTTGGCCTTGCCCTGACCCTTGGCCATCCCATCAAGGCAACGTTAAGGGTCAAGTCAATGGCTGCATGCAACGCATGAGACTGACGGGGGAGGCCATTGAACATCGGCATTGAACGCTTAACCTGTAATGGTAGTTCCAGGTTTCCTATTAATATTCAACCCTCACAATGGCCACTGCAATCCCATTCTTCCCCGATTAGGTTTCCCTAAGAATTCGTACTATGGTGGCCTCCAAGTTGAAGCTGATGTTCTTCATTTTCCTCTCACTGCAACTCTCTGCAACATTGTCTCAACCCAAAGAACATGAAATGAATGGAGTGTCCATGACCCTCCACATGAAGATGAGGATGAAGAGCAAGTCCACAAAGAAGATCAGCGTGGAGGAGCCTCTGTA…	1409	G	A
isotig00001	CCCCCTTTGGCCTTGCCCTGACCCTTGGCCATCCCATCAAGGCAACGTTAAGGGTCAAGTCAATGGCTGCATGCAACGCATGAGACTGACGGGGGAGGCCATTGAACATCGGCATTGAACGCTTAACCTGTAATGGTAGTTCCAGGTTTCCTATTAATATTCAACCCTCACAATGGCCACTGCAATCCCATTCTTCCCCGATTAGGTTTCCCTAAGAATTCGTACTATGGTGGCCTCCAAGTTGAAGCTGATGTTCTTCATTTTCCTCTCACTGCAACTCTCTGCAACATTGTCTCAACCCAAAGAACATGAAATGAATGGAGTGTCCATGACCCTCCACATGAAGATGAGGATGAAGAGCAAGTCCACAAAGAAGATCAGCGTGGAGGAGCCTCTGTA…	1465	G	C
isotig00001	CCCCCTTTGGCCTTGCCCTGACCCTTGGCCATCCCATCAAGGCAACGTTAAGGGTCAAGTCAATGGCTGCATGCAACGCATGAGACTGACGGGGGAGGCCATTGAACATCGGCATTGAACGCTTAACCTGTAATGGTAGTTCCAGGTTTCCTATTAATATTCAACCCTCACAATGGCCACTGCAATCCCATTCTTCCCCGATTAGGTTTCCCTAAGAATTCGTACTATGGTGGCCTCCAAGTTGAAGCTGATGTTCTTCATTTTCCTCTCACTGCAACTCTCTGCAACATTGTCTCAACCCAAAGAACATGAAATGAATGGAGTGTCCATGACCCTCCACATGAAGATGAGGATGAAGAGCAAGTCCACAAAGAAGATCAGCGTGGAGGAGCCTCTGTA…	1750	T	A
isotig00001	CCCCCTTTGGCCTTGCCCTGACCCTTGGCCATCCCATCAAGGCAACGTTAAGGGTCAAGTCAATGGCTGCATGCAACGCATGAGACTGACGGGGGAGGCCATTGAACATCGGCATTGAACGCTTAACCTGTAATGGTAGTTCCAGGTTTCCTATTAATATTCAACCCTCACAATGGCCACTGCAATCCCATTCTTCCCCGATTAGGTTTCCCTAAGAATTCGTACTATGGTGGCCTCCAAGTTGAAGCTGATGTTCTTCATTTTCCTCTCACTGCAACTCTCTGCAACATTGTCTCAACCCAAAGAACATGAAATGAATGGAGTGTCCATGACCCTCCACATGAAGATGAGGATGAAGAGCAAGTCCACAAAGAAGATCAGCGTGGAGGAGCCTCTGTA…	1792	C	A
contig03764	GAAACGTATAAAGAAAATGCATTAATATATGTAACTGATGCATTGTTCATGCCATTACAGTATATAATAGCTTAAACCTGCGTCGCAGCAAACCAGATCATAACAAATCATAGCGAACTACCTTCTTACCAGCTTAGGTGAATCCCTTAGGAGCTAATTGGATCCCCTGTAATGTTCATTGCTGGAACCACCATGAACTGAAACTTTGAACGCATCTCTTACATCTGTGTATACCATTATTATATAGTATGTATATATATCTTCCACAATAACGCAATAATCCTAACCCTAAGTCGGACCATCTCACTTGATTCCCCGCAATGTAATCTTGCTCTCTTGATTTTACTAAGTTTGGCATAACTGATCCTAAGATCAAGAGAGGAAAGTGTTTAAATTGAC…	155	T	G
contig03764	GAAACGTATAAAGAAAATGCATTAATATATGTAACTGATGCATTGTTCATGCCATTACAGTATATAATAGCTTAAACCTGCGTCGCAGCAAACCAGATCATAACAAATCATAGCGAACTACCTTCTTACCAGCTTAGGTGAATCCCTTAGGAGCTAATTGGATCCCCTGTAATGTTCATTGCTGGAACCACCATGAACTGAAACTTTGAACGCATCTCTTACATCTGTGTATACCATTATTATATAGTATGTATATATATCTTCCACAATAACGCAATAATCCTAACCCTAAGTCGGACCATCTCACTTGATTCCCCGCAATGTAATCTTGCTCTCTTGATTTTACTAAGTTTGGCATAACTGATCCTAAGATCAAGAGAGGAAAGTGTTTAAATTGAC…	160	G	A
contig03889	GCAACCTACCTTACCAAATTTCTCCGGTCCCGACGGAACCGGAGATCCAGACACCGTTCGTAGCGTGGATGCCATCTAAGCTTTCCCCATTTTACCGGTGATGGGAGGGTGATTTGCTACGAACTCACGCATACGGTGACTGGCGGGGCCCGTTTCGGAAGGTGGCCTCCGGTAATTGTTCTTGGTGACTGTGTCCTCGGCTGTGAGTGGCTATAAAAATCATTCAGCTTGCTAATTCGAGCATACTCTCCTTCAATCCTTTGAAGGAACAGCAGGAATCTATCTGTTTACTAACGGAATCTCTGCTGGTCTCCGTCTCTGTCTCTGGTTTGCAGCACCTTTTCTTCGAAGGGAAGTTAGGACTTTTCAAGCCCGAAAGCAATGGCTTCCCACGTTGTT…	285	T	C
contig03974	ACGGGGGTGGATGTGAGAAGCAGCATTTTTAATGTTCTAAAAGCGTTCGGTACCGCCATGTCTGAAATCCATGGCGGTTTGTACCAGAGACTTTTGGGATCCAGGTAGAATGCCATAATTTTTACTGACGGTGGAGGCAAAGATGTTGGAAAATTGTGTTGTGCCGAGCTGTATCCATGGAATGGGTAGAATTGAAAAGAAGAACTTCATATAAAAATGTCTGATTCTGATCACCCAGCAAAGAGAATAAAGGCAAATAAGAAGTCACATGAATCTGTGAGGGAGAAGACAAAAGAGGACATGCTGGTATGCTGGTATGGTCAAAGAAAGATAATCTGACTATCATGGAAGTTTGTTTGTACTGTATGAAAAGGGGCTTAAACTTCCTGCAAATGTTAT…	727	G	A
contig03974	ACGGGGGTGGATGTGAGAAGCAGCATTTTTAATGTTCTAAAAGCGTTCGGTACCGCCATGTCTGAAATCCATGGCGGTTTGTACCAGAGACTTTTGGGATCCAGGTAGAATGCCATAATTTTTACTGACGGTGGAGGCAAAGATGTTGGAAAATTGTGTTGTGCCGAGCTGTATCCATGGAATGGGTAGAATTGAAAAGAAGAACTTCATATAAAAATGTCTGATTCTGATCACCCAGCAAAGAGAATAAAGGCAAATAAGAAGTCACATGAATCTGTGAGGGAGAAGACAAAAGAGGACATGCTGGTATGCTGGTATGGTCAAAGAAAGATAATCTGACTATCATGGAAGTTTGTTTGTACTGTATGAAAAGGGGCTTAAACTTCCTGCAAATGTTAT…	789	G	A
contig03974	ACGGGGGTGGATGTGAGAAGCAGCATTTTTAATGTTCTAAAAGCGTTCGGTACCGCCATGTCTGAAATCCATGGCGGTTTGTACCAGAGACTTTTGGGATCCAGGTAGAATGCCATAATTTTTACTGACGGTGGAGGCAAAGATGTTGGAAAATTGTGTTGTGCCGAGCTGTATCCATGGAATGGGTAGAATTGAAAAGAAGAACTTCATATAAAAATGTCTGATTCTGATCACCCAGCAAAGAGAATAAAGGCAAATAAGAAGTCACATGAATCTGTGAGGGAGAAGACAAAAGAGGACATGCTGGTATGCTGGTATGGTCAAAGAAAGATAATCTGACTATCATGGAAGTTTGTTTGTACTGTATGAAAAGGGGCTTAAACTTCCTGCAAATGTTAT…	854	G	A
contig03974	ACGGGGGTGGATGTGAGAAGCAGCATTTTTAATGTTCTAAAAGCGTTCGGTACCGCCATGTCTGAAATCCATGGCGGTTTGTACCAGAGACTTTTGGGATCCAGGTAGAATGCCATAATTTTTACTGACGGTGGAGGCAAAGATGTTGGAAAATTGTGTTGTGCCGAGCTGTATCCATGGAATGGGTAGAATTGAAAAGAAGAACTTCATATAAAAATGTCTGATTCTGATCACCCAGCAAAGAGAATAAAGGCAAATAAGAAGTCACATGAATCTGTGAGGGAGAAGACAAAAGAGGACATGCTGGTATGCTGGTATGGTCAAAGAAAGATAATCTGACTATCATGGAAGTTTGTTTGTACTGTATGAAAAGGGGCTTAAACTTCCTGCAAATGTTAT…	2366	G	A
contig03974	ACGGGGGTGGATGTGAGAAGCAGCATTTTTAATGTTCTAAAAGCGTTCGGTACCGCCATGTCTGAAATCCATGGCGGTTTGTACCAGAGACTTTTGGGATCCAGGTAGAATGCCATAATTTTTACTGACGGTGGAGGCAAAGATGTTGGAAAATTGTGTTGTGCCGAGCTGTATCCATGGAATGGGTAGAATTGAAAAGAAGAACTTCATATAAAAATGTCTGATTCTGATCACCCAGCAAAGAGAATAAAGGCAAATAAGAAGTCACATGAATCTGTGAGGGAGAAGACAAAAGAGGACATGCTGGTATGCTGGTATGGTCAAAGAAAGATAATCTGACTATCATGGAAGTTTGTTTGTACTGTATGAAAAGGGGCTTAAACTTCCTGCAAATGTTAT…	2373	G	A
contig03974	ACGGGGGTGGATGTGAGAAGCAGCATTTTTAATGTTCTAAAAGCGTTCGGTACCGCCATGTCTGAAATCCATGGCGGTTTGTACCAGAGACTTTTGGGATCCAGGTAGAATGCCATAATTTTTACTGACGGTGGAGGCAAAGATGTTGGAAAATTGTGTTGTGCCGAGCTGTATCCATGGAATGGGTAGAATTGAAAAGAAGAACTTCATATAAAAATGTCTGATTCTGATCACCCAGCAAAGAGAATAAAGGCAAATAAGAAGTCACATGAATCTGTGAGGGAGAAGACAAAAGAGGACATGCTGGTATGCTGGTATGGTCAAAGAAAGATAATCTGACTATCATGGAAGTTTGTTTGTACTGTATGAAAAGGGGCTTAAACTTCCTGCAAATGTTAT…	2431	T	C
contig03974	ACGGGGGTGGATGTGAGAAGCAGCATTTTTAATGTTCTAAAAGCGTTCGGTACCGCCATGTCTGAAATCCATGGCGGTTTGTACCAGAGACTTTTGGGATCCAGGTAGAATGCCATAATTTTTACTGACGGTGGAGGCAAAGATGTTGGAAAATTGTGTTGTGCCGAGCTGTATCCATGGAATGGGTAGAATTGAAAAGAAGAACTTCATATAAAAATGTCTGATTCTGATCACCCAGCAAAGAGAATAAAGGCAAATAAGAAGTCACATGAATCTGTGAGGGAGAAGACAAAAGAGGACATGCTGGTATGCTGGTATGGTCAAAGAAAGATAATCTGACTATCATGGAAGTTTGTTTGTACTGTATGAAAAGGGGCTTAAACTTCCTGCAAATGTTAT…	2438	T	C
contig03974	ACGGGGGTGGATGTGAGAAGCAGCATTTTTAATGTTCTAAAAGCGTTCGGTACCGCCATGTCTGAAATCCATGGCGGTTTGTACCAGAGACTTTTGGGATCCAGGTAGAATGCCATAATTTTTACTGACGGTGGAGGCAAAGATGTTGGAAAATTGTGTTGTGCCGAGCTGTATCCATGGAATGGGTAGAATTGAAAAGAAGAACTTCATATAAAAATGTCTGATTCTGATCACCCAGCAAAGAGAATAAAGGCAAATAAGAAGTCACATGAATCTGTGAGGGAGAAGACAAAAGAGGACATGCTGGTATGCTGGTATGGTCAAAGAAAGATAATCTGACTATCATGGAAGTTTGTTTGTACTGTATGAAAAGGGGCTTAAACTTCCTGCAAATGTTAT…	2456	G	A
isotig00098	TCATCCGACGGAAGAGATGATCGCCACCGCGTACAGCGTACGAATATAGACTGTAGAATACGAATAAAAGGCACAGGTATACGTATTCAGGCGATTCAAGAACCATTCAAGCGCTTTTAGATTAGCTTTGAGAGCAGACGGTTCTGATTCAGGTTGTTGGAATTCATTCCTTGGATGAACTCCGCATGGCGAGGGCAACAGCGAAGGCGAGGCTAATCTCGGCGGGCAGAACGCTCTGGAATGCTGGCGGATCAACGTTCTTAAGGGCTTGCCCTTAATCGGTAGGTCACACTTGATTTTATTGATCAGCTTGAATTTTTTTTTTTTAGGCTTTTGTTGATTATTTTTCTGATCGATCTGCAAACGTCTTGGGTGATTTAATCTGTGCACTGTATTGGC…	2491	A	G
isotig00150	CGGGGGGACCGAATGAAAAATCAGCATCTCCCTATTTCAACGAGACTGGTCTGATCATTGACACCCATATTATAGATGATTGTTTCAGGCAACCAGAAAACCACGACCTAAAAAGATAATAACACATGTGATAATAAAGACATCGCACACAGCTGCCCAGTAATACATGAAGGCTCTGAGAATCCCGTTCCATTTTAAATCGCCCACTTTCTTCCCCCTACATACTTCATAACCTCGAGCGGCGACTTGTGAACTGACTTGGCAAGCCAACATGGCAGTTGAATGAGAGTTTCATTTTCAACCCTTTAAAACGTTTTGCTTCGGCTACCCTGCCTCTCTTTTGCTTCGGGAAGGAGCAAAAATCTGAGATCGTGGGCGCGCAAGTAAGAATGAGGAATC…	123	C	G
isotig00150	CGGGGGGACCGAATGAAAAATCAGCATCTCCCTATTTCAACGAGACTGGTCTGATCATTGACACCCATATTATAGATGATTGTTTCAGGCAACCAGAAAACCACGACCTAAAAAGATAATAACACATGTGATAATAAAGACATCGCACACAGCTGCCCAGTAATACATGAAGGCTCTGAGAATCCCGTTCCATTTTAAATCGCCCACTTTCTTCCCCCTACATACTTCATAACCTCGAGCGGCGACTTGTGAACTGACTTGGCAAGCCAACATGGCAGTTGAATGAGAGTTTCATTTTCAACCCTTTAAAACGTTTTGCTTCGGCTACCCTGCCTCTCTTTTGCTTCGGGAAGGAGCAAAAATCTGAGATCGTGGGCGCGCAAGTAAGAATGAGGAATC…	208	T	C
isotig00150	CGGGGGGACCGAATGAAAAATCAGCATCTCCCTATTTCAACGAGACTGGTCTGATCATTGACACCCATATTATAGATGATTGTTTCAGGCAACCAGAAAACCACGACCTAAAAAGATAATAACACATGTGATAATAAAGACATCGCACACAGCTGCCCAGTAATACATGAAGGCTCTGAGAATCCCGTTCCATTTTAAATCGCCCACTTTCTTCCCCCTACATACTTCATAACCTCGAGCGGCGACTTGTGAACTGACTTGGCAAGCCAACATGGCAGTTGAATGAGAGTTTCATTTTCAACCCTTTAAAACGTTTTGCTTCGGCTACCCTGCCTCTCTTTTGCTTCGGGAAGGAGCAAAAATCTGAGATCGTGGGCGCGCAAGTAAGAATGAGGAATC…	255	T	C
isotig00150	CGGGGGGACCGAATGAAAAATCAGCATCTCCCTATTTCAACGAGACTGGTCTGATCATTGACACCCATATTATAGATGATTGTTTCAGGCAACCAGAAAACCACGACCTAAAAAGATAATAACACATGTGATAATAAAGACATCGCACACAGCTGCCCAGTAATACATGAAGGCTCTGAGAATCCCGTTCCATTTTAAATCGCCCACTTTCTTCCCCCTACATACTTCATAACCTCGAGCGGCGACTTGTGAACTGACTTGGCAAGCCAACATGGCAGTTGAATGAGAGTTTCATTTTCAACCCTTTAAAACGTTTTGCTTCGGCTACCCTGCCTCTCTTTTGCTTCGGGAAGGAGCAAAAATCTGAGATCGTGGGCGCGCAAGTAAGAATGAGGAATC…	278	G	A
isotig00150	CGGGGGGACCGAATGAAAAATCAGCATCTCCCTATTTCAACGAGACTGGTCTGATCATTGACACCCATATTATAGATGATTGTTTCAGGCAACCAGAAAACCACGACCTAAAAAGATAATAACACATGTGATAATAAAGACATCGCACACAGCTGCCCAGTAATACATGAAGGCTCTGAGAATCCCGTTCCATTTTAAATCGCCCACTTTCTTCCCCCTACATACTTCATAACCTCGAGCGGCGACTTGTGAACTGACTTGGCAAGCCAACATGGCAGTTGAATGAGAGTTTCATTTTCAACCCTTTAAAACGTTTTGCTTCGGCTACCCTGCCTCTCTTTTGCTTCGGGAAGGAGCAAAAATCTGAGATCGTGGGCGCGCAAGTAAGAATGAGGAATC…	976	T	C
isotig00150	CGGGGGGACCGAATGAAAAATCAGCATCTCCCTATTTCAACGAGACTGGTCTGATCATTGACACCCATATTATAGATGATTGTTTCAGGCAACCAGAAAACCACGACCTAAAAAGATAATAACACATGTGATAATAAAGACATCGCACACAGCTGCCCAGTAATACATGAAGGCTCTGAGAATCCCGTTCCATTTTAAATCGCCCACTTTCTTCCCCCTACATACTTCATAACCTCGAGCGGCGACTTGTGAACTGACTTGGCAAGCCAACATGGCAGTTGAATGAGAGTTTCATTTTCAACCCTTTAAAACGTTTTGCTTCGGCTACCCTGCCTCTCTTTTGCTTCGGGAAGGAGCAAAAATCTGAGATCGTGGGCGCGCAAGTAAGAATGAGGAATC…	1264	A	G
isotig00150	CGGGGGGACCGAATGAAAAATCAGCATCTCCCTATTTCAACGAGACTGGTCTGATCATTGACACCCATATTATAGATGATTGTTTCAGGCAACCAGAAAACCACGACCTAAAAAGATAATAACACATGTGATAATAAAGACATCGCACACAGCTGCCCAGTAATACATGAAGGCTCTGAGAATCCCGTTCCATTTTAAATCGCCCACTTTCTTCCCCCTACATACTTCATAACCTCGAGCGGCGACTTGTGAACTGACTTGGCAAGCCAACATGGCAGTTGAATGAGAGTTTCATTTTCAACCCTTTAAAACGTTTTGCTTCGGCTACCCTGCCTCTCTTTTGCTTCGGGAAGGAGCAAAAATCTGAGATCGTGGGCGCGCAAGTAAGAATGAGGAATC…	1275	A	G
isotig00307	ATCCATTTAAAATAATAATAATAAAAATACAGCCCACCGTATTCCAAATCCGCCTTTCTTTTGTGAATACAACCCACCGTTTTTCAATCCCATTTCTTCTATAAATACAACCCACTCTGCTTGATTCCTCATATTTTCTCTAACGTTTGCGAATTCTGATAAGTGCAGCTATTTTTTCAGAAACAGGTCTTCAGTAGTGTTGTTACGCTTTCAAGATGCAGATCTTTGTCAAAACTCTTACCGGCAAGACCATCACTCTTGAAGTCGAGAGCTCTGACACCATTGACAATGTAAAGGCAAAAATCCAGGACAAGGAAGGCATTCCCCCTGACCAACAGCGTTTGATATTTGCTGGAAAGCAGCTGGAAGATGGCCGAACCCTTGCCGATTACAATATCC…	1499	A	T
contig04681	AATACAAGATTTCCAAAGTCTTTTCCAGATTTCGGTGGGATTGGCTTTGTTGGGACTTTACACAACCGTTGGGCCTTTACATAAACCATTGTAAATGCATTGCTCCCCGAGTCCCTTTATTACTCTTCGCTGTTTTTTCTAGGTCTATGCGATATTCAATGTTTGAATTCGAATTTTCAACCACCCCATCCTAATTGACACAAGTTCCAGAACCTAATAAATGGACATCTGCTTTGATCGAAGTTTATTTACAAATATACGGGTTTTCTGGTATTTCCCATGAAACCATATGAGCACTCGTGAATACCCAGTTTATTTGCCTTTTGTTTACAGCTCATTACAAGCATGTAATCTCATTATAATGGGCTGCAGATAAGCATAGGTTGAACCCGAGAATTT…	96	T	C
contig04787	GGGTAAGCAACTACCACGGTTTCTTGGTTGTTTGGAACTGGATGGTTCGTCTCTGAAGGCATTCTGCCTCTTAGCTCTTAGATTTCCAAAGTTGAATGTATGGGAAGTGGTGAAGGTCGAACAGCTCTGCGCTGTTGCTGGGTATCCTCTTTTCCATTGTATTCAAGGGTTCGGTTGACATTTAAATCCAAAGAGTCTAATGCCCATTGAGGTATCTGTAAACTGATTCCTGAGCTCTTAGTTTAAGTCTGTTTTCGGGGCAGACCTTGCGATCCCTTCAGGAAGAGGTTAGATCTGGTTAGCTCCATTTGTTACTAAGTTTACTGTTTGATGCACCGAGACTCACGCTGCTTGTGTATAGCACGGTTTCCTACTTTAGGCGTGCGGCTTTATTTCGTA…	1000	T	C
contig04787	GGGTAAGCAACTACCACGGTTTCTTGGTTGTTTGGAACTGGATGGTTCGTCTCTGAAGGCATTCTGCCTCTTAGCTCTTAGATTTCCAAAGTTGAATGTATGGGAAGTGGTGAAGGTCGAACAGCTCTGCGCTGTTGCTGGGTATCCTCTTTTCCATTGTATTCAAGGGTTCGGTTGACATTTAAATCCAAAGAGTCTAATGCCCATTGAGGTATCTGTAAACTGATTCCTGAGCTCTTAGTTTAAGTCTGTTTTCGGGGCAGACCTTGCGATCCCTTCAGGAAGAGGTTAGATCTGGTTAGCTCCATTTGTTACTAAGTTTACTGTTTGATGCACCGAGACTCACGCTGCTTGTGTATAGCACGGTTTCCTACTTTAGGCGTGCGGCTTTATTTCGTA…	1012	G	A
contig04787	GGGTAAGCAACTACCACGGTTTCTTGGTTGTTTGGAACTGGATGGTTCGTCTCTGAAGGCATTCTGCCTCTTAGCTCTTAGATTTCCAAAGTTGAATGTATGGGAAGTGGTGAAGGTCGAACAGCTCTGCGCTGTTGCTGGGTATCCTCTTTTCCATTGTATTCAAGGGTTCGGTTGACATTTAAATCCAAAGAGTCTAATGCCCATTGAGGTATCTGTAAACTGATTCCTGAGCTCTTAGTTTAAGTCTGTTTTCGGGGCAGACCTTGCGATCCCTTCAGGAAGAGGTTAGATCTGGTTAGCTCCATTTGTTACTAAGTTTACTGTTTGATGCACCGAGACTCACGCTGCTTGTGTATAGCACGGTTTCCTACTTTAGGCGTGCGGCTTTATTTCGTA…	1065	C	A
contig04820	CATCTCAGTGAGCACACGCGAAAGTCATGGCGGTTTCTTCCCTCCTCGAAGCCTGTTAATCTAACATGGCTGCATTTATACAGATTCCCAGCATTGCCATCTCTTTCAATTCCCTGCTCTTTAATATCCCACATTCGTCACAATCACCACCTGAAAATCTTCTGCTTACTCTGTCGTGTTCCCAGAGAACAAGTTCTATAAAATCACTGTGCTTTCCCGCGTTGTTATAGTACTTATTGTAGCTGAGAATGGCTATATACAGTTGTGCAGCAGTAACGAGAACGCCATCAACGTCACTTGGTTGGAGCACATTCGGATACTGTGCTGTCGCTGAAAGAAGTTATGGAAGAAGGCCTCCGCTGCTACGTACCAGATTCGTAGGCCAAGTTTCTGCTGTAT…	977	A	G
isotig00579	GACTTCATCTCTGTATCGAGAAGAGCAGCCCTCCGTAGCGTGTTGTCTTCTTTTTCAAATTGTTCAAGCAGTCTGTGACCGTTGTAGCGTATTTTCTGTTGGTAGCAGTAAATGGCTCCGAAGGCAGATAAGAAACCCGCTGAGAAGAAGCCTGTTGCAGAGAAAGCCCCTGCAGAAAAGAAGCCCGCTGCAAAGGCTGAGAAGAAGCTGCCTAAGGAGGGTGGAGACAAGAAGGGCAAGAAGAAGCACAAGAAGAGCGTTGAGACGTACAAGATATATATCTTCAAGGTTCTCAAACAGGTTCATCCAGATATCGGTATTTCCAGCAAGGCCATGGGAATCATGAATTCCTTCATCAACGATATCTTTGAGAAGTTGGCCAGTGAGGCATCGAAACTC…	237	C	T
isotig00579	GACTTCATCTCTGTATCGAGAAGAGCAGCCCTCCGTAGCGTGTTGTCTTCTTTTTCAAATTGTTCAAGCAGTCTGTGACCGTTGTAGCGTATTTTCTGTTGGTAGCAGTAAATGGCTCCGAAGGCAGATAAGAAACCCGCTGAGAAGAAGCCTGTTGCAGAGAAAGCCCCTGCAGAAAAGAAGCCCGCTGCAAAGGCTGAGAAGAAGCTGCCTAAGGAGGGTGGAGACAAGAAGGGCAAGAAGAAGCACAAGAAGAGCGTTGAGACGTACAAGATATATATCTTCAAGGTTCTCAAACAGGTTCATCCAGATATCGGTATTTCCAGCAAGGCCATGGGAATCATGAATTCCTTCATCAACGATATCTTTGAGAAGTTGGCCAGTGAGGCATCGAAACTC…	526	A	T
isotig00579	GACTTCATCTCTGTATCGAGAAGAGCAGCCCTCCGTAGCGTGTTGTCTTCTTTTTCAAATTGTTCAAGCAGTCTGTGACCGTTGTAGCGTATTTTCTGTTGGTAGCAGTAAATGGCTCCGAAGGCAGATAAGAAACCCGCTGAGAAGAAGCCTGTTGCAGAGAAAGCCCCTGCAGAAAAGAAGCCCGCTGCAAAGGCTGAGAAGAAGCTGCCTAAGGAGGGTGGAGACAAGAAGGGCAAGAAGAAGCACAAGAAGAGCGTTGAGACGTACAAGATATATATCTTCAAGGTTCTCAAACAGGTTCATCCAGATATCGGTATTTCCAGCAAGGCCATGGGAATCATGAATTCCTTCATCAACGATATCTTTGAGAAGTTGGCCAGTGAGGCATCGAAACTC…	605	C	G
isotig00579	GACTTCATCTCTGTATCGAGAAGAGCAGCCCTCCGTAGCGTGTTGTCTTCTTTTTCAAATTGTTCAAGCAGTCTGTGACCGTTGTAGCGTATTTTCTGTTGGTAGCAGTAAATGGCTCCGAAGGCAGATAAGAAACCCGCTGAGAAGAAGCCTGTTGCAGAGAAAGCCCCTGCAGAAAAGAAGCCCGCTGCAAAGGCTGAGAAGAAGCTGCCTAAGGAGGGTGGAGACAAGAAGGGCAAGAAGAAGCACAAGAAGAGCGTTGAGACGTACAAGATATATATCTTCAAGGTTCTCAAACAGGTTCATCCAGATATCGGTATTTCCAGCAAGGCCATGGGAATCATGAATTCCTTCATCAACGATATCTTTGAGAAGTTGGCCAGTGAGGCATCGAAACTC…	618	T	G
isotig00579	GACTTCATCTCTGTATCGAGAAGAGCAGCCCTCCGTAGCGTGTTGTCTTCTTTTTCAAATTGTTCAAGCAGTCTGTGACCGTTGTAGCGTATTTTCTGTTGGTAGCAGTAAATGGCTCCGAAGGCAGATAAGAAACCCGCTGAGAAGAAGCCTGTTGCAGAGAAAGCCCCTGCAGAAAAGAAGCCCGCTGCAAAGGCTGAGAAGAAGCTGCCTAAGGAGGGTGGAGACAAGAAGGGCAAGAAGAAGCACAAGAAGAGCGTTGAGACGTACAAGATATATATCTTCAAGGTTCTCAAACAGGTTCATCCAGATATCGGTATTTCCAGCAAGGCCATGGGAATCATGAATTCCTTCATCAACGATATCTTTGAGAAGTTGGCCAGTGAGGCATCGAAACTC…	770	T	C
isotig00579	GACTTCATCTCTGTATCGAGAAGAGCAGCCCTCCGTAGCGTGTTGTCTTCTTTTTCAAATTGTTCAAGCAGTCTGTGACCGTTGTAGCGTATTTTCTGTTGGTAGCAGTAAATGGCTCCGAAGGCAGATAAGAAACCCGCTGAGAAGAAGCCTGTTGCAGAGAAAGCCCCTGCAGAAAAGAAGCCCGCTGCAAAGGCTGAGAAGAAGCTGCCTAAGGAGGGTGGAGACAAGAAGGGCAAGAAGAAGCACAAGAAGAGCGTTGAGACGTACAAGATATATATCTTCAAGGTTCTCAAACAGGTTCATCCAGATATCGGTATTTCCAGCAAGGCCATGGGAATCATGAATTCCTTCATCAACGATATCTTTGAGAAGTTGGCCAGTGAGGCATCGAAACTC…	860	A	G
isotig00579	GACTTCATCTCTGTATCGAGAAGAGCAGCCCTCCGTAGCGTGTTGTCTTCTTTTTCAAATTGTTCAAGCAGTCTGTGACCGTTGTAGCGTATTTTCTGTTGGTAGCAGTAAATGGCTCCGAAGGCAGATAAGAAACCCGCTGAGAAGAAGCCTGTTGCAGAGAAAGCCCCTGCAGAAAAGAAGCCCGCTGCAAAGGCTGAGAAGAAGCTGCCTAAGGAGGGTGGAGACAAGAAGGGCAAGAAGAAGCACAAGAAGAGCGTTGAGACGTACAAGATATATATCTTCAAGGTTCTCAAACAGGTTCATCCAGATATCGGTATTTCCAGCAAGGCCATGGGAATCATGAATTCCTTCATCAACGATATCTTTGAGAAGTTGGCCAGTGAGGCATCGAAACTC…	940	A	G
isotig00579	GACTTCATCTCTGTATCGAGAAGAGCAGCCCTCCGTAGCGTGTTGTCTTCTTTTTCAAATTGTTCAAGCAGTCTGTGACCGTTGTAGCGTATTTTCTGTTGGTAGCAGTAAATGGCTCCGAAGGCAGATAAGAAACCCGCTGAGAAGAAGCCTGTTGCAGAGAAAGCCCCTGCAGAAAAGAAGCCCGCTGCAAAGGCTGAGAAGAAGCTGCCTAAGGAGGGTGGAGACAAGAAGGGCAAGAAGAAGCACAAGAAGAGCGTTGAGACGTACAAGATATATATCTTCAAGGTTCTCAAACAGGTTCATCCAGATATCGGTATTTCCAGCAAGGCCATGGGAATCATGAATTCCTTCATCAACGATATCTTTGAGAAGTTGGCCAGTGAGGCATCGAAACTC…	995	A	C
isotig00605	CTAGCATCCACATAAATCTTCATATTCATAGCAACCACTTCACCATCAGTCAGCCAATCTTGAGAGCAGAAAGTCATGAAAATGGATATTTGCCTTCCAACACAACAAAAGAAGACATCATAATGAGCACAGAACACAGTAATCCATTTTCAAGAAGGCAGACAACATTGTCTCTTTTAACCTAGCAATTAAATAAATGGCTGTTTTTATGCAGCTACTCTTAACACTTAAAAAACAGCTAAAATTATGTGCTCCCAATAATGAATACTGAAAGTTGCCTCGCAAAAATCAGTGCTCAATAAAATTATCTGAAAAATCCAATACATAACAAAGGATTGCAAATCAACATTCAAAATTAATCCTTGAAGTTAACCTAACCTGCAAAAAGTCTATATGCAG…	260	A	G
isotig00605	CTAGCATCCACATAAATCTTCATATTCATAGCAACCACTTCACCATCAGTCAGCCAATCTTGAGAGCAGAAAGTCATGAAAATGGATATTTGCCTTCCAACACAACAAAAGAAGACATCATAATGAGCACAGAACACAGTAATCCATTTTCAAGAAGGCAGACAACATTGTCTCTTTTAACCTAGCAATTAAATAAATGGCTGTTTTTATGCAGCTACTCTTAACACTTAAAAAACAGCTAAAATTATGTGCTCCCAATAATGAATACTGAAAGTTGCCTCGCAAAAATCAGTGCTCAATAAAATTATCTGAAAAATCCAATACATAACAAAGGATTGCAAATCAACATTCAAAATTAATCCTTGAAGTTAACCTAACCTGCAAAAAGTCTATATGCAG…	402	T	A
isotig00605	CTAGCATCCACATAAATCTTCATATTCATAGCAACCACTTCACCATCAGTCAGCCAATCTTGAGAGCAGAAAGTCATGAAAATGGATATTTGCCTTCCAACACAACAAAAGAAGACATCATAATGAGCACAGAACACAGTAATCCATTTTCAAGAAGGCAGACAACATTGTCTCTTTTAACCTAGCAATTAAATAAATGGCTGTTTTTATGCAGCTACTCTTAACACTTAAAAAACAGCTAAAATTATGTGCTCCCAATAATGAATACTGAAAGTTGCCTCGCAAAAATCAGTGCTCAATAAAATTATCTGAAAAATCCAATACATAACAAAGGATTGCAAATCAACATTCAAAATTAATCCTTGAAGTTAACCTAACCTGCAAAAAGTCTATATGCAG…	405	G	A
isotig00605	CTAGCATCCACATAAATCTTCATATTCATAGCAACCACTTCACCATCAGTCAGCCAATCTTGAGAGCAGAAAGTCATGAAAATGGATATTTGCCTTCCAACACAACAAAAGAAGACATCATAATGAGCACAGAACACAGTAATCCATTTTCAAGAAGGCAGACAACATTGTCTCTTTTAACCTAGCAATTAAATAAATGGCTGTTTTTATGCAGCTACTCTTAACACTTAAAAAACAGCTAAAATTATGTGCTCCCAATAATGAATACTGAAAGTTGCCTCGCAAAAATCAGTGCTCAATAAAATTATCTGAAAAATCCAATACATAACAAAGGATTGCAAATCAACATTCAAAATTAATCCTTGAAGTTAACCTAACCTGCAAAAAGTCTATATGCAG…	444	C	T
isotig00845	GGTGGCCACACTCGATTCTCACAGGATATTTTGTTATGTGCGCATTGTTGTTTTCACCCCGGCCTACAACCATACAAGTGGTGCACATACCATCTGACCTGCAATGGCATCCTTCCACTGATAAAAAAAAAACATTGTACATGCACAACCAACAACTCCCTTAGCGATGTTGTAGCTTAACGTTGAGCTATGCATGGTCATTGTTTTGCATTGTCCTATTATGGTGGAGGGCCAGAGGAGCATCGGTGGTGGTGGTAAAGCCAAGTCACCTTCTTGTCTCCTAGCTCTTCATCCATTTATCACAGTGTGCTGCTTCTTTTCCTGGAACTAGCAGGGCTCCTGATGCCTCTGCTGACATAAAAAACGCAGGCTGTAGCCGTTACATCGTTATGGCGTTTG…	591	G	A
isotig00845	GGTGGCCACACTCGATTCTCACAGGATATTTTGTTATGTGCGCATTGTTGTTTTCACCCCGGCCTACAACCATACAAGTGGTGCACATACCATCTGACCTGCAATGGCATCCTTCCACTGATAAAAAAAAAACATTGTACATGCACAACCAACAACTCCCTTAGCGATGTTGTAGCTTAACGTTGAGCTATGCATGGTCATTGTTTTGCATTGTCCTATTATGGTGGAGGGCCAGAGGAGCATCGGTGGTGGTGGTAAAGCCAAGTCACCTTCTTGTCTCCTAGCTCTTCATCCATTTATCACAGTGTGCTGCTTCTTTTCCTGGAACTAGCAGGGCTCCTGATGCCTCTGCTGACATAAAAAACGCAGGCTGTAGCCGTTACATCGTTATGGCGTTTG…	917	T	C
isotig00845	GGTGGCCACACTCGATTCTCACAGGATATTTTGTTATGTGCGCATTGTTGTTTTCACCCCGGCCTACAACCATACAAGTGGTGCACATACCATCTGACCTGCAATGGCATCCTTCCACTGATAAAAAAAAAACATTGTACATGCACAACCAACAACTCCCTTAGCGATGTTGTAGCTTAACGTTGAGCTATGCATGGTCATTGTTTTGCATTGTCCTATTATGGTGGAGGGCCAGAGGAGCATCGGTGGTGGTGGTAAAGCCAAGTCACCTTCTTGTCTCCTAGCTCTTCATCCATTTATCACAGTGTGCTGCTTCTTTTCCTGGAACTAGCAGGGCTCCTGATGCCTCTGCTGACATAAAAAACGCAGGCTGTAGCCGTTACATCGTTATGGCGTTTG…	1184	C	T
isotig00845	GGTGGCCACACTCGATTCTCACAGGATATTTTGTTATGTGCGCATTGTTGTTTTCACCCCGGCCTACAACCATACAAGTGGTGCACATACCATCTGACCTGCAATGGCATCCTTCCACTGATAAAAAAAAAACATTGTACATGCACAACCAACAACTCCCTTAGCGATGTTGTAGCTTAACGTTGAGCTATGCATGGTCATTGTTTTGCATTGTCCTATTATGGTGGAGGGCCAGAGGAGCATCGGTGGTGGTGGTAAAGCCAAGTCACCTTCTTGTCTCCTAGCTCTTCATCCATTTATCACAGTGTGCTGCTTCTTTTCCTGGAACTAGCAGGGCTCCTGATGCCTCTGCTGACATAAAAAACGCAGGCTGTAGCCGTTACATCGTTATGGCGTTTG…	1229	T	C
isotig00845	GGTGGCCACACTCGATTCTCACAGGATATTTTGTTATGTGCGCATTGTTGTTTTCACCCCGGCCTACAACCATACAAGTGGTGCACATACCATCTGACCTGCAATGGCATCCTTCCACTGATAAAAAAAAAACATTGTACATGCACAACCAACAACTCCCTTAGCGATGTTGTAGCTTAACGTTGAGCTATGCATGGTCATTGTTTTGCATTGTCCTATTATGGTGGAGGGCCAGAGGAGCATCGGTGGTGGTGGTAAAGCCAAGTCACCTTCTTGTCTCCTAGCTCTTCATCCATTTATCACAGTGTGCTGCTTCTTTTCCTGGAACTAGCAGGGCTCCTGATGCCTCTGCTGACATAAAAAACGCAGGCTGTAGCCGTTACATCGTTATGGCGTTTG…	2345	C	T
isotig00845	GGTGGCCACACTCGATTCTCACAGGATATTTTGTTATGTGCGCATTGTTGTTTTCACCCCGGCCTACAACCATACAAGTGGTGCACATACCATCTGACCTGCAATGGCATCCTTCCACTGATAAAAAAAAAACATTGTACATGCACAACCAACAACTCCCTTAGCGATGTTGTAGCTTAACGTTGAGCTATGCATGGTCATTGTTTTGCATTGTCCTATTATGGTGGAGGGCCAGAGGAGCATCGGTGGTGGTGGTAAAGCCAAGTCACCTTCTTGTCTCCTAGCTCTTCATCCATTTATCACAGTGTGCTGCTTCTTTTCCTGGAACTAGCAGGGCTCCTGATGCCTCTGCTGACATAAAAAACGCAGGCTGTAGCCGTTACATCGTTATGGCGTTTG…	3185	G	T
isotig00845	GGTGGCCACACTCGATTCTCACAGGATATTTTGTTATGTGCGCATTGTTGTTTTCACCCCGGCCTACAACCATACAAGTGGTGCACATACCATCTGACCTGCAATGGCATCCTTCCACTGATAAAAAAAAAACATTGTACATGCACAACCAACAACTCCCTTAGCGATGTTGTAGCTTAACGTTGAGCTATGCATGGTCATTGTTTTGCATTGTCCTATTATGGTGGAGGGCCAGAGGAGCATCGGTGGTGGTGGTAAAGCCAAGTCACCTTCTTGTCTCCTAGCTCTTCATCCATTTATCACAGTGTGCTGCTTCTTTTCCTGGAACTAGCAGGGCTCCTGATGCCTCTGCTGACATAAAAAACGCAGGCTGTAGCCGTTACATCGTTATGGCGTTTG…	4388	C	T
isotig00931	GATACCCTTGTGGGCTCTCCCAGTGATTCTGCTACGTTTGGAAGGCTCAACTGTACGAAAGAAAAGCACAAAAGCACGCTTCGTTTCTGAAAGAAAAGCACAAAAGCTAATAAAACAGAAACGTTTGGTAGATATAGGTATTTTCTGTAAGCCTTTGAAACCTTTTGGCAATGGCACCAGAGTTTGATATTTCAAGTGCGTCAAACAAAGAATGCATGTTACAGAGAATTGACGGGTGGTTGACAGCAACGGTGGAGGTCACAAAGCATCGAGGGTTGATTGTCAAGCAGTAAACCCTTGCTTTTAACCCTAACTTTGGATATCACATGCATACGAAGAGACTACGGAGGGTTTGATTCCGATGCACAACACAAAGTTTGAGGGAGGGAGGGGTGCCAT…	205	A	C
isotig00931	GATACCCTTGTGGGCTCTCCCAGTGATTCTGCTACGTTTGGAAGGCTCAACTGTACGAAAGAAAAGCACAAAAGCACGCTTCGTTTCTGAAAGAAAAGCACAAAAGCTAATAAAACAGAAACGTTTGGTAGATATAGGTATTTTCTGTAAGCCTTTGAAACCTTTTGGCAATGGCACCAGAGTTTGATATTTCAAGTGCGTCAAACAAAGAATGCATGTTACAGAGAATTGACGGGTGGTTGACAGCAACGGTGGAGGTCACAAAGCATCGAGGGTTGATTGTCAAGCAGTAAACCCTTGCTTTTAACCCTAACTTTGGATATCACATGCATACGAAGAGACTACGGAGGGTTTGATTCCGATGCACAACACAAAGTTTGAGGGAGGGAGGGGTGCCAT…	243	A	G
isotig00931	GATACCCTTGTGGGCTCTCCCAGTGATTCTGCTACGTTTGGAAGGCTCAACTGTACGAAAGAAAAGCACAAAAGCACGCTTCGTTTCTGAAAGAAAAGCACAAAAGCTAATAAAACAGAAACGTTTGGTAGATATAGGTATTTTCTGTAAGCCTTTGAAACCTTTTGGCAATGGCACCAGAGTTTGATATTTCAAGTGCGTCAAACAAAGAATGCATGTTACAGAGAATTGACGGGTGGTTGACAGCAACGGTGGAGGTCACAAAGCATCGAGGGTTGATTGTCAAGCAGTAAACCCTTGCTTTTAACCCTAACTTTGGATATCACATGCATACGAAGAGACTACGGAGGGTTTGATTCCGATGCACAACACAAAGTTTGAGGGAGGGAGGGGTGCCAT…	251	G	A
isotig00931	GATACCCTTGTGGGCTCTCCCAGTGATTCTGCTACGTTTGGAAGGCTCAACTGTACGAAAGAAAAGCACAAAAGCACGCTTCGTTTCTGAAAGAAAAGCACAAAAGCTAATAAAACAGAAACGTTTGGTAGATATAGGTATTTTCTGTAAGCCTTTGAAACCTTTTGGCAATGGCACCAGAGTTTGATATTTCAAGTGCGTCAAACAAAGAATGCATGTTACAGAGAATTGACGGGTGGTTGACAGCAACGGTGGAGGTCACAAAGCATCGAGGGTTGATTGTCAAGCAGTAAACCCTTGCTTTTAACCCTAACTTTGGATATCACATGCATACGAAGAGACTACGGAGGGTTTGATTCCGATGCACAACACAAAGTTTGAGGGAGGGAGGGGTGCCAT…	255	G	T
isotig00931	GATACCCTTGTGGGCTCTCCCAGTGATTCTGCTACGTTTGGAAGGCTCAACTGTACGAAAGAAAAGCACAAAAGCACGCTTCGTTTCTGAAAGAAAAGCACAAAAGCTAATAAAACAGAAACGTTTGGTAGATATAGGTATTTTCTGTAAGCCTTTGAAACCTTTTGGCAATGGCACCAGAGTTTGATATTTCAAGTGCGTCAAACAAAGAATGCATGTTACAGAGAATTGACGGGTGGTTGACAGCAACGGTGGAGGTCACAAAGCATCGAGGGTTGATTGTCAAGCAGTAAACCCTTGCTTTTAACCCTAACTTTGGATATCACATGCATACGAAGAGACTACGGAGGGTTTGATTCCGATGCACAACACAAAGTTTGAGGGAGGGAGGGGTGCCAT…	256	A	T
isotig00931	GATACCCTTGTGGGCTCTCCCAGTGATTCTGCTACGTTTGGAAGGCTCAACTGTACGAAAGAAAAGCACAAAAGCACGCTTCGTTTCTGAAAGAAAAGCACAAAAGCTAATAAAACAGAAACGTTTGGTAGATATAGGTATTTTCTGTAAGCCTTTGAAACCTTTTGGCAATGGCACCAGAGTTTGATATTTCAAGTGCGTCAAACAAAGAATGCATGTTACAGAGAATTGACGGGTGGTTGACAGCAACGGTGGAGGTCACAAAGCATCGAGGGTTGATTGTCAAGCAGTAAACCCTTGCTTTTAACCCTAACTTTGGATATCACATGCATACGAAGAGACTACGGAGGGTTTGATTCCGATGCACAACACAAAGTTTGAGGGAGGGAGGGGTGCCAT…	259	T	G
isotig00931	GATACCCTTGTGGGCTCTCCCAGTGATTCTGCTACGTTTGGAAGGCTCAACTGTACGAAAGAAAAGCACAAAAGCACGCTTCGTTTCTGAAAGAAAAGCACAAAAGCTAATAAAACAGAAACGTTTGGTAGATATAGGTATTTTCTGTAAGCCTTTGAAACCTTTTGGCAATGGCACCAGAGTTTGATATTTCAAGTGCGTCAAACAAAGAATGCATGTTACAGAGAATTGACGGGTGGTTGACAGCAACGGTGGAGGTCACAAAGCATCGAGGGTTGATTGTCAAGCAGTAAACCCTTGCTTTTAACCCTAACTTTGGATATCACATGCATACGAAGAGACTACGGAGGGTTTGATTCCGATGCACAACACAAAGTTTGAGGGAGGGAGGGGTGCCAT…	262	C	G
isotig00931	GATACCCTTGTGGGCTCTCCCAGTGATTCTGCTACGTTTGGAAGGCTCAACTGTACGAAAGAAAAGCACAAAAGCACGCTTCGTTTCTGAAAGAAAAGCACAAAAGCTAATAAAACAGAAACGTTTGGTAGATATAGGTATTTTCTGTAAGCCTTTGAAACCTTTTGGCAATGGCACCAGAGTTTGATATTTCAAGTGCGTCAAACAAAGAATGCATGTTACAGAGAATTGACGGGTGGTTGACAGCAACGGTGGAGGTCACAAAGCATCGAGGGTTGATTGTCAAGCAGTAAACCCTTGCTTTTAACCCTAACTTTGGATATCACATGCATACGAAGAGACTACGGAGGGTTTGATTCCGATGCACAACACAAAGTTTGAGGGAGGGAGGGGTGCCAT…	311	T	A
isotig00931	GATACCCTTGTGGGCTCTCCCAGTGATTCTGCTACGTTTGGAAGGCTCAACTGTACGAAAGAAAAGCACAAAAGCACGCTTCGTTTCTGAAAGAAAAGCACAAAAGCTAATAAAACAGAAACGTTTGGTAGATATAGGTATTTTCTGTAAGCCTTTGAAACCTTTTGGCAATGGCACCAGAGTTTGATATTTCAAGTGCGTCAAACAAAGAATGCATGTTACAGAGAATTGACGGGTGGTTGACAGCAACGGTGGAGGTCACAAAGCATCGAGGGTTGATTGTCAAGCAGTAAACCCTTGCTTTTAACCCTAACTTTGGATATCACATGCATACGAAGAGACTACGGAGGGTTTGATTCCGATGCACAACACAAAGTTTGAGGGAGGGAGGGGTGCCAT…	322	A	G
isotig00931	GATACCCTTGTGGGCTCTCCCAGTGATTCTGCTACGTTTGGAAGGCTCAACTGTACGAAAGAAAAGCACAAAAGCACGCTTCGTTTCTGAAAGAAAAGCACAAAAGCTAATAAAACAGAAACGTTTGGTAGATATAGGTATTTTCTGTAAGCCTTTGAAACCTTTTGGCAATGGCACCAGAGTTTGATATTTCAAGTGCGTCAAACAAAGAATGCATGTTACAGAGAATTGACGGGTGGTTGACAGCAACGGTGGAGGTCACAAAGCATCGAGGGTTGATTGTCAAGCAGTAAACCCTTGCTTTTAACCCTAACTTTGGATATCACATGCATACGAAGAGACTACGGAGGGTTTGATTCCGATGCACAACACAAAGTTTGAGGGAGGGAGGGGTGCCAT…	326	C	G
isotig00931	GATACCCTTGTGGGCTCTCCCAGTGATTCTGCTACGTTTGGAAGGCTCAACTGTACGAAAGAAAAGCACAAAAGCACGCTTCGTTTCTGAAAGAAAAGCACAAAAGCTAATAAAACAGAAACGTTTGGTAGATATAGGTATTTTCTGTAAGCCTTTGAAACCTTTTGGCAATGGCACCAGAGTTTGATATTTCAAGTGCGTCAAACAAAGAATGCATGTTACAGAGAATTGACGGGTGGTTGACAGCAACGGTGGAGGTCACAAAGCATCGAGGGTTGATTGTCAAGCAGTAAACCCTTGCTTTTAACCCTAACTTTGGATATCACATGCATACGAAGAGACTACGGAGGGTTTGATTCCGATGCACAACACAAAGTTTGAGGGAGGGAGGGGTGCCAT…	329	G	T
isotig00931	GATACCCTTGTGGGCTCTCCCAGTGATTCTGCTACGTTTGGAAGGCTCAACTGTACGAAAGAAAAGCACAAAAGCACGCTTCGTTTCTGAAAGAAAAGCACAAAAGCTAATAAAACAGAAACGTTTGGTAGATATAGGTATTTTCTGTAAGCCTTTGAAACCTTTTGGCAATGGCACCAGAGTTTGATATTTCAAGTGCGTCAAACAAAGAATGCATGTTACAGAGAATTGACGGGTGGTTGACAGCAACGGTGGAGGTCACAAAGCATCGAGGGTTGATTGTCAAGCAGTAAACCCTTGCTTTTAACCCTAACTTTGGATATCACATGCATACGAAGAGACTACGGAGGGTTTGATTCCGATGCACAACACAAAGTTTGAGGGAGGGAGGGGTGCCAT…	344	A	C
isotig00931	GATACCCTTGTGGGCTCTCCCAGTGATTCTGCTACGTTTGGAAGGCTCAACTGTACGAAAGAAAAGCACAAAAGCACGCTTCGTTTCTGAAAGAAAAGCACAAAAGCTAATAAAACAGAAACGTTTGGTAGATATAGGTATTTTCTGTAAGCCTTTGAAACCTTTTGGCAATGGCACCAGAGTTTGATATTTCAAGTGCGTCAAACAAAGAATGCATGTTACAGAGAATTGACGGGTGGTTGACAGCAACGGTGGAGGTCACAAAGCATCGAGGGTTGATTGTCAAGCAGTAAACCCTTGCTTTTAACCCTAACTTTGGATATCACATGCATACGAAGAGACTACGGAGGGTTTGATTCCGATGCACAACACAAAGTTTGAGGGAGGGAGGGGTGCCAT…	425	A	G
isotig00931	GATACCCTTGTGGGCTCTCCCAGTGATTCTGCTACGTTTGGAAGGCTCAACTGTACGAAAGAAAAGCACAAAAGCACGCTTCGTTTCTGAAAGAAAAGCACAAAAGCTAATAAAACAGAAACGTTTGGTAGATATAGGTATTTTCTGTAAGCCTTTGAAACCTTTTGGCAATGGCACCAGAGTTTGATATTTCAAGTGCGTCAAACAAAGAATGCATGTTACAGAGAATTGACGGGTGGTTGACAGCAACGGTGGAGGTCACAAAGCATCGAGGGTTGATTGTCAAGCAGTAAACCCTTGCTTTTAACCCTAACTTTGGATATCACATGCATACGAAGAGACTACGGAGGGTTTGATTCCGATGCACAACACAAAGTTTGAGGGAGGGAGGGGTGCCAT…	429	A	T
isotig00931	GATACCCTTGTGGGCTCTCCCAGTGATTCTGCTACGTTTGGAAGGCTCAACTGTACGAAAGAAAAGCACAAAAGCACGCTTCGTTTCTGAAAGAAAAGCACAAAAGCTAATAAAACAGAAACGTTTGGTAGATATAGGTATTTTCTGTAAGCCTTTGAAACCTTTTGGCAATGGCACCAGAGTTTGATATTTCAAGTGCGTCAAACAAAGAATGCATGTTACAGAGAATTGACGGGTGGTTGACAGCAACGGTGGAGGTCACAAAGCATCGAGGGTTGATTGTCAAGCAGTAAACCCTTGCTTTTAACCCTAACTTTGGATATCACATGCATACGAAGAGACTACGGAGGGTTTGATTCCGATGCACAACACAAAGTTTGAGGGAGGGAGGGGTGCCAT…	472	A	G
isotig00931	GATACCCTTGTGGGCTCTCCCAGTGATTCTGCTACGTTTGGAAGGCTCAACTGTACGAAAGAAAAGCACAAAAGCACGCTTCGTTTCTGAAAGAAAAGCACAAAAGCTAATAAAACAGAAACGTTTGGTAGATATAGGTATTTTCTGTAAGCCTTTGAAACCTTTTGGCAATGGCACCAGAGTTTGATATTTCAAGTGCGTCAAACAAAGAATGCATGTTACAGAGAATTGACGGGTGGTTGACAGCAACGGTGGAGGTCACAAAGCATCGAGGGTTGATTGTCAAGCAGTAAACCCTTGCTTTTAACCCTAACTTTGGATATCACATGCATACGAAGAGACTACGGAGGGTTTGATTCCGATGCACAACACAAAGTTTGAGGGAGGGAGGGGTGCCAT…	486	C	T
isotig00931	GATACCCTTGTGGGCTCTCCCAGTGATTCTGCTACGTTTGGAAGGCTCAACTGTACGAAAGAAAAGCACAAAAGCACGCTTCGTTTCTGAAAGAAAAGCACAAAAGCTAATAAAACAGAAACGTTTGGTAGATATAGGTATTTTCTGTAAGCCTTTGAAACCTTTTGGCAATGGCACCAGAGTTTGATATTTCAAGTGCGTCAAACAAAGAATGCATGTTACAGAGAATTGACGGGTGGTTGACAGCAACGGTGGAGGTCACAAAGCATCGAGGGTTGATTGTCAAGCAGTAAACCCTTGCTTTTAACCCTAACTTTGGATATCACATGCATACGAAGAGACTACGGAGGGTTTGATTCCGATGCACAACACAAAGTTTGAGGGAGGGAGGGGTGCCAT…	519	A	T
isotig00931	GATACCCTTGTGGGCTCTCCCAGTGATTCTGCTACGTTTGGAAGGCTCAACTGTACGAAAGAAAAGCACAAAAGCACGCTTCGTTTCTGAAAGAAAAGCACAAAAGCTAATAAAACAGAAACGTTTGGTAGATATAGGTATTTTCTGTAAGCCTTTGAAACCTTTTGGCAATGGCACCAGAGTTTGATATTTCAAGTGCGTCAAACAAAGAATGCATGTTACAGAGAATTGACGGGTGGTTGACAGCAACGGTGGAGGTCACAAAGCATCGAGGGTTGATTGTCAAGCAGTAAACCCTTGCTTTTAACCCTAACTTTGGATATCACATGCATACGAAGAGACTACGGAGGGTTTGATTCCGATGCACAACACAAAGTTTGAGGGAGGGAGGGGTGCCAT…	530	G	C
isotig00931	GATACCCTTGTGGGCTCTCCCAGTGATTCTGCTACGTTTGGAAGGCTCAACTGTACGAAAGAAAAGCACAAAAGCACGCTTCGTTTCTGAAAGAAAAGCACAAAAGCTAATAAAACAGAAACGTTTGGTAGATATAGGTATTTTCTGTAAGCCTTTGAAACCTTTTGGCAATGGCACCAGAGTTTGATATTTCAAGTGCGTCAAACAAAGAATGCATGTTACAGAGAATTGACGGGTGGTTGACAGCAACGGTGGAGGTCACAAAGCATCGAGGGTTGATTGTCAAGCAGTAAACCCTTGCTTTTAACCCTAACTTTGGATATCACATGCATACGAAGAGACTACGGAGGGTTTGATTCCGATGCACAACACAAAGTTTGAGGGAGGGAGGGGTGCCAT…	562	T	C
isotig00931	GATACCCTTGTGGGCTCTCCCAGTGATTCTGCTACGTTTGGAAGGCTCAACTGTACGAAAGAAAAGCACAAAAGCACGCTTCGTTTCTGAAAGAAAAGCACAAAAGCTAATAAAACAGAAACGTTTGGTAGATATAGGTATTTTCTGTAAGCCTTTGAAACCTTTTGGCAATGGCACCAGAGTTTGATATTTCAAGTGCGTCAAACAAAGAATGCATGTTACAGAGAATTGACGGGTGGTTGACAGCAACGGTGGAGGTCACAAAGCATCGAGGGTTGATTGTCAAGCAGTAAACCCTTGCTTTTAACCCTAACTTTGGATATCACATGCATACGAAGAGACTACGGAGGGTTTGATTCCGATGCACAACACAAAGTTTGAGGGAGGGAGGGGTGCCAT…	564	G	C
isotig00931	GATACCCTTGTGGGCTCTCCCAGTGATTCTGCTACGTTTGGAAGGCTCAACTGTACGAAAGAAAAGCACAAAAGCACGCTTCGTTTCTGAAAGAAAAGCACAAAAGCTAATAAAACAGAAACGTTTGGTAGATATAGGTATTTTCTGTAAGCCTTTGAAACCTTTTGGCAATGGCACCAGAGTTTGATATTTCAAGTGCGTCAAACAAAGAATGCATGTTACAGAGAATTGACGGGTGGTTGACAGCAACGGTGGAGGTCACAAAGCATCGAGGGTTGATTGTCAAGCAGTAAACCCTTGCTTTTAACCCTAACTTTGGATATCACATGCATACGAAGAGACTACGGAGGGTTTGATTCCGATGCACAACACAAAGTTTGAGGGAGGGAGGGGTGCCAT…	590	G	A
isotig00931	GATACCCTTGTGGGCTCTCCCAGTGATTCTGCTACGTTTGGAAGGCTCAACTGTACGAAAGAAAAGCACAAAAGCACGCTTCGTTTCTGAAAGAAAAGCACAAAAGCTAATAAAACAGAAACGTTTGGTAGATATAGGTATTTTCTGTAAGCCTTTGAAACCTTTTGGCAATGGCACCAGAGTTTGATATTTCAAGTGCGTCAAACAAAGAATGCATGTTACAGAGAATTGACGGGTGGTTGACAGCAACGGTGGAGGTCACAAAGCATCGAGGGTTGATTGTCAAGCAGTAAACCCTTGCTTTTAACCCTAACTTTGGATATCACATGCATACGAAGAGACTACGGAGGGTTTGATTCCGATGCACAACACAAAGTTTGAGGGAGGGAGGGGTGCCAT…	662	T	C
isotig00931	GATACCCTTGTGGGCTCTCCCAGTGATTCTGCTACGTTTGGAAGGCTCAACTGTACGAAAGAAAAGCACAAAAGCACGCTTCGTTTCTGAAAGAAAAGCACAAAAGCTAATAAAACAGAAACGTTTGGTAGATATAGGTATTTTCTGTAAGCCTTTGAAACCTTTTGGCAATGGCACCAGAGTTTGATATTTCAAGTGCGTCAAACAAAGAATGCATGTTACAGAGAATTGACGGGTGGTTGACAGCAACGGTGGAGGTCACAAAGCATCGAGGGTTGATTGTCAAGCAGTAAACCCTTGCTTTTAACCCTAACTTTGGATATCACATGCATACGAAGAGACTACGGAGGGTTTGATTCCGATGCACAACACAAAGTTTGAGGGAGGGAGGGGTGCCAT…	674	C	T
isotig00931	GATACCCTTGTGGGCTCTCCCAGTGATTCTGCTACGTTTGGAAGGCTCAACTGTACGAAAGAAAAGCACAAAAGCACGCTTCGTTTCTGAAAGAAAAGCACAAAAGCTAATAAAACAGAAACGTTTGGTAGATATAGGTATTTTCTGTAAGCCTTTGAAACCTTTTGGCAATGGCACCAGAGTTTGATATTTCAAGTGCGTCAAACAAAGAATGCATGTTACAGAGAATTGACGGGTGGTTGACAGCAACGGTGGAGGTCACAAAGCATCGAGGGTTGATTGTCAAGCAGTAAACCCTTGCTTTTAACCCTAACTTTGGATATCACATGCATACGAAGAGACTACGGAGGGTTTGATTCCGATGCACAACACAAAGTTTGAGGGAGGGAGGGGTGCCAT…	682	G	C
isotig00931	GATACCCTTGTGGGCTCTCCCAGTGATTCTGCTACGTTTGGAAGGCTCAACTGTACGAAAGAAAAGCACAAAAGCACGCTTCGTTTCTGAAAGAAAAGCACAAAAGCTAATAAAACAGAAACGTTTGGTAGATATAGGTATTTTCTGTAAGCCTTTGAAACCTTTTGGCAATGGCACCAGAGTTTGATATTTCAAGTGCGTCAAACAAAGAATGCATGTTACAGAGAATTGACGGGTGGTTGACAGCAACGGTGGAGGTCACAAAGCATCGAGGGTTGATTGTCAAGCAGTAAACCCTTGCTTTTAACCCTAACTTTGGATATCACATGCATACGAAGAGACTACGGAGGGTTTGATTCCGATGCACAACACAAAGTTTGAGGGAGGGAGGGGTGCCAT…	688	A	C
isotig00931	GATACCCTTGTGGGCTCTCCCAGTGATTCTGCTACGTTTGGAAGGCTCAACTGTACGAAAGAAAAGCACAAAAGCACGCTTCGTTTCTGAAAGAAAAGCACAAAAGCTAATAAAACAGAAACGTTTGGTAGATATAGGTATTTTCTGTAAGCCTTTGAAACCTTTTGGCAATGGCACCAGAGTTTGATATTTCAAGTGCGTCAAACAAAGAATGCATGTTACAGAGAATTGACGGGTGGTTGACAGCAACGGTGGAGGTCACAAAGCATCGAGGGTTGATTGTCAAGCAGTAAACCCTTGCTTTTAACCCTAACTTTGGATATCACATGCATACGAAGAGACTACGGAGGGTTTGATTCCGATGCACAACACAAAGTTTGAGGGAGGGAGGGGTGCCAT…	709	A	G
isotig00931	GATACCCTTGTGGGCTCTCCCAGTGATTCTGCTACGTTTGGAAGGCTCAACTGTACGAAAGAAAAGCACAAAAGCACGCTTCGTTTCTGAAAGAAAAGCACAAAAGCTAATAAAACAGAAACGTTTGGTAGATATAGGTATTTTCTGTAAGCCTTTGAAACCTTTTGGCAATGGCACCAGAGTTTGATATTTCAAGTGCGTCAAACAAAGAATGCATGTTACAGAGAATTGACGGGTGGTTGACAGCAACGGTGGAGGTCACAAAGCATCGAGGGTTGATTGTCAAGCAGTAAACCCTTGCTTTTAACCCTAACTTTGGATATCACATGCATACGAAGAGACTACGGAGGGTTTGATTCCGATGCACAACACAAAGTTTGAGGGAGGGAGGGGTGCCAT…	715	T	C
isotig00931	GATACCCTTGTGGGCTCTCCCAGTGATTCTGCTACGTTTGGAAGGCTCAACTGTACGAAAGAAAAGCACAAAAGCACGCTTCGTTTCTGAAAGAAAAGCACAAAAGCTAATAAAACAGAAACGTTTGGTAGATATAGGTATTTTCTGTAAGCCTTTGAAACCTTTTGGCAATGGCACCAGAGTTTGATATTTCAAGTGCGTCAAACAAAGAATGCATGTTACAGAGAATTGACGGGTGGTTGACAGCAACGGTGGAGGTCACAAAGCATCGAGGGTTGATTGTCAAGCAGTAAACCCTTGCTTTTAACCCTAACTTTGGATATCACATGCATACGAAGAGACTACGGAGGGTTTGATTCCGATGCACAACACAAAGTTTGAGGGAGGGAGGGGTGCCAT…	745	A	G
isotig00931	GATACCCTTGTGGGCTCTCCCAGTGATTCTGCTACGTTTGGAAGGCTCAACTGTACGAAAGAAAAGCACAAAAGCACGCTTCGTTTCTGAAAGAAAAGCACAAAAGCTAATAAAACAGAAACGTTTGGTAGATATAGGTATTTTCTGTAAGCCTTTGAAACCTTTTGGCAATGGCACCAGAGTTTGATATTTCAAGTGCGTCAAACAAAGAATGCATGTTACAGAGAATTGACGGGTGGTTGACAGCAACGGTGGAGGTCACAAAGCATCGAGGGTTGATTGTCAAGCAGTAAACCCTTGCTTTTAACCCTAACTTTGGATATCACATGCATACGAAGAGACTACGGAGGGTTTGATTCCGATGCACAACACAAAGTTTGAGGGAGGGAGGGGTGCCAT…	757	C	A
isotig00931	GATACCCTTGTGGGCTCTCCCAGTGATTCTGCTACGTTTGGAAGGCTCAACTGTACGAAAGAAAAGCACAAAAGCACGCTTCGTTTCTGAAAGAAAAGCACAAAAGCTAATAAAACAGAAACGTTTGGTAGATATAGGTATTTTCTGTAAGCCTTTGAAACCTTTTGGCAATGGCACCAGAGTTTGATATTTCAAGTGCGTCAAACAAAGAATGCATGTTACAGAGAATTGACGGGTGGTTGACAGCAACGGTGGAGGTCACAAAGCATCGAGGGTTGATTGTCAAGCAGTAAACCCTTGCTTTTAACCCTAACTTTGGATATCACATGCATACGAAGAGACTACGGAGGGTTTGATTCCGATGCACAACACAAAGTTTGAGGGAGGGAGGGGTGCCAT…	1456	T	G
isotig00931	GATACCCTTGTGGGCTCTCCCAGTGATTCTGCTACGTTTGGAAGGCTCAACTGTACGAAAGAAAAGCACAAAAGCACGCTTCGTTTCTGAAAGAAAAGCACAAAAGCTAATAAAACAGAAACGTTTGGTAGATATAGGTATTTTCTGTAAGCCTTTGAAACCTTTTGGCAATGGCACCAGAGTTTGATATTTCAAGTGCGTCAAACAAAGAATGCATGTTACAGAGAATTGACGGGTGGTTGACAGCAACGGTGGAGGTCACAAAGCATCGAGGGTTGATTGTCAAGCAGTAAACCCTTGCTTTTAACCCTAACTTTGGATATCACATGCATACGAAGAGACTACGGAGGGTTTGATTCCGATGCACAACACAAAGTTTGAGGGAGGGAGGGGTGCCAT…	1481	G	T
isotig01061	CGAGGAATTCAATTGTCTTTCGACAGTCCCGGAGTCTTCGCTGGTGGGCTGCAAGTGGACTGGAACGCCATTCAAGACTAGACCAAGGCGCTTCAGTCCAACCTCATGCCAACTAACCCCATCCCATTATTGTATCTGTGCTCTTCTTTTAATTATCCAATTTTTATAATAAGCTGCTGACGTCATTTCGATTCATTGATACTGTAACATCCAGATAGAGCTGCTCCTCTATTTTTGGCTATTTAAAGATAGATCAGGAACGGAGAAGCTTCAAAAACAGCATTCCCCATTTTCTACAGGAGCGTTGGGCATCATCCGAGTAATTAGCAAGCCCGTTGGATCAGGGTAAGCTCAGTACTAGCAAGCCCGGAGGATCAGGGCCTGCTCATATCTGTTTCT…	367	C	G
isotig01214	CGCAGCATAGATTCATCATTCTCCACTCAGCTCCTCTTCTGCTCGGAGACTCCACGCTCCAGTCTCCACTGCAGTTCAGGAATTCATTCGTTGAATTTAAGGCTGAATTGTGTGGCTGACGAGTAGTGAGCAGCGAGAGTCCTAAAATCATTATGGCTGGAGGAATGATGGCGGATTTGGAGGCTTTCAGGAAGGCTCAGAGGGCAGATGGCCCAGCCAACATCCTCGCTATAGGTACTGCTACTCCTCCCAATGCGGTCGATCAGAGTACTTATCCGGATTACTACTTCAAAATCACCAACAGCGAGCATATGACAGAGCTCAAGGAGAAATTTAGAAGAATGTGTAAGTTTTATATCTAATTCTTTCTCGAAAGTGTTTATTTTGTTGGTTTGATCT…	1869	A	G
isotig01214	CGCAGCATAGATTCATCATTCTCCACTCAGCTCCTCTTCTGCTCGGAGACTCCACGCTCCAGTCTCCACTGCAGTTCAGGAATTCATTCGTTGAATTTAAGGCTGAATTGTGTGGCTGACGAGTAGTGAGCAGCGAGAGTCCTAAAATCATTATGGCTGGAGGAATGATGGCGGATTTGGAGGCTTTCAGGAAGGCTCAGAGGGCAGATGGCCCAGCCAACATCCTCGCTATAGGTACTGCTACTCCTCCCAATGCGGTCGATCAGAGTACTTATCCGGATTACTACTTCAAAATCACCAACAGCGAGCATATGACAGAGCTCAAGGAGAAATTTAGAAGAATGTGTAAGTTTTATATCTAATTCTTTCTCGAAAGTGTTTATTTTGTTGGTTTGATCT…	1878	T	C
isotig01214	CGCAGCATAGATTCATCATTCTCCACTCAGCTCCTCTTCTGCTCGGAGACTCCACGCTCCAGTCTCCACTGCAGTTCAGGAATTCATTCGTTGAATTTAAGGCTGAATTGTGTGGCTGACGAGTAGTGAGCAGCGAGAGTCCTAAAATCATTATGGCTGGAGGAATGATGGCGGATTTGGAGGCTTTCAGGAAGGCTCAGAGGGCAGATGGCCCAGCCAACATCCTCGCTATAGGTACTGCTACTCCTCCCAATGCGGTCGATCAGAGTACTTATCCGGATTACTACTTCAAAATCACCAACAGCGAGCATATGACAGAGCTCAAGGAGAAATTTAGAAGAATGTGTAAGTTTTATATCTAATTCTTTCTCGAAAGTGTTTATTTTGTTGGTTTGATCT…	1927	A	T
isotig01214	CGCAGCATAGATTCATCATTCTCCACTCAGCTCCTCTTCTGCTCGGAGACTCCACGCTCCAGTCTCCACTGCAGTTCAGGAATTCATTCGTTGAATTTAAGGCTGAATTGTGTGGCTGACGAGTAGTGAGCAGCGAGAGTCCTAAAATCATTATGGCTGGAGGAATGATGGCGGATTTGGAGGCTTTCAGGAAGGCTCAGAGGGCAGATGGCCCAGCCAACATCCTCGCTATAGGTACTGCTACTCCTCCCAATGCGGTCGATCAGAGTACTTATCCGGATTACTACTTCAAAATCACCAACAGCGAGCATATGACAGAGCTCAAGGAGAAATTTAGAAGAATGTGTAAGTTTTATATCTAATTCTTTCTCGAAAGTGTTTATTTTGTTGGTTTGATCT…	2070	T	A
isotig01214	CGCAGCATAGATTCATCATTCTCCACTCAGCTCCTCTTCTGCTCGGAGACTCCACGCTCCAGTCTCCACTGCAGTTCAGGAATTCATTCGTTGAATTTAAGGCTGAATTGTGTGGCTGACGAGTAGTGAGCAGCGAGAGTCCTAAAATCATTATGGCTGGAGGAATGATGGCGGATTTGGAGGCTTTCAGGAAGGCTCAGAGGGCAGATGGCCCAGCCAACATCCTCGCTATAGGTACTGCTACTCCTCCCAATGCGGTCGATCAGAGTACTTATCCGGATTACTACTTCAAAATCACCAACAGCGAGCATATGACAGAGCTCAAGGAGAAATTTAGAAGAATGTGTAAGTTTTATATCTAATTCTTTCTCGAAAGTGTTTATTTTGTTGGTTTGATCT…	2134	G	A
isotig01214	CGCAGCATAGATTCATCATTCTCCACTCAGCTCCTCTTCTGCTCGGAGACTCCACGCTCCAGTCTCCACTGCAGTTCAGGAATTCATTCGTTGAATTTAAGGCTGAATTGTGTGGCTGACGAGTAGTGAGCAGCGAGAGTCCTAAAATCATTATGGCTGGAGGAATGATGGCGGATTTGGAGGCTTTCAGGAAGGCTCAGAGGGCAGATGGCCCAGCCAACATCCTCGCTATAGGTACTGCTACTCCTCCCAATGCGGTCGATCAGAGTACTTATCCGGATTACTACTTCAAAATCACCAACAGCGAGCATATGACAGAGCTCAAGGAGAAATTTAGAAGAATGTGTAAGTTTTATATCTAATTCTTTCTCGAAAGTGTTTATTTTGTTGGTTTGATCT…	2287	T	G
isotig01214	CGCAGCATAGATTCATCATTCTCCACTCAGCTCCTCTTCTGCTCGGAGACTCCACGCTCCAGTCTCCACTGCAGTTCAGGAATTCATTCGTTGAATTTAAGGCTGAATTGTGTGGCTGACGAGTAGTGAGCAGCGAGAGTCCTAAAATCATTATGGCTGGAGGAATGATGGCGGATTTGGAGGCTTTCAGGAAGGCTCAGAGGGCAGATGGCCCAGCCAACATCCTCGCTATAGGTACTGCTACTCCTCCCAATGCGGTCGATCAGAGTACTTATCCGGATTACTACTTCAAAATCACCAACAGCGAGCATATGACAGAGCTCAAGGAGAAATTTAGAAGAATGTGTAAGTTTTATATCTAATTCTTTCTCGAAAGTGTTTATTTTGTTGGTTTGATCT…	2332	T	C
isotig01214	CGCAGCATAGATTCATCATTCTCCACTCAGCTCCTCTTCTGCTCGGAGACTCCACGCTCCAGTCTCCACTGCAGTTCAGGAATTCATTCGTTGAATTTAAGGCTGAATTGTGTGGCTGACGAGTAGTGAGCAGCGAGAGTCCTAAAATCATTATGGCTGGAGGAATGATGGCGGATTTGGAGGCTTTCAGGAAGGCTCAGAGGGCAGATGGCCCAGCCAACATCCTCGCTATAGGTACTGCTACTCCTCCCAATGCGGTCGATCAGAGTACTTATCCGGATTACTACTTCAAAATCACCAACAGCGAGCATATGACAGAGCTCAAGGAGAAATTTAGAAGAATGTGTAAGTTTTATATCTAATTCTTTCTCGAAAGTGTTTATTTTGTTGGTTTGATCT…	2687	A	C
isotig01214	CGCAGCATAGATTCATCATTCTCCACTCAGCTCCTCTTCTGCTCGGAGACTCCACGCTCCAGTCTCCACTGCAGTTCAGGAATTCATTCGTTGAATTTAAGGCTGAATTGTGTGGCTGACGAGTAGTGAGCAGCGAGAGTCCTAAAATCATTATGGCTGGAGGAATGATGGCGGATTTGGAGGCTTTCAGGAAGGCTCAGAGGGCAGATGGCCCAGCCAACATCCTCGCTATAGGTACTGCTACTCCTCCCAATGCGGTCGATCAGAGTACTTATCCGGATTACTACTTCAAAATCACCAACAGCGAGCATATGACAGAGCTCAAGGAGAAATTTAGAAGAATGTGTAAGTTTTATATCTAATTCTTTCTCGAAAGTGTTTATTTTGTTGGTTTGATCT…	2870	T	A
isotig01214	CGCAGCATAGATTCATCATTCTCCACTCAGCTCCTCTTCTGCTCGGAGACTCCACGCTCCAGTCTCCACTGCAGTTCAGGAATTCATTCGTTGAATTTAAGGCTGAATTGTGTGGCTGACGAGTAGTGAGCAGCGAGAGTCCTAAAATCATTATGGCTGGAGGAATGATGGCGGATTTGGAGGCTTTCAGGAAGGCTCAGAGGGCAGATGGCCCAGCCAACATCCTCGCTATAGGTACTGCTACTCCTCCCAATGCGGTCGATCAGAGTACTTATCCGGATTACTACTTCAAAATCACCAACAGCGAGCATATGACAGAGCTCAAGGAGAAATTTAGAAGAATGTGTAAGTTTTATATCTAATTCTTTCTCGAAAGTGTTTATTTTGTTGGTTTGATCT…	2883	C	G
isotig01214	CGCAGCATAGATTCATCATTCTCCACTCAGCTCCTCTTCTGCTCGGAGACTCCACGCTCCAGTCTCCACTGCAGTTCAGGAATTCATTCGTTGAATTTAAGGCTGAATTGTGTGGCTGACGAGTAGTGAGCAGCGAGAGTCCTAAAATCATTATGGCTGGAGGAATGATGGCGGATTTGGAGGCTTTCAGGAAGGCTCAGAGGGCAGATGGCCCAGCCAACATCCTCGCTATAGGTACTGCTACTCCTCCCAATGCGGTCGATCAGAGTACTTATCCGGATTACTACTTCAAAATCACCAACAGCGAGCATATGACAGAGCTCAAGGAGAAATTTAGAAGAATGTGTAAGTTTTATATCTAATTCTTTCTCGAAAGTGTTTATTTTGTTGGTTTGATCT…	3203	C	T
isotig01214	CGCAGCATAGATTCATCATTCTCCACTCAGCTCCTCTTCTGCTCGGAGACTCCACGCTCCAGTCTCCACTGCAGTTCAGGAATTCATTCGTTGAATTTAAGGCTGAATTGTGTGGCTGACGAGTAGTGAGCAGCGAGAGTCCTAAAATCATTATGGCTGGAGGAATGATGGCGGATTTGGAGGCTTTCAGGAAGGCTCAGAGGGCAGATGGCCCAGCCAACATCCTCGCTATAGGTACTGCTACTCCTCCCAATGCGGTCGATCAGAGTACTTATCCGGATTACTACTTCAAAATCACCAACAGCGAGCATATGACAGAGCTCAAGGAGAAATTTAGAAGAATGTGTAAGTTTTATATCTAATTCTTTCTCGAAAGTGTTTATTTTGTTGGTTTGATCT…	3240	G	A
isotig01214	CGCAGCATAGATTCATCATTCTCCACTCAGCTCCTCTTCTGCTCGGAGACTCCACGCTCCAGTCTCCACTGCAGTTCAGGAATTCATTCGTTGAATTTAAGGCTGAATTGTGTGGCTGACGAGTAGTGAGCAGCGAGAGTCCTAAAATCATTATGGCTGGAGGAATGATGGCGGATTTGGAGGCTTTCAGGAAGGCTCAGAGGGCAGATGGCCCAGCCAACATCCTCGCTATAGGTACTGCTACTCCTCCCAATGCGGTCGATCAGAGTACTTATCCGGATTACTACTTCAAAATCACCAACAGCGAGCATATGACAGAGCTCAAGGAGAAATTTAGAAGAATGTGTAAGTTTTATATCTAATTCTTTCTCGAAAGTGTTTATTTTGTTGGTTTGATCT…	3242	T	C
isotig01214	CGCAGCATAGATTCATCATTCTCCACTCAGCTCCTCTTCTGCTCGGAGACTCCACGCTCCAGTCTCCACTGCAGTTCAGGAATTCATTCGTTGAATTTAAGGCTGAATTGTGTGGCTGACGAGTAGTGAGCAGCGAGAGTCCTAAAATCATTATGGCTGGAGGAATGATGGCGGATTTGGAGGCTTTCAGGAAGGCTCAGAGGGCAGATGGCCCAGCCAACATCCTCGCTATAGGTACTGCTACTCCTCCCAATGCGGTCGATCAGAGTACTTATCCGGATTACTACTTCAAAATCACCAACAGCGAGCATATGACAGAGCTCAAGGAGAAATTTAGAAGAATGTGTAAGTTTTATATCTAATTCTTTCTCGAAAGTGTTTATTTTGTTGGTTTGATCT…	3377	C	G
isotig01214	CGCAGCATAGATTCATCATTCTCCACTCAGCTCCTCTTCTGCTCGGAGACTCCACGCTCCAGTCTCCACTGCAGTTCAGGAATTCATTCGTTGAATTTAAGGCTGAATTGTGTGGCTGACGAGTAGTGAGCAGCGAGAGTCCTAAAATCATTATGGCTGGAGGAATGATGGCGGATTTGGAGGCTTTCAGGAAGGCTCAGAGGGCAGATGGCCCAGCCAACATCCTCGCTATAGGTACTGCTACTCCTCCCAATGCGGTCGATCAGAGTACTTATCCGGATTACTACTTCAAAATCACCAACAGCGAGCATATGACAGAGCTCAAGGAGAAATTTAGAAGAATGTGTAAGTTTTATATCTAATTCTTTCTCGAAAGTGTTTATTTTGTTGGTTTGATCT…	3392	G	A
isotig01214	CGCAGCATAGATTCATCATTCTCCACTCAGCTCCTCTTCTGCTCGGAGACTCCACGCTCCAGTCTCCACTGCAGTTCAGGAATTCATTCGTTGAATTTAAGGCTGAATTGTGTGGCTGACGAGTAGTGAGCAGCGAGAGTCCTAAAATCATTATGGCTGGAGGAATGATGGCGGATTTGGAGGCTTTCAGGAAGGCTCAGAGGGCAGATGGCCCAGCCAACATCCTCGCTATAGGTACTGCTACTCCTCCCAATGCGGTCGATCAGAGTACTTATCCGGATTACTACTTCAAAATCACCAACAGCGAGCATATGACAGAGCTCAAGGAGAAATTTAGAAGAATGTGTAAGTTTTATATCTAATTCTTTCTCGAAAGTGTTTATTTTGTTGGTTTGATCT…	3422	A	C
isotig01214	CGCAGCATAGATTCATCATTCTCCACTCAGCTCCTCTTCTGCTCGGAGACTCCACGCTCCAGTCTCCACTGCAGTTCAGGAATTCATTCGTTGAATTTAAGGCTGAATTGTGTGGCTGACGAGTAGTGAGCAGCGAGAGTCCTAAAATCATTATGGCTGGAGGAATGATGGCGGATTTGGAGGCTTTCAGGAAGGCTCAGAGGGCAGATGGCCCAGCCAACATCCTCGCTATAGGTACTGCTACTCCTCCCAATGCGGTCGATCAGAGTACTTATCCGGATTACTACTTCAAAATCACCAACAGCGAGCATATGACAGAGCTCAAGGAGAAATTTAGAAGAATGTGTAAGTTTTATATCTAATTCTTTCTCGAAAGTGTTTATTTTGTTGGTTTGATCT…	3440	C	G
isotig01214	CGCAGCATAGATTCATCATTCTCCACTCAGCTCCTCTTCTGCTCGGAGACTCCACGCTCCAGTCTCCACTGCAGTTCAGGAATTCATTCGTTGAATTTAAGGCTGAATTGTGTGGCTGACGAGTAGTGAGCAGCGAGAGTCCTAAAATCATTATGGCTGGAGGAATGATGGCGGATTTGGAGGCTTTCAGGAAGGCTCAGAGGGCAGATGGCCCAGCCAACATCCTCGCTATAGGTACTGCTACTCCTCCCAATGCGGTCGATCAGAGTACTTATCCGGATTACTACTTCAAAATCACCAACAGCGAGCATATGACAGAGCTCAAGGAGAAATTTAGAAGAATGTGTAAGTTTTATATCTAATTCTTTCTCGAAAGTGTTTATTTTGTTGGTTTGATCT…	3506	C	T
isotig01214	CGCAGCATAGATTCATCATTCTCCACTCAGCTCCTCTTCTGCTCGGAGACTCCACGCTCCAGTCTCCACTGCAGTTCAGGAATTCATTCGTTGAATTTAAGGCTGAATTGTGTGGCTGACGAGTAGTGAGCAGCGAGAGTCCTAAAATCATTATGGCTGGAGGAATGATGGCGGATTTGGAGGCTTTCAGGAAGGCTCAGAGGGCAGATGGCCCAGCCAACATCCTCGCTATAGGTACTGCTACTCCTCCCAATGCGGTCGATCAGAGTACTTATCCGGATTACTACTTCAAAATCACCAACAGCGAGCATATGACAGAGCTCAAGGAGAAATTTAGAAGAATGTGTAAGTTTTATATCTAATTCTTTCTCGAAAGTGTTTATTTTGTTGGTTTGATCT…	3726	A	G
isotig01214	CGCAGCATAGATTCATCATTCTCCACTCAGCTCCTCTTCTGCTCGGAGACTCCACGCTCCAGTCTCCACTGCAGTTCAGGAATTCATTCGTTGAATTTAAGGCTGAATTGTGTGGCTGACGAGTAGTGAGCAGCGAGAGTCCTAAAATCATTATGGCTGGAGGAATGATGGCGGATTTGGAGGCTTTCAGGAAGGCTCAGAGGGCAGATGGCCCAGCCAACATCCTCGCTATAGGTACTGCTACTCCTCCCAATGCGGTCGATCAGAGTACTTATCCGGATTACTACTTCAAAATCACCAACAGCGAGCATATGACAGAGCTCAAGGAGAAATTTAGAAGAATGTGTAAGTTTTATATCTAATTCTTTCTCGAAAGTGTTTATTTTGTTGGTTTGATCT…	3794	G	A
isotig01214	CGCAGCATAGATTCATCATTCTCCACTCAGCTCCTCTTCTGCTCGGAGACTCCACGCTCCAGTCTCCACTGCAGTTCAGGAATTCATTCGTTGAATTTAAGGCTGAATTGTGTGGCTGACGAGTAGTGAGCAGCGAGAGTCCTAAAATCATTATGGCTGGAGGAATGATGGCGGATTTGGAGGCTTTCAGGAAGGCTCAGAGGGCAGATGGCCCAGCCAACATCCTCGCTATAGGTACTGCTACTCCTCCCAATGCGGTCGATCAGAGTACTTATCCGGATTACTACTTCAAAATCACCAACAGCGAGCATATGACAGAGCTCAAGGAGAAATTTAGAAGAATGTGTAAGTTTTATATCTAATTCTTTCTCGAAAGTGTTTATTTTGTTGGTTTGATCT…	3807	G	T
isotig01214	CGCAGCATAGATTCATCATTCTCCACTCAGCTCCTCTTCTGCTCGGAGACTCCACGCTCCAGTCTCCACTGCAGTTCAGGAATTCATTCGTTGAATTTAAGGCTGAATTGTGTGGCTGACGAGTAGTGAGCAGCGAGAGTCCTAAAATCATTATGGCTGGAGGAATGATGGCGGATTTGGAGGCTTTCAGGAAGGCTCAGAGGGCAGATGGCCCAGCCAACATCCTCGCTATAGGTACTGCTACTCCTCCCAATGCGGTCGATCAGAGTACTTATCCGGATTACTACTTCAAAATCACCAACAGCGAGCATATGACAGAGCTCAAGGAGAAATTTAGAAGAATGTGTAAGTTTTATATCTAATTCTTTCTCGAAAGTGTTTATTTTGTTGGTTTGATCT…	3815	G	A
isotig01214	CGCAGCATAGATTCATCATTCTCCACTCAGCTCCTCTTCTGCTCGGAGACTCCACGCTCCAGTCTCCACTGCAGTTCAGGAATTCATTCGTTGAATTTAAGGCTGAATTGTGTGGCTGACGAGTAGTGAGCAGCGAGAGTCCTAAAATCATTATGGCTGGAGGAATGATGGCGGATTTGGAGGCTTTCAGGAAGGCTCAGAGGGCAGATGGCCCAGCCAACATCCTCGCTATAGGTACTGCTACTCCTCCCAATGCGGTCGATCAGAGTACTTATCCGGATTACTACTTCAAAATCACCAACAGCGAGCATATGACAGAGCTCAAGGAGAAATTTAGAAGAATGTGTAAGTTTTATATCTAATTCTTTCTCGAAAGTGTTTATTTTGTTGGTTTGATCT…	3843	G	A
isotig01262	GGCTCTGTTTTAAATCCTGGGGACTGCTCGACTAGCAAGGCGTGCACCATGATGAAGAAATAGAGGAGCGCCGCTTCCATTAATGTAGCAGATCTAAGATTTGTGTTGAGGGGGAGCTCTTCATTTGTTTGTCTATTTTATTTGATGAAATATGCCTATACGTTAAGCTCTAGAATGGCGGGCAGTGGGCCAGAAAGGCCTCCGAGGCATTTACAGATGAAGCTTTTGTTTGGAATGAAAAGCACACACGGGCTCATGGTGGGTGGAAACCATCACTGCCGCCAGATTTTGCACGCGATAGATCCCGTCTCCGTTCCCCCGCTGGTAAATCTCCTTTCTTTCCTTTGCTCGATCTTTATTGTTGGACAAATGACCGCAACGTTTCCCAACCAGAAACGA…	161	C	T
isotig01262	GGCTCTGTTTTAAATCCTGGGGACTGCTCGACTAGCAAGGCGTGCACCATGATGAAGAAATAGAGGAGCGCCGCTTCCATTAATGTAGCAGATCTAAGATTTGTGTTGAGGGGGAGCTCTTCATTTGTTTGTCTATTTTATTTGATGAAATATGCCTATACGTTAAGCTCTAGAATGGCGGGCAGTGGGCCAGAAAGGCCTCCGAGGCATTTACAGATGAAGCTTTTGTTTGGAATGAAAAGCACACACGGGCTCATGGTGGGTGGAAACCATCACTGCCGCCAGATTTTGCACGCGATAGATCCCGTCTCCGTTCCCCCGCTGGTAAATCTCCTTTCTTTCCTTTGCTCGATCTTTATTGTTGGACAAATGACCGCAACGTTTCCCAACCAGAAACGA…	1662	T	C
isotig01262	GGCTCTGTTTTAAATCCTGGGGACTGCTCGACTAGCAAGGCGTGCACCATGATGAAGAAATAGAGGAGCGCCGCTTCCATTAATGTAGCAGATCTAAGATTTGTGTTGAGGGGGAGCTCTTCATTTGTTTGTCTATTTTATTTGATGAAATATGCCTATACGTTAAGCTCTAGAATGGCGGGCAGTGGGCCAGAAAGGCCTCCGAGGCATTTACAGATGAAGCTTTTGTTTGGAATGAAAAGCACACACGGGCTCATGGTGGGTGGAAACCATCACTGCCGCCAGATTTTGCACGCGATAGATCCCGTCTCCGTTCCCCCGCTGGTAAATCTCCTTTCTTTCCTTTGCTCGATCTTTATTGTTGGACAAATGACCGCAACGTTTCCCAACCAGAAACGA…	1674	C	G
isotig01262	GGCTCTGTTTTAAATCCTGGGGACTGCTCGACTAGCAAGGCGTGCACCATGATGAAGAAATAGAGGAGCGCCGCTTCCATTAATGTAGCAGATCTAAGATTTGTGTTGAGGGGGAGCTCTTCATTTGTTTGTCTATTTTATTTGATGAAATATGCCTATACGTTAAGCTCTAGAATGGCGGGCAGTGGGCCAGAAAGGCCTCCGAGGCATTTACAGATGAAGCTTTTGTTTGGAATGAAAAGCACACACGGGCTCATGGTGGGTGGAAACCATCACTGCCGCCAGATTTTGCACGCGATAGATCCCGTCTCCGTTCCCCCGCTGGTAAATCTCCTTTCTTTCCTTTGCTCGATCTTTATTGTTGGACAAATGACCGCAACGTTTCCCAACCAGAAACGA…	1680	G	A
isotig01262	GGCTCTGTTTTAAATCCTGGGGACTGCTCGACTAGCAAGGCGTGCACCATGATGAAGAAATAGAGGAGCGCCGCTTCCATTAATGTAGCAGATCTAAGATTTGTGTTGAGGGGGAGCTCTTCATTTGTTTGTCTATTTTATTTGATGAAATATGCCTATACGTTAAGCTCTAGAATGGCGGGCAGTGGGCCAGAAAGGCCTCCGAGGCATTTACAGATGAAGCTTTTGTTTGGAATGAAAAGCACACACGGGCTCATGGTGGGTGGAAACCATCACTGCCGCCAGATTTTGCACGCGATAGATCCCGTCTCCGTTCCCCCGCTGGTAAATCTCCTTTCTTTCCTTTGCTCGATCTTTATTGTTGGACAAATGACCGCAACGTTTCCCAACCAGAAACGA…	1730	A	C
isotig01262	GGCTCTGTTTTAAATCCTGGGGACTGCTCGACTAGCAAGGCGTGCACCATGATGAAGAAATAGAGGAGCGCCGCTTCCATTAATGTAGCAGATCTAAGATTTGTGTTGAGGGGGAGCTCTTCATTTGTTTGTCTATTTTATTTGATGAAATATGCCTATACGTTAAGCTCTAGAATGGCGGGCAGTGGGCCAGAAAGGCCTCCGAGGCATTTACAGATGAAGCTTTTGTTTGGAATGAAAAGCACACACGGGCTCATGGTGGGTGGAAACCATCACTGCCGCCAGATTTTGCACGCGATAGATCCCGTCTCCGTTCCCCCGCTGGTAAATCTCCTTTCTTTCCTTTGCTCGATCTTTATTGTTGGACAAATGACCGCAACGTTTCCCAACCAGAAACGA…	1752	G	A
isotig01262	GGCTCTGTTTTAAATCCTGGGGACTGCTCGACTAGCAAGGCGTGCACCATGATGAAGAAATAGAGGAGCGCCGCTTCCATTAATGTAGCAGATCTAAGATTTGTGTTGAGGGGGAGCTCTTCATTTGTTTGTCTATTTTATTTGATGAAATATGCCTATACGTTAAGCTCTAGAATGGCGGGCAGTGGGCCAGAAAGGCCTCCGAGGCATTTACAGATGAAGCTTTTGTTTGGAATGAAAAGCACACACGGGCTCATGGTGGGTGGAAACCATCACTGCCGCCAGATTTTGCACGCGATAGATCCCGTCTCCGTTCCCCCGCTGGTAAATCTCCTTTCTTTCCTTTGCTCGATCTTTATTGTTGGACAAATGACCGCAACGTTTCCCAACCAGAAACGA…	1776	C	T
isotig01262	GGCTCTGTTTTAAATCCTGGGGACTGCTCGACTAGCAAGGCGTGCACCATGATGAAGAAATAGAGGAGCGCCGCTTCCATTAATGTAGCAGATCTAAGATTTGTGTTGAGGGGGAGCTCTTCATTTGTTTGTCTATTTTATTTGATGAAATATGCCTATACGTTAAGCTCTAGAATGGCGGGCAGTGGGCCAGAAAGGCCTCCGAGGCATTTACAGATGAAGCTTTTGTTTGGAATGAAAAGCACACACGGGCTCATGGTGGGTGGAAACCATCACTGCCGCCAGATTTTGCACGCGATAGATCCCGTCTCCGTTCCCCCGCTGGTAAATCTCCTTTCTTTCCTTTGCTCGATCTTTATTGTTGGACAAATGACCGCAACGTTTCCCAACCAGAAACGA…	2779	G	A
isotig01262	GGCTCTGTTTTAAATCCTGGGGACTGCTCGACTAGCAAGGCGTGCACCATGATGAAGAAATAGAGGAGCGCCGCTTCCATTAATGTAGCAGATCTAAGATTTGTGTTGAGGGGGAGCTCTTCATTTGTTTGTCTATTTTATTTGATGAAATATGCCTATACGTTAAGCTCTAGAATGGCGGGCAGTGGGCCAGAAAGGCCTCCGAGGCATTTACAGATGAAGCTTTTGTTTGGAATGAAAAGCACACACGGGCTCATGGTGGGTGGAAACCATCACTGCCGCCAGATTTTGCACGCGATAGATCCCGTCTCCGTTCCCCCGCTGGTAAATCTCCTTTCTTTCCTTTGCTCGATCTTTATTGTTGGACAAATGACCGCAACGTTTCCCAACCAGAAACGA…	2855	G	A
isotig01262	GGCTCTGTTTTAAATCCTGGGGACTGCTCGACTAGCAAGGCGTGCACCATGATGAAGAAATAGAGGAGCGCCGCTTCCATTAATGTAGCAGATCTAAGATTTGTGTTGAGGGGGAGCTCTTCATTTGTTTGTCTATTTTATTTGATGAAATATGCCTATACGTTAAGCTCTAGAATGGCGGGCAGTGGGCCAGAAAGGCCTCCGAGGCATTTACAGATGAAGCTTTTGTTTGGAATGAAAAGCACACACGGGCTCATGGTGGGTGGAAACCATCACTGCCGCCAGATTTTGCACGCGATAGATCCCGTCTCCGTTCCCCCGCTGGTAAATCTCCTTTCTTTCCTTTGCTCGATCTTTATTGTTGGACAAATGACCGCAACGTTTCCCAACCAGAAACGA…	2992	T	C
isotig01262	GGCTCTGTTTTAAATCCTGGGGACTGCTCGACTAGCAAGGCGTGCACCATGATGAAGAAATAGAGGAGCGCCGCTTCCATTAATGTAGCAGATCTAAGATTTGTGTTGAGGGGGAGCTCTTCATTTGTTTGTCTATTTTATTTGATGAAATATGCCTATACGTTAAGCTCTAGAATGGCGGGCAGTGGGCCAGAAAGGCCTCCGAGGCATTTACAGATGAAGCTTTTGTTTGGAATGAAAAGCACACACGGGCTCATGGTGGGTGGAAACCATCACTGCCGCCAGATTTTGCACGCGATAGATCCCGTCTCCGTTCCCCCGCTGGTAAATCTCCTTTCTTTCCTTTGCTCGATCTTTATTGTTGGACAAATGACCGCAACGTTTCCCAACCAGAAACGA…	3124	A	G
isotig01415	GATAGACCATTGCAATTATTGGTCTTCAACGAGGAATTCCTAGTAAGCGCGTGTCATCAACTCGTGTTGACTACGTCCCTGCCCTTTGTACACACCGCCCGTCGCTCCTACCGATTGAATGATCCGGTGAAGTGTTCGGATTGCGTCGACGATGGTGGTTCGCCGCCGTCGACGTCGTGAGAAGTTCATTGAACCTTATCATTTAGAGGAAGGAGAAGTCGTAACAAGGTTACCGTAGGTGAACCTGCGGTAGGATCATTGGATTTTCAAGCATTTTCGACACGGATCACCGGAAATATCGATTTGGGTCTTCTGGATTTTCTCCTATCTGAATCGGGTCCTGACGATCTTCTTCAGATCCAGCCACTCAAGGCCTTAAGCATTCAGGAGTGCCCAGTG…	278	C	G
isotig01415	GATAGACCATTGCAATTATTGGTCTTCAACGAGGAATTCCTAGTAAGCGCGTGTCATCAACTCGTGTTGACTACGTCCCTGCCCTTTGTACACACCGCCCGTCGCTCCTACCGATTGAATGATCCGGTGAAGTGTTCGGATTGCGTCGACGATGGTGGTTCGCCGCCGTCGACGTCGTGAGAAGTTCATTGAACCTTATCATTTAGAGGAAGGAGAAGTCGTAACAAGGTTACCGTAGGTGAACCTGCGGTAGGATCATTGGATTTTCAAGCATTTTCGACACGGATCACCGGAAATATCGATTTGGGTCTTCTGGATTTTCTCCTATCTGAATCGGGTCCTGACGATCTTCTTCAGATCCAGCCACTCAAGGCCTTAAGCATTCAGGAGTGCCCAGTG…	286	A	G
isotig01415	GATAGACCATTGCAATTATTGGTCTTCAACGAGGAATTCCTAGTAAGCGCGTGTCATCAACTCGTGTTGACTACGTCCCTGCCCTTTGTACACACCGCCCGTCGCTCCTACCGATTGAATGATCCGGTGAAGTGTTCGGATTGCGTCGACGATGGTGGTTCGCCGCCGTCGACGTCGTGAGAAGTTCATTGAACCTTATCATTTAGAGGAAGGAGAAGTCGTAACAAGGTTACCGTAGGTGAACCTGCGGTAGGATCATTGGATTTTCAAGCATTTTCGACACGGATCACCGGAAATATCGATTTGGGTCTTCTGGATTTTCTCCTATCTGAATCGGGTCCTGACGATCTTCTTCAGATCCAGCCACTCAAGGCCTTAAGCATTCAGGAGTGCCCAGTG…	287	T	C
isotig01415	GATAGACCATTGCAATTATTGGTCTTCAACGAGGAATTCCTAGTAAGCGCGTGTCATCAACTCGTGTTGACTACGTCCCTGCCCTTTGTACACACCGCCCGTCGCTCCTACCGATTGAATGATCCGGTGAAGTGTTCGGATTGCGTCGACGATGGTGGTTCGCCGCCGTCGACGTCGTGAGAAGTTCATTGAACCTTATCATTTAGAGGAAGGAGAAGTCGTAACAAGGTTACCGTAGGTGAACCTGCGGTAGGATCATTGGATTTTCAAGCATTTTCGACACGGATCACCGGAAATATCGATTTGGGTCTTCTGGATTTTCTCCTATCTGAATCGGGTCCTGACGATCTTCTTCAGATCCAGCCACTCAAGGCCTTAAGCATTCAGGAGTGCCCAGTG…	293	G	A
isotig01415	GATAGACCATTGCAATTATTGGTCTTCAACGAGGAATTCCTAGTAAGCGCGTGTCATCAACTCGTGTTGACTACGTCCCTGCCCTTTGTACACACCGCCCGTCGCTCCTACCGATTGAATGATCCGGTGAAGTGTTCGGATTGCGTCGACGATGGTGGTTCGCCGCCGTCGACGTCGTGAGAAGTTCATTGAACCTTATCATTTAGAGGAAGGAGAAGTCGTAACAAGGTTACCGTAGGTGAACCTGCGGTAGGATCATTGGATTTTCAAGCATTTTCGACACGGATCACCGGAAATATCGATTTGGGTCTTCTGGATTTTCTCCTATCTGAATCGGGTCCTGACGATCTTCTTCAGATCCAGCCACTCAAGGCCTTAAGCATTCAGGAGTGCCCAGTG…	307	G	A
isotig01415	GATAGACCATTGCAATTATTGGTCTTCAACGAGGAATTCCTAGTAAGCGCGTGTCATCAACTCGTGTTGACTACGTCCCTGCCCTTTGTACACACCGCCCGTCGCTCCTACCGATTGAATGATCCGGTGAAGTGTTCGGATTGCGTCGACGATGGTGGTTCGCCGCCGTCGACGTCGTGAGAAGTTCATTGAACCTTATCATTTAGAGGAAGGAGAAGTCGTAACAAGGTTACCGTAGGTGAACCTGCGGTAGGATCATTGGATTTTCAAGCATTTTCGACACGGATCACCGGAAATATCGATTTGGGTCTTCTGGATTTTCTCCTATCTGAATCGGGTCCTGACGATCTTCTTCAGATCCAGCCACTCAAGGCCTTAAGCATTCAGGAGTGCCCAGTG…	310	C	T
isotig01415	GATAGACCATTGCAATTATTGGTCTTCAACGAGGAATTCCTAGTAAGCGCGTGTCATCAACTCGTGTTGACTACGTCCCTGCCCTTTGTACACACCGCCCGTCGCTCCTACCGATTGAATGATCCGGTGAAGTGTTCGGATTGCGTCGACGATGGTGGTTCGCCGCCGTCGACGTCGTGAGAAGTTCATTGAACCTTATCATTTAGAGGAAGGAGAAGTCGTAACAAGGTTACCGTAGGTGAACCTGCGGTAGGATCATTGGATTTTCAAGCATTTTCGACACGGATCACCGGAAATATCGATTTGGGTCTTCTGGATTTTCTCCTATCTGAATCGGGTCCTGACGATCTTCTTCAGATCCAGCCACTCAAGGCCTTAAGCATTCAGGAGTGCCCAGTG…	315	G	C
isotig01415	GATAGACCATTGCAATTATTGGTCTTCAACGAGGAATTCCTAGTAAGCGCGTGTCATCAACTCGTGTTGACTACGTCCCTGCCCTTTGTACACACCGCCCGTCGCTCCTACCGATTGAATGATCCGGTGAAGTGTTCGGATTGCGTCGACGATGGTGGTTCGCCGCCGTCGACGTCGTGAGAAGTTCATTGAACCTTATCATTTAGAGGAAGGAGAAGTCGTAACAAGGTTACCGTAGGTGAACCTGCGGTAGGATCATTGGATTTTCAAGCATTTTCGACACGGATCACCGGAAATATCGATTTGGGTCTTCTGGATTTTCTCCTATCTGAATCGGGTCCTGACGATCTTCTTCAGATCCAGCCACTCAAGGCCTTAAGCATTCAGGAGTGCCCAGTG…	335	C	T
isotig01415	GATAGACCATTGCAATTATTGGTCTTCAACGAGGAATTCCTAGTAAGCGCGTGTCATCAACTCGTGTTGACTACGTCCCTGCCCTTTGTACACACCGCCCGTCGCTCCTACCGATTGAATGATCCGGTGAAGTGTTCGGATTGCGTCGACGATGGTGGTTCGCCGCCGTCGACGTCGTGAGAAGTTCATTGAACCTTATCATTTAGAGGAAGGAGAAGTCGTAACAAGGTTACCGTAGGTGAACCTGCGGTAGGATCATTGGATTTTCAAGCATTTTCGACACGGATCACCGGAAATATCGATTTGGGTCTTCTGGATTTTCTCCTATCTGAATCGGGTCCTGACGATCTTCTTCAGATCCAGCCACTCAAGGCCTTAAGCATTCAGGAGTGCCCAGTG…	340	C	T
isotig01415	GATAGACCATTGCAATTATTGGTCTTCAACGAGGAATTCCTAGTAAGCGCGTGTCATCAACTCGTGTTGACTACGTCCCTGCCCTTTGTACACACCGCCCGTCGCTCCTACCGATTGAATGATCCGGTGAAGTGTTCGGATTGCGTCGACGATGGTGGTTCGCCGCCGTCGACGTCGTGAGAAGTTCATTGAACCTTATCATTTAGAGGAAGGAGAAGTCGTAACAAGGTTACCGTAGGTGAACCTGCGGTAGGATCATTGGATTTTCAAGCATTTTCGACACGGATCACCGGAAATATCGATTTGGGTCTTCTGGATTTTCTCCTATCTGAATCGGGTCCTGACGATCTTCTTCAGATCCAGCCACTCAAGGCCTTAAGCATTCAGGAGTGCCCAGTG…	360	C	T
isotig01415	GATAGACCATTGCAATTATTGGTCTTCAACGAGGAATTCCTAGTAAGCGCGTGTCATCAACTCGTGTTGACTACGTCCCTGCCCTTTGTACACACCGCCCGTCGCTCCTACCGATTGAATGATCCGGTGAAGTGTTCGGATTGCGTCGACGATGGTGGTTCGCCGCCGTCGACGTCGTGAGAAGTTCATTGAACCTTATCATTTAGAGGAAGGAGAAGTCGTAACAAGGTTACCGTAGGTGAACCTGCGGTAGGATCATTGGATTTTCAAGCATTTTCGACACGGATCACCGGAAATATCGATTTGGGTCTTCTGGATTTTCTCCTATCTGAATCGGGTCCTGACGATCTTCTTCAGATCCAGCCACTCAAGGCCTTAAGCATTCAGGAGTGCCCAGTG…	385	C	T
isotig01415	GATAGACCATTGCAATTATTGGTCTTCAACGAGGAATTCCTAGTAAGCGCGTGTCATCAACTCGTGTTGACTACGTCCCTGCCCTTTGTACACACCGCCCGTCGCTCCTACCGATTGAATGATCCGGTGAAGTGTTCGGATTGCGTCGACGATGGTGGTTCGCCGCCGTCGACGTCGTGAGAAGTTCATTGAACCTTATCATTTAGAGGAAGGAGAAGTCGTAACAAGGTTACCGTAGGTGAACCTGCGGTAGGATCATTGGATTTTCAAGCATTTTCGACACGGATCACCGGAAATATCGATTTGGGTCTTCTGGATTTTCTCCTATCTGAATCGGGTCCTGACGATCTTCTTCAGATCCAGCCACTCAAGGCCTTAAGCATTCAGGAGTGCCCAGTG…	400	T	C
isotig01415	GATAGACCATTGCAATTATTGGTCTTCAACGAGGAATTCCTAGTAAGCGCGTGTCATCAACTCGTGTTGACTACGTCCCTGCCCTTTGTACACACCGCCCGTCGCTCCTACCGATTGAATGATCCGGTGAAGTGTTCGGATTGCGTCGACGATGGTGGTTCGCCGCCGTCGACGTCGTGAGAAGTTCATTGAACCTTATCATTTAGAGGAAGGAGAAGTCGTAACAAGGTTACCGTAGGTGAACCTGCGGTAGGATCATTGGATTTTCAAGCATTTTCGACACGGATCACCGGAAATATCGATTTGGGTCTTCTGGATTTTCTCCTATCTGAATCGGGTCCTGACGATCTTCTTCAGATCCAGCCACTCAAGGCCTTAAGCATTCAGGAGTGCCCAGTG…	403	G	C
isotig01415	GATAGACCATTGCAATTATTGGTCTTCAACGAGGAATTCCTAGTAAGCGCGTGTCATCAACTCGTGTTGACTACGTCCCTGCCCTTTGTACACACCGCCCGTCGCTCCTACCGATTGAATGATCCGGTGAAGTGTTCGGATTGCGTCGACGATGGTGGTTCGCCGCCGTCGACGTCGTGAGAAGTTCATTGAACCTTATCATTTAGAGGAAGGAGAAGTCGTAACAAGGTTACCGTAGGTGAACCTGCGGTAGGATCATTGGATTTTCAAGCATTTTCGACACGGATCACCGGAAATATCGATTTGGGTCTTCTGGATTTTCTCCTATCTGAATCGGGTCCTGACGATCTTCTTCAGATCCAGCCACTCAAGGCCTTAAGCATTCAGGAGTGCCCAGTG…	415	T	G
isotig01415	GATAGACCATTGCAATTATTGGTCTTCAACGAGGAATTCCTAGTAAGCGCGTGTCATCAACTCGTGTTGACTACGTCCCTGCCCTTTGTACACACCGCCCGTCGCTCCTACCGATTGAATGATCCGGTGAAGTGTTCGGATTGCGTCGACGATGGTGGTTCGCCGCCGTCGACGTCGTGAGAAGTTCATTGAACCTTATCATTTAGAGGAAGGAGAAGTCGTAACAAGGTTACCGTAGGTGAACCTGCGGTAGGATCATTGGATTTTCAAGCATTTTCGACACGGATCACCGGAAATATCGATTTGGGTCTTCTGGATTTTCTCCTATCTGAATCGGGTCCTGACGATCTTCTTCAGATCCAGCCACTCAAGGCCTTAAGCATTCAGGAGTGCCCAGTG…	452	A	C
isotig01415	GATAGACCATTGCAATTATTGGTCTTCAACGAGGAATTCCTAGTAAGCGCGTGTCATCAACTCGTGTTGACTACGTCCCTGCCCTTTGTACACACCGCCCGTCGCTCCTACCGATTGAATGATCCGGTGAAGTGTTCGGATTGCGTCGACGATGGTGGTTCGCCGCCGTCGACGTCGTGAGAAGTTCATTGAACCTTATCATTTAGAGGAAGGAGAAGTCGTAACAAGGTTACCGTAGGTGAACCTGCGGTAGGATCATTGGATTTTCAAGCATTTTCGACACGGATCACCGGAAATATCGATTTGGGTCTTCTGGATTTTCTCCTATCTGAATCGGGTCCTGACGATCTTCTTCAGATCCAGCCACTCAAGGCCTTAAGCATTCAGGAGTGCCCAGTG…	480	C	A
isotig01415	GATAGACCATTGCAATTATTGGTCTTCAACGAGGAATTCCTAGTAAGCGCGTGTCATCAACTCGTGTTGACTACGTCCCTGCCCTTTGTACACACCGCCCGTCGCTCCTACCGATTGAATGATCCGGTGAAGTGTTCGGATTGCGTCGACGATGGTGGTTCGCCGCCGTCGACGTCGTGAGAAGTTCATTGAACCTTATCATTTAGAGGAAGGAGAAGTCGTAACAAGGTTACCGTAGGTGAACCTGCGGTAGGATCATTGGATTTTCAAGCATTTTCGACACGGATCACCGGAAATATCGATTTGGGTCTTCTGGATTTTCTCCTATCTGAATCGGGTCCTGACGATCTTCTTCAGATCCAGCCACTCAAGGCCTTAAGCATTCAGGAGTGCCCAGTG…	485	A	G
isotig01415	GATAGACCATTGCAATTATTGGTCTTCAACGAGGAATTCCTAGTAAGCGCGTGTCATCAACTCGTGTTGACTACGTCCCTGCCCTTTGTACACACCGCCCGTCGCTCCTACCGATTGAATGATCCGGTGAAGTGTTCGGATTGCGTCGACGATGGTGGTTCGCCGCCGTCGACGTCGTGAGAAGTTCATTGAACCTTATCATTTAGAGGAAGGAGAAGTCGTAACAAGGTTACCGTAGGTGAACCTGCGGTAGGATCATTGGATTTTCAAGCATTTTCGACACGGATCACCGGAAATATCGATTTGGGTCTTCTGGATTTTCTCCTATCTGAATCGGGTCCTGACGATCTTCTTCAGATCCAGCCACTCAAGGCCTTAAGCATTCAGGAGTGCCCAGTG…	504	C	G
isotig01415	GATAGACCATTGCAATTATTGGTCTTCAACGAGGAATTCCTAGTAAGCGCGTGTCATCAACTCGTGTTGACTACGTCCCTGCCCTTTGTACACACCGCCCGTCGCTCCTACCGATTGAATGATCCGGTGAAGTGTTCGGATTGCGTCGACGATGGTGGTTCGCCGCCGTCGACGTCGTGAGAAGTTCATTGAACCTTATCATTTAGAGGAAGGAGAAGTCGTAACAAGGTTACCGTAGGTGAACCTGCGGTAGGATCATTGGATTTTCAAGCATTTTCGACACGGATCACCGGAAATATCGATTTGGGTCTTCTGGATTTTCTCCTATCTGAATCGGGTCCTGACGATCTTCTTCAGATCCAGCCACTCAAGGCCTTAAGCATTCAGGAGTGCCCAGTG…	545	G	A
isotig01415	GATAGACCATTGCAATTATTGGTCTTCAACGAGGAATTCCTAGTAAGCGCGTGTCATCAACTCGTGTTGACTACGTCCCTGCCCTTTGTACACACCGCCCGTCGCTCCTACCGATTGAATGATCCGGTGAAGTGTTCGGATTGCGTCGACGATGGTGGTTCGCCGCCGTCGACGTCGTGAGAAGTTCATTGAACCTTATCATTTAGAGGAAGGAGAAGTCGTAACAAGGTTACCGTAGGTGAACCTGCGGTAGGATCATTGGATTTTCAAGCATTTTCGACACGGATCACCGGAAATATCGATTTGGGTCTTCTGGATTTTCTCCTATCTGAATCGGGTCCTGACGATCTTCTTCAGATCCAGCCACTCAAGGCCTTAAGCATTCAGGAGTGCCCAGTG…	560	A	T
isotig01415	GATAGACCATTGCAATTATTGGTCTTCAACGAGGAATTCCTAGTAAGCGCGTGTCATCAACTCGTGTTGACTACGTCCCTGCCCTTTGTACACACCGCCCGTCGCTCCTACCGATTGAATGATCCGGTGAAGTGTTCGGATTGCGTCGACGATGGTGGTTCGCCGCCGTCGACGTCGTGAGAAGTTCATTGAACCTTATCATTTAGAGGAAGGAGAAGTCGTAACAAGGTTACCGTAGGTGAACCTGCGGTAGGATCATTGGATTTTCAAGCATTTTCGACACGGATCACCGGAAATATCGATTTGGGTCTTCTGGATTTTCTCCTATCTGAATCGGGTCCTGACGATCTTCTTCAGATCCAGCCACTCAAGGCCTTAAGCATTCAGGAGTGCCCAGTG…	1174	T	C
isotig01415	GATAGACCATTGCAATTATTGGTCTTCAACGAGGAATTCCTAGTAAGCGCGTGTCATCAACTCGTGTTGACTACGTCCCTGCCCTTTGTACACACCGCCCGTCGCTCCTACCGATTGAATGATCCGGTGAAGTGTTCGGATTGCGTCGACGATGGTGGTTCGCCGCCGTCGACGTCGTGAGAAGTTCATTGAACCTTATCATTTAGAGGAAGGAGAAGTCGTAACAAGGTTACCGTAGGTGAACCTGCGGTAGGATCATTGGATTTTCAAGCATTTTCGACACGGATCACCGGAAATATCGATTTGGGTCTTCTGGATTTTCTCCTATCTGAATCGGGTCCTGACGATCTTCTTCAGATCCAGCCACTCAAGGCCTTAAGCATTCAGGAGTGCCCAGTG…	1195	T	C
isotig01415	GATAGACCATTGCAATTATTGGTCTTCAACGAGGAATTCCTAGTAAGCGCGTGTCATCAACTCGTGTTGACTACGTCCCTGCCCTTTGTACACACCGCCCGTCGCTCCTACCGATTGAATGATCCGGTGAAGTGTTCGGATTGCGTCGACGATGGTGGTTCGCCGCCGTCGACGTCGTGAGAAGTTCATTGAACCTTATCATTTAGAGGAAGGAGAAGTCGTAACAAGGTTACCGTAGGTGAACCTGCGGTAGGATCATTGGATTTTCAAGCATTTTCGACACGGATCACCGGAAATATCGATTTGGGTCTTCTGGATTTTCTCCTATCTGAATCGGGTCCTGACGATCTTCTTCAGATCCAGCCACTCAAGGCCTTAAGCATTCAGGAGTGCCCAGTG…	1226	A	C
isotig01415	GATAGACCATTGCAATTATTGGTCTTCAACGAGGAATTCCTAGTAAGCGCGTGTCATCAACTCGTGTTGACTACGTCCCTGCCCTTTGTACACACCGCCCGTCGCTCCTACCGATTGAATGATCCGGTGAAGTGTTCGGATTGCGTCGACGATGGTGGTTCGCCGCCGTCGACGTCGTGAGAAGTTCATTGAACCTTATCATTTAGAGGAAGGAGAAGTCGTAACAAGGTTACCGTAGGTGAACCTGCGGTAGGATCATTGGATTTTCAAGCATTTTCGACACGGATCACCGGAAATATCGATTTGGGTCTTCTGGATTTTCTCCTATCTGAATCGGGTCCTGACGATCTTCTTCAGATCCAGCCACTCAAGGCCTTAAGCATTCAGGAGTGCCCAGTG…	1528	T	A
isotig01415	GATAGACCATTGCAATTATTGGTCTTCAACGAGGAATTCCTAGTAAGCGCGTGTCATCAACTCGTGTTGACTACGTCCCTGCCCTTTGTACACACCGCCCGTCGCTCCTACCGATTGAATGATCCGGTGAAGTGTTCGGATTGCGTCGACGATGGTGGTTCGCCGCCGTCGACGTCGTGAGAAGTTCATTGAACCTTATCATTTAGAGGAAGGAGAAGTCGTAACAAGGTTACCGTAGGTGAACCTGCGGTAGGATCATTGGATTTTCAAGCATTTTCGACACGGATCACCGGAAATATCGATTTGGGTCTTCTGGATTTTCTCCTATCTGAATCGGGTCCTGACGATCTTCTTCAGATCCAGCCACTCAAGGCCTTAAGCATTCAGGAGTGCCCAGTG…	1602	G	T
isotig01478	TGTTGTCTGGACGGTCACTCGCGCTATAAATCAACCTGAGAGCAATTGAGCACTGCACACGCAGATTCAGAAGAAAATCAGAAGAGTTGAGACGCGAGGAACTGTTGTTGAGAAGCAGAAGAAGAGATGGCGGAGGGAAACGTGTTTGCATGTCACTCTACAGAGGCATGGCGCTCCAAGTTACAGGAGGCCATCGATACTAAACGCCTGGTGGTGGTTGATTTCACTGCTACGTGGTGTGGACCTTGTCGAATCATCAGTCCAGTGTTCGTGGAATTGTCGAAGAAATTCTCAGAAATATTTTTCTTGAAGGTCGATGTGGACGAATTGAGGGTACAGTCATTTAATCACTACCCTATAAATTATTGGTTGGAACTTGGATAGATATTTGAAATAGAA…	51	C	G
isotig01478	TGTTGTCTGGACGGTCACTCGCGCTATAAATCAACCTGAGAGCAATTGAGCACTGCACACGCAGATTCAGAAGAAAATCAGAAGAGTTGAGACGCGAGGAACTGTTGTTGAGAAGCAGAAGAAGAGATGGCGGAGGGAAACGTGTTTGCATGTCACTCTACAGAGGCATGGCGCTCCAAGTTACAGGAGGCCATCGATACTAAACGCCTGGTGGTGGTTGATTTCACTGCTACGTGGTGTGGACCTTGTCGAATCATCAGTCCAGTGTTCGTGGAATTGTCGAAGAAATTCTCAGAAATATTTTTCTTGAAGGTCGATGTGGACGAATTGAGGGTACAGTCATTTAATCACTACCCTATAAATTATTGGTTGGAACTTGGATAGATATTTGAAATAGAA…	258	C	T
isotig01478	TGTTGTCTGGACGGTCACTCGCGCTATAAATCAACCTGAGAGCAATTGAGCACTGCACACGCAGATTCAGAAGAAAATCAGAAGAGTTGAGACGCGAGGAACTGTTGTTGAGAAGCAGAAGAAGAGATGGCGGAGGGAAACGTGTTTGCATGTCACTCTACAGAGGCATGGCGCTCCAAGTTACAGGAGGCCATCGATACTAAACGCCTGGTGGTGGTTGATTTCACTGCTACGTGGTGTGGACCTTGTCGAATCATCAGTCCAGTGTTCGTGGAATTGTCGAAGAAATTCTCAGAAATATTTTTCTTGAAGGTCGATGTGGACGAATTGAGGGTACAGTCATTTAATCACTACCCTATAAATTATTGGTTGGAACTTGGATAGATATTTGAAATAGAA…	296	A	G
isotig01478	TGTTGTCTGGACGGTCACTCGCGCTATAAATCAACCTGAGAGCAATTGAGCACTGCACACGCAGATTCAGAAGAAAATCAGAAGAGTTGAGACGCGAGGAACTGTTGTTGAGAAGCAGAAGAAGAGATGGCGGAGGGAAACGTGTTTGCATGTCACTCTACAGAGGCATGGCGCTCCAAGTTACAGGAGGCCATCGATACTAAACGCCTGGTGGTGGTTGATTTCACTGCTACGTGGTGTGGACCTTGTCGAATCATCAGTCCAGTGTTCGTGGAATTGTCGAAGAAATTCTCAGAAATATTTTTCTTGAAGGTCGATGTGGACGAATTGAGGGTACAGTCATTTAATCACTACCCTATAAATTATTGGTTGGAACTTGGATAGATATTTGAAATAGAA…	297	A	T
isotig01478	TGTTGTCTGGACGGTCACTCGCGCTATAAATCAACCTGAGAGCAATTGAGCACTGCACACGCAGATTCAGAAGAAAATCAGAAGAGTTGAGACGCGAGGAACTGTTGTTGAGAAGCAGAAGAAGAGATGGCGGAGGGAAACGTGTTTGCATGTCACTCTACAGAGGCATGGCGCTCCAAGTTACAGGAGGCCATCGATACTAAACGCCTGGTGGTGGTTGATTTCACTGCTACGTGGTGTGGACCTTGTCGAATCATCAGTCCAGTGTTCGTGGAATTGTCGAAGAAATTCTCAGAAATATTTTTCTTGAAGGTCGATGTGGACGAATTGAGGGTACAGTCATTTAATCACTACCCTATAAATTATTGGTTGGAACTTGGATAGATATTTGAAATAGAA…	300	A	T
isotig01478	TGTTGTCTGGACGGTCACTCGCGCTATAAATCAACCTGAGAGCAATTGAGCACTGCACACGCAGATTCAGAAGAAAATCAGAAGAGTTGAGACGCGAGGAACTGTTGTTGAGAAGCAGAAGAAGAGATGGCGGAGGGAAACGTGTTTGCATGTCACTCTACAGAGGCATGGCGCTCCAAGTTACAGGAGGCCATCGATACTAAACGCCTGGTGGTGGTTGATTTCACTGCTACGTGGTGTGGACCTTGTCGAATCATCAGTCCAGTGTTCGTGGAATTGTCGAAGAAATTCTCAGAAATATTTTTCTTGAAGGTCGATGTGGACGAATTGAGGGTACAGTCATTTAATCACTACCCTATAAATTATTGGTTGGAACTTGGATAGATATTTGAAATAGAA…	450	G	T
isotig01478	TGTTGTCTGGACGGTCACTCGCGCTATAAATCAACCTGAGAGCAATTGAGCACTGCACACGCAGATTCAGAAGAAAATCAGAAGAGTTGAGACGCGAGGAACTGTTGTTGAGAAGCAGAAGAAGAGATGGCGGAGGGAAACGTGTTTGCATGTCACTCTACAGAGGCATGGCGCTCCAAGTTACAGGAGGCCATCGATACTAAACGCCTGGTGGTGGTTGATTTCACTGCTACGTGGTGTGGACCTTGTCGAATCATCAGTCCAGTGTTCGTGGAATTGTCGAAGAAATTCTCAGAAATATTTTTCTTGAAGGTCGATGTGGACGAATTGAGGGTACAGTCATTTAATCACTACCCTATAAATTATTGGTTGGAACTTGGATAGATATTTGAAATAGAA…	468	C	G
isotig01478	TGTTGTCTGGACGGTCACTCGCGCTATAAATCAACCTGAGAGCAATTGAGCACTGCACACGCAGATTCAGAAGAAAATCAGAAGAGTTGAGACGCGAGGAACTGTTGTTGAGAAGCAGAAGAAGAGATGGCGGAGGGAAACGTGTTTGCATGTCACTCTACAGAGGCATGGCGCTCCAAGTTACAGGAGGCCATCGATACTAAACGCCTGGTGGTGGTTGATTTCACTGCTACGTGGTGTGGACCTTGTCGAATCATCAGTCCAGTGTTCGTGGAATTGTCGAAGAAATTCTCAGAAATATTTTTCTTGAAGGTCGATGTGGACGAATTGAGGGTACAGTCATTTAATCACTACCCTATAAATTATTGGTTGGAACTTGGATAGATATTTGAAATAGAA…	486	G	A
isotig01478	TGTTGTCTGGACGGTCACTCGCGCTATAAATCAACCTGAGAGCAATTGAGCACTGCACACGCAGATTCAGAAGAAAATCAGAAGAGTTGAGACGCGAGGAACTGTTGTTGAGAAGCAGAAGAAGAGATGGCGGAGGGAAACGTGTTTGCATGTCACTCTACAGAGGCATGGCGCTCCAAGTTACAGGAGGCCATCGATACTAAACGCCTGGTGGTGGTTGATTTCACTGCTACGTGGTGTGGACCTTGTCGAATCATCAGTCCAGTGTTCGTGGAATTGTCGAAGAAATTCTCAGAAATATTTTTCTTGAAGGTCGATGTGGACGAATTGAGGGTACAGTCATTTAATCACTACCCTATAAATTATTGGTTGGAACTTGGATAGATATTTGAAATAGAA…	490	G	T
isotig01478	TGTTGTCTGGACGGTCACTCGCGCTATAAATCAACCTGAGAGCAATTGAGCACTGCACACGCAGATTCAGAAGAAAATCAGAAGAGTTGAGACGCGAGGAACTGTTGTTGAGAAGCAGAAGAAGAGATGGCGGAGGGAAACGTGTTTGCATGTCACTCTACAGAGGCATGGCGCTCCAAGTTACAGGAGGCCATCGATACTAAACGCCTGGTGGTGGTTGATTTCACTGCTACGTGGTGTGGACCTTGTCGAATCATCAGTCCAGTGTTCGTGGAATTGTCGAAGAAATTCTCAGAAATATTTTTCTTGAAGGTCGATGTGGACGAATTGAGGGTACAGTCATTTAATCACTACCCTATAAATTATTGGTTGGAACTTGGATAGATATTTGAAATAGAA…	496	T	A
isotig01478	TGTTGTCTGGACGGTCACTCGCGCTATAAATCAACCTGAGAGCAATTGAGCACTGCACACGCAGATTCAGAAGAAAATCAGAAGAGTTGAGACGCGAGGAACTGTTGTTGAGAAGCAGAAGAAGAGATGGCGGAGGGAAACGTGTTTGCATGTCACTCTACAGAGGCATGGCGCTCCAAGTTACAGGAGGCCATCGATACTAAACGCCTGGTGGTGGTTGATTTCACTGCTACGTGGTGTGGACCTTGTCGAATCATCAGTCCAGTGTTCGTGGAATTGTCGAAGAAATTCTCAGAAATATTTTTCTTGAAGGTCGATGTGGACGAATTGAGGGTACAGTCATTTAATCACTACCCTATAAATTATTGGTTGGAACTTGGATAGATATTTGAAATAGAA…	519	C	A
isotig01478	TGTTGTCTGGACGGTCACTCGCGCTATAAATCAACCTGAGAGCAATTGAGCACTGCACACGCAGATTCAGAAGAAAATCAGAAGAGTTGAGACGCGAGGAACTGTTGTTGAGAAGCAGAAGAAGAGATGGCGGAGGGAAACGTGTTTGCATGTCACTCTACAGAGGCATGGCGCTCCAAGTTACAGGAGGCCATCGATACTAAACGCCTGGTGGTGGTTGATTTCACTGCTACGTGGTGTGGACCTTGTCGAATCATCAGTCCAGTGTTCGTGGAATTGTCGAAGAAATTCTCAGAAATATTTTTCTTGAAGGTCGATGTGGACGAATTGAGGGTACAGTCATTTAATCACTACCCTATAAATTATTGGTTGGAACTTGGATAGATATTTGAAATAGAA…	534	T	C
isotig01478	TGTTGTCTGGACGGTCACTCGCGCTATAAATCAACCTGAGAGCAATTGAGCACTGCACACGCAGATTCAGAAGAAAATCAGAAGAGTTGAGACGCGAGGAACTGTTGTTGAGAAGCAGAAGAAGAGATGGCGGAGGGAAACGTGTTTGCATGTCACTCTACAGAGGCATGGCGCTCCAAGTTACAGGAGGCCATCGATACTAAACGCCTGGTGGTGGTTGATTTCACTGCTACGTGGTGTGGACCTTGTCGAATCATCAGTCCAGTGTTCGTGGAATTGTCGAAGAAATTCTCAGAAATATTTTTCTTGAAGGTCGATGTGGACGAATTGAGGGTACAGTCATTTAATCACTACCCTATAAATTATTGGTTGGAACTTGGATAGATATTTGAAATAGAA…	550	G	T
isotig01478	TGTTGTCTGGACGGTCACTCGCGCTATAAATCAACCTGAGAGCAATTGAGCACTGCACACGCAGATTCAGAAGAAAATCAGAAGAGTTGAGACGCGAGGAACTGTTGTTGAGAAGCAGAAGAAGAGATGGCGGAGGGAAACGTGTTTGCATGTCACTCTACAGAGGCATGGCGCTCCAAGTTACAGGAGGCCATCGATACTAAACGCCTGGTGGTGGTTGATTTCACTGCTACGTGGTGTGGACCTTGTCGAATCATCAGTCCAGTGTTCGTGGAATTGTCGAAGAAATTCTCAGAAATATTTTTCTTGAAGGTCGATGTGGACGAATTGAGGGTACAGTCATTTAATCACTACCCTATAAATTATTGGTTGGAACTTGGATAGATATTTGAAATAGAA…	587	G	A
isotig01478	TGTTGTCTGGACGGTCACTCGCGCTATAAATCAACCTGAGAGCAATTGAGCACTGCACACGCAGATTCAGAAGAAAATCAGAAGAGTTGAGACGCGAGGAACTGTTGTTGAGAAGCAGAAGAAGAGATGGCGGAGGGAAACGTGTTTGCATGTCACTCTACAGAGGCATGGCGCTCCAAGTTACAGGAGGCCATCGATACTAAACGCCTGGTGGTGGTTGATTTCACTGCTACGTGGTGTGGACCTTGTCGAATCATCAGTCCAGTGTTCGTGGAATTGTCGAAGAAATTCTCAGAAATATTTTTCTTGAAGGTCGATGTGGACGAATTGAGGGTACAGTCATTTAATCACTACCCTATAAATTATTGGTTGGAACTTGGATAGATATTTGAAATAGAA…	632	G	A
isotig01478	TGTTGTCTGGACGGTCACTCGCGCTATAAATCAACCTGAGAGCAATTGAGCACTGCACACGCAGATTCAGAAGAAAATCAGAAGAGTTGAGACGCGAGGAACTGTTGTTGAGAAGCAGAAGAAGAGATGGCGGAGGGAAACGTGTTTGCATGTCACTCTACAGAGGCATGGCGCTCCAAGTTACAGGAGGCCATCGATACTAAACGCCTGGTGGTGGTTGATTTCACTGCTACGTGGTGTGGACCTTGTCGAATCATCAGTCCAGTGTTCGTGGAATTGTCGAAGAAATTCTCAGAAATATTTTTCTTGAAGGTCGATGTGGACGAATTGAGGGTACAGTCATTTAATCACTACCCTATAAATTATTGGTTGGAACTTGGATAGATATTTGAAATAGAA…	728	C	T
isotig01478	TGTTGTCTGGACGGTCACTCGCGCTATAAATCAACCTGAGAGCAATTGAGCACTGCACACGCAGATTCAGAAGAAAATCAGAAGAGTTGAGACGCGAGGAACTGTTGTTGAGAAGCAGAAGAAGAGATGGCGGAGGGAAACGTGTTTGCATGTCACTCTACAGAGGCATGGCGCTCCAAGTTACAGGAGGCCATCGATACTAAACGCCTGGTGGTGGTTGATTTCACTGCTACGTGGTGTGGACCTTGTCGAATCATCAGTCCAGTGTTCGTGGAATTGTCGAAGAAATTCTCAGAAATATTTTTCTTGAAGGTCGATGTGGACGAATTGAGGGTACAGTCATTTAATCACTACCCTATAAATTATTGGTTGGAACTTGGATAGATATTTGAAATAGAA…	961	A	G
isotig01478	TGTTGTCTGGACGGTCACTCGCGCTATAAATCAACCTGAGAGCAATTGAGCACTGCACACGCAGATTCAGAAGAAAATCAGAAGAGTTGAGACGCGAGGAACTGTTGTTGAGAAGCAGAAGAAGAGATGGCGGAGGGAAACGTGTTTGCATGTCACTCTACAGAGGCATGGCGCTCCAAGTTACAGGAGGCCATCGATACTAAACGCCTGGTGGTGGTTGATTTCACTGCTACGTGGTGTGGACCTTGTCGAATCATCAGTCCAGTGTTCGTGGAATTGTCGAAGAAATTCTCAGAAATATTTTTCTTGAAGGTCGATGTGGACGAATTGAGGGTACAGTCATTTAATCACTACCCTATAAATTATTGGTTGGAACTTGGATAGATATTTGAAATAGAA…	1014	G	A
isotig01478	TGTTGTCTGGACGGTCACTCGCGCTATAAATCAACCTGAGAGCAATTGAGCACTGCACACGCAGATTCAGAAGAAAATCAGAAGAGTTGAGACGCGAGGAACTGTTGTTGAGAAGCAGAAGAAGAGATGGCGGAGGGAAACGTGTTTGCATGTCACTCTACAGAGGCATGGCGCTCCAAGTTACAGGAGGCCATCGATACTAAACGCCTGGTGGTGGTTGATTTCACTGCTACGTGGTGTGGACCTTGTCGAATCATCAGTCCAGTGTTCGTGGAATTGTCGAAGAAATTCTCAGAAATATTTTTCTTGAAGGTCGATGTGGACGAATTGAGGGTACAGTCATTTAATCACTACCCTATAAATTATTGGTTGGAACTTGGATAGATATTTGAAATAGAA…	1042	A	G
isotig01478	TGTTGTCTGGACGGTCACTCGCGCTATAAATCAACCTGAGAGCAATTGAGCACTGCACACGCAGATTCAGAAGAAAATCAGAAGAGTTGAGACGCGAGGAACTGTTGTTGAGAAGCAGAAGAAGAGATGGCGGAGGGAAACGTGTTTGCATGTCACTCTACAGAGGCATGGCGCTCCAAGTTACAGGAGGCCATCGATACTAAACGCCTGGTGGTGGTTGATTTCACTGCTACGTGGTGTGGACCTTGTCGAATCATCAGTCCAGTGTTCGTGGAATTGTCGAAGAAATTCTCAGAAATATTTTTCTTGAAGGTCGATGTGGACGAATTGAGGGTACAGTCATTTAATCACTACCCTATAAATTATTGGTTGGAACTTGGATAGATATTTGAAATAGAA…	1063	G	A
isotig01478	TGTTGTCTGGACGGTCACTCGCGCTATAAATCAACCTGAGAGCAATTGAGCACTGCACACGCAGATTCAGAAGAAAATCAGAAGAGTTGAGACGCGAGGAACTGTTGTTGAGAAGCAGAAGAAGAGATGGCGGAGGGAAACGTGTTTGCATGTCACTCTACAGAGGCATGGCGCTCCAAGTTACAGGAGGCCATCGATACTAAACGCCTGGTGGTGGTTGATTTCACTGCTACGTGGTGTGGACCTTGTCGAATCATCAGTCCAGTGTTCGTGGAATTGTCGAAGAAATTCTCAGAAATATTTTTCTTGAAGGTCGATGTGGACGAATTGAGGGTACAGTCATTTAATCACTACCCTATAAATTATTGGTTGGAACTTGGATAGATATTTGAAATAGAA…	1066	T	C
isotig01478	TGTTGTCTGGACGGTCACTCGCGCTATAAATCAACCTGAGAGCAATTGAGCACTGCACACGCAGATTCAGAAGAAAATCAGAAGAGTTGAGACGCGAGGAACTGTTGTTGAGAAGCAGAAGAAGAGATGGCGGAGGGAAACGTGTTTGCATGTCACTCTACAGAGGCATGGCGCTCCAAGTTACAGGAGGCCATCGATACTAAACGCCTGGTGGTGGTTGATTTCACTGCTACGTGGTGTGGACCTTGTCGAATCATCAGTCCAGTGTTCGTGGAATTGTCGAAGAAATTCTCAGAAATATTTTTCTTGAAGGTCGATGTGGACGAATTGAGGGTACAGTCATTTAATCACTACCCTATAAATTATTGGTTGGAACTTGGATAGATATTTGAAATAGAA…	1073	A	C
isotig01478	TGTTGTCTGGACGGTCACTCGCGCTATAAATCAACCTGAGAGCAATTGAGCACTGCACACGCAGATTCAGAAGAAAATCAGAAGAGTTGAGACGCGAGGAACTGTTGTTGAGAAGCAGAAGAAGAGATGGCGGAGGGAAACGTGTTTGCATGTCACTCTACAGAGGCATGGCGCTCCAAGTTACAGGAGGCCATCGATACTAAACGCCTGGTGGTGGTTGATTTCACTGCTACGTGGTGTGGACCTTGTCGAATCATCAGTCCAGTGTTCGTGGAATTGTCGAAGAAATTCTCAGAAATATTTTTCTTGAAGGTCGATGTGGACGAATTGAGGGTACAGTCATTTAATCACTACCCTATAAATTATTGGTTGGAACTTGGATAGATATTTGAAATAGAA…	1076	C	T
isotig01478	TGTTGTCTGGACGGTCACTCGCGCTATAAATCAACCTGAGAGCAATTGAGCACTGCACACGCAGATTCAGAAGAAAATCAGAAGAGTTGAGACGCGAGGAACTGTTGTTGAGAAGCAGAAGAAGAGATGGCGGAGGGAAACGTGTTTGCATGTCACTCTACAGAGGCATGGCGCTCCAAGTTACAGGAGGCCATCGATACTAAACGCCTGGTGGTGGTTGATTTCACTGCTACGTGGTGTGGACCTTGTCGAATCATCAGTCCAGTGTTCGTGGAATTGTCGAAGAAATTCTCAGAAATATTTTTCTTGAAGGTCGATGTGGACGAATTGAGGGTACAGTCATTTAATCACTACCCTATAAATTATTGGTTGGAACTTGGATAGATATTTGAAATAGAA…	1078	A	G
isotig01478	TGTTGTCTGGACGGTCACTCGCGCTATAAATCAACCTGAGAGCAATTGAGCACTGCACACGCAGATTCAGAAGAAAATCAGAAGAGTTGAGACGCGAGGAACTGTTGTTGAGAAGCAGAAGAAGAGATGGCGGAGGGAAACGTGTTTGCATGTCACTCTACAGAGGCATGGCGCTCCAAGTTACAGGAGGCCATCGATACTAAACGCCTGGTGGTGGTTGATTTCACTGCTACGTGGTGTGGACCTTGTCGAATCATCAGTCCAGTGTTCGTGGAATTGTCGAAGAAATTCTCAGAAATATTTTTCTTGAAGGTCGATGTGGACGAATTGAGGGTACAGTCATTTAATCACTACCCTATAAATTATTGGTTGGAACTTGGATAGATATTTGAAATAGAA…	1087	T	C
isotig01478	TGTTGTCTGGACGGTCACTCGCGCTATAAATCAACCTGAGAGCAATTGAGCACTGCACACGCAGATTCAGAAGAAAATCAGAAGAGTTGAGACGCGAGGAACTGTTGTTGAGAAGCAGAAGAAGAGATGGCGGAGGGAAACGTGTTTGCATGTCACTCTACAGAGGCATGGCGCTCCAAGTTACAGGAGGCCATCGATACTAAACGCCTGGTGGTGGTTGATTTCACTGCTACGTGGTGTGGACCTTGTCGAATCATCAGTCCAGTGTTCGTGGAATTGTCGAAGAAATTCTCAGAAATATTTTTCTTGAAGGTCGATGTGGACGAATTGAGGGTACAGTCATTTAATCACTACCCTATAAATTATTGGTTGGAACTTGGATAGATATTTGAAATAGAA…	1091	C	T
isotig01478	TGTTGTCTGGACGGTCACTCGCGCTATAAATCAACCTGAGAGCAATTGAGCACTGCACACGCAGATTCAGAAGAAAATCAGAAGAGTTGAGACGCGAGGAACTGTTGTTGAGAAGCAGAAGAAGAGATGGCGGAGGGAAACGTGTTTGCATGTCACTCTACAGAGGCATGGCGCTCCAAGTTACAGGAGGCCATCGATACTAAACGCCTGGTGGTGGTTGATTTCACTGCTACGTGGTGTGGACCTTGTCGAATCATCAGTCCAGTGTTCGTGGAATTGTCGAAGAAATTCTCAGAAATATTTTTCTTGAAGGTCGATGTGGACGAATTGAGGGTACAGTCATTTAATCACTACCCTATAAATTATTGGTTGGAACTTGGATAGATATTTGAAATAGAA…	1121	T	C
isotig01478	TGTTGTCTGGACGGTCACTCGCGCTATAAATCAACCTGAGAGCAATTGAGCACTGCACACGCAGATTCAGAAGAAAATCAGAAGAGTTGAGACGCGAGGAACTGTTGTTGAGAAGCAGAAGAAGAGATGGCGGAGGGAAACGTGTTTGCATGTCACTCTACAGAGGCATGGCGCTCCAAGTTACAGGAGGCCATCGATACTAAACGCCTGGTGGTGGTTGATTTCACTGCTACGTGGTGTGGACCTTGTCGAATCATCAGTCCAGTGTTCGTGGAATTGTCGAAGAAATTCTCAGAAATATTTTTCTTGAAGGTCGATGTGGACGAATTGAGGGTACAGTCATTTAATCACTACCCTATAAATTATTGGTTGGAACTTGGATAGATATTTGAAATAGAA…	1132	C	T
isotig01478	TGTTGTCTGGACGGTCACTCGCGCTATAAATCAACCTGAGAGCAATTGAGCACTGCACACGCAGATTCAGAAGAAAATCAGAAGAGTTGAGACGCGAGGAACTGTTGTTGAGAAGCAGAAGAAGAGATGGCGGAGGGAAACGTGTTTGCATGTCACTCTACAGAGGCATGGCGCTCCAAGTTACAGGAGGCCATCGATACTAAACGCCTGGTGGTGGTTGATTTCACTGCTACGTGGTGTGGACCTTGTCGAATCATCAGTCCAGTGTTCGTGGAATTGTCGAAGAAATTCTCAGAAATATTTTTCTTGAAGGTCGATGTGGACGAATTGAGGGTACAGTCATTTAATCACTACCCTATAAATTATTGGTTGGAACTTGGATAGATATTTGAAATAGAA…	1159	G	A
isotig01478	TGTTGTCTGGACGGTCACTCGCGCTATAAATCAACCTGAGAGCAATTGAGCACTGCACACGCAGATTCAGAAGAAAATCAGAAGAGTTGAGACGCGAGGAACTGTTGTTGAGAAGCAGAAGAAGAGATGGCGGAGGGAAACGTGTTTGCATGTCACTCTACAGAGGCATGGCGCTCCAAGTTACAGGAGGCCATCGATACTAAACGCCTGGTGGTGGTTGATTTCACTGCTACGTGGTGTGGACCTTGTCGAATCATCAGTCCAGTGTTCGTGGAATTGTCGAAGAAATTCTCAGAAATATTTTTCTTGAAGGTCGATGTGGACGAATTGAGGGTACAGTCATTTAATCACTACCCTATAAATTATTGGTTGGAACTTGGATAGATATTTGAAATAGAA…	1184	C	T
isotig01478	TGTTGTCTGGACGGTCACTCGCGCTATAAATCAACCTGAGAGCAATTGAGCACTGCACACGCAGATTCAGAAGAAAATCAGAAGAGTTGAGACGCGAGGAACTGTTGTTGAGAAGCAGAAGAAGAGATGGCGGAGGGAAACGTGTTTGCATGTCACTCTACAGAGGCATGGCGCTCCAAGTTACAGGAGGCCATCGATACTAAACGCCTGGTGGTGGTTGATTTCACTGCTACGTGGTGTGGACCTTGTCGAATCATCAGTCCAGTGTTCGTGGAATTGTCGAAGAAATTCTCAGAAATATTTTTCTTGAAGGTCGATGTGGACGAATTGAGGGTACAGTCATTTAATCACTACCCTATAAATTATTGGTTGGAACTTGGATAGATATTTGAAATAGAA…	1209	C	T
isotig01532	CAAGAGGATGACTTTGAATCGGAACAGGTGGCTCTGCTAAGTAGGTTCCAAGAAGGGGACATTCAAAGATTCAATACATCAAGGATTCTATGGCTTGCAGATTGCCAAACCTGGTTATGTTAATGAAAATTTCAATTAGAGAATACAACTGAACTTTTAAAGTCAATTTTGGTTAATAGTAAATGCAAGGGCTTACTGATTCCTAGTGCTTCCAATAGTAAATTCGAATTTACTAAAATATAGAGACAGTAAGTTTTTGGTTATCGTAGGTTGTGTTAAAGTAATTAAACTAGAACATTCCACCACAATGGCTCTTGAATTTTTAGTATTAACAGTGTTAGGTACATTAAAATAGATGTCGGTAGTATTACTCCAAAGAAATATTTGTTTATTCCCACT…	709	G	A
isotig01532	CAAGAGGATGACTTTGAATCGGAACAGGTGGCTCTGCTAAGTAGGTTCCAAGAAGGGGACATTCAAAGATTCAATACATCAAGGATTCTATGGCTTGCAGATTGCCAAACCTGGTTATGTTAATGAAAATTTCAATTAGAGAATACAACTGAACTTTTAAAGTCAATTTTGGTTAATAGTAAATGCAAGGGCTTACTGATTCCTAGTGCTTCCAATAGTAAATTCGAATTTACTAAAATATAGAGACAGTAAGTTTTTGGTTATCGTAGGTTGTGTTAAAGTAATTAAACTAGAACATTCCACCACAATGGCTCTTGAATTTTTAGTATTAACAGTGTTAGGTACATTAAAATAGATGTCGGTAGTATTACTCCAAAGAAATATTTGTTTATTCCCACT…	715	G	A
isotig01532	CAAGAGGATGACTTTGAATCGGAACAGGTGGCTCTGCTAAGTAGGTTCCAAGAAGGGGACATTCAAAGATTCAATACATCAAGGATTCTATGGCTTGCAGATTGCCAAACCTGGTTATGTTAATGAAAATTTCAATTAGAGAATACAACTGAACTTTTAAAGTCAATTTTGGTTAATAGTAAATGCAAGGGCTTACTGATTCCTAGTGCTTCCAATAGTAAATTCGAATTTACTAAAATATAGAGACAGTAAGTTTTTGGTTATCGTAGGTTGTGTTAAAGTAATTAAACTAGAACATTCCACCACAATGGCTCTTGAATTTTTAGTATTAACAGTGTTAGGTACATTAAAATAGATGTCGGTAGTATTACTCCAAAGAAATATTTGTTTATTCCCACT…	719	T	C
isotig01532	CAAGAGGATGACTTTGAATCGGAACAGGTGGCTCTGCTAAGTAGGTTCCAAGAAGGGGACATTCAAAGATTCAATACATCAAGGATTCTATGGCTTGCAGATTGCCAAACCTGGTTATGTTAATGAAAATTTCAATTAGAGAATACAACTGAACTTTTAAAGTCAATTTTGGTTAATAGTAAATGCAAGGGCTTACTGATTCCTAGTGCTTCCAATAGTAAATTCGAATTTACTAAAATATAGAGACAGTAAGTTTTTGGTTATCGTAGGTTGTGTTAAAGTAATTAAACTAGAACATTCCACCACAATGGCTCTTGAATTTTTAGTATTAACAGTGTTAGGTACATTAAAATAGATGTCGGTAGTATTACTCCAAAGAAATATTTGTTTATTCCCACT…	726	T	C
isotig01532	CAAGAGGATGACTTTGAATCGGAACAGGTGGCTCTGCTAAGTAGGTTCCAAGAAGGGGACATTCAAAGATTCAATACATCAAGGATTCTATGGCTTGCAGATTGCCAAACCTGGTTATGTTAATGAAAATTTCAATTAGAGAATACAACTGAACTTTTAAAGTCAATTTTGGTTAATAGTAAATGCAAGGGCTTACTGATTCCTAGTGCTTCCAATAGTAAATTCGAATTTACTAAAATATAGAGACAGTAAGTTTTTGGTTATCGTAGGTTGTGTTAAAGTAATTAAACTAGAACATTCCACCACAATGGCTCTTGAATTTTTAGTATTAACAGTGTTAGGTACATTAAAATAGATGTCGGTAGTATTACTCCAAAGAAATATTTGTTTATTCCCACT…	1336	C	T
isotig01532	CAAGAGGATGACTTTGAATCGGAACAGGTGGCTCTGCTAAGTAGGTTCCAAGAAGGGGACATTCAAAGATTCAATACATCAAGGATTCTATGGCTTGCAGATTGCCAAACCTGGTTATGTTAATGAAAATTTCAATTAGAGAATACAACTGAACTTTTAAAGTCAATTTTGGTTAATAGTAAATGCAAGGGCTTACTGATTCCTAGTGCTTCCAATAGTAAATTCGAATTTACTAAAATATAGAGACAGTAAGTTTTTGGTTATCGTAGGTTGTGTTAAAGTAATTAAACTAGAACATTCCACCACAATGGCTCTTGAATTTTTAGTATTAACAGTGTTAGGTACATTAAAATAGATGTCGGTAGTATTACTCCAAAGAAATATTTGTTTATTCCCACT…	1358	A	G
isotig01532	CAAGAGGATGACTTTGAATCGGAACAGGTGGCTCTGCTAAGTAGGTTCCAAGAAGGGGACATTCAAAGATTCAATACATCAAGGATTCTATGGCTTGCAGATTGCCAAACCTGGTTATGTTAATGAAAATTTCAATTAGAGAATACAACTGAACTTTTAAAGTCAATTTTGGTTAATAGTAAATGCAAGGGCTTACTGATTCCTAGTGCTTCCAATAGTAAATTCGAATTTACTAAAATATAGAGACAGTAAGTTTTTGGTTATCGTAGGTTGTGTTAAAGTAATTAAACTAGAACATTCCACCACAATGGCTCTTGAATTTTTAGTATTAACAGTGTTAGGTACATTAAAATAGATGTCGGTAGTATTACTCCAAAGAAATATTTGTTTATTCCCACT…	1584	T	A
isotig01532	CAAGAGGATGACTTTGAATCGGAACAGGTGGCTCTGCTAAGTAGGTTCCAAGAAGGGGACATTCAAAGATTCAATACATCAAGGATTCTATGGCTTGCAGATTGCCAAACCTGGTTATGTTAATGAAAATTTCAATTAGAGAATACAACTGAACTTTTAAAGTCAATTTTGGTTAATAGTAAATGCAAGGGCTTACTGATTCCTAGTGCTTCCAATAGTAAATTCGAATTTACTAAAATATAGAGACAGTAAGTTTTTGGTTATCGTAGGTTGTGTTAAAGTAATTAAACTAGAACATTCCACCACAATGGCTCTTGAATTTTTAGTATTAACAGTGTTAGGTACATTAAAATAGATGTCGGTAGTATTACTCCAAAGAAATATTTGTTTATTCCCACT…	1590	C	T
isotig01532	CAAGAGGATGACTTTGAATCGGAACAGGTGGCTCTGCTAAGTAGGTTCCAAGAAGGGGACATTCAAAGATTCAATACATCAAGGATTCTATGGCTTGCAGATTGCCAAACCTGGTTATGTTAATGAAAATTTCAATTAGAGAATACAACTGAACTTTTAAAGTCAATTTTGGTTAATAGTAAATGCAAGGGCTTACTGATTCCTAGTGCTTCCAATAGTAAATTCGAATTTACTAAAATATAGAGACAGTAAGTTTTTGGTTATCGTAGGTTGTGTTAAAGTAATTAAACTAGAACATTCCACCACAATGGCTCTTGAATTTTTAGTATTAACAGTGTTAGGTACATTAAAATAGATGTCGGTAGTATTACTCCAAAGAAATATTTGTTTATTCCCACT…	1625	A	C
isotig01532	CAAGAGGATGACTTTGAATCGGAACAGGTGGCTCTGCTAAGTAGGTTCCAAGAAGGGGACATTCAAAGATTCAATACATCAAGGATTCTATGGCTTGCAGATTGCCAAACCTGGTTATGTTAATGAAAATTTCAATTAGAGAATACAACTGAACTTTTAAAGTCAATTTTGGTTAATAGTAAATGCAAGGGCTTACTGATTCCTAGTGCTTCCAATAGTAAATTCGAATTTACTAAAATATAGAGACAGTAAGTTTTTGGTTATCGTAGGTTGTGTTAAAGTAATTAAACTAGAACATTCCACCACAATGGCTCTTGAATTTTTAGTATTAACAGTGTTAGGTACATTAAAATAGATGTCGGTAGTATTACTCCAAAGAAATATTTGTTTATTCCCACT…	1626	A	C
isotig01532	CAAGAGGATGACTTTGAATCGGAACAGGTGGCTCTGCTAAGTAGGTTCCAAGAAGGGGACATTCAAAGATTCAATACATCAAGGATTCTATGGCTTGCAGATTGCCAAACCTGGTTATGTTAATGAAAATTTCAATTAGAGAATACAACTGAACTTTTAAAGTCAATTTTGGTTAATAGTAAATGCAAGGGCTTACTGATTCCTAGTGCTTCCAATAGTAAATTCGAATTTACTAAAATATAGAGACAGTAAGTTTTTGGTTATCGTAGGTTGTGTTAAAGTAATTAAACTAGAACATTCCACCACAATGGCTCTTGAATTTTTAGTATTAACAGTGTTAGGTACATTAAAATAGATGTCGGTAGTATTACTCCAAAGAAATATTTGTTTATTCCCACT…	1637	T	G
isotig01532	CAAGAGGATGACTTTGAATCGGAACAGGTGGCTCTGCTAAGTAGGTTCCAAGAAGGGGACATTCAAAGATTCAATACATCAAGGATTCTATGGCTTGCAGATTGCCAAACCTGGTTATGTTAATGAAAATTTCAATTAGAGAATACAACTGAACTTTTAAAGTCAATTTTGGTTAATAGTAAATGCAAGGGCTTACTGATTCCTAGTGCTTCCAATAGTAAATTCGAATTTACTAAAATATAGAGACAGTAAGTTTTTGGTTATCGTAGGTTGTGTTAAAGTAATTAAACTAGAACATTCCACCACAATGGCTCTTGAATTTTTAGTATTAACAGTGTTAGGTACATTAAAATAGATGTCGGTAGTATTACTCCAAAGAAATATTTGTTTATTCCCACT…	1709	T	C
isotig01532	CAAGAGGATGACTTTGAATCGGAACAGGTGGCTCTGCTAAGTAGGTTCCAAGAAGGGGACATTCAAAGATTCAATACATCAAGGATTCTATGGCTTGCAGATTGCCAAACCTGGTTATGTTAATGAAAATTTCAATTAGAGAATACAACTGAACTTTTAAAGTCAATTTTGGTTAATAGTAAATGCAAGGGCTTACTGATTCCTAGTGCTTCCAATAGTAAATTCGAATTTACTAAAATATAGAGACAGTAAGTTTTTGGTTATCGTAGGTTGTGTTAAAGTAATTAAACTAGAACATTCCACCACAATGGCTCTTGAATTTTTAGTATTAACAGTGTTAGGTACATTAAAATAGATGTCGGTAGTATTACTCCAAAGAAATATTTGTTTATTCCCACT…	2147	A	G
isotig01532	CAAGAGGATGACTTTGAATCGGAACAGGTGGCTCTGCTAAGTAGGTTCCAAGAAGGGGACATTCAAAGATTCAATACATCAAGGATTCTATGGCTTGCAGATTGCCAAACCTGGTTATGTTAATGAAAATTTCAATTAGAGAATACAACTGAACTTTTAAAGTCAATTTTGGTTAATAGTAAATGCAAGGGCTTACTGATTCCTAGTGCTTCCAATAGTAAATTCGAATTTACTAAAATATAGAGACAGTAAGTTTTTGGTTATCGTAGGTTGTGTTAAAGTAATTAAACTAGAACATTCCACCACAATGGCTCTTGAATTTTTAGTATTAACAGTGTTAGGTACATTAAAATAGATGTCGGTAGTATTACTCCAAAGAAATATTTGTTTATTCCCACT…	2280	A	G
isotig01532	CAAGAGGATGACTTTGAATCGGAACAGGTGGCTCTGCTAAGTAGGTTCCAAGAAGGGGACATTCAAAGATTCAATACATCAAGGATTCTATGGCTTGCAGATTGCCAAACCTGGTTATGTTAATGAAAATTTCAATTAGAGAATACAACTGAACTTTTAAAGTCAATTTTGGTTAATAGTAAATGCAAGGGCTTACTGATTCCTAGTGCTTCCAATAGTAAATTCGAATTTACTAAAATATAGAGACAGTAAGTTTTTGGTTATCGTAGGTTGTGTTAAAGTAATTAAACTAGAACATTCCACCACAATGGCTCTTGAATTTTTAGTATTAACAGTGTTAGGTACATTAAAATAGATGTCGGTAGTATTACTCCAAAGAAATATTTGTTTATTCCCACT…	2321	A	T
isotig01532	CAAGAGGATGACTTTGAATCGGAACAGGTGGCTCTGCTAAGTAGGTTCCAAGAAGGGGACATTCAAAGATTCAATACATCAAGGATTCTATGGCTTGCAGATTGCCAAACCTGGTTATGTTAATGAAAATTTCAATTAGAGAATACAACTGAACTTTTAAAGTCAATTTTGGTTAATAGTAAATGCAAGGGCTTACTGATTCCTAGTGCTTCCAATAGTAAATTCGAATTTACTAAAATATAGAGACAGTAAGTTTTTGGTTATCGTAGGTTGTGTTAAAGTAATTAAACTAGAACATTCCACCACAATGGCTCTTGAATTTTTAGTATTAACAGTGTTAGGTACATTAAAATAGATGTCGGTAGTATTACTCCAAAGAAATATTTGTTTATTCCCACT…	2323	A	C
isotig01532	CAAGAGGATGACTTTGAATCGGAACAGGTGGCTCTGCTAAGTAGGTTCCAAGAAGGGGACATTCAAAGATTCAATACATCAAGGATTCTATGGCTTGCAGATTGCCAAACCTGGTTATGTTAATGAAAATTTCAATTAGAGAATACAACTGAACTTTTAAAGTCAATTTTGGTTAATAGTAAATGCAAGGGCTTACTGATTCCTAGTGCTTCCAATAGTAAATTCGAATTTACTAAAATATAGAGACAGTAAGTTTTTGGTTATCGTAGGTTGTGTTAAAGTAATTAAACTAGAACATTCCACCACAATGGCTCTTGAATTTTTAGTATTAACAGTGTTAGGTACATTAAAATAGATGTCGGTAGTATTACTCCAAAGAAATATTTGTTTATTCCCACT…	2573	A	T
isotig01532	CAAGAGGATGACTTTGAATCGGAACAGGTGGCTCTGCTAAGTAGGTTCCAAGAAGGGGACATTCAAAGATTCAATACATCAAGGATTCTATGGCTTGCAGATTGCCAAACCTGGTTATGTTAATGAAAATTTCAATTAGAGAATACAACTGAACTTTTAAAGTCAATTTTGGTTAATAGTAAATGCAAGGGCTTACTGATTCCTAGTGCTTCCAATAGTAAATTCGAATTTACTAAAATATAGAGACAGTAAGTTTTTGGTTATCGTAGGTTGTGTTAAAGTAATTAAACTAGAACATTCCACCACAATGGCTCTTGAATTTTTAGTATTAACAGTGTTAGGTACATTAAAATAGATGTCGGTAGTATTACTCCAAAGAAATATTTGTTTATTCCCACT…	2577	A	C
isotig01532	CAAGAGGATGACTTTGAATCGGAACAGGTGGCTCTGCTAAGTAGGTTCCAAGAAGGGGACATTCAAAGATTCAATACATCAAGGATTCTATGGCTTGCAGATTGCCAAACCTGGTTATGTTAATGAAAATTTCAATTAGAGAATACAACTGAACTTTTAAAGTCAATTTTGGTTAATAGTAAATGCAAGGGCTTACTGATTCCTAGTGCTTCCAATAGTAAATTCGAATTTACTAAAATATAGAGACAGTAAGTTTTTGGTTATCGTAGGTTGTGTTAAAGTAATTAAACTAGAACATTCCACCACAATGGCTCTTGAATTTTTAGTATTAACAGTGTTAGGTACATTAAAATAGATGTCGGTAGTATTACTCCAAAGAAATATTTGTTTATTCCCACT…	2772	T	A
isotig01532	CAAGAGGATGACTTTGAATCGGAACAGGTGGCTCTGCTAAGTAGGTTCCAAGAAGGGGACATTCAAAGATTCAATACATCAAGGATTCTATGGCTTGCAGATTGCCAAACCTGGTTATGTTAATGAAAATTTCAATTAGAGAATACAACTGAACTTTTAAAGTCAATTTTGGTTAATAGTAAATGCAAGGGCTTACTGATTCCTAGTGCTTCCAATAGTAAATTCGAATTTACTAAAATATAGAGACAGTAAGTTTTTGGTTATCGTAGGTTGTGTTAAAGTAATTAAACTAGAACATTCCACCACAATGGCTCTTGAATTTTTAGTATTAACAGTGTTAGGTACATTAAAATAGATGTCGGTAGTATTACTCCAAAGAAATATTTGTTTATTCCCACT…	2812	G	A
isotig01532	CAAGAGGATGACTTTGAATCGGAACAGGTGGCTCTGCTAAGTAGGTTCCAAGAAGGGGACATTCAAAGATTCAATACATCAAGGATTCTATGGCTTGCAGATTGCCAAACCTGGTTATGTTAATGAAAATTTCAATTAGAGAATACAACTGAACTTTTAAAGTCAATTTTGGTTAATAGTAAATGCAAGGGCTTACTGATTCCTAGTGCTTCCAATAGTAAATTCGAATTTACTAAAATATAGAGACAGTAAGTTTTTGGTTATCGTAGGTTGTGTTAAAGTAATTAAACTAGAACATTCCACCACAATGGCTCTTGAATTTTTAGTATTAACAGTGTTAGGTACATTAAAATAGATGTCGGTAGTATTACTCCAAAGAAATATTTGTTTATTCCCACT…	2823	G	T
isotig01532	CAAGAGGATGACTTTGAATCGGAACAGGTGGCTCTGCTAAGTAGGTTCCAAGAAGGGGACATTCAAAGATTCAATACATCAAGGATTCTATGGCTTGCAGATTGCCAAACCTGGTTATGTTAATGAAAATTTCAATTAGAGAATACAACTGAACTTTTAAAGTCAATTTTGGTTAATAGTAAATGCAAGGGCTTACTGATTCCTAGTGCTTCCAATAGTAAATTCGAATTTACTAAAATATAGAGACAGTAAGTTTTTGGTTATCGTAGGTTGTGTTAAAGTAATTAAACTAGAACATTCCACCACAATGGCTCTTGAATTTTTAGTATTAACAGTGTTAGGTACATTAAAATAGATGTCGGTAGTATTACTCCAAAGAAATATTTGTTTATTCCCACT…	2979	C	T
isotig01532	CAAGAGGATGACTTTGAATCGGAACAGGTGGCTCTGCTAAGTAGGTTCCAAGAAGGGGACATTCAAAGATTCAATACATCAAGGATTCTATGGCTTGCAGATTGCCAAACCTGGTTATGTTAATGAAAATTTCAATTAGAGAATACAACTGAACTTTTAAAGTCAATTTTGGTTAATAGTAAATGCAAGGGCTTACTGATTCCTAGTGCTTCCAATAGTAAATTCGAATTTACTAAAATATAGAGACAGTAAGTTTTTGGTTATCGTAGGTTGTGTTAAAGTAATTAAACTAGAACATTCCACCACAATGGCTCTTGAATTTTTAGTATTAACAGTGTTAGGTACATTAAAATAGATGTCGGTAGTATTACTCCAAAGAAATATTTGTTTATTCCCACT…	2984	T	G
isotig01532	CAAGAGGATGACTTTGAATCGGAACAGGTGGCTCTGCTAAGTAGGTTCCAAGAAGGGGACATTCAAAGATTCAATACATCAAGGATTCTATGGCTTGCAGATTGCCAAACCTGGTTATGTTAATGAAAATTTCAATTAGAGAATACAACTGAACTTTTAAAGTCAATTTTGGTTAATAGTAAATGCAAGGGCTTACTGATTCCTAGTGCTTCCAATAGTAAATTCGAATTTACTAAAATATAGAGACAGTAAGTTTTTGGTTATCGTAGGTTGTGTTAAAGTAATTAAACTAGAACATTCCACCACAATGGCTCTTGAATTTTTAGTATTAACAGTGTTAGGTACATTAAAATAGATGTCGGTAGTATTACTCCAAAGAAATATTTGTTTATTCCCACT…	2999	G	T
isotig01649	GAGATGGAATTGCAAATAAATTCATATGATGGAAAATAGTTCAAATAACTAAGAACAATAGCATTACCAGCCCAATATTCCGTGACATGATTGTTCAAAGAACTGTAATTAAGGACAATAAGATTATTAACCCAACCTATGTGAGTAAAGCTCTTTACAATCTACAGGGGTTTTACCCAAAAATTGAATCTGATGCAATTTATGGAAATCTGGGCGCAAAGGTACCTCCTTACTTTCAGGACTCTATAACAGGTGTAAAATCTACGAAGGAATCTTAAAACAATGACCGAGGGCAGAGTGTTTGGGTTCCGGGGGGAGTCAATTCAAACAATACCCGAGGGTAACCACACGGGTACTTCTACCAAACGATCGACTCGTCACTGGCTGTTGCTCGATTAT…	110	T	C
isotig01649	GAGATGGAATTGCAAATAAATTCATATGATGGAAAATAGTTCAAATAACTAAGAACAATAGCATTACCAGCCCAATATTCCGTGACATGATTGTTCAAAGAACTGTAATTAAGGACAATAAGATTATTAACCCAACCTATGTGAGTAAAGCTCTTTACAATCTACAGGGGTTTTACCCAAAAATTGAATCTGATGCAATTTATGGAAATCTGGGCGCAAAGGTACCTCCTTACTTTCAGGACTCTATAACAGGTGTAAAATCTACGAAGGAATCTTAAAACAATGACCGAGGGCAGAGTGTTTGGGTTCCGGGGGGAGTCAATTCAAACAATACCCGAGGGTAACCACACGGGTACTTCTACCAAACGATCGACTCGTCACTGGCTGTTGCTCGATTAT…	175	A	C
isotig01649	GAGATGGAATTGCAAATAAATTCATATGATGGAAAATAGTTCAAATAACTAAGAACAATAGCATTACCAGCCCAATATTCCGTGACATGATTGTTCAAAGAACTGTAATTAAGGACAATAAGATTATTAACCCAACCTATGTGAGTAAAGCTCTTTACAATCTACAGGGGTTTTACCCAAAAATTGAATCTGATGCAATTTATGGAAATCTGGGCGCAAAGGTACCTCCTTACTTTCAGGACTCTATAACAGGTGTAAAATCTACGAAGGAATCTTAAAACAATGACCGAGGGCAGAGTGTTTGGGTTCCGGGGGGAGTCAATTCAAACAATACCCGAGGGTAACCACACGGGTACTTCTACCAAACGATCGACTCGTCACTGGCTGTTGCTCGATTAT…	242	C	A
isotig01649	GAGATGGAATTGCAAATAAATTCATATGATGGAAAATAGTTCAAATAACTAAGAACAATAGCATTACCAGCCCAATATTCCGTGACATGATTGTTCAAAGAACTGTAATTAAGGACAATAAGATTATTAACCCAACCTATGTGAGTAAAGCTCTTTACAATCTACAGGGGTTTTACCCAAAAATTGAATCTGATGCAATTTATGGAAATCTGGGCGCAAAGGTACCTCCTTACTTTCAGGACTCTATAACAGGTGTAAAATCTACGAAGGAATCTTAAAACAATGACCGAGGGCAGAGTGTTTGGGTTCCGGGGGGAGTCAATTCAAACAATACCCGAGGGTAACCACACGGGTACTTCTACCAAACGATCGACTCGTCACTGGCTGTTGCTCGATTAT…	244	C	G
isotig01737	CCAATTGTTGTGGTGTAACCCTTGTAGGTTGTGGAAGGCTAGGAGAAACAACACTTCCATCTTTATAGTTGTGAGGGGTAGACTTCCTTGTTGCCATAATTTTACTTTCCACTATGTAACAAAGCCCTTTTACTCTAACTTGTGAGGGGTAGACTTCCTTGTTGCCATAATTTTACTTTCCACTATGTAACAAAGCCCTTTTACTCTTTCCAATTGTTGTGGTGTTGCTCTAAAGAAGGTGTTGCTCTTTGTACCCTCATAATGTGCTATCATTTCCTTCGTGAAAATTGACCACGTAACAAGTTGTTTACGAGAACAAAGCTCTTTATACCATAAAAATTGATCTGGTTCTAAATATGAAGATGCAATGCATACCTTTTGTAACAGTGGTACACCATG…	926	G	A
isotig01737	CCAATTGTTGTGGTGTAACCCTTGTAGGTTGTGGAAGGCTAGGAGAAACAACACTTCCATCTTTATAGTTGTGAGGGGTAGACTTCCTTGTTGCCATAATTTTACTTTCCACTATGTAACAAAGCCCTTTTACTCTAACTTGTGAGGGGTAGACTTCCTTGTTGCCATAATTTTACTTTCCACTATGTAACAAAGCCCTTTTACTCTTTCCAATTGTTGTGGTGTTGCTCTAAAGAAGGTGTTGCTCTTTGTACCCTCATAATGTGCTATCATTTCCTTCGTGAAAATTGACCACGTAACAAGTTGTTTACGAGAACAAAGCTCTTTATACCATAAAAATTGATCTGGTTCTAAATATGAAGATGCAATGCATACCTTTTGTAACAGTGGTACACCATG…	988	C	A
isotig01737	CCAATTGTTGTGGTGTAACCCTTGTAGGTTGTGGAAGGCTAGGAGAAACAACACTTCCATCTTTATAGTTGTGAGGGGTAGACTTCCTTGTTGCCATAATTTTACTTTCCACTATGTAACAAAGCCCTTTTACTCTAACTTGTGAGGGGTAGACTTCCTTGTTGCCATAATTTTACTTTCCACTATGTAACAAAGCCCTTTTACTCTTTCCAATTGTTGTGGTGTTGCTCTAAAGAAGGTGTTGCTCTTTGTACCCTCATAATGTGCTATCATTTCCTTCGTGAAAATTGACCACGTAACAAGTTGTTTACGAGAACAAAGCTCTTTATACCATAAAAATTGATCTGGTTCTAAATATGAAGATGCAATGCATACCTTTTGTAACAGTGGTACACCATG…	1090	T	G
isotig01737	CCAATTGTTGTGGTGTAACCCTTGTAGGTTGTGGAAGGCTAGGAGAAACAACACTTCCATCTTTATAGTTGTGAGGGGTAGACTTCCTTGTTGCCATAATTTTACTTTCCACTATGTAACAAAGCCCTTTTACTCTAACTTGTGAGGGGTAGACTTCCTTGTTGCCATAATTTTACTTTCCACTATGTAACAAAGCCCTTTTACTCTTTCCAATTGTTGTGGTGTTGCTCTAAAGAAGGTGTTGCTCTTTGTACCCTCATAATGTGCTATCATTTCCTTCGTGAAAATTGACCACGTAACAAGTTGTTTACGAGAACAAAGCTCTTTATACCATAAAAATTGATCTGGTTCTAAATATGAAGATGCAATGCATACCTTTTGTAACAGTGGTACACCATG…	1123	G	C
isotig01737	CCAATTGTTGTGGTGTAACCCTTGTAGGTTGTGGAAGGCTAGGAGAAACAACACTTCCATCTTTATAGTTGTGAGGGGTAGACTTCCTTGTTGCCATAATTTTACTTTCCACTATGTAACAAAGCCCTTTTACTCTAACTTGTGAGGGGTAGACTTCCTTGTTGCCATAATTTTACTTTCCACTATGTAACAAAGCCCTTTTACTCTTTCCAATTGTTGTGGTGTTGCTCTAAAGAAGGTGTTGCTCTTTGTACCCTCATAATGTGCTATCATTTCCTTCGTGAAAATTGACCACGTAACAAGTTGTTTACGAGAACAAAGCTCTTTATACCATAAAAATTGATCTGGTTCTAAATATGAAGATGCAATGCATACCTTTTGTAACAGTGGTACACCATG…	1163	T	G
isotig01737	CCAATTGTTGTGGTGTAACCCTTGTAGGTTGTGGAAGGCTAGGAGAAACAACACTTCCATCTTTATAGTTGTGAGGGGTAGACTTCCTTGTTGCCATAATTTTACTTTCCACTATGTAACAAAGCCCTTTTACTCTAACTTGTGAGGGGTAGACTTCCTTGTTGCCATAATTTTACTTTCCACTATGTAACAAAGCCCTTTTACTCTTTCCAATTGTTGTGGTGTTGCTCTAAAGAAGGTGTTGCTCTTTGTACCCTCATAATGTGCTATCATTTCCTTCGTGAAAATTGACCACGTAACAAGTTGTTTACGAGAACAAAGCTCTTTATACCATAAAAATTGATCTGGTTCTAAATATGAAGATGCAATGCATACCTTTTGTAACAGTGGTACACCATG…	1258	G	A
isotig01737	CCAATTGTTGTGGTGTAACCCTTGTAGGTTGTGGAAGGCTAGGAGAAACAACACTTCCATCTTTATAGTTGTGAGGGGTAGACTTCCTTGTTGCCATAATTTTACTTTCCACTATGTAACAAAGCCCTTTTACTCTAACTTGTGAGGGGTAGACTTCCTTGTTGCCATAATTTTACTTTCCACTATGTAACAAAGCCCTTTTACTCTTTCCAATTGTTGTGGTGTTGCTCTAAAGAAGGTGTTGCTCTTTGTACCCTCATAATGTGCTATCATTTCCTTCGTGAAAATTGACCACGTAACAAGTTGTTTACGAGAACAAAGCTCTTTATACCATAAAAATTGATCTGGTTCTAAATATGAAGATGCAATGCATACCTTTTGTAACAGTGGTACACCATG…	1259	C	A
isotig01737	CCAATTGTTGTGGTGTAACCCTTGTAGGTTGTGGAAGGCTAGGAGAAACAACACTTCCATCTTTATAGTTGTGAGGGGTAGACTTCCTTGTTGCCATAATTTTACTTTCCACTATGTAACAAAGCCCTTTTACTCTAACTTGTGAGGGGTAGACTTCCTTGTTGCCATAATTTTACTTTCCACTATGTAACAAAGCCCTTTTACTCTTTCCAATTGTTGTGGTGTTGCTCTAAAGAAGGTGTTGCTCTTTGTACCCTCATAATGTGCTATCATTTCCTTCGTGAAAATTGACCACGTAACAAGTTGTTTACGAGAACAAAGCTCTTTATACCATAAAAATTGATCTGGTTCTAAATATGAAGATGCAATGCATACCTTTTGTAACAGTGGTACACCATG…	1322	C	T
isotig01737	CCAATTGTTGTGGTGTAACCCTTGTAGGTTGTGGAAGGCTAGGAGAAACAACACTTCCATCTTTATAGTTGTGAGGGGTAGACTTCCTTGTTGCCATAATTTTACTTTCCACTATGTAACAAAGCCCTTTTACTCTAACTTGTGAGGGGTAGACTTCCTTGTTGCCATAATTTTACTTTCCACTATGTAACAAAGCCCTTTTACTCTTTCCAATTGTTGTGGTGTTGCTCTAAAGAAGGTGTTGCTCTTTGTACCCTCATAATGTGCTATCATTTCCTTCGTGAAAATTGACCACGTAACAAGTTGTTTACGAGAACAAAGCTCTTTATACCATAAAAATTGATCTGGTTCTAAATATGAAGATGCAATGCATACCTTTTGTAACAGTGGTACACCATG…	1330	C	T
isotig01737	CCAATTGTTGTGGTGTAACCCTTGTAGGTTGTGGAAGGCTAGGAGAAACAACACTTCCATCTTTATAGTTGTGAGGGGTAGACTTCCTTGTTGCCATAATTTTACTTTCCACTATGTAACAAAGCCCTTTTACTCTAACTTGTGAGGGGTAGACTTCCTTGTTGCCATAATTTTACTTTCCACTATGTAACAAAGCCCTTTTACTCTTTCCAATTGTTGTGGTGTTGCTCTAAAGAAGGTGTTGCTCTTTGTACCCTCATAATGTGCTATCATTTCCTTCGTGAAAATTGACCACGTAACAAGTTGTTTACGAGAACAAAGCTCTTTATACCATAAAAATTGATCTGGTTCTAAATATGAAGATGCAATGCATACCTTTTGTAACAGTGGTACACCATG…	1338	T	A
isotig01737	CCAATTGTTGTGGTGTAACCCTTGTAGGTTGTGGAAGGCTAGGAGAAACAACACTTCCATCTTTATAGTTGTGAGGGGTAGACTTCCTTGTTGCCATAATTTTACTTTCCACTATGTAACAAAGCCCTTTTACTCTAACTTGTGAGGGGTAGACTTCCTTGTTGCCATAATTTTACTTTCCACTATGTAACAAAGCCCTTTTACTCTTTCCAATTGTTGTGGTGTTGCTCTAAAGAAGGTGTTGCTCTTTGTACCCTCATAATGTGCTATCATTTCCTTCGTGAAAATTGACCACGTAACAAGTTGTTTACGAGAACAAAGCTCTTTATACCATAAAAATTGATCTGGTTCTAAATATGAAGATGCAATGCATACCTTTTGTAACAGTGGTACACCATG…	1931	G	A
isotig01737	CCAATTGTTGTGGTGTAACCCTTGTAGGTTGTGGAAGGCTAGGAGAAACAACACTTCCATCTTTATAGTTGTGAGGGGTAGACTTCCTTGTTGCCATAATTTTACTTTCCACTATGTAACAAAGCCCTTTTACTCTAACTTGTGAGGGGTAGACTTCCTTGTTGCCATAATTTTACTTTCCACTATGTAACAAAGCCCTTTTACTCTTTCCAATTGTTGTGGTGTTGCTCTAAAGAAGGTGTTGCTCTTTGTACCCTCATAATGTGCTATCATTTCCTTCGTGAAAATTGACCACGTAACAAGTTGTTTACGAGAACAAAGCTCTTTATACCATAAAAATTGATCTGGTTCTAAATATGAAGATGCAATGCATACCTTTTGTAACAGTGGTACACCATG…	2195	A	G
isotig01737	CCAATTGTTGTGGTGTAACCCTTGTAGGTTGTGGAAGGCTAGGAGAAACAACACTTCCATCTTTATAGTTGTGAGGGGTAGACTTCCTTGTTGCCATAATTTTACTTTCCACTATGTAACAAAGCCCTTTTACTCTAACTTGTGAGGGGTAGACTTCCTTGTTGCCATAATTTTACTTTCCACTATGTAACAAAGCCCTTTTACTCTTTCCAATTGTTGTGGTGTTGCTCTAAAGAAGGTGTTGCTCTTTGTACCCTCATAATGTGCTATCATTTCCTTCGTGAAAATTGACCACGTAACAAGTTGTTTACGAGAACAAAGCTCTTTATACCATAAAAATTGATCTGGTTCTAAATATGAAGATGCAATGCATACCTTTTGTAACAGTGGTACACCATG…	2213	G	A
isotig01737	CCAATTGTTGTGGTGTAACCCTTGTAGGTTGTGGAAGGCTAGGAGAAACAACACTTCCATCTTTATAGTTGTGAGGGGTAGACTTCCTTGTTGCCATAATTTTACTTTCCACTATGTAACAAAGCCCTTTTACTCTAACTTGTGAGGGGTAGACTTCCTTGTTGCCATAATTTTACTTTCCACTATGTAACAAAGCCCTTTTACTCTTTCCAATTGTTGTGGTGTTGCTCTAAAGAAGGTGTTGCTCTTTGTACCCTCATAATGTGCTATCATTTCCTTCGTGAAAATTGACCACGTAACAAGTTGTTTACGAGAACAAAGCTCTTTATACCATAAAAATTGATCTGGTTCTAAATATGAAGATGCAATGCATACCTTTTGTAACAGTGGTACACCATG…	2216	A	T
isotig01737	CCAATTGTTGTGGTGTAACCCTTGTAGGTTGTGGAAGGCTAGGAGAAACAACACTTCCATCTTTATAGTTGTGAGGGGTAGACTTCCTTGTTGCCATAATTTTACTTTCCACTATGTAACAAAGCCCTTTTACTCTAACTTGTGAGGGGTAGACTTCCTTGTTGCCATAATTTTACTTTCCACTATGTAACAAAGCCCTTTTACTCTTTCCAATTGTTGTGGTGTTGCTCTAAAGAAGGTGTTGCTCTTTGTACCCTCATAATGTGCTATCATTTCCTTCGTGAAAATTGACCACGTAACAAGTTGTTTACGAGAACAAAGCTCTTTATACCATAAAAATTGATCTGGTTCTAAATATGAAGATGCAATGCATACCTTTTGTAACAGTGGTACACCATG…	2228	C	T
isotig01737	CCAATTGTTGTGGTGTAACCCTTGTAGGTTGTGGAAGGCTAGGAGAAACAACACTTCCATCTTTATAGTTGTGAGGGGTAGACTTCCTTGTTGCCATAATTTTACTTTCCACTATGTAACAAAGCCCTTTTACTCTAACTTGTGAGGGGTAGACTTCCTTGTTGCCATAATTTTACTTTCCACTATGTAACAAAGCCCTTTTACTCTTTCCAATTGTTGTGGTGTTGCTCTAAAGAAGGTGTTGCTCTTTGTACCCTCATAATGTGCTATCATTTCCTTCGTGAAAATTGACCACGTAACAAGTTGTTTACGAGAACAAAGCTCTTTATACCATAAAAATTGATCTGGTTCTAAATATGAAGATGCAATGCATACCTTTTGTAACAGTGGTACACCATG…	2233	C	G
isotig01737	CCAATTGTTGTGGTGTAACCCTTGTAGGTTGTGGAAGGCTAGGAGAAACAACACTTCCATCTTTATAGTTGTGAGGGGTAGACTTCCTTGTTGCCATAATTTTACTTTCCACTATGTAACAAAGCCCTTTTACTCTAACTTGTGAGGGGTAGACTTCCTTGTTGCCATAATTTTACTTTCCACTATGTAACAAAGCCCTTTTACTCTTTCCAATTGTTGTGGTGTTGCTCTAAAGAAGGTGTTGCTCTTTGTACCCTCATAATGTGCTATCATTTCCTTCGTGAAAATTGACCACGTAACAAGTTGTTTACGAGAACAAAGCTCTTTATACCATAAAAATTGATCTGGTTCTAAATATGAAGATGCAATGCATACCTTTTGTAACAGTGGTACACCATG…	2264	G	A
isotig01769	GGACCTGCACTCCCATATCTGGTTGCCCACCGTATGAATTCTTTCGGTCTCAAAGCTCGAGTCTTTTAATATTGGATGCCCATGACCAGAAATTGGCTGCGTTTAAACAAGGAACCGGGCAGGCATTAAATTCCCATCTTCATGCTCTTGCTATTATTTTTCAGGTCCGTTTCCTGACTCCCAACTTTAGCCTTCTTGAGAAGTCACAGAGCTACCTAATCTCTTTTAATTGCCGCCCTGCCCTTTCTACCCACCTGGTCGAGGATTTTCAAGAGAGGAAAAGGAAGGTCCAGTTCGCCTGCCACAGTTTCTTCTCGAAGGTGAAGAGAATGTCAGGACGACCTGCAATGGAGTTGTTGCGCTCCCATTTATCGAGAGTCAGGATTCCAGAGCCGTCTA…	32	G	A
isotig01769	GGACCTGCACTCCCATATCTGGTTGCCCACCGTATGAATTCTTTCGGTCTCAAAGCTCGAGTCTTTTAATATTGGATGCCCATGACCAGAAATTGGCTGCGTTTAAACAAGGAACCGGGCAGGCATTAAATTCCCATCTTCATGCTCTTGCTATTATTTTTCAGGTCCGTTTCCTGACTCCCAACTTTAGCCTTCTTGAGAAGTCACAGAGCTACCTAATCTCTTTTAATTGCCGCCCTGCCCTTTCTACCCACCTGGTCGAGGATTTTCAAGAGAGGAAAAGGAAGGTCCAGTTCGCCTGCCACAGTTTCTTCTCGAAGGTGAAGAGAATGTCAGGACGACCTGCAATGGAGTTGTTGCGCTCCCATTTATCGAGAGTCAGGATTCCAGAGCCGTCTA…	33	T	C
isotig01769	GGACCTGCACTCCCATATCTGGTTGCCCACCGTATGAATTCTTTCGGTCTCAAAGCTCGAGTCTTTTAATATTGGATGCCCATGACCAGAAATTGGCTGCGTTTAAACAAGGAACCGGGCAGGCATTAAATTCCCATCTTCATGCTCTTGCTATTATTTTTCAGGTCCGTTTCCTGACTCCCAACTTTAGCCTTCTTGAGAAGTCACAGAGCTACCTAATCTCTTTTAATTGCCGCCCTGCCCTTTCTACCCACCTGGTCGAGGATTTTCAAGAGAGGAAAAGGAAGGTCCAGTTCGCCTGCCACAGTTTCTTCTCGAAGGTGAAGAGAATGTCAGGACGACCTGCAATGGAGTTGTTGCGCTCCCATTTATCGAGAGTCAGGATTCCAGAGCCGTCTA…	102	T	G
isotig01769	GGACCTGCACTCCCATATCTGGTTGCCCACCGTATGAATTCTTTCGGTCTCAAAGCTCGAGTCTTTTAATATTGGATGCCCATGACCAGAAATTGGCTGCGTTTAAACAAGGAACCGGGCAGGCATTAAATTCCCATCTTCATGCTCTTGCTATTATTTTTCAGGTCCGTTTCCTGACTCCCAACTTTAGCCTTCTTGAGAAGTCACAGAGCTACCTAATCTCTTTTAATTGCCGCCCTGCCCTTTCTACCCACCTGGTCGAGGATTTTCAAGAGAGGAAAAGGAAGGTCCAGTTCGCCTGCCACAGTTTCTTCTCGAAGGTGAAGAGAATGTCAGGACGACCTGCAATGGAGTTGTTGCGCTCCCATTTATCGAGAGTCAGGATTCCAGAGCCGTCTA…	104	T	A
isotig01769	GGACCTGCACTCCCATATCTGGTTGCCCACCGTATGAATTCTTTCGGTCTCAAAGCTCGAGTCTTTTAATATTGGATGCCCATGACCAGAAATTGGCTGCGTTTAAACAAGGAACCGGGCAGGCATTAAATTCCCATCTTCATGCTCTTGCTATTATTTTTCAGGTCCGTTTCCTGACTCCCAACTTTAGCCTTCTTGAGAAGTCACAGAGCTACCTAATCTCTTTTAATTGCCGCCCTGCCCTTTCTACCCACCTGGTCGAGGATTTTCAAGAGAGGAAAAGGAAGGTCCAGTTCGCCTGCCACAGTTTCTTCTCGAAGGTGAAGAGAATGTCAGGACGACCTGCAATGGAGTTGTTGCGCTCCCATTTATCGAGAGTCAGGATTCCAGAGCCGTCTA…	120	C	T
isotig01769	GGACCTGCACTCCCATATCTGGTTGCCCACCGTATGAATTCTTTCGGTCTCAAAGCTCGAGTCTTTTAATATTGGATGCCCATGACCAGAAATTGGCTGCGTTTAAACAAGGAACCGGGCAGGCATTAAATTCCCATCTTCATGCTCTTGCTATTATTTTTCAGGTCCGTTTCCTGACTCCCAACTTTAGCCTTCTTGAGAAGTCACAGAGCTACCTAATCTCTTTTAATTGCCGCCCTGCCCTTTCTACCCACCTGGTCGAGGATTTTCAAGAGAGGAAAAGGAAGGTCCAGTTCGCCTGCCACAGTTTCTTCTCGAAGGTGAAGAGAATGTCAGGACGACCTGCAATGGAGTTGTTGCGCTCCCATTTATCGAGAGTCAGGATTCCAGAGCCGTCTA…	189	A	G
isotig01769	GGACCTGCACTCCCATATCTGGTTGCCCACCGTATGAATTCTTTCGGTCTCAAAGCTCGAGTCTTTTAATATTGGATGCCCATGACCAGAAATTGGCTGCGTTTAAACAAGGAACCGGGCAGGCATTAAATTCCCATCTTCATGCTCTTGCTATTATTTTTCAGGTCCGTTTCCTGACTCCCAACTTTAGCCTTCTTGAGAAGTCACAGAGCTACCTAATCTCTTTTAATTGCCGCCCTGCCCTTTCTACCCACCTGGTCGAGGATTTTCAAGAGAGGAAAAGGAAGGTCCAGTTCGCCTGCCACAGTTTCTTCTCGAAGGTGAAGAGAATGTCAGGACGACCTGCAATGGAGTTGTTGCGCTCCCATTTATCGAGAGTCAGGATTCCAGAGCCGTCTA…	428	G	A
isotig01769	GGACCTGCACTCCCATATCTGGTTGCCCACCGTATGAATTCTTTCGGTCTCAAAGCTCGAGTCTTTTAATATTGGATGCCCATGACCAGAAATTGGCTGCGTTTAAACAAGGAACCGGGCAGGCATTAAATTCCCATCTTCATGCTCTTGCTATTATTTTTCAGGTCCGTTTCCTGACTCCCAACTTTAGCCTTCTTGAGAAGTCACAGAGCTACCTAATCTCTTTTAATTGCCGCCCTGCCCTTTCTACCCACCTGGTCGAGGATTTTCAAGAGAGGAAAAGGAAGGTCCAGTTCGCCTGCCACAGTTTCTTCTCGAAGGTGAAGAGAATGTCAGGACGACCTGCAATGGAGTTGTTGCGCTCCCATTTATCGAGAGTCAGGATTCCAGAGCCGTCTA…	1139	T	C
isotig01769	GGACCTGCACTCCCATATCTGGTTGCCCACCGTATGAATTCTTTCGGTCTCAAAGCTCGAGTCTTTTAATATTGGATGCCCATGACCAGAAATTGGCTGCGTTTAAACAAGGAACCGGGCAGGCATTAAATTCCCATCTTCATGCTCTTGCTATTATTTTTCAGGTCCGTTTCCTGACTCCCAACTTTAGCCTTCTTGAGAAGTCACAGAGCTACCTAATCTCTTTTAATTGCCGCCCTGCCCTTTCTACCCACCTGGTCGAGGATTTTCAAGAGAGGAAAAGGAAGGTCCAGTTCGCCTGCCACAGTTTCTTCTCGAAGGTGAAGAGAATGTCAGGACGACCTGCAATGGAGTTGTTGCGCTCCCATTTATCGAGAGTCAGGATTCCAGAGCCGTCTA…	1229	A	G
isotig01769	GGACCTGCACTCCCATATCTGGTTGCCCACCGTATGAATTCTTTCGGTCTCAAAGCTCGAGTCTTTTAATATTGGATGCCCATGACCAGAAATTGGCTGCGTTTAAACAAGGAACCGGGCAGGCATTAAATTCCCATCTTCATGCTCTTGCTATTATTTTTCAGGTCCGTTTCCTGACTCCCAACTTTAGCCTTCTTGAGAAGTCACAGAGCTACCTAATCTCTTTTAATTGCCGCCCTGCCCTTTCTACCCACCTGGTCGAGGATTTTCAAGAGAGGAAAAGGAAGGTCCAGTTCGCCTGCCACAGTTTCTTCTCGAAGGTGAAGAGAATGTCAGGACGACCTGCAATGGAGTTGTTGCGCTCCCATTTATCGAGAGTCAGGATTCCAGAGCCGTCTA…	1851	G	A
isotig01769	GGACCTGCACTCCCATATCTGGTTGCCCACCGTATGAATTCTTTCGGTCTCAAAGCTCGAGTCTTTTAATATTGGATGCCCATGACCAGAAATTGGCTGCGTTTAAACAAGGAACCGGGCAGGCATTAAATTCCCATCTTCATGCTCTTGCTATTATTTTTCAGGTCCGTTTCCTGACTCCCAACTTTAGCCTTCTTGAGAAGTCACAGAGCTACCTAATCTCTTTTAATTGCCGCCCTGCCCTTTCTACCCACCTGGTCGAGGATTTTCAAGAGAGGAAAAGGAAGGTCCAGTTCGCCTGCCACAGTTTCTTCTCGAAGGTGAAGAGAATGTCAGGACGACCTGCAATGGAGTTGTTGCGCTCCCATTTATCGAGAGTCAGGATTCCAGAGCCGTCTA…	2567	A	G
isotig01791	GGTTTTAGGTTTAGGGTTTGTGAGAAGGCATTATATTTAAACTTTATCAGTTTTCGTCAAATCTTTTAGCTCTCTGTATTGTTGTTTAGGACAGAGCCAAGCGGACCAAGGGGGAGCTGTTGCAGCCATGGTCCACGTTAACTTCTATCGCAACTATGGAAAGACTTTTAAGAAACCTCGCCGTCCTTATGAGAAGGAACGGCTGGATGCTGAGCTGAAGTTGGTTGGAGAGTATGGACTCCGCAACAAGAGAGAACTTTGGAGGGTTCAGTATACACTGAGTCGCATTCGAAATGCAGCAAGAATGCTTCTTACTCTTGATGAGAAGAATCCACGAAGGATTTTTGAGGGTGAGGCCTTGTTGCGTCGGATGAATAGGTATGGACTTCTTGATGAGAC…	64	T	C
isotig01791	GGTTTTAGGTTTAGGGTTTGTGAGAAGGCATTATATTTAAACTTTATCAGTTTTCGTCAAATCTTTTAGCTCTCTGTATTGTTGTTTAGGACAGAGCCAAGCGGACCAAGGGGGAGCTGTTGCAGCCATGGTCCACGTTAACTTCTATCGCAACTATGGAAAGACTTTTAAGAAACCTCGCCGTCCTTATGAGAAGGAACGGCTGGATGCTGAGCTGAAGTTGGTTGGAGAGTATGGACTCCGCAACAAGAGAGAACTTTGGAGGGTTCAGTATACACTGAGTCGCATTCGAAATGCAGCAAGAATGCTTCTTACTCTTGATGAGAAGAATCCACGAAGGATTTTTGAGGGTGAGGCCTTGTTGCGTCGGATGAATAGGTATGGACTTCTTGATGAGAC…	400	C	T
isotig01791	GGTTTTAGGTTTAGGGTTTGTGAGAAGGCATTATATTTAAACTTTATCAGTTTTCGTCAAATCTTTTAGCTCTCTGTATTGTTGTTTAGGACAGAGCCAAGCGGACCAAGGGGGAGCTGTTGCAGCCATGGTCCACGTTAACTTCTATCGCAACTATGGAAAGACTTTTAAGAAACCTCGCCGTCCTTATGAGAAGGAACGGCTGGATGCTGAGCTGAAGTTGGTTGGAGAGTATGGACTCCGCAACAAGAGAGAACTTTGGAGGGTTCAGTATACACTGAGTCGCATTCGAAATGCAGCAAGAATGCTTCTTACTCTTGATGAGAAGAATCCACGAAGGATTTTTGAGGGTGAGGCCTTGTTGCGTCGGATGAATAGGTATGGACTTCTTGATGAGAC…	439	G	A
isotig01791	GGTTTTAGGTTTAGGGTTTGTGAGAAGGCATTATATTTAAACTTTATCAGTTTTCGTCAAATCTTTTAGCTCTCTGTATTGTTGTTTAGGACAGAGCCAAGCGGACCAAGGGGGAGCTGTTGCAGCCATGGTCCACGTTAACTTCTATCGCAACTATGGAAAGACTTTTAAGAAACCTCGCCGTCCTTATGAGAAGGAACGGCTGGATGCTGAGCTGAAGTTGGTTGGAGAGTATGGACTCCGCAACAAGAGAGAACTTTGGAGGGTTCAGTATACACTGAGTCGCATTCGAAATGCAGCAAGAATGCTTCTTACTCTTGATGAGAAGAATCCACGAAGGATTTTTGAGGGTGAGGCCTTGTTGCGTCGGATGAATAGGTATGGACTTCTTGATGAGAC…	508	T	A
isotig01791	GGTTTTAGGTTTAGGGTTTGTGAGAAGGCATTATATTTAAACTTTATCAGTTTTCGTCAAATCTTTTAGCTCTCTGTATTGTTGTTTAGGACAGAGCCAAGCGGACCAAGGGGGAGCTGTTGCAGCCATGGTCCACGTTAACTTCTATCGCAACTATGGAAAGACTTTTAAGAAACCTCGCCGTCCTTATGAGAAGGAACGGCTGGATGCTGAGCTGAAGTTGGTTGGAGAGTATGGACTCCGCAACAAGAGAGAACTTTGGAGGGTTCAGTATACACTGAGTCGCATTCGAAATGCAGCAAGAATGCTTCTTACTCTTGATGAGAAGAATCCACGAAGGATTTTTGAGGGTGAGGCCTTGTTGCGTCGGATGAATAGGTATGGACTTCTTGATGAGAC…	529	T	C
isotig01791	GGTTTTAGGTTTAGGGTTTGTGAGAAGGCATTATATTTAAACTTTATCAGTTTTCGTCAAATCTTTTAGCTCTCTGTATTGTTGTTTAGGACAGAGCCAAGCGGACCAAGGGGGAGCTGTTGCAGCCATGGTCCACGTTAACTTCTATCGCAACTATGGAAAGACTTTTAAGAAACCTCGCCGTCCTTATGAGAAGGAACGGCTGGATGCTGAGCTGAAGTTGGTTGGAGAGTATGGACTCCGCAACAAGAGAGAACTTTGGAGGGTTCAGTATACACTGAGTCGCATTCGAAATGCAGCAAGAATGCTTCTTACTCTTGATGAGAAGAATCCACGAAGGATTTTTGAGGGTGAGGCCTTGTTGCGTCGGATGAATAGGTATGGACTTCTTGATGAGAC…	889	G	A
isotig01808	AATTTTCCCACTTTGAATTTAATGAGGCTCTGTATTACATAAAGTCCTCGGATTACGATCTGTTTGCTATTCATACCCTTTTTACCAGGCTGCATCAGAATTAGAGGCATCACTTGTTTGTTTCAAGGATCCACCCTTTCCATGGGGATCGGCACTTACCTTTCTCATGATTTTTGTTGGCTTTTTCTACGCCTTCTTGAGAAGAGATAAACTTTTCCGTAGTAAAAGAAAGCAATTCTGAAGCCCCAAAAAAGACAAGTTTCAGTCTATTTGATTTTATCATGGAAGCTCTGTTTATCCTTCATCCGGATTTTAATCCGTGTATGCTCTCTGAATGGCAATGGAATATATGATTTTTTTTAGGGTCAAAGAAATGGTTTCCATTCATGGAATAGCATT…	501	G	A
isotig01808	AATTTTCCCACTTTGAATTTAATGAGGCTCTGTATTACATAAAGTCCTCGGATTACGATCTGTTTGCTATTCATACCCTTTTTACCAGGCTGCATCAGAATTAGAGGCATCACTTGTTTGTTTCAAGGATCCACCCTTTCCATGGGGATCGGCACTTACCTTTCTCATGATTTTTGTTGGCTTTTTCTACGCCTTCTTGAGAAGAGATAAACTTTTCCGTAGTAAAAGAAAGCAATTCTGAAGCCCCAAAAAAGACAAGTTTCAGTCTATTTGATTTTATCATGGAAGCTCTGTTTATCCTTCATCCGGATTTTAATCCGTGTATGCTCTCTGAATGGCAATGGAATATATGATTTTTTTTAGGGTCAAAGAAATGGTTTCCATTCATGGAATAGCATT…	513	A	G
isotig01808	AATTTTCCCACTTTGAATTTAATGAGGCTCTGTATTACATAAAGTCCTCGGATTACGATCTGTTTGCTATTCATACCCTTTTTACCAGGCTGCATCAGAATTAGAGGCATCACTTGTTTGTTTCAAGGATCCACCCTTTCCATGGGGATCGGCACTTACCTTTCTCATGATTTTTGTTGGCTTTTTCTACGCCTTCTTGAGAAGAGATAAACTTTTCCGTAGTAAAAGAAAGCAATTCTGAAGCCCCAAAAAAGACAAGTTTCAGTCTATTTGATTTTATCATGGAAGCTCTGTTTATCCTTCATCCGGATTTTAATCCGTGTATGCTCTCTGAATGGCAATGGAATATATGATTTTTTTTAGGGTCAAAGAAATGGTTTCCATTCATGGAATAGCATT…	852	T	C
isotig01808	AATTTTCCCACTTTGAATTTAATGAGGCTCTGTATTACATAAAGTCCTCGGATTACGATCTGTTTGCTATTCATACCCTTTTTACCAGGCTGCATCAGAATTAGAGGCATCACTTGTTTGTTTCAAGGATCCACCCTTTCCATGGGGATCGGCACTTACCTTTCTCATGATTTTTGTTGGCTTTTTCTACGCCTTCTTGAGAAGAGATAAACTTTTCCGTAGTAAAAGAAAGCAATTCTGAAGCCCCAAAAAAGACAAGTTTCAGTCTATTTGATTTTATCATGGAAGCTCTGTTTATCCTTCATCCGGATTTTAATCCGTGTATGCTCTCTGAATGGCAATGGAATATATGATTTTTTTTAGGGTCAAAGAAATGGTTTCCATTCATGGAATAGCATT…	920	C	G
isotig01808	AATTTTCCCACTTTGAATTTAATGAGGCTCTGTATTACATAAAGTCCTCGGATTACGATCTGTTTGCTATTCATACCCTTTTTACCAGGCTGCATCAGAATTAGAGGCATCACTTGTTTGTTTCAAGGATCCACCCTTTCCATGGGGATCGGCACTTACCTTTCTCATGATTTTTGTTGGCTTTTTCTACGCCTTCTTGAGAAGAGATAAACTTTTCCGTAGTAAAAGAAAGCAATTCTGAAGCCCCAAAAAAGACAAGTTTCAGTCTATTTGATTTTATCATGGAAGCTCTGTTTATCCTTCATCCGGATTTTAATCCGTGTATGCTCTCTGAATGGCAATGGAATATATGATTTTTTTTAGGGTCAAAGAAATGGTTTCCATTCATGGAATAGCATT…	921	A	G
isotig01808	AATTTTCCCACTTTGAATTTAATGAGGCTCTGTATTACATAAAGTCCTCGGATTACGATCTGTTTGCTATTCATACCCTTTTTACCAGGCTGCATCAGAATTAGAGGCATCACTTGTTTGTTTCAAGGATCCACCCTTTCCATGGGGATCGGCACTTACCTTTCTCATGATTTTTGTTGGCTTTTTCTACGCCTTCTTGAGAAGAGATAAACTTTTCCGTAGTAAAAGAAAGCAATTCTGAAGCCCCAAAAAAGACAAGTTTCAGTCTATTTGATTTTATCATGGAAGCTCTGTTTATCCTTCATCCGGATTTTAATCCGTGTATGCTCTCTGAATGGCAATGGAATATATGATTTTTTTTAGGGTCAAAGAAATGGTTTCCATTCATGGAATAGCATT…	965	C	T
isotig01808	AATTTTCCCACTTTGAATTTAATGAGGCTCTGTATTACATAAAGTCCTCGGATTACGATCTGTTTGCTATTCATACCCTTTTTACCAGGCTGCATCAGAATTAGAGGCATCACTTGTTTGTTTCAAGGATCCACCCTTTCCATGGGGATCGGCACTTACCTTTCTCATGATTTTTGTTGGCTTTTTCTACGCCTTCTTGAGAAGAGATAAACTTTTCCGTAGTAAAAGAAAGCAATTCTGAAGCCCCAAAAAAGACAAGTTTCAGTCTATTTGATTTTATCATGGAAGCTCTGTTTATCCTTCATCCGGATTTTAATCCGTGTATGCTCTCTGAATGGCAATGGAATATATGATTTTTTTTAGGGTCAAAGAAATGGTTTCCATTCATGGAATAGCATT…	972	G	A
isotig01808	AATTTTCCCACTTTGAATTTAATGAGGCTCTGTATTACATAAAGTCCTCGGATTACGATCTGTTTGCTATTCATACCCTTTTTACCAGGCTGCATCAGAATTAGAGGCATCACTTGTTTGTTTCAAGGATCCACCCTTTCCATGGGGATCGGCACTTACCTTTCTCATGATTTTTGTTGGCTTTTTCTACGCCTTCTTGAGAAGAGATAAACTTTTCCGTAGTAAAAGAAAGCAATTCTGAAGCCCCAAAAAAGACAAGTTTCAGTCTATTTGATTTTATCATGGAAGCTCTGTTTATCCTTCATCCGGATTTTAATCCGTGTATGCTCTCTGAATGGCAATGGAATATATGATTTTTTTTAGGGTCAAAGAAATGGTTTCCATTCATGGAATAGCATT…	1041	A	T
isotig01808	AATTTTCCCACTTTGAATTTAATGAGGCTCTGTATTACATAAAGTCCTCGGATTACGATCTGTTTGCTATTCATACCCTTTTTACCAGGCTGCATCAGAATTAGAGGCATCACTTGTTTGTTTCAAGGATCCACCCTTTCCATGGGGATCGGCACTTACCTTTCTCATGATTTTTGTTGGCTTTTTCTACGCCTTCTTGAGAAGAGATAAACTTTTCCGTAGTAAAAGAAAGCAATTCTGAAGCCCCAAAAAAGACAAGTTTCAGTCTATTTGATTTTATCATGGAAGCTCTGTTTATCCTTCATCCGGATTTTAATCCGTGTATGCTCTCTGAATGGCAATGGAATATATGATTTTTTTTAGGGTCAAAGAAATGGTTTCCATTCATGGAATAGCATT…	1098	C	T
isotig01808	AATTTTCCCACTTTGAATTTAATGAGGCTCTGTATTACATAAAGTCCTCGGATTACGATCTGTTTGCTATTCATACCCTTTTTACCAGGCTGCATCAGAATTAGAGGCATCACTTGTTTGTTTCAAGGATCCACCCTTTCCATGGGGATCGGCACTTACCTTTCTCATGATTTTTGTTGGCTTTTTCTACGCCTTCTTGAGAAGAGATAAACTTTTCCGTAGTAAAAGAAAGCAATTCTGAAGCCCCAAAAAAGACAAGTTTCAGTCTATTTGATTTTATCATGGAAGCTCTGTTTATCCTTCATCCGGATTTTAATCCGTGTATGCTCTCTGAATGGCAATGGAATATATGATTTTTTTTAGGGTCAAAGAAATGGTTTCCATTCATGGAATAGCATT…	1191	A	G
isotig01808	AATTTTCCCACTTTGAATTTAATGAGGCTCTGTATTACATAAAGTCCTCGGATTACGATCTGTTTGCTATTCATACCCTTTTTACCAGGCTGCATCAGAATTAGAGGCATCACTTGTTTGTTTCAAGGATCCACCCTTTCCATGGGGATCGGCACTTACCTTTCTCATGATTTTTGTTGGCTTTTTCTACGCCTTCTTGAGAAGAGATAAACTTTTCCGTAGTAAAAGAAAGCAATTCTGAAGCCCCAAAAAAGACAAGTTTCAGTCTATTTGATTTTATCATGGAAGCTCTGTTTATCCTTCATCCGGATTTTAATCCGTGTATGCTCTCTGAATGGCAATGGAATATATGATTTTTTTTAGGGTCAAAGAAATGGTTTCCATTCATGGAATAGCATT…	1285	A	T
isotig01808	AATTTTCCCACTTTGAATTTAATGAGGCTCTGTATTACATAAAGTCCTCGGATTACGATCTGTTTGCTATTCATACCCTTTTTACCAGGCTGCATCAGAATTAGAGGCATCACTTGTTTGTTTCAAGGATCCACCCTTTCCATGGGGATCGGCACTTACCTTTCTCATGATTTTTGTTGGCTTTTTCTACGCCTTCTTGAGAAGAGATAAACTTTTCCGTAGTAAAAGAAAGCAATTCTGAAGCCCCAAAAAAGACAAGTTTCAGTCTATTTGATTTTATCATGGAAGCTCTGTTTATCCTTCATCCGGATTTTAATCCGTGTATGCTCTCTGAATGGCAATGGAATATATGATTTTTTTTAGGGTCAAAGAAATGGTTTCCATTCATGGAATAGCATT…	1329	C	G
isotig01808	AATTTTCCCACTTTGAATTTAATGAGGCTCTGTATTACATAAAGTCCTCGGATTACGATCTGTTTGCTATTCATACCCTTTTTACCAGGCTGCATCAGAATTAGAGGCATCACTTGTTTGTTTCAAGGATCCACCCTTTCCATGGGGATCGGCACTTACCTTTCTCATGATTTTTGTTGGCTTTTTCTACGCCTTCTTGAGAAGAGATAAACTTTTCCGTAGTAAAAGAAAGCAATTCTGAAGCCCCAAAAAAGACAAGTTTCAGTCTATTTGATTTTATCATGGAAGCTCTGTTTATCCTTCATCCGGATTTTAATCCGTGTATGCTCTCTGAATGGCAATGGAATATATGATTTTTTTTAGGGTCAAAGAAATGGTTTCCATTCATGGAATAGCATT…	1333	A	G
isotig01808	AATTTTCCCACTTTGAATTTAATGAGGCTCTGTATTACATAAAGTCCTCGGATTACGATCTGTTTGCTATTCATACCCTTTTTACCAGGCTGCATCAGAATTAGAGGCATCACTTGTTTGTTTCAAGGATCCACCCTTTCCATGGGGATCGGCACTTACCTTTCTCATGATTTTTGTTGGCTTTTTCTACGCCTTCTTGAGAAGAGATAAACTTTTCCGTAGTAAAAGAAAGCAATTCTGAAGCCCCAAAAAAGACAAGTTTCAGTCTATTTGATTTTATCATGGAAGCTCTGTTTATCCTTCATCCGGATTTTAATCCGTGTATGCTCTCTGAATGGCAATGGAATATATGATTTTTTTTAGGGTCAAAGAAATGGTTTCCATTCATGGAATAGCATT…	1359	C	T
isotig01808	AATTTTCCCACTTTGAATTTAATGAGGCTCTGTATTACATAAAGTCCTCGGATTACGATCTGTTTGCTATTCATACCCTTTTTACCAGGCTGCATCAGAATTAGAGGCATCACTTGTTTGTTTCAAGGATCCACCCTTTCCATGGGGATCGGCACTTACCTTTCTCATGATTTTTGTTGGCTTTTTCTACGCCTTCTTGAGAAGAGATAAACTTTTCCGTAGTAAAAGAAAGCAATTCTGAAGCCCCAAAAAAGACAAGTTTCAGTCTATTTGATTTTATCATGGAAGCTCTGTTTATCCTTCATCCGGATTTTAATCCGTGTATGCTCTCTGAATGGCAATGGAATATATGATTTTTTTTAGGGTCAAAGAAATGGTTTCCATTCATGGAATAGCATT…	1364	A	G
isotig01808	AATTTTCCCACTTTGAATTTAATGAGGCTCTGTATTACATAAAGTCCTCGGATTACGATCTGTTTGCTATTCATACCCTTTTTACCAGGCTGCATCAGAATTAGAGGCATCACTTGTTTGTTTCAAGGATCCACCCTTTCCATGGGGATCGGCACTTACCTTTCTCATGATTTTTGTTGGCTTTTTCTACGCCTTCTTGAGAAGAGATAAACTTTTCCGTAGTAAAAGAAAGCAATTCTGAAGCCCCAAAAAAGACAAGTTTCAGTCTATTTGATTTTATCATGGAAGCTCTGTTTATCCTTCATCCGGATTTTAATCCGTGTATGCTCTCTGAATGGCAATGGAATATATGATTTTTTTTAGGGTCAAAGAAATGGTTTCCATTCATGGAATAGCATT…	1368	C	A
isotig01808	AATTTTCCCACTTTGAATTTAATGAGGCTCTGTATTACATAAAGTCCTCGGATTACGATCTGTTTGCTATTCATACCCTTTTTACCAGGCTGCATCAGAATTAGAGGCATCACTTGTTTGTTTCAAGGATCCACCCTTTCCATGGGGATCGGCACTTACCTTTCTCATGATTTTTGTTGGCTTTTTCTACGCCTTCTTGAGAAGAGATAAACTTTTCCGTAGTAAAAGAAAGCAATTCTGAAGCCCCAAAAAAGACAAGTTTCAGTCTATTTGATTTTATCATGGAAGCTCTGTTTATCCTTCATCCGGATTTTAATCCGTGTATGCTCTCTGAATGGCAATGGAATATATGATTTTTTTTAGGGTCAAAGAAATGGTTTCCATTCATGGAATAGCATT…	1378	T	C
isotig01808	AATTTTCCCACTTTGAATTTAATGAGGCTCTGTATTACATAAAGTCCTCGGATTACGATCTGTTTGCTATTCATACCCTTTTTACCAGGCTGCATCAGAATTAGAGGCATCACTTGTTTGTTTCAAGGATCCACCCTTTCCATGGGGATCGGCACTTACCTTTCTCATGATTTTTGTTGGCTTTTTCTACGCCTTCTTGAGAAGAGATAAACTTTTCCGTAGTAAAAGAAAGCAATTCTGAAGCCCCAAAAAAGACAAGTTTCAGTCTATTTGATTTTATCATGGAAGCTCTGTTTATCCTTCATCCGGATTTTAATCCGTGTATGCTCTCTGAATGGCAATGGAATATATGATTTTTTTTAGGGTCAAAGAAATGGTTTCCATTCATGGAATAGCATT…	1392	C	T
isotig01808	AATTTTCCCACTTTGAATTTAATGAGGCTCTGTATTACATAAAGTCCTCGGATTACGATCTGTTTGCTATTCATACCCTTTTTACCAGGCTGCATCAGAATTAGAGGCATCACTTGTTTGTTTCAAGGATCCACCCTTTCCATGGGGATCGGCACTTACCTTTCTCATGATTTTTGTTGGCTTTTTCTACGCCTTCTTGAGAAGAGATAAACTTTTCCGTAGTAAAAGAAAGCAATTCTGAAGCCCCAAAAAAGACAAGTTTCAGTCTATTTGATTTTATCATGGAAGCTCTGTTTATCCTTCATCCGGATTTTAATCCGTGTATGCTCTCTGAATGGCAATGGAATATATGATTTTTTTTAGGGTCAAAGAAATGGTTTCCATTCATGGAATAGCATT…	1396	T	C
isotig01808	AATTTTCCCACTTTGAATTTAATGAGGCTCTGTATTACATAAAGTCCTCGGATTACGATCTGTTTGCTATTCATACCCTTTTTACCAGGCTGCATCAGAATTAGAGGCATCACTTGTTTGTTTCAAGGATCCACCCTTTCCATGGGGATCGGCACTTACCTTTCTCATGATTTTTGTTGGCTTTTTCTACGCCTTCTTGAGAAGAGATAAACTTTTCCGTAGTAAAAGAAAGCAATTCTGAAGCCCCAAAAAAGACAAGTTTCAGTCTATTTGATTTTATCATGGAAGCTCTGTTTATCCTTCATCCGGATTTTAATCCGTGTATGCTCTCTGAATGGCAATGGAATATATGATTTTTTTTAGGGTCAAAGAAATGGTTTCCATTCATGGAATAGCATT…	1417	C	T
isotig01808	AATTTTCCCACTTTGAATTTAATGAGGCTCTGTATTACATAAAGTCCTCGGATTACGATCTGTTTGCTATTCATACCCTTTTTACCAGGCTGCATCAGAATTAGAGGCATCACTTGTTTGTTTCAAGGATCCACCCTTTCCATGGGGATCGGCACTTACCTTTCTCATGATTTTTGTTGGCTTTTTCTACGCCTTCTTGAGAAGAGATAAACTTTTCCGTAGTAAAAGAAAGCAATTCTGAAGCCCCAAAAAAGACAAGTTTCAGTCTATTTGATTTTATCATGGAAGCTCTGTTTATCCTTCATCCGGATTTTAATCCGTGTATGCTCTCTGAATGGCAATGGAATATATGATTTTTTTTAGGGTCAAAGAAATGGTTTCCATTCATGGAATAGCATT…	1492	C	G
isotig01869	GTTGGTGTAAAGCGAAACACGTGGCGCCACTGTGTCCGTTACAACAATAAATCAAATTTTCGAACACTCTGGCTACCTCGCACCGACTCTGTTTTGAAAGCGCGTTCCTTGTGACCATTGTGAGCAGGGCGCGTGTAAAGGCAAAGCGCGTACCATAGCCAAGAGATTCCACATTGACGATAAAAACCACTGAGCTATTCCTTACAATTCATCCACTGCATTGCATTCCTTTTGATATCTCTGCCGATTATCGTTTCATATAATCTGGATCTACTTTGCTGAATTTAATATCTTTAGCATTTTCAAGTTCGAATCAGTATGGCCGAGCAAGCGCCGGAGCACCAGGATCGCGGCCTGTTCGGGTTTTTTGGCAAGAAGGAAGAGGACGGAAAGCATGAA…	2180	C	G
isotig01869	GTTGGTGTAAAGCGAAACACGTGGCGCCACTGTGTCCGTTACAACAATAAATCAAATTTTCGAACACTCTGGCTACCTCGCACCGACTCTGTTTTGAAAGCGCGTTCCTTGTGACCATTGTGAGCAGGGCGCGTGTAAAGGCAAAGCGCGTACCATAGCCAAGAGATTCCACATTGACGATAAAAACCACTGAGCTATTCCTTACAATTCATCCACTGCATTGCATTCCTTTTGATATCTCTGCCGATTATCGTTTCATATAATCTGGATCTACTTTGCTGAATTTAATATCTTTAGCATTTTCAAGTTCGAATCAGTATGGCCGAGCAAGCGCCGGAGCACCAGGATCGCGGCCTGTTCGGGTTTTTTGGCAAGAAGGAAGAGGACGGAAAGCATGAA…	2181	A	T
isotig01869	GTTGGTGTAAAGCGAAACACGTGGCGCCACTGTGTCCGTTACAACAATAAATCAAATTTTCGAACACTCTGGCTACCTCGCACCGACTCTGTTTTGAAAGCGCGTTCCTTGTGACCATTGTGAGCAGGGCGCGTGTAAAGGCAAAGCGCGTACCATAGCCAAGAGATTCCACATTGACGATAAAAACCACTGAGCTATTCCTTACAATTCATCCACTGCATTGCATTCCTTTTGATATCTCTGCCGATTATCGTTTCATATAATCTGGATCTACTTTGCTGAATTTAATATCTTTAGCATTTTCAAGTTCGAATCAGTATGGCCGAGCAAGCGCCGGAGCACCAGGATCGCGGCCTGTTCGGGTTTTTTGGCAAGAAGGAAGAGGACGGAAAGCATGAA…	2443	A	T
isotig01913	CGAATGTTAGTGGGGCAAAAATGACAATTATTAATTTGTTGCATCCTTAGGTCTTTTTATTAAAGTTGCACTGCATAAATTTCTCTGTGCTCACCCTTCCTCTCGATTTTGTTTCATGATCAGGAGAAGTGGAGGGGAGGCAGAGACAGTGCAGTAGCAACATTGGCCACATGGTGTTGTGTAGGAAGGGGAGGAGGTGGCAGAGGAAGTAATAATGGGCAGCACAGAGGAGGAGGAGGAGGCCGCGTCGTCTTCTTCTTGCACGATGGATAAGTTTGAAGGTCTAACACTGAAAGAGGGGGAGAGGATCGTGGCGCCAACAAGGAGGCCCGATGGCACCCTTCGCAAACCCATTCGCATAAGAGCGGGCTATGTCCCTCAGGAAGAAGTCGCTATTTA…	1705	A	G
isotig01913	CGAATGTTAGTGGGGCAAAAATGACAATTATTAATTTGTTGCATCCTTAGGTCTTTTTATTAAAGTTGCACTGCATAAATTTCTCTGTGCTCACCCTTCCTCTCGATTTTGTTTCATGATCAGGAGAAGTGGAGGGGAGGCAGAGACAGTGCAGTAGCAACATTGGCCACATGGTGTTGTGTAGGAAGGGGAGGAGGTGGCAGAGGAAGTAATAATGGGCAGCACAGAGGAGGAGGAGGAGGCCGCGTCGTCTTCTTCTTGCACGATGGATAAGTTTGAAGGTCTAACACTGAAAGAGGGGGAGAGGATCGTGGCGCCAACAAGGAGGCCCGATGGCACCCTTCGCAAACCCATTCGCATAAGAGCGGGCTATGTCCCTCAGGAAGAAGTCGCTATTTA…	1798	A	G
isotig01913	CGAATGTTAGTGGGGCAAAAATGACAATTATTAATTTGTTGCATCCTTAGGTCTTTTTATTAAAGTTGCACTGCATAAATTTCTCTGTGCTCACCCTTCCTCTCGATTTTGTTTCATGATCAGGAGAAGTGGAGGGGAGGCAGAGACAGTGCAGTAGCAACATTGGCCACATGGTGTTGTGTAGGAAGGGGAGGAGGTGGCAGAGGAAGTAATAATGGGCAGCACAGAGGAGGAGGAGGAGGCCGCGTCGTCTTCTTCTTGCACGATGGATAAGTTTGAAGGTCTAACACTGAAAGAGGGGGAGAGGATCGTGGCGCCAACAAGGAGGCCCGATGGCACCCTTCGCAAACCCATTCGCATAAGAGCGGGCTATGTCCCTCAGGAAGAAGTCGCTATTTA…	2179	A	C
isotig01913	CGAATGTTAGTGGGGCAAAAATGACAATTATTAATTTGTTGCATCCTTAGGTCTTTTTATTAAAGTTGCACTGCATAAATTTCTCTGTGCTCACCCTTCCTCTCGATTTTGTTTCATGATCAGGAGAAGTGGAGGGGAGGCAGAGACAGTGCAGTAGCAACATTGGCCACATGGTGTTGTGTAGGAAGGGGAGGAGGTGGCAGAGGAAGTAATAATGGGCAGCACAGAGGAGGAGGAGGAGGCCGCGTCGTCTTCTTCTTGCACGATGGATAAGTTTGAAGGTCTAACACTGAAAGAGGGGGAGAGGATCGTGGCGCCAACAAGGAGGCCCGATGGCACCCTTCGCAAACCCATTCGCATAAGAGCGGGCTATGTCCCTCAGGAAGAAGTCGCTATTTA…	2248	G	A
isotig01913	CGAATGTTAGTGGGGCAAAAATGACAATTATTAATTTGTTGCATCCTTAGGTCTTTTTATTAAAGTTGCACTGCATAAATTTCTCTGTGCTCACCCTTCCTCTCGATTTTGTTTCATGATCAGGAGAAGTGGAGGGGAGGCAGAGACAGTGCAGTAGCAACATTGGCCACATGGTGTTGTGTAGGAAGGGGAGGAGGTGGCAGAGGAAGTAATAATGGGCAGCACAGAGGAGGAGGAGGAGGCCGCGTCGTCTTCTTCTTGCACGATGGATAAGTTTGAAGGTCTAACACTGAAAGAGGGGGAGAGGATCGTGGCGCCAACAAGGAGGCCCGATGGCACCCTTCGCAAACCCATTCGCATAAGAGCGGGCTATGTCCCTCAGGAAGAAGTCGCTATTTA…	2332	G	C
isotig01962	GACACACATAAGAGTAGGATGACATCCAAGAATTGAGAAGAGATTACCTGAGACATCACATATAATAGTCATATTTCCAGTGACTTCCAAAAGGACCTGTTCCATCCTTAAAATCCACCATAATTAACTGAATGAAAGAGCACACAGTGCACTACCATTATATCAGAAAACAAAATCTGGAGTTGATACTTGTTCTCACTTACAAATCTTTGCACCTCTAACAAGTTGAAGCAATGATAAACAAAGGATGACACTGCACTACCATTTCTTGCTACATATATTTGCATACATGTCGCAACTTGAAAGTCTCGAATACAAAATACAGGAATCTAACTCCTTCCAAAATGAAAGTTCTATTATTTTTCATTGACTACTTGCTGGGTAAACATGCCCACTGTT…	388	A	C
isotig02012	GTCCAACTAATAAAAGACAGGGTTTATTTCTTCTGAAAAAAAAATCTTAAAATTTCTATCCAACTAAGTATTTGCTTCCCATTATTAGATAGTCCATCCTGTGATACTCCGAAGATAGACCTTAAAACCTTCACACAAGCAACTCTCAACAGAGCATATAACAGCAAAGTTTTGATCACTCAGTCCAACAAATTCAACTTATGCTCTCCCACCATTTCATGCTTATAACATGTAAAATCCAAAAACTGCCGGGATTTAACAATTCAACATGAATAACCATAGAAAGCAATTAGCACTCGCATACTCGATAAACACAATCTACATGTAATTAATATTAATACACATATCATATCGTTTTAGGTGAGATCGCTGATCCGATCGTTAACCTTTCACTTGTTT…	99	C	G
isotig02012	GTCCAACTAATAAAAGACAGGGTTTATTTCTTCTGAAAAAAAAATCTTAAAATTTCTATCCAACTAAGTATTTGCTTCCCATTATTAGATAGTCCATCCTGTGATACTCCGAAGATAGACCTTAAAACCTTCACACAAGCAACTCTCAACAGAGCATATAACAGCAAAGTTTTGATCACTCAGTCCAACAAATTCAACTTATGCTCTCCCACCATTTCATGCTTATAACATGTAAAATCCAAAAACTGCCGGGATTTAACAATTCAACATGAATAACCATAGAAAGCAATTAGCACTCGCATACTCGATAAACACAATCTACATGTAATTAATATTAATACACATATCATATCGTTTTAGGTGAGATCGCTGATCCGATCGTTAACCTTTCACTTGTTT…	119	A	G
isotig02012	GTCCAACTAATAAAAGACAGGGTTTATTTCTTCTGAAAAAAAAATCTTAAAATTTCTATCCAACTAAGTATTTGCTTCCCATTATTAGATAGTCCATCCTGTGATACTCCGAAGATAGACCTTAAAACCTTCACACAAGCAACTCTCAACAGAGCATATAACAGCAAAGTTTTGATCACTCAGTCCAACAAATTCAACTTATGCTCTCCCACCATTTCATGCTTATAACATGTAAAATCCAAAAACTGCCGGGATTTAACAATTCAACATGAATAACCATAGAAAGCAATTAGCACTCGCATACTCGATAAACACAATCTACATGTAATTAATATTAATACACATATCATATCGTTTTAGGTGAGATCGCTGATCCGATCGTTAACCTTTCACTTGTTT…	120	C	A
isotig02012	GTCCAACTAATAAAAGACAGGGTTTATTTCTTCTGAAAAAAAAATCTTAAAATTTCTATCCAACTAAGTATTTGCTTCCCATTATTAGATAGTCCATCCTGTGATACTCCGAAGATAGACCTTAAAACCTTCACACAAGCAACTCTCAACAGAGCATATAACAGCAAAGTTTTGATCACTCAGTCCAACAAATTCAACTTATGCTCTCCCACCATTTCATGCTTATAACATGTAAAATCCAAAAACTGCCGGGATTTAACAATTCAACATGAATAACCATAGAAAGCAATTAGCACTCGCATACTCGATAAACACAATCTACATGTAATTAATATTAATACACATATCATATCGTTTTAGGTGAGATCGCTGATCCGATCGTTAACCTTTCACTTGTTT…	296	C	G
isotig02012	GTCCAACTAATAAAAGACAGGGTTTATTTCTTCTGAAAAAAAAATCTTAAAATTTCTATCCAACTAAGTATTTGCTTCCCATTATTAGATAGTCCATCCTGTGATACTCCGAAGATAGACCTTAAAACCTTCACACAAGCAACTCTCAACAGAGCATATAACAGCAAAGTTTTGATCACTCAGTCCAACAAATTCAACTTATGCTCTCCCACCATTTCATGCTTATAACATGTAAAATCCAAAAACTGCCGGGATTTAACAATTCAACATGAATAACCATAGAAAGCAATTAGCACTCGCATACTCGATAAACACAATCTACATGTAATTAATATTAATACACATATCATATCGTTTTAGGTGAGATCGCTGATCCGATCGTTAACCTTTCACTTGTTT…	303	A	G
isotig02012	GTCCAACTAATAAAAGACAGGGTTTATTTCTTCTGAAAAAAAAATCTTAAAATTTCTATCCAACTAAGTATTTGCTTCCCATTATTAGATAGTCCATCCTGTGATACTCCGAAGATAGACCTTAAAACCTTCACACAAGCAACTCTCAACAGAGCATATAACAGCAAAGTTTTGATCACTCAGTCCAACAAATTCAACTTATGCTCTCCCACCATTTCATGCTTATAACATGTAAAATCCAAAAACTGCCGGGATTTAACAATTCAACATGAATAACCATAGAAAGCAATTAGCACTCGCATACTCGATAAACACAATCTACATGTAATTAATATTAATACACATATCATATCGTTTTAGGTGAGATCGCTGATCCGATCGTTAACCTTTCACTTGTTT…	725	G	A
isotig02012	GTCCAACTAATAAAAGACAGGGTTTATTTCTTCTGAAAAAAAAATCTTAAAATTTCTATCCAACTAAGTATTTGCTTCCCATTATTAGATAGTCCATCCTGTGATACTCCGAAGATAGACCTTAAAACCTTCACACAAGCAACTCTCAACAGAGCATATAACAGCAAAGTTTTGATCACTCAGTCCAACAAATTCAACTTATGCTCTCCCACCATTTCATGCTTATAACATGTAAAATCCAAAAACTGCCGGGATTTAACAATTCAACATGAATAACCATAGAAAGCAATTAGCACTCGCATACTCGATAAACACAATCTACATGTAATTAATATTAATACACATATCATATCGTTTTAGGTGAGATCGCTGATCCGATCGTTAACCTTTCACTTGTTT…	726	A	T
isotig02025	ATTGCTTCATTGTGTAACACTACCTGCTGAGTGTGCTGGGTTCTTCTGATGCCTCTCTCTAAATCCCCTGGATATCCGTGAGTGACCAAACTGGTGTGTTTTTCTCGTGAATATTTACCTTGCAATTGAAATTCACATTGTCTGCATTGATTTTAAGGTCAAGGGCTTCATTTGAGTATTGGGTTGTCTGTTTTCGTTGAGGCCTGGTCATTTGGAGCAGAAAGATGAATTGGGTTGTAAGTATTTGAGCGATAATGAGCAGAGAGTCTTCGTGGGTCGTTGTTCCTTGAATTGAATCCAAACGGGCTATGTACATTTGACAAAATTGAGCACAGAACTGAAGTGGGTCTTGGGAGATTCATCTAAATAATGGCGTGGGTTTTGGGGACATTCAACCAA…	67	C	A
isotig02025	ATTGCTTCATTGTGTAACACTACCTGCTGAGTGTGCTGGGTTCTTCTGATGCCTCTCTCTAAATCCCCTGGATATCCGTGAGTGACCAAACTGGTGTGTTTTTCTCGTGAATATTTACCTTGCAATTGAAATTCACATTGTCTGCATTGATTTTAAGGTCAAGGGCTTCATTTGAGTATTGGGTTGTCTGTTTTCGTTGAGGCCTGGTCATTTGGAGCAGAAAGATGAATTGGGTTGTAAGTATTTGAGCGATAATGAGCAGAGAGTCTTCGTGGGTCGTTGTTCCTTGAATTGAATCCAAACGGGCTATGTACATTTGACAAAATTGAGCACAGAACTGAAGTGGGTCTTGGGAGATTCATCTAAATAATGGCGTGGGTTTTGGGGACATTCAACCAA…	424	T	C
isotig02025	ATTGCTTCATTGTGTAACACTACCTGCTGAGTGTGCTGGGTTCTTCTGATGCCTCTCTCTAAATCCCCTGGATATCCGTGAGTGACCAAACTGGTGTGTTTTTCTCGTGAATATTTACCTTGCAATTGAAATTCACATTGTCTGCATTGATTTTAAGGTCAAGGGCTTCATTTGAGTATTGGGTTGTCTGTTTTCGTTGAGGCCTGGTCATTTGGAGCAGAAAGATGAATTGGGTTGTAAGTATTTGAGCGATAATGAGCAGAGAGTCTTCGTGGGTCGTTGTTCCTTGAATTGAATCCAAACGGGCTATGTACATTTGACAAAATTGAGCACAGAACTGAAGTGGGTCTTGGGAGATTCATCTAAATAATGGCGTGGGTTTTGGGGACATTCAACCAA…	439	T	A
isotig02025	ATTGCTTCATTGTGTAACACTACCTGCTGAGTGTGCTGGGTTCTTCTGATGCCTCTCTCTAAATCCCCTGGATATCCGTGAGTGACCAAACTGGTGTGTTTTTCTCGTGAATATTTACCTTGCAATTGAAATTCACATTGTCTGCATTGATTTTAAGGTCAAGGGCTTCATTTGAGTATTGGGTTGTCTGTTTTCGTTGAGGCCTGGTCATTTGGAGCAGAAAGATGAATTGGGTTGTAAGTATTTGAGCGATAATGAGCAGAGAGTCTTCGTGGGTCGTTGTTCCTTGAATTGAATCCAAACGGGCTATGTACATTTGACAAAATTGAGCACAGAACTGAAGTGGGTCTTGGGAGATTCATCTAAATAATGGCGTGGGTTTTGGGGACATTCAACCAA…	1909	T	C
isotig02025	ATTGCTTCATTGTGTAACACTACCTGCTGAGTGTGCTGGGTTCTTCTGATGCCTCTCTCTAAATCCCCTGGATATCCGTGAGTGACCAAACTGGTGTGTTTTTCTCGTGAATATTTACCTTGCAATTGAAATTCACATTGTCTGCATTGATTTTAAGGTCAAGGGCTTCATTTGAGTATTGGGTTGTCTGTTTTCGTTGAGGCCTGGTCATTTGGAGCAGAAAGATGAATTGGGTTGTAAGTATTTGAGCGATAATGAGCAGAGAGTCTTCGTGGGTCGTTGTTCCTTGAATTGAATCCAAACGGGCTATGTACATTTGACAAAATTGAGCACAGAACTGAAGTGGGTCTTGGGAGATTCATCTAAATAATGGCGTGGGTTTTGGGGACATTCAACCAA…	2408	A	G
isotig02025	ATTGCTTCATTGTGTAACACTACCTGCTGAGTGTGCTGGGTTCTTCTGATGCCTCTCTCTAAATCCCCTGGATATCCGTGAGTGACCAAACTGGTGTGTTTTTCTCGTGAATATTTACCTTGCAATTGAAATTCACATTGTCTGCATTGATTTTAAGGTCAAGGGCTTCATTTGAGTATTGGGTTGTCTGTTTTCGTTGAGGCCTGGTCATTTGGAGCAGAAAGATGAATTGGGTTGTAAGTATTTGAGCGATAATGAGCAGAGAGTCTTCGTGGGTCGTTGTTCCTTGAATTGAATCCAAACGGGCTATGTACATTTGACAAAATTGAGCACAGAACTGAAGTGGGTCTTGGGAGATTCATCTAAATAATGGCGTGGGTTTTGGGGACATTCAACCAA…	3015	A	G
isotig02025	ATTGCTTCATTGTGTAACACTACCTGCTGAGTGTGCTGGGTTCTTCTGATGCCTCTCTCTAAATCCCCTGGATATCCGTGAGTGACCAAACTGGTGTGTTTTTCTCGTGAATATTTACCTTGCAATTGAAATTCACATTGTCTGCATTGATTTTAAGGTCAAGGGCTTCATTTGAGTATTGGGTTGTCTGTTTTCGTTGAGGCCTGGTCATTTGGAGCAGAAAGATGAATTGGGTTGTAAGTATTTGAGCGATAATGAGCAGAGAGTCTTCGTGGGTCGTTGTTCCTTGAATTGAATCCAAACGGGCTATGTACATTTGACAAAATTGAGCACAGAACTGAAGTGGGTCTTGGGAGATTCATCTAAATAATGGCGTGGGTTTTGGGGACATTCAACCAA…	3099	G	A
isotig02025	ATTGCTTCATTGTGTAACACTACCTGCTGAGTGTGCTGGGTTCTTCTGATGCCTCTCTCTAAATCCCCTGGATATCCGTGAGTGACCAAACTGGTGTGTTTTTCTCGTGAATATTTACCTTGCAATTGAAATTCACATTGTCTGCATTGATTTTAAGGTCAAGGGCTTCATTTGAGTATTGGGTTGTCTGTTTTCGTTGAGGCCTGGTCATTTGGAGCAGAAAGATGAATTGGGTTGTAAGTATTTGAGCGATAATGAGCAGAGAGTCTTCGTGGGTCGTTGTTCCTTGAATTGAATCCAAACGGGCTATGTACATTTGACAAAATTGAGCACAGAACTGAAGTGGGTCTTGGGAGATTCATCTAAATAATGGCGTGGGTTTTGGGGACATTCAACCAA…	3222	T	G
isotig02025	ATTGCTTCATTGTGTAACACTACCTGCTGAGTGTGCTGGGTTCTTCTGATGCCTCTCTCTAAATCCCCTGGATATCCGTGAGTGACCAAACTGGTGTGTTTTTCTCGTGAATATTTACCTTGCAATTGAAATTCACATTGTCTGCATTGATTTTAAGGTCAAGGGCTTCATTTGAGTATTGGGTTGTCTGTTTTCGTTGAGGCCTGGTCATTTGGAGCAGAAAGATGAATTGGGTTGTAAGTATTTGAGCGATAATGAGCAGAGAGTCTTCGTGGGTCGTTGTTCCTTGAATTGAATCCAAACGGGCTATGTACATTTGACAAAATTGAGCACAGAACTGAAGTGGGTCTTGGGAGATTCATCTAAATAATGGCGTGGGTTTTGGGGACATTCAACCAA…	3311	C	A
isotig02025	ATTGCTTCATTGTGTAACACTACCTGCTGAGTGTGCTGGGTTCTTCTGATGCCTCTCTCTAAATCCCCTGGATATCCGTGAGTGACCAAACTGGTGTGTTTTTCTCGTGAATATTTACCTTGCAATTGAAATTCACATTGTCTGCATTGATTTTAAGGTCAAGGGCTTCATTTGAGTATTGGGTTGTCTGTTTTCGTTGAGGCCTGGTCATTTGGAGCAGAAAGATGAATTGGGTTGTAAGTATTTGAGCGATAATGAGCAGAGAGTCTTCGTGGGTCGTTGTTCCTTGAATTGAATCCAAACGGGCTATGTACATTTGACAAAATTGAGCACAGAACTGAAGTGGGTCTTGGGAGATTCATCTAAATAATGGCGTGGGTTTTGGGGACATTCAACCAA…	3351	C	A
isotig02103	GGCCAAAACCATACCAAGAGAATAGGCATTCAAAGAAAAATAAAGCAGCAACCATATATGGTAGACTGGTGGGCACTACATTGTCCAACTGGAGGGGTAGATGTAGAGTCAAGCATATAGAACCAAGTTATAAAACTGCATGACACACTGATGCCAACAATTCTGTTACACTAGTAGTACTCTGCCATTACAGTGGGGGGGATACCACCCTGACAAACACAGCCATAACCCCAACACATAAACTCCCTGGTCCTTGGGATCATATATATAAATTACATTTATCCACATCCTAGTAGACATGGCTGACCAAATATAGATAAGTAAATGAAACTAAATCAAATCTACAGGATAATAGAAACACTTCGCATTAAACTGAGTCAACAAGAAAGGTACTTTTCT…	171	C	T
isotig02103	GGCCAAAACCATACCAAGAGAATAGGCATTCAAAGAAAAATAAAGCAGCAACCATATATGGTAGACTGGTGGGCACTACATTGTCCAACTGGAGGGGTAGATGTAGAGTCAAGCATATAGAACCAAGTTATAAAACTGCATGACACACTGATGCCAACAATTCTGTTACACTAGTAGTACTCTGCCATTACAGTGGGGGGGATACCACCCTGACAAACACAGCCATAACCCCAACACATAAACTCCCTGGTCCTTGGGATCATATATATAAATTACATTTATCCACATCCTAGTAGACATGGCTGACCAAATATAGATAAGTAAATGAAACTAAATCAAATCTACAGGATAATAGAAACACTTCGCATTAAACTGAGTCAACAAGAAAGGTACTTTTCT…	278	T	C
isotig02176	CGCACATTTATAAAACATCGGGATTGCTACAGAGGAAAAAGTTCAATCCTTCTTGGAAAGTGAGAAGCAAAAATACACATAGAAGTCAAAATATTACAGTCATTCAAAAATAAAGCTATTGGGAGAAGCTCCTCTTCTTGAGAGAAGAAGCAACCTCATTGGAAAATGTCTTTTAGTTGGAGGTAAAAACAGAAATTGCTTAGCTAAAGCAAAACAAACAACCATTGGAAAATGTCTTTTAGTTGGAGGTAGGAACAGAAATTGCATGGCTAAAGCAAAACAAGCAATCTAATTAGCAGAAGACCCTCTTCCTTGAATCTCGAAAACAATACAAGCAACCTAACCGGAAGATCATGTTTTTTTCATTCAGATAACCTTCAACTTTGAAACTTTCCCATT…	545	C	G
isotig02176	CGCACATTTATAAAACATCGGGATTGCTACAGAGGAAAAAGTTCAATCCTTCTTGGAAAGTGAGAAGCAAAAATACACATAGAAGTCAAAATATTACAGTCATTCAAAAATAAAGCTATTGGGAGAAGCTCCTCTTCTTGAGAGAAGAAGCAACCTCATTGGAAAATGTCTTTTAGTTGGAGGTAAAAACAGAAATTGCTTAGCTAAAGCAAAACAAACAACCATTGGAAAATGTCTTTTAGTTGGAGGTAGGAACAGAAATTGCATGGCTAAAGCAAAACAAGCAATCTAATTAGCAGAAGACCCTCTTCCTTGAATCTCGAAAACAATACAAGCAACCTAACCGGAAGATCATGTTTTTTTCATTCAGATAACCTTCAACTTTGAAACTTTCCCATT…	1522	G	C
isotig02176	CGCACATTTATAAAACATCGGGATTGCTACAGAGGAAAAAGTTCAATCCTTCTTGGAAAGTGAGAAGCAAAAATACACATAGAAGTCAAAATATTACAGTCATTCAAAAATAAAGCTATTGGGAGAAGCTCCTCTTCTTGAGAGAAGAAGCAACCTCATTGGAAAATGTCTTTTAGTTGGAGGTAAAAACAGAAATTGCTTAGCTAAAGCAAAACAAACAACCATTGGAAAATGTCTTTTAGTTGGAGGTAGGAACAGAAATTGCATGGCTAAAGCAAAACAAGCAATCTAATTAGCAGAAGACCCTCTTCCTTGAATCTCGAAAACAATACAAGCAACCTAACCGGAAGATCATGTTTTTTTCATTCAGATAACCTTCAACTTTGAAACTTTCCCATT…	1576	G	A
isotig02176	CGCACATTTATAAAACATCGGGATTGCTACAGAGGAAAAAGTTCAATCCTTCTTGGAAAGTGAGAAGCAAAAATACACATAGAAGTCAAAATATTACAGTCATTCAAAAATAAAGCTATTGGGAGAAGCTCCTCTTCTTGAGAGAAGAAGCAACCTCATTGGAAAATGTCTTTTAGTTGGAGGTAAAAACAGAAATTGCTTAGCTAAAGCAAAACAAACAACCATTGGAAAATGTCTTTTAGTTGGAGGTAGGAACAGAAATTGCATGGCTAAAGCAAAACAAGCAATCTAATTAGCAGAAGACCCTCTTCCTTGAATCTCGAAAACAATACAAGCAACCTAACCGGAAGATCATGTTTTTTTCATTCAGATAACCTTCAACTTTGAAACTTTCCCATT…	1607	C	T
isotig02176	CGCACATTTATAAAACATCGGGATTGCTACAGAGGAAAAAGTTCAATCCTTCTTGGAAAGTGAGAAGCAAAAATACACATAGAAGTCAAAATATTACAGTCATTCAAAAATAAAGCTATTGGGAGAAGCTCCTCTTCTTGAGAGAAGAAGCAACCTCATTGGAAAATGTCTTTTAGTTGGAGGTAAAAACAGAAATTGCTTAGCTAAAGCAAAACAAACAACCATTGGAAAATGTCTTTTAGTTGGAGGTAGGAACAGAAATTGCATGGCTAAAGCAAAACAAGCAATCTAATTAGCAGAAGACCCTCTTCCTTGAATCTCGAAAACAATACAAGCAACCTAACCGGAAGATCATGTTTTTTTCATTCAGATAACCTTCAACTTTGAAACTTTCCCATT…	1670	T	C
isotig02198	ACATTTAGGAGTCAGTTCAGTATATTAAGGATTTGAACCAGAATTAGTTCAACAGAACCTTTCTAATATAAATGTAAGCCTACAGGCAGAGTGTAAAAGGAGAAAAGGCCATTGATATTGAAGATCAGGGCTGTGAGACAGAGGGTCTCGATATGTAATCAGTTGTTTATACTTTATACTTGTTTATACAGAGGTTTATCCCGGAACTGTGTAAGTGTGTGAATCGAGTATTTAATGATTGATTTATGTGTGAATTCGTAGGTTCTGTAACATAGGTTACAGGCAGAGTTCTGAAGAAATACACAATGGAGGAGCGGAGCGGAGAGGAGAGGAGAGGAGCCGAGGCGCAGAGCGGACTTGCGAAAAGATTTGAATCGAAATGGCCAGGATTAAGGTTCA…	963	T	C
isotig02198	ACATTTAGGAGTCAGTTCAGTATATTAAGGATTTGAACCAGAATTAGTTCAACAGAACCTTTCTAATATAAATGTAAGCCTACAGGCAGAGTGTAAAAGGAGAAAAGGCCATTGATATTGAAGATCAGGGCTGTGAGACAGAGGGTCTCGATATGTAATCAGTTGTTTATACTTTATACTTGTTTATACAGAGGTTTATCCCGGAACTGTGTAAGTGTGTGAATCGAGTATTTAATGATTGATTTATGTGTGAATTCGTAGGTTCTGTAACATAGGTTACAGGCAGAGTTCTGAAGAAATACACAATGGAGGAGCGGAGCGGAGAGGAGAGGAGAGGAGCCGAGGCGCAGAGCGGACTTGCGAAAAGATTTGAATCGAAATGGCCAGGATTAAGGTTCA…	1044	G	A
isotig02198	ACATTTAGGAGTCAGTTCAGTATATTAAGGATTTGAACCAGAATTAGTTCAACAGAACCTTTCTAATATAAATGTAAGCCTACAGGCAGAGTGTAAAAGGAGAAAAGGCCATTGATATTGAAGATCAGGGCTGTGAGACAGAGGGTCTCGATATGTAATCAGTTGTTTATACTTTATACTTGTTTATACAGAGGTTTATCCCGGAACTGTGTAAGTGTGTGAATCGAGTATTTAATGATTGATTTATGTGTGAATTCGTAGGTTCTGTAACATAGGTTACAGGCAGAGTTCTGAAGAAATACACAATGGAGGAGCGGAGCGGAGAGGAGAGGAGAGGAGCCGAGGCGCAGAGCGGACTTGCGAAAAGATTTGAATCGAAATGGCCAGGATTAAGGTTCA…	1113	C	T
isotig02198	ACATTTAGGAGTCAGTTCAGTATATTAAGGATTTGAACCAGAATTAGTTCAACAGAACCTTTCTAATATAAATGTAAGCCTACAGGCAGAGTGTAAAAGGAGAAAAGGCCATTGATATTGAAGATCAGGGCTGTGAGACAGAGGGTCTCGATATGTAATCAGTTGTTTATACTTTATACTTGTTTATACAGAGGTTTATCCCGGAACTGTGTAAGTGTGTGAATCGAGTATTTAATGATTGATTTATGTGTGAATTCGTAGGTTCTGTAACATAGGTTACAGGCAGAGTTCTGAAGAAATACACAATGGAGGAGCGGAGCGGAGAGGAGAGGAGAGGAGCCGAGGCGCAGAGCGGACTTGCGAAAAGATTTGAATCGAAATGGCCAGGATTAAGGTTCA…	1318	A	G
isotig02273	GCTATTGTGCGCACAGATAGAACCGGAAACAAAAGAGGAGAGTATTCTACTCGTCTTCTTTTAACTCCATTTCTTCCGTTTTTAAACGTGAGAACATGTCAGTGATGTAAAAGCAGGCTCAGCACATTAACAGCAGTAAAAAAAAGATATGCAAGCATGGCAACATTTACCAATGAGGATTTCGTCATTAAAATTTGAGACTATTGCATTGGTAATAGATGGGGAATGCATCCAGCACTGTCTTATTTGCAATTTCGTCCAGAAAAATCAAGTGTAAGCTCTACTGTGCTGTCTCCTATTAGCATGCAGCCAGAAGCCCATTACAGTGAGGCTTCATAGCATAAATAAATAAATAAGAGGTGAAGGGAAAGTGAGAACTGACACGCTGGCATCTTCCCG…	1053	C	G
isotig02273	GCTATTGTGCGCACAGATAGAACCGGAAACAAAAGAGGAGAGTATTCTACTCGTCTTCTTTTAACTCCATTTCTTCCGTTTTTAAACGTGAGAACATGTCAGTGATGTAAAAGCAGGCTCAGCACATTAACAGCAGTAAAAAAAAGATATGCAAGCATGGCAACATTTACCAATGAGGATTTCGTCATTAAAATTTGAGACTATTGCATTGGTAATAGATGGGGAATGCATCCAGCACTGTCTTATTTGCAATTTCGTCCAGAAAAATCAAGTGTAAGCTCTACTGTGCTGTCTCCTATTAGCATGCAGCCAGAAGCCCATTACAGTGAGGCTTCATAGCATAAATAAATAAATAAGAGGTGAAGGGAAAGTGAGAACTGACACGCTGGCATCTTCCCG…	1090	A	G
isotig02273	GCTATTGTGCGCACAGATAGAACCGGAAACAAAAGAGGAGAGTATTCTACTCGTCTTCTTTTAACTCCATTTCTTCCGTTTTTAAACGTGAGAACATGTCAGTGATGTAAAAGCAGGCTCAGCACATTAACAGCAGTAAAAAAAAGATATGCAAGCATGGCAACATTTACCAATGAGGATTTCGTCATTAAAATTTGAGACTATTGCATTGGTAATAGATGGGGAATGCATCCAGCACTGTCTTATTTGCAATTTCGTCCAGAAAAATCAAGTGTAAGCTCTACTGTGCTGTCTCCTATTAGCATGCAGCCAGAAGCCCATTACAGTGAGGCTTCATAGCATAAATAAATAAATAAGAGGTGAAGGGAAAGTGAGAACTGACACGCTGGCATCTTCCCG…	1415	T	C
isotig02273	GCTATTGTGCGCACAGATAGAACCGGAAACAAAAGAGGAGAGTATTCTACTCGTCTTCTTTTAACTCCATTTCTTCCGTTTTTAAACGTGAGAACATGTCAGTGATGTAAAAGCAGGCTCAGCACATTAACAGCAGTAAAAAAAAGATATGCAAGCATGGCAACATTTACCAATGAGGATTTCGTCATTAAAATTTGAGACTATTGCATTGGTAATAGATGGGGAATGCATCCAGCACTGTCTTATTTGCAATTTCGTCCAGAAAAATCAAGTGTAAGCTCTACTGTGCTGTCTCCTATTAGCATGCAGCCAGAAGCCCATTACAGTGAGGCTTCATAGCATAAATAAATAAATAAGAGGTGAAGGGAAAGTGAGAACTGACACGCTGGCATCTTCCCG…	1420	A	G
isotig02273	GCTATTGTGCGCACAGATAGAACCGGAAACAAAAGAGGAGAGTATTCTACTCGTCTTCTTTTAACTCCATTTCTTCCGTTTTTAAACGTGAGAACATGTCAGTGATGTAAAAGCAGGCTCAGCACATTAACAGCAGTAAAAAAAAGATATGCAAGCATGGCAACATTTACCAATGAGGATTTCGTCATTAAAATTTGAGACTATTGCATTGGTAATAGATGGGGAATGCATCCAGCACTGTCTTATTTGCAATTTCGTCCAGAAAAATCAAGTGTAAGCTCTACTGTGCTGTCTCCTATTAGCATGCAGCCAGAAGCCCATTACAGTGAGGCTTCATAGCATAAATAAATAAATAAGAGGTGAAGGGAAAGTGAGAACTGACACGCTGGCATCTTCCCG…	1577	T	C
isotig02273	GCTATTGTGCGCACAGATAGAACCGGAAACAAAAGAGGAGAGTATTCTACTCGTCTTCTTTTAACTCCATTTCTTCCGTTTTTAAACGTGAGAACATGTCAGTGATGTAAAAGCAGGCTCAGCACATTAACAGCAGTAAAAAAAAGATATGCAAGCATGGCAACATTTACCAATGAGGATTTCGTCATTAAAATTTGAGACTATTGCATTGGTAATAGATGGGGAATGCATCCAGCACTGTCTTATTTGCAATTTCGTCCAGAAAAATCAAGTGTAAGCTCTACTGTGCTGTCTCCTATTAGCATGCAGCCAGAAGCCCATTACAGTGAGGCTTCATAGCATAAATAAATAAATAAGAGGTGAAGGGAAAGTGAGAACTGACACGCTGGCATCTTCCCG…	1602	T	C
isotig02273	GCTATTGTGCGCACAGATAGAACCGGAAACAAAAGAGGAGAGTATTCTACTCGTCTTCTTTTAACTCCATTTCTTCCGTTTTTAAACGTGAGAACATGTCAGTGATGTAAAAGCAGGCTCAGCACATTAACAGCAGTAAAAAAAAGATATGCAAGCATGGCAACATTTACCAATGAGGATTTCGTCATTAAAATTTGAGACTATTGCATTGGTAATAGATGGGGAATGCATCCAGCACTGTCTTATTTGCAATTTCGTCCAGAAAAATCAAGTGTAAGCTCTACTGTGCTGTCTCCTATTAGCATGCAGCCAGAAGCCCATTACAGTGAGGCTTCATAGCATAAATAAATAAATAAGAGGTGAAGGGAAAGTGAGAACTGACACGCTGGCATCTTCCCG…	1629	T	C
isotig02337	GACCTTCCACATTCCCTCCTCCCATCGGGCTTTCCTCTGCACCTCTCGGTGCAATAACTAGTTATAAACCCTAGAATATTAGGGTTTATTGACACATATCATAGATTTTAGGGTTTATTGATACCTACCATAGATTCGATTCGAGTGCATTCCGTGGTTGCGGCTGAGTCGGGGCAACAGCTTCAAAATGGTCTTACGGGCTTGGTGCGCTCCTGTAAGCTCGGGGGGACAAAGTAGCAATATAGAGAAATTTTCTTAAATAACTTTTTATTTCTTCTACCAACGAACGAATACTGCGTACCATGCTTCTGGTGCTTCCTTTGGTACAACGAAAAACGTAATCGCGTATACAAAAGTGGGGTGCCAAAATGGGGTTTAAGGGAACCAAGGCCGAGAAGA…	155	T	C
isotig02337	GACCTTCCACATTCCCTCCTCCCATCGGGCTTTCCTCTGCACCTCTCGGTGCAATAACTAGTTATAAACCCTAGAATATTAGGGTTTATTGACACATATCATAGATTTTAGGGTTTATTGATACCTACCATAGATTCGATTCGAGTGCATTCCGTGGTTGCGGCTGAGTCGGGGCAACAGCTTCAAAATGGTCTTACGGGCTTGGTGCGCTCCTGTAAGCTCGGGGGGACAAAGTAGCAATATAGAGAAATTTTCTTAAATAACTTTTTATTTCTTCTACCAACGAACGAATACTGCGTACCATGCTTCTGGTGCTTCCTTTGGTACAACGAAAAACGTAATCGCGTATACAAAAGTGGGGTGCCAAAATGGGGTTTAAGGGAACCAAGGCCGAGAAGA…	210	C	T
isotig02337	GACCTTCCACATTCCCTCCTCCCATCGGGCTTTCCTCTGCACCTCTCGGTGCAATAACTAGTTATAAACCCTAGAATATTAGGGTTTATTGACACATATCATAGATTTTAGGGTTTATTGATACCTACCATAGATTCGATTCGAGTGCATTCCGTGGTTGCGGCTGAGTCGGGGCAACAGCTTCAAAATGGTCTTACGGGCTTGGTGCGCTCCTGTAAGCTCGGGGGGACAAAGTAGCAATATAGAGAAATTTTCTTAAATAACTTTTTATTTCTTCTACCAACGAACGAATACTGCGTACCATGCTTCTGGTGCTTCCTTTGGTACAACGAAAAACGTAATCGCGTATACAAAAGTGGGGTGCCAAAATGGGGTTTAAGGGAACCAAGGCCGAGAAGA…	304	T	C
isotig02337	GACCTTCCACATTCCCTCCTCCCATCGGGCTTTCCTCTGCACCTCTCGGTGCAATAACTAGTTATAAACCCTAGAATATTAGGGTTTATTGACACATATCATAGATTTTAGGGTTTATTGATACCTACCATAGATTCGATTCGAGTGCATTCCGTGGTTGCGGCTGAGTCGGGGCAACAGCTTCAAAATGGTCTTACGGGCTTGGTGCGCTCCTGTAAGCTCGGGGGGACAAAGTAGCAATATAGAGAAATTTTCTTAAATAACTTTTTATTTCTTCTACCAACGAACGAATACTGCGTACCATGCTTCTGGTGCTTCCTTTGGTACAACGAAAAACGTAATCGCGTATACAAAAGTGGGGTGCCAAAATGGGGTTTAAGGGAACCAAGGCCGAGAAGA…	362	T	G
isotig02337	GACCTTCCACATTCCCTCCTCCCATCGGGCTTTCCTCTGCACCTCTCGGTGCAATAACTAGTTATAAACCCTAGAATATTAGGGTTTATTGACACATATCATAGATTTTAGGGTTTATTGATACCTACCATAGATTCGATTCGAGTGCATTCCGTGGTTGCGGCTGAGTCGGGGCAACAGCTTCAAAATGGTCTTACGGGCTTGGTGCGCTCCTGTAAGCTCGGGGGGACAAAGTAGCAATATAGAGAAATTTTCTTAAATAACTTTTTATTTCTTCTACCAACGAACGAATACTGCGTACCATGCTTCTGGTGCTTCCTTTGGTACAACGAAAAACGTAATCGCGTATACAAAAGTGGGGTGCCAAAATGGGGTTTAAGGGAACCAAGGCCGAGAAGA…	377	T	C
isotig02337	GACCTTCCACATTCCCTCCTCCCATCGGGCTTTCCTCTGCACCTCTCGGTGCAATAACTAGTTATAAACCCTAGAATATTAGGGTTTATTGACACATATCATAGATTTTAGGGTTTATTGATACCTACCATAGATTCGATTCGAGTGCATTCCGTGGTTGCGGCTGAGTCGGGGCAACAGCTTCAAAATGGTCTTACGGGCTTGGTGCGCTCCTGTAAGCTCGGGGGGACAAAGTAGCAATATAGAGAAATTTTCTTAAATAACTTTTTATTTCTTCTACCAACGAACGAATACTGCGTACCATGCTTCTGGTGCTTCCTTTGGTACAACGAAAAACGTAATCGCGTATACAAAAGTGGGGTGCCAAAATGGGGTTTAAGGGAACCAAGGCCGAGAAGA…	428	C	T
isotig02337	GACCTTCCACATTCCCTCCTCCCATCGGGCTTTCCTCTGCACCTCTCGGTGCAATAACTAGTTATAAACCCTAGAATATTAGGGTTTATTGACACATATCATAGATTTTAGGGTTTATTGATACCTACCATAGATTCGATTCGAGTGCATTCCGTGGTTGCGGCTGAGTCGGGGCAACAGCTTCAAAATGGTCTTACGGGCTTGGTGCGCTCCTGTAAGCTCGGGGGGACAAAGTAGCAATATAGAGAAATTTTCTTAAATAACTTTTTATTTCTTCTACCAACGAACGAATACTGCGTACCATGCTTCTGGTGCTTCCTTTGGTACAACGAAAAACGTAATCGCGTATACAAAAGTGGGGTGCCAAAATGGGGTTTAAGGGAACCAAGGCCGAGAAGA…	440	A	G
isotig02337	GACCTTCCACATTCCCTCCTCCCATCGGGCTTTCCTCTGCACCTCTCGGTGCAATAACTAGTTATAAACCCTAGAATATTAGGGTTTATTGACACATATCATAGATTTTAGGGTTTATTGATACCTACCATAGATTCGATTCGAGTGCATTCCGTGGTTGCGGCTGAGTCGGGGCAACAGCTTCAAAATGGTCTTACGGGCTTGGTGCGCTCCTGTAAGCTCGGGGGGACAAAGTAGCAATATAGAGAAATTTTCTTAAATAACTTTTTATTTCTTCTACCAACGAACGAATACTGCGTACCATGCTTCTGGTGCTTCCTTTGGTACAACGAAAAACGTAATCGCGTATACAAAAGTGGGGTGCCAAAATGGGGTTTAAGGGAACCAAGGCCGAGAAGA…	452	T	G
isotig02337	GACCTTCCACATTCCCTCCTCCCATCGGGCTTTCCTCTGCACCTCTCGGTGCAATAACTAGTTATAAACCCTAGAATATTAGGGTTTATTGACACATATCATAGATTTTAGGGTTTATTGATACCTACCATAGATTCGATTCGAGTGCATTCCGTGGTTGCGGCTGAGTCGGGGCAACAGCTTCAAAATGGTCTTACGGGCTTGGTGCGCTCCTGTAAGCTCGGGGGGACAAAGTAGCAATATAGAGAAATTTTCTTAAATAACTTTTTATTTCTTCTACCAACGAACGAATACTGCGTACCATGCTTCTGGTGCTTCCTTTGGTACAACGAAAAACGTAATCGCGTATACAAAAGTGGGGTGCCAAAATGGGGTTTAAGGGAACCAAGGCCGAGAAGA…	456	A	G
isotig02337	GACCTTCCACATTCCCTCCTCCCATCGGGCTTTCCTCTGCACCTCTCGGTGCAATAACTAGTTATAAACCCTAGAATATTAGGGTTTATTGACACATATCATAGATTTTAGGGTTTATTGATACCTACCATAGATTCGATTCGAGTGCATTCCGTGGTTGCGGCTGAGTCGGGGCAACAGCTTCAAAATGGTCTTACGGGCTTGGTGCGCTCCTGTAAGCTCGGGGGGACAAAGTAGCAATATAGAGAAATTTTCTTAAATAACTTTTTATTTCTTCTACCAACGAACGAATACTGCGTACCATGCTTCTGGTGCTTCCTTTGGTACAACGAAAAACGTAATCGCGTATACAAAAGTGGGGTGCCAAAATGGGGTTTAAGGGAACCAAGGCCGAGAAGA…	470	C	T
isotig02337	GACCTTCCACATTCCCTCCTCCCATCGGGCTTTCCTCTGCACCTCTCGGTGCAATAACTAGTTATAAACCCTAGAATATTAGGGTTTATTGACACATATCATAGATTTTAGGGTTTATTGATACCTACCATAGATTCGATTCGAGTGCATTCCGTGGTTGCGGCTGAGTCGGGGCAACAGCTTCAAAATGGTCTTACGGGCTTGGTGCGCTCCTGTAAGCTCGGGGGGACAAAGTAGCAATATAGAGAAATTTTCTTAAATAACTTTTTATTTCTTCTACCAACGAACGAATACTGCGTACCATGCTTCTGGTGCTTCCTTTGGTACAACGAAAAACGTAATCGCGTATACAAAAGTGGGGTGCCAAAATGGGGTTTAAGGGAACCAAGGCCGAGAAGA…	485	G	A
isotig02337	GACCTTCCACATTCCCTCCTCCCATCGGGCTTTCCTCTGCACCTCTCGGTGCAATAACTAGTTATAAACCCTAGAATATTAGGGTTTATTGACACATATCATAGATTTTAGGGTTTATTGATACCTACCATAGATTCGATTCGAGTGCATTCCGTGGTTGCGGCTGAGTCGGGGCAACAGCTTCAAAATGGTCTTACGGGCTTGGTGCGCTCCTGTAAGCTCGGGGGGACAAAGTAGCAATATAGAGAAATTTTCTTAAATAACTTTTTATTTCTTCTACCAACGAACGAATACTGCGTACCATGCTTCTGGTGCTTCCTTTGGTACAACGAAAAACGTAATCGCGTATACAAAAGTGGGGTGCCAAAATGGGGTTTAAGGGAACCAAGGCCGAGAAGA…	518	C	A
isotig02337	GACCTTCCACATTCCCTCCTCCCATCGGGCTTTCCTCTGCACCTCTCGGTGCAATAACTAGTTATAAACCCTAGAATATTAGGGTTTATTGACACATATCATAGATTTTAGGGTTTATTGATACCTACCATAGATTCGATTCGAGTGCATTCCGTGGTTGCGGCTGAGTCGGGGCAACAGCTTCAAAATGGTCTTACGGGCTTGGTGCGCTCCTGTAAGCTCGGGGGGACAAAGTAGCAATATAGAGAAATTTTCTTAAATAACTTTTTATTTCTTCTACCAACGAACGAATACTGCGTACCATGCTTCTGGTGCTTCCTTTGGTACAACGAAAAACGTAATCGCGTATACAAAAGTGGGGTGCCAAAATGGGGTTTAAGGGAACCAAGGCCGAGAAGA…	524	G	T
isotig02337	GACCTTCCACATTCCCTCCTCCCATCGGGCTTTCCTCTGCACCTCTCGGTGCAATAACTAGTTATAAACCCTAGAATATTAGGGTTTATTGACACATATCATAGATTTTAGGGTTTATTGATACCTACCATAGATTCGATTCGAGTGCATTCCGTGGTTGCGGCTGAGTCGGGGCAACAGCTTCAAAATGGTCTTACGGGCTTGGTGCGCTCCTGTAAGCTCGGGGGGACAAAGTAGCAATATAGAGAAATTTTCTTAAATAACTTTTTATTTCTTCTACCAACGAACGAATACTGCGTACCATGCTTCTGGTGCTTCCTTTGGTACAACGAAAAACGTAATCGCGTATACAAAAGTGGGGTGCCAAAATGGGGTTTAAGGGAACCAAGGCCGAGAAGA…	533	C	T
isotig02337	GACCTTCCACATTCCCTCCTCCCATCGGGCTTTCCTCTGCACCTCTCGGTGCAATAACTAGTTATAAACCCTAGAATATTAGGGTTTATTGACACATATCATAGATTTTAGGGTTTATTGATACCTACCATAGATTCGATTCGAGTGCATTCCGTGGTTGCGGCTGAGTCGGGGCAACAGCTTCAAAATGGTCTTACGGGCTTGGTGCGCTCCTGTAAGCTCGGGGGGACAAAGTAGCAATATAGAGAAATTTTCTTAAATAACTTTTTATTTCTTCTACCAACGAACGAATACTGCGTACCATGCTTCTGGTGCTTCCTTTGGTACAACGAAAAACGTAATCGCGTATACAAAAGTGGGGTGCCAAAATGGGGTTTAAGGGAACCAAGGCCGAGAAGA…	574	A	T
isotig02337	GACCTTCCACATTCCCTCCTCCCATCGGGCTTTCCTCTGCACCTCTCGGTGCAATAACTAGTTATAAACCCTAGAATATTAGGGTTTATTGACACATATCATAGATTTTAGGGTTTATTGATACCTACCATAGATTCGATTCGAGTGCATTCCGTGGTTGCGGCTGAGTCGGGGCAACAGCTTCAAAATGGTCTTACGGGCTTGGTGCGCTCCTGTAAGCTCGGGGGGACAAAGTAGCAATATAGAGAAATTTTCTTAAATAACTTTTTATTTCTTCTACCAACGAACGAATACTGCGTACCATGCTTCTGGTGCTTCCTTTGGTACAACGAAAAACGTAATCGCGTATACAAAAGTGGGGTGCCAAAATGGGGTTTAAGGGAACCAAGGCCGAGAAGA…	596	A	C
isotig02337	GACCTTCCACATTCCCTCCTCCCATCGGGCTTTCCTCTGCACCTCTCGGTGCAATAACTAGTTATAAACCCTAGAATATTAGGGTTTATTGACACATATCATAGATTTTAGGGTTTATTGATACCTACCATAGATTCGATTCGAGTGCATTCCGTGGTTGCGGCTGAGTCGGGGCAACAGCTTCAAAATGGTCTTACGGGCTTGGTGCGCTCCTGTAAGCTCGGGGGGACAAAGTAGCAATATAGAGAAATTTTCTTAAATAACTTTTTATTTCTTCTACCAACGAACGAATACTGCGTACCATGCTTCTGGTGCTTCCTTTGGTACAACGAAAAACGTAATCGCGTATACAAAAGTGGGGTGCCAAAATGGGGTTTAAGGGAACCAAGGCCGAGAAGA…	599	T	C
isotig02337	GACCTTCCACATTCCCTCCTCCCATCGGGCTTTCCTCTGCACCTCTCGGTGCAATAACTAGTTATAAACCCTAGAATATTAGGGTTTATTGACACATATCATAGATTTTAGGGTTTATTGATACCTACCATAGATTCGATTCGAGTGCATTCCGTGGTTGCGGCTGAGTCGGGGCAACAGCTTCAAAATGGTCTTACGGGCTTGGTGCGCTCCTGTAAGCTCGGGGGGACAAAGTAGCAATATAGAGAAATTTTCTTAAATAACTTTTTATTTCTTCTACCAACGAACGAATACTGCGTACCATGCTTCTGGTGCTTCCTTTGGTACAACGAAAAACGTAATCGCGTATACAAAAGTGGGGTGCCAAAATGGGGTTTAAGGGAACCAAGGCCGAGAAGA…	621	C	T
isotig02337	GACCTTCCACATTCCCTCCTCCCATCGGGCTTTCCTCTGCACCTCTCGGTGCAATAACTAGTTATAAACCCTAGAATATTAGGGTTTATTGACACATATCATAGATTTTAGGGTTTATTGATACCTACCATAGATTCGATTCGAGTGCATTCCGTGGTTGCGGCTGAGTCGGGGCAACAGCTTCAAAATGGTCTTACGGGCTTGGTGCGCTCCTGTAAGCTCGGGGGGACAAAGTAGCAATATAGAGAAATTTTCTTAAATAACTTTTTATTTCTTCTACCAACGAACGAATACTGCGTACCATGCTTCTGGTGCTTCCTTTGGTACAACGAAAAACGTAATCGCGTATACAAAAGTGGGGTGCCAAAATGGGGTTTAAGGGAACCAAGGCCGAGAAGA…	767	A	C
isotig02337	GACCTTCCACATTCCCTCCTCCCATCGGGCTTTCCTCTGCACCTCTCGGTGCAATAACTAGTTATAAACCCTAGAATATTAGGGTTTATTGACACATATCATAGATTTTAGGGTTTATTGATACCTACCATAGATTCGATTCGAGTGCATTCCGTGGTTGCGGCTGAGTCGGGGCAACAGCTTCAAAATGGTCTTACGGGCTTGGTGCGCTCCTGTAAGCTCGGGGGGACAAAGTAGCAATATAGAGAAATTTTCTTAAATAACTTTTTATTTCTTCTACCAACGAACGAATACTGCGTACCATGCTTCTGGTGCTTCCTTTGGTACAACGAAAAACGTAATCGCGTATACAAAAGTGGGGTGCCAAAATGGGGTTTAAGGGAACCAAGGCCGAGAAGA…	770	A	G
isotig02337	GACCTTCCACATTCCCTCCTCCCATCGGGCTTTCCTCTGCACCTCTCGGTGCAATAACTAGTTATAAACCCTAGAATATTAGGGTTTATTGACACATATCATAGATTTTAGGGTTTATTGATACCTACCATAGATTCGATTCGAGTGCATTCCGTGGTTGCGGCTGAGTCGGGGCAACAGCTTCAAAATGGTCTTACGGGCTTGGTGCGCTCCTGTAAGCTCGGGGGGACAAAGTAGCAATATAGAGAAATTTTCTTAAATAACTTTTTATTTCTTCTACCAACGAACGAATACTGCGTACCATGCTTCTGGTGCTTCCTTTGGTACAACGAAAAACGTAATCGCGTATACAAAAGTGGGGTGCCAAAATGGGGTTTAAGGGAACCAAGGCCGAGAAGA…	782	G	T
isotig02337	GACCTTCCACATTCCCTCCTCCCATCGGGCTTTCCTCTGCACCTCTCGGTGCAATAACTAGTTATAAACCCTAGAATATTAGGGTTTATTGACACATATCATAGATTTTAGGGTTTATTGATACCTACCATAGATTCGATTCGAGTGCATTCCGTGGTTGCGGCTGAGTCGGGGCAACAGCTTCAAAATGGTCTTACGGGCTTGGTGCGCTCCTGTAAGCTCGGGGGGACAAAGTAGCAATATAGAGAAATTTTCTTAAATAACTTTTTATTTCTTCTACCAACGAACGAATACTGCGTACCATGCTTCTGGTGCTTCCTTTGGTACAACGAAAAACGTAATCGCGTATACAAAAGTGGGGTGCCAAAATGGGGTTTAAGGGAACCAAGGCCGAGAAGA…	827	G	T
isotig02337	GACCTTCCACATTCCCTCCTCCCATCGGGCTTTCCTCTGCACCTCTCGGTGCAATAACTAGTTATAAACCCTAGAATATTAGGGTTTATTGACACATATCATAGATTTTAGGGTTTATTGATACCTACCATAGATTCGATTCGAGTGCATTCCGTGGTTGCGGCTGAGTCGGGGCAACAGCTTCAAAATGGTCTTACGGGCTTGGTGCGCTCCTGTAAGCTCGGGGGGACAAAGTAGCAATATAGAGAAATTTTCTTAAATAACTTTTTATTTCTTCTACCAACGAACGAATACTGCGTACCATGCTTCTGGTGCTTCCTTTGGTACAACGAAAAACGTAATCGCGTATACAAAAGTGGGGTGCCAAAATGGGGTTTAAGGGAACCAAGGCCGAGAAGA…	872	C	T
isotig02337	GACCTTCCACATTCCCTCCTCCCATCGGGCTTTCCTCTGCACCTCTCGGTGCAATAACTAGTTATAAACCCTAGAATATTAGGGTTTATTGACACATATCATAGATTTTAGGGTTTATTGATACCTACCATAGATTCGATTCGAGTGCATTCCGTGGTTGCGGCTGAGTCGGGGCAACAGCTTCAAAATGGTCTTACGGGCTTGGTGCGCTCCTGTAAGCTCGGGGGGACAAAGTAGCAATATAGAGAAATTTTCTTAAATAACTTTTTATTTCTTCTACCAACGAACGAATACTGCGTACCATGCTTCTGGTGCTTCCTTTGGTACAACGAAAAACGTAATCGCGTATACAAAAGTGGGGTGCCAAAATGGGGTTTAAGGGAACCAAGGCCGAGAAGA…	896	G	A
isotig02337	GACCTTCCACATTCCCTCCTCCCATCGGGCTTTCCTCTGCACCTCTCGGTGCAATAACTAGTTATAAACCCTAGAATATTAGGGTTTATTGACACATATCATAGATTTTAGGGTTTATTGATACCTACCATAGATTCGATTCGAGTGCATTCCGTGGTTGCGGCTGAGTCGGGGCAACAGCTTCAAAATGGTCTTACGGGCTTGGTGCGCTCCTGTAAGCTCGGGGGGACAAAGTAGCAATATAGAGAAATTTTCTTAAATAACTTTTTATTTCTTCTACCAACGAACGAATACTGCGTACCATGCTTCTGGTGCTTCCTTTGGTACAACGAAAAACGTAATCGCGTATACAAAAGTGGGGTGCCAAAATGGGGTTTAAGGGAACCAAGGCCGAGAAGA…	908	G	A
isotig02337	GACCTTCCACATTCCCTCCTCCCATCGGGCTTTCCTCTGCACCTCTCGGTGCAATAACTAGTTATAAACCCTAGAATATTAGGGTTTATTGACACATATCATAGATTTTAGGGTTTATTGATACCTACCATAGATTCGATTCGAGTGCATTCCGTGGTTGCGGCTGAGTCGGGGCAACAGCTTCAAAATGGTCTTACGGGCTTGGTGCGCTCCTGTAAGCTCGGGGGGACAAAGTAGCAATATAGAGAAATTTTCTTAAATAACTTTTTATTTCTTCTACCAACGAACGAATACTGCGTACCATGCTTCTGGTGCTTCCTTTGGTACAACGAAAAACGTAATCGCGTATACAAAAGTGGGGTGCCAAAATGGGGTTTAAGGGAACCAAGGCCGAGAAGA…	932	T	C
isotig02337	GACCTTCCACATTCCCTCCTCCCATCGGGCTTTCCTCTGCACCTCTCGGTGCAATAACTAGTTATAAACCCTAGAATATTAGGGTTTATTGACACATATCATAGATTTTAGGGTTTATTGATACCTACCATAGATTCGATTCGAGTGCATTCCGTGGTTGCGGCTGAGTCGGGGCAACAGCTTCAAAATGGTCTTACGGGCTTGGTGCGCTCCTGTAAGCTCGGGGGGACAAAGTAGCAATATAGAGAAATTTTCTTAAATAACTTTTTATTTCTTCTACCAACGAACGAATACTGCGTACCATGCTTCTGGTGCTTCCTTTGGTACAACGAAAAACGTAATCGCGTATACAAAAGTGGGGTGCCAAAATGGGGTTTAAGGGAACCAAGGCCGAGAAGA…	950	G	A
isotig02337	GACCTTCCACATTCCCTCCTCCCATCGGGCTTTCCTCTGCACCTCTCGGTGCAATAACTAGTTATAAACCCTAGAATATTAGGGTTTATTGACACATATCATAGATTTTAGGGTTTATTGATACCTACCATAGATTCGATTCGAGTGCATTCCGTGGTTGCGGCTGAGTCGGGGCAACAGCTTCAAAATGGTCTTACGGGCTTGGTGCGCTCCTGTAAGCTCGGGGGGACAAAGTAGCAATATAGAGAAATTTTCTTAAATAACTTTTTATTTCTTCTACCAACGAACGAATACTGCGTACCATGCTTCTGGTGCTTCCTTTGGTACAACGAAAAACGTAATCGCGTATACAAAAGTGGGGTGCCAAAATGGGGTTTAAGGGAACCAAGGCCGAGAAGA…	962	C	T
isotig02337	GACCTTCCACATTCCCTCCTCCCATCGGGCTTTCCTCTGCACCTCTCGGTGCAATAACTAGTTATAAACCCTAGAATATTAGGGTTTATTGACACATATCATAGATTTTAGGGTTTATTGATACCTACCATAGATTCGATTCGAGTGCATTCCGTGGTTGCGGCTGAGTCGGGGCAACAGCTTCAAAATGGTCTTACGGGCTTGGTGCGCTCCTGTAAGCTCGGGGGGACAAAGTAGCAATATAGAGAAATTTTCTTAAATAACTTTTTATTTCTTCTACCAACGAACGAATACTGCGTACCATGCTTCTGGTGCTTCCTTTGGTACAACGAAAAACGTAATCGCGTATACAAAAGTGGGGTGCCAAAATGGGGTTTAAGGGAACCAAGGCCGAGAAGA…	986	T	G
isotig02337	GACCTTCCACATTCCCTCCTCCCATCGGGCTTTCCTCTGCACCTCTCGGTGCAATAACTAGTTATAAACCCTAGAATATTAGGGTTTATTGACACATATCATAGATTTTAGGGTTTATTGATACCTACCATAGATTCGATTCGAGTGCATTCCGTGGTTGCGGCTGAGTCGGGGCAACAGCTTCAAAATGGTCTTACGGGCTTGGTGCGCTCCTGTAAGCTCGGGGGGACAAAGTAGCAATATAGAGAAATTTTCTTAAATAACTTTTTATTTCTTCTACCAACGAACGAATACTGCGTACCATGCTTCTGGTGCTTCCTTTGGTACAACGAAAAACGTAATCGCGTATACAAAAGTGGGGTGCCAAAATGGGGTTTAAGGGAACCAAGGCCGAGAAGA…	989	G	A
isotig02337	GACCTTCCACATTCCCTCCTCCCATCGGGCTTTCCTCTGCACCTCTCGGTGCAATAACTAGTTATAAACCCTAGAATATTAGGGTTTATTGACACATATCATAGATTTTAGGGTTTATTGATACCTACCATAGATTCGATTCGAGTGCATTCCGTGGTTGCGGCTGAGTCGGGGCAACAGCTTCAAAATGGTCTTACGGGCTTGGTGCGCTCCTGTAAGCTCGGGGGGACAAAGTAGCAATATAGAGAAATTTTCTTAAATAACTTTTTATTTCTTCTACCAACGAACGAATACTGCGTACCATGCTTCTGGTGCTTCCTTTGGTACAACGAAAAACGTAATCGCGTATACAAAAGTGGGGTGCCAAAATGGGGTTTAAGGGAACCAAGGCCGAGAAGA…	1001	C	T
isotig02337	GACCTTCCACATTCCCTCCTCCCATCGGGCTTTCCTCTGCACCTCTCGGTGCAATAACTAGTTATAAACCCTAGAATATTAGGGTTTATTGACACATATCATAGATTTTAGGGTTTATTGATACCTACCATAGATTCGATTCGAGTGCATTCCGTGGTTGCGGCTGAGTCGGGGCAACAGCTTCAAAATGGTCTTACGGGCTTGGTGCGCTCCTGTAAGCTCGGGGGGACAAAGTAGCAATATAGAGAAATTTTCTTAAATAACTTTTTATTTCTTCTACCAACGAACGAATACTGCGTACCATGCTTCTGGTGCTTCCTTTGGTACAACGAAAAACGTAATCGCGTATACAAAAGTGGGGTGCCAAAATGGGGTTTAAGGGAACCAAGGCCGAGAAGA…	1002	A	C
isotig02337	GACCTTCCACATTCCCTCCTCCCATCGGGCTTTCCTCTGCACCTCTCGGTGCAATAACTAGTTATAAACCCTAGAATATTAGGGTTTATTGACACATATCATAGATTTTAGGGTTTATTGATACCTACCATAGATTCGATTCGAGTGCATTCCGTGGTTGCGGCTGAGTCGGGGCAACAGCTTCAAAATGGTCTTACGGGCTTGGTGCGCTCCTGTAAGCTCGGGGGGACAAAGTAGCAATATAGAGAAATTTTCTTAAATAACTTTTTATTTCTTCTACCAACGAACGAATACTGCGTACCATGCTTCTGGTGCTTCCTTTGGTACAACGAAAAACGTAATCGCGTATACAAAAGTGGGGTGCCAAAATGGGGTTTAAGGGAACCAAGGCCGAGAAGA…	1013	G	C
isotig02337	GACCTTCCACATTCCCTCCTCCCATCGGGCTTTCCTCTGCACCTCTCGGTGCAATAACTAGTTATAAACCCTAGAATATTAGGGTTTATTGACACATATCATAGATTTTAGGGTTTATTGATACCTACCATAGATTCGATTCGAGTGCATTCCGTGGTTGCGGCTGAGTCGGGGCAACAGCTTCAAAATGGTCTTACGGGCTTGGTGCGCTCCTGTAAGCTCGGGGGGACAAAGTAGCAATATAGAGAAATTTTCTTAAATAACTTTTTATTTCTTCTACCAACGAACGAATACTGCGTACCATGCTTCTGGTGCTTCCTTTGGTACAACGAAAAACGTAATCGCGTATACAAAAGTGGGGTGCCAAAATGGGGTTTAAGGGAACCAAGGCCGAGAAGA…	1023	G	A
isotig02337	GACCTTCCACATTCCCTCCTCCCATCGGGCTTTCCTCTGCACCTCTCGGTGCAATAACTAGTTATAAACCCTAGAATATTAGGGTTTATTGACACATATCATAGATTTTAGGGTTTATTGATACCTACCATAGATTCGATTCGAGTGCATTCCGTGGTTGCGGCTGAGTCGGGGCAACAGCTTCAAAATGGTCTTACGGGCTTGGTGCGCTCCTGTAAGCTCGGGGGGACAAAGTAGCAATATAGAGAAATTTTCTTAAATAACTTTTTATTTCTTCTACCAACGAACGAATACTGCGTACCATGCTTCTGGTGCTTCCTTTGGTACAACGAAAAACGTAATCGCGTATACAAAAGTGGGGTGCCAAAATGGGGTTTAAGGGAACCAAGGCCGAGAAGA…	1029	A	C
isotig02337	GACCTTCCACATTCCCTCCTCCCATCGGGCTTTCCTCTGCACCTCTCGGTGCAATAACTAGTTATAAACCCTAGAATATTAGGGTTTATTGACACATATCATAGATTTTAGGGTTTATTGATACCTACCATAGATTCGATTCGAGTGCATTCCGTGGTTGCGGCTGAGTCGGGGCAACAGCTTCAAAATGGTCTTACGGGCTTGGTGCGCTCCTGTAAGCTCGGGGGGACAAAGTAGCAATATAGAGAAATTTTCTTAAATAACTTTTTATTTCTTCTACCAACGAACGAATACTGCGTACCATGCTTCTGGTGCTTCCTTTGGTACAACGAAAAACGTAATCGCGTATACAAAAGTGGGGTGCCAAAATGGGGTTTAAGGGAACCAAGGCCGAGAAGA…	1032	A	T
isotig02495	GTCGGATGCCCGATTCCCAACTCACTGTCCCGAACGTCATGTGGATTCCGCGTGGAATTCAGACCGGCCGATCACCTAAACACTCTGGAACTTTGAAAGTGGCCAGCTCATATAAAGAGTTGAATCCAGACTCTCCGACTCAAATAAGCTGTCAATAAACTGCGTTTGAGATTTTGCGTTTCCAGTTCACCTTCTGCACGGATCGTAGCTCCAAATATAACCGACAGCCCACTCCTGGACCTAGGCACCGAATTCTTCTCTAGTAGCTACTCCCTCATCGATGTCGGGATACCCAAATCCTCCCTATGGAGCTTCAGCTCCTCCTCCGAACCACTATGGCGCCCCTCCCCCTAACCAATACGGGCAGCCTCCCCCTAACCAGTATGGGCAGAACGCTTA…	102	G	A
isotig02495	GTCGGATGCCCGATTCCCAACTCACTGTCCCGAACGTCATGTGGATTCCGCGTGGAATTCAGACCGGCCGATCACCTAAACACTCTGGAACTTTGAAAGTGGCCAGCTCATATAAAGAGTTGAATCCAGACTCTCCGACTCAAATAAGCTGTCAATAAACTGCGTTTGAGATTTTGCGTTTCCAGTTCACCTTCTGCACGGATCGTAGCTCCAAATATAACCGACAGCCCACTCCTGGACCTAGGCACCGAATTCTTCTCTAGTAGCTACTCCCTCATCGATGTCGGGATACCCAAATCCTCCCTATGGAGCTTCAGCTCCTCCTCCGAACCACTATGGCGCCCCTCCCCCTAACCAATACGGGCAGCCTCCCCCTAACCAGTATGGGCAGAACGCTTA…	132	T	C
isotig02495	GTCGGATGCCCGATTCCCAACTCACTGTCCCGAACGTCATGTGGATTCCGCGTGGAATTCAGACCGGCCGATCACCTAAACACTCTGGAACTTTGAAAGTGGCCAGCTCATATAAAGAGTTGAATCCAGACTCTCCGACTCAAATAAGCTGTCAATAAACTGCGTTTGAGATTTTGCGTTTCCAGTTCACCTTCTGCACGGATCGTAGCTCCAAATATAACCGACAGCCCACTCCTGGACCTAGGCACCGAATTCTTCTCTAGTAGCTACTCCCTCATCGATGTCGGGATACCCAAATCCTCCCTATGGAGCTTCAGCTCCTCCTCCGAACCACTATGGCGCCCCTCCCCCTAACCAATACGGGCAGCCTCCCCCTAACCAGTATGGGCAGAACGCTTA…	148	G	A
isotig02495	GTCGGATGCCCGATTCCCAACTCACTGTCCCGAACGTCATGTGGATTCCGCGTGGAATTCAGACCGGCCGATCACCTAAACACTCTGGAACTTTGAAAGTGGCCAGCTCATATAAAGAGTTGAATCCAGACTCTCCGACTCAAATAAGCTGTCAATAAACTGCGTTTGAGATTTTGCGTTTCCAGTTCACCTTCTGCACGGATCGTAGCTCCAAATATAACCGACAGCCCACTCCTGGACCTAGGCACCGAATTCTTCTCTAGTAGCTACTCCCTCATCGATGTCGGGATACCCAAATCCTCCCTATGGAGCTTCAGCTCCTCCTCCGAACCACTATGGCGCCCCTCCCCCTAACCAATACGGGCAGCCTCCCCCTAACCAGTATGGGCAGAACGCTTA…	187	T	G
isotig02495	GTCGGATGCCCGATTCCCAACTCACTGTCCCGAACGTCATGTGGATTCCGCGTGGAATTCAGACCGGCCGATCACCTAAACACTCTGGAACTTTGAAAGTGGCCAGCTCATATAAAGAGTTGAATCCAGACTCTCCGACTCAAATAAGCTGTCAATAAACTGCGTTTGAGATTTTGCGTTTCCAGTTCACCTTCTGCACGGATCGTAGCTCCAAATATAACCGACAGCCCACTCCTGGACCTAGGCACCGAATTCTTCTCTAGTAGCTACTCCCTCATCGATGTCGGGATACCCAAATCCTCCCTATGGAGCTTCAGCTCCTCCTCCGAACCACTATGGCGCCCCTCCCCCTAACCAATACGGGCAGCCTCCCCCTAACCAGTATGGGCAGAACGCTTA…	778	A	G
isotig02495	GTCGGATGCCCGATTCCCAACTCACTGTCCCGAACGTCATGTGGATTCCGCGTGGAATTCAGACCGGCCGATCACCTAAACACTCTGGAACTTTGAAAGTGGCCAGCTCATATAAAGAGTTGAATCCAGACTCTCCGACTCAAATAAGCTGTCAATAAACTGCGTTTGAGATTTTGCGTTTCCAGTTCACCTTCTGCACGGATCGTAGCTCCAAATATAACCGACAGCCCACTCCTGGACCTAGGCACCGAATTCTTCTCTAGTAGCTACTCCCTCATCGATGTCGGGATACCCAAATCCTCCCTATGGAGCTTCAGCTCCTCCTCCGAACCACTATGGCGCCCCTCCCCCTAACCAATACGGGCAGCCTCCCCCTAACCAGTATGGGCAGAACGCTTA…	788	C	A
isotig02495	GTCGGATGCCCGATTCCCAACTCACTGTCCCGAACGTCATGTGGATTCCGCGTGGAATTCAGACCGGCCGATCACCTAAACACTCTGGAACTTTGAAAGTGGCCAGCTCATATAAAGAGTTGAATCCAGACTCTCCGACTCAAATAAGCTGTCAATAAACTGCGTTTGAGATTTTGCGTTTCCAGTTCACCTTCTGCACGGATCGTAGCTCCAAATATAACCGACAGCCCACTCCTGGACCTAGGCACCGAATTCTTCTCTAGTAGCTACTCCCTCATCGATGTCGGGATACCCAAATCCTCCCTATGGAGCTTCAGCTCCTCCTCCGAACCACTATGGCGCCCCTCCCCCTAACCAATACGGGCAGCCTCCCCCTAACCAGTATGGGCAGAACGCTTA…	833	T	A
isotig02516	GTTTTCCACCTTCAGGTTCAACCTCAACCGCAACAACCGCTGCACACTTCCCCACTACCGCCGTTGCCGTTGGGAAACCCGTTATACGGCTCAAACTAATTAATGCGCCTACTTTGCCCTAACAGACAGCGTGCTAACCTGCTAAGCCTAGTCTTTTGTTAATATGCCTTTAACCCATCCCGTGAGATGCAAAGGCATTAGGAACGTGTGGTGGAGTCCATGCCTAAGGAACTTTACACTCTCTTTAATCCCTCAAGCCTATAAATTAATGTGCCTGATGGCTGAGCAGCAGCACTGCACTCAGTCCAGAGCTTTGGCTTGAAGGCATAGTGGTCTTAGTTTGTGGGTCTACCCTTTTGACAATGAGGGCATTTTGTGATGTTTCCTTGGTGTTTGGGT…	3009	T	C
isotig02599	ATCATTCATTCGCTTCTTTCCTACCTTTCTTGTAATGCAAGGAAGGGAAATGCGATGGATGTCCCTCATCTAACGAAGGGAGGTATTGGTTTTCATCTGTCTTTAGCGTCTTGCTTGTGGGCATTAAAATAGCATTACTTGTGGGTATTTTTCCTCTCAGGATACAGAGGCGTGCAGTTTTTCTATGGCATTACTTGCTGGTATTTTTTCCTCCCTGATTACAGAGATGTATGGTTTTTTATGAGTACTGTTCTCTGTCCCTAATTTCAGTACTTTTTACTGTTCCTTCCATCCTTTCTCTACCCTTTCTCTACTTGGTTCTGTCTATCTTTAATTTATGTACTTTTCTTGTTTCTGTTATTATATATTCTAACACCTTAACATACCACATACGCTTAT…	1196	T	G
isotig02599	ATCATTCATTCGCTTCTTTCCTACCTTTCTTGTAATGCAAGGAAGGGAAATGCGATGGATGTCCCTCATCTAACGAAGGGAGGTATTGGTTTTCATCTGTCTTTAGCGTCTTGCTTGTGGGCATTAAAATAGCATTACTTGTGGGTATTTTTCCTCTCAGGATACAGAGGCGTGCAGTTTTTCTATGGCATTACTTGCTGGTATTTTTTCCTCCCTGATTACAGAGATGTATGGTTTTTTATGAGTACTGTTCTCTGTCCCTAATTTCAGTACTTTTTACTGTTCCTTCCATCCTTTCTCTACCCTTTCTCTACTTGGTTCTGTCTATCTTTAATTTATGTACTTTTCTTGTTTCTGTTATTATATATTCTAACACCTTAACATACCACATACGCTTAT…	2039	G	A
isotig02599	ATCATTCATTCGCTTCTTTCCTACCTTTCTTGTAATGCAAGGAAGGGAAATGCGATGGATGTCCCTCATCTAACGAAGGGAGGTATTGGTTTTCATCTGTCTTTAGCGTCTTGCTTGTGGGCATTAAAATAGCATTACTTGTGGGTATTTTTCCTCTCAGGATACAGAGGCGTGCAGTTTTTCTATGGCATTACTTGCTGGTATTTTTTCCTCCCTGATTACAGAGATGTATGGTTTTTTATGAGTACTGTTCTCTGTCCCTAATTTCAGTACTTTTTACTGTTCCTTCCATCCTTTCTCTACCCTTTCTCTACTTGGTTCTGTCTATCTTTAATTTATGTACTTTTCTTGTTTCTGTTATTATATATTCTAACACCTTAACATACCACATACGCTTAT…	2056	T	A
isotig02599	ATCATTCATTCGCTTCTTTCCTACCTTTCTTGTAATGCAAGGAAGGGAAATGCGATGGATGTCCCTCATCTAACGAAGGGAGGTATTGGTTTTCATCTGTCTTTAGCGTCTTGCTTGTGGGCATTAAAATAGCATTACTTGTGGGTATTTTTCCTCTCAGGATACAGAGGCGTGCAGTTTTTCTATGGCATTACTTGCTGGTATTTTTTCCTCCCTGATTACAGAGATGTATGGTTTTTTATGAGTACTGTTCTCTGTCCCTAATTTCAGTACTTTTTACTGTTCCTTCCATCCTTTCTCTACCCTTTCTCTACTTGGTTCTGTCTATCTTTAATTTATGTACTTTTCTTGTTTCTGTTATTATATATTCTAACACCTTAACATACCACATACGCTTAT…	2062	C	G
isotig02599	ATCATTCATTCGCTTCTTTCCTACCTTTCTTGTAATGCAAGGAAGGGAAATGCGATGGATGTCCCTCATCTAACGAAGGGAGGTATTGGTTTTCATCTGTCTTTAGCGTCTTGCTTGTGGGCATTAAAATAGCATTACTTGTGGGTATTTTTCCTCTCAGGATACAGAGGCGTGCAGTTTTTCTATGGCATTACTTGCTGGTATTTTTTCCTCCCTGATTACAGAGATGTATGGTTTTTTATGAGTACTGTTCTCTGTCCCTAATTTCAGTACTTTTTACTGTTCCTTCCATCCTTTCTCTACCCTTTCTCTACTTGGTTCTGTCTATCTTTAATTTATGTACTTTTCTTGTTTCTGTTATTATATATTCTAACACCTTAACATACCACATACGCTTAT…	2071	A	C
isotig02599	ATCATTCATTCGCTTCTTTCCTACCTTTCTTGTAATGCAAGGAAGGGAAATGCGATGGATGTCCCTCATCTAACGAAGGGAGGTATTGGTTTTCATCTGTCTTTAGCGTCTTGCTTGTGGGCATTAAAATAGCATTACTTGTGGGTATTTTTCCTCTCAGGATACAGAGGCGTGCAGTTTTTCTATGGCATTACTTGCTGGTATTTTTTCCTCCCTGATTACAGAGATGTATGGTTTTTTATGAGTACTGTTCTCTGTCCCTAATTTCAGTACTTTTTACTGTTCCTTCCATCCTTTCTCTACCCTTTCTCTACTTGGTTCTGTCTATCTTTAATTTATGTACTTTTCTTGTTTCTGTTATTATATATTCTAACACCTTAACATACCACATACGCTTAT…	2119	C	T
isotig02599	ATCATTCATTCGCTTCTTTCCTACCTTTCTTGTAATGCAAGGAAGGGAAATGCGATGGATGTCCCTCATCTAACGAAGGGAGGTATTGGTTTTCATCTGTCTTTAGCGTCTTGCTTGTGGGCATTAAAATAGCATTACTTGTGGGTATTTTTCCTCTCAGGATACAGAGGCGTGCAGTTTTTCTATGGCATTACTTGCTGGTATTTTTTCCTCCCTGATTACAGAGATGTATGGTTTTTTATGAGTACTGTTCTCTGTCCCTAATTTCAGTACTTTTTACTGTTCCTTCCATCCTTTCTCTACCCTTTCTCTACTTGGTTCTGTCTATCTTTAATTTATGTACTTTTCTTGTTTCTGTTATTATATATTCTAACACCTTAACATACCACATACGCTTAT…	2123	A	C
isotig02599	ATCATTCATTCGCTTCTTTCCTACCTTTCTTGTAATGCAAGGAAGGGAAATGCGATGGATGTCCCTCATCTAACGAAGGGAGGTATTGGTTTTCATCTGTCTTTAGCGTCTTGCTTGTGGGCATTAAAATAGCATTACTTGTGGGTATTTTTCCTCTCAGGATACAGAGGCGTGCAGTTTTTCTATGGCATTACTTGCTGGTATTTTTTCCTCCCTGATTACAGAGATGTATGGTTTTTTATGAGTACTGTTCTCTGTCCCTAATTTCAGTACTTTTTACTGTTCCTTCCATCCTTTCTCTACCCTTTCTCTACTTGGTTCTGTCTATCTTTAATTTATGTACTTTTCTTGTTTCTGTTATTATATATTCTAACACCTTAACATACCACATACGCTTAT…	2161	T	G
isotig02599	ATCATTCATTCGCTTCTTTCCTACCTTTCTTGTAATGCAAGGAAGGGAAATGCGATGGATGTCCCTCATCTAACGAAGGGAGGTATTGGTTTTCATCTGTCTTTAGCGTCTTGCTTGTGGGCATTAAAATAGCATTACTTGTGGGTATTTTTCCTCTCAGGATACAGAGGCGTGCAGTTTTTCTATGGCATTACTTGCTGGTATTTTTTCCTCCCTGATTACAGAGATGTATGGTTTTTTATGAGTACTGTTCTCTGTCCCTAATTTCAGTACTTTTTACTGTTCCTTCCATCCTTTCTCTACCCTTTCTCTACTTGGTTCTGTCTATCTTTAATTTATGTACTTTTCTTGTTTCTGTTATTATATATTCTAACACCTTAACATACCACATACGCTTAT…	2181	C	G
isotig02599	ATCATTCATTCGCTTCTTTCCTACCTTTCTTGTAATGCAAGGAAGGGAAATGCGATGGATGTCCCTCATCTAACGAAGGGAGGTATTGGTTTTCATCTGTCTTTAGCGTCTTGCTTGTGGGCATTAAAATAGCATTACTTGTGGGTATTTTTCCTCTCAGGATACAGAGGCGTGCAGTTTTTCTATGGCATTACTTGCTGGTATTTTTTCCTCCCTGATTACAGAGATGTATGGTTTTTTATGAGTACTGTTCTCTGTCCCTAATTTCAGTACTTTTTACTGTTCCTTCCATCCTTTCTCTACCCTTTCTCTACTTGGTTCTGTCTATCTTTAATTTATGTACTTTTCTTGTTTCTGTTATTATATATTCTAACACCTTAACATACCACATACGCTTAT…	2196	A	C
isotig02639	TTTCTATATGTCTCTCCCTTGCTTTTCGTGCTTTGCATAGCTTTCTGCAGGCTCCTAACGATCGCTGTGTGTAGGAATCGAGATCGAGTTAACGAAGCTGAAGAATACTCATGGTTGGGATTGATGAGCATGCTAGGAATGGCGGGTTGATTCTAAGAACCATCCATATGCTAATTTGAGATATTTCGGAAATTTGCTCGGATTTCGGATTTCCTTTTTCACAGTTCCCAGTTGTGTGGGAAGATCCATCAATACCGGATAAGAGAAGATGGCCTCTGCTTTGGGCAGTATGACAGCAATTGCCACGTCTACCTCATTGGGCAACATTGGAAAGGAGAAGAAGTTGGGTGCAGTCTTTGATAGTTATGGCAGACAATTGTCTTCTCTTTCAGTTTTTTC…	163	T	C
isotig02639	TTTCTATATGTCTCTCCCTTGCTTTTCGTGCTTTGCATAGCTTTCTGCAGGCTCCTAACGATCGCTGTGTGTAGGAATCGAGATCGAGTTAACGAAGCTGAAGAATACTCATGGTTGGGATTGATGAGCATGCTAGGAATGGCGGGTTGATTCTAAGAACCATCCATATGCTAATTTGAGATATTTCGGAAATTTGCTCGGATTTCGGATTTCCTTTTTCACAGTTCCCAGTTGTGTGGGAAGATCCATCAATACCGGATAAGAGAAGATGGCCTCTGCTTTGGGCAGTATGACAGCAATTGCCACGTCTACCTCATTGGGCAACATTGGAAAGGAGAAGAAGTTGGGTGCAGTCTTTGATAGTTATGGCAGACAATTGTCTTCTCTTTCAGTTTTTTC…	221	A	G
isotig02639	TTTCTATATGTCTCTCCCTTGCTTTTCGTGCTTTGCATAGCTTTCTGCAGGCTCCTAACGATCGCTGTGTGTAGGAATCGAGATCGAGTTAACGAAGCTGAAGAATACTCATGGTTGGGATTGATGAGCATGCTAGGAATGGCGGGTTGATTCTAAGAACCATCCATATGCTAATTTGAGATATTTCGGAAATTTGCTCGGATTTCGGATTTCCTTTTTCACAGTTCCCAGTTGTGTGGGAAGATCCATCAATACCGGATAAGAGAAGATGGCCTCTGCTTTGGGCAGTATGACAGCAATTGCCACGTCTACCTCATTGGGCAACATTGGAAAGGAGAAGAAGTTGGGTGCAGTCTTTGATAGTTATGGCAGACAATTGTCTTCTCTTTCAGTTTTTTC…	235	T	G
isotig02639	TTTCTATATGTCTCTCCCTTGCTTTTCGTGCTTTGCATAGCTTTCTGCAGGCTCCTAACGATCGCTGTGTGTAGGAATCGAGATCGAGTTAACGAAGCTGAAGAATACTCATGGTTGGGATTGATGAGCATGCTAGGAATGGCGGGTTGATTCTAAGAACCATCCATATGCTAATTTGAGATATTTCGGAAATTTGCTCGGATTTCGGATTTCCTTTTTCACAGTTCCCAGTTGTGTGGGAAGATCCATCAATACCGGATAAGAGAAGATGGCCTCTGCTTTGGGCAGTATGACAGCAATTGCCACGTCTACCTCATTGGGCAACATTGGAAAGGAGAAGAAGTTGGGTGCAGTCTTTGATAGTTATGGCAGACAATTGTCTTCTCTTTCAGTTTTTTC…	323	A	C
isotig02639	TTTCTATATGTCTCTCCCTTGCTTTTCGTGCTTTGCATAGCTTTCTGCAGGCTCCTAACGATCGCTGTGTGTAGGAATCGAGATCGAGTTAACGAAGCTGAAGAATACTCATGGTTGGGATTGATGAGCATGCTAGGAATGGCGGGTTGATTCTAAGAACCATCCATATGCTAATTTGAGATATTTCGGAAATTTGCTCGGATTTCGGATTTCCTTTTTCACAGTTCCCAGTTGTGTGGGAAGATCCATCAATACCGGATAAGAGAAGATGGCCTCTGCTTTGGGCAGTATGACAGCAATTGCCACGTCTACCTCATTGGGCAACATTGGAAAGGAGAAGAAGTTGGGTGCAGTCTTTGATAGTTATGGCAGACAATTGTCTTCTCTTTCAGTTTTTTC…	404	A	G
isotig02639	TTTCTATATGTCTCTCCCTTGCTTTTCGTGCTTTGCATAGCTTTCTGCAGGCTCCTAACGATCGCTGTGTGTAGGAATCGAGATCGAGTTAACGAAGCTGAAGAATACTCATGGTTGGGATTGATGAGCATGCTAGGAATGGCGGGTTGATTCTAAGAACCATCCATATGCTAATTTGAGATATTTCGGAAATTTGCTCGGATTTCGGATTTCCTTTTTCACAGTTCCCAGTTGTGTGGGAAGATCCATCAATACCGGATAAGAGAAGATGGCCTCTGCTTTGGGCAGTATGACAGCAATTGCCACGTCTACCTCATTGGGCAACATTGGAAAGGAGAAGAAGTTGGGTGCAGTCTTTGATAGTTATGGCAGACAATTGTCTTCTCTTTCAGTTTTTTC…	409	C	T
isotig02639	TTTCTATATGTCTCTCCCTTGCTTTTCGTGCTTTGCATAGCTTTCTGCAGGCTCCTAACGATCGCTGTGTGTAGGAATCGAGATCGAGTTAACGAAGCTGAAGAATACTCATGGTTGGGATTGATGAGCATGCTAGGAATGGCGGGTTGATTCTAAGAACCATCCATATGCTAATTTGAGATATTTCGGAAATTTGCTCGGATTTCGGATTTCCTTTTTCACAGTTCCCAGTTGTGTGGGAAGATCCATCAATACCGGATAAGAGAAGATGGCCTCTGCTTTGGGCAGTATGACAGCAATTGCCACGTCTACCTCATTGGGCAACATTGGAAAGGAGAAGAAGTTGGGTGCAGTCTTTGATAGTTATGGCAGACAATTGTCTTCTCTTTCAGTTTTTTC…	1015	A	G
isotig02639	TTTCTATATGTCTCTCCCTTGCTTTTCGTGCTTTGCATAGCTTTCTGCAGGCTCCTAACGATCGCTGTGTGTAGGAATCGAGATCGAGTTAACGAAGCTGAAGAATACTCATGGTTGGGATTGATGAGCATGCTAGGAATGGCGGGTTGATTCTAAGAACCATCCATATGCTAATTTGAGATATTTCGGAAATTTGCTCGGATTTCGGATTTCCTTTTTCACAGTTCCCAGTTGTGTGGGAAGATCCATCAATACCGGATAAGAGAAGATGGCCTCTGCTTTGGGCAGTATGACAGCAATTGCCACGTCTACCTCATTGGGCAACATTGGAAAGGAGAAGAAGTTGGGTGCAGTCTTTGATAGTTATGGCAGACAATTGTCTTCTCTTTCAGTTTTTTC…	1018	A	G
isotig02639	TTTCTATATGTCTCTCCCTTGCTTTTCGTGCTTTGCATAGCTTTCTGCAGGCTCCTAACGATCGCTGTGTGTAGGAATCGAGATCGAGTTAACGAAGCTGAAGAATACTCATGGTTGGGATTGATGAGCATGCTAGGAATGGCGGGTTGATTCTAAGAACCATCCATATGCTAATTTGAGATATTTCGGAAATTTGCTCGGATTTCGGATTTCCTTTTTCACAGTTCCCAGTTGTGTGGGAAGATCCATCAATACCGGATAAGAGAAGATGGCCTCTGCTTTGGGCAGTATGACAGCAATTGCCACGTCTACCTCATTGGGCAACATTGGAAAGGAGAAGAAGTTGGGTGCAGTCTTTGATAGTTATGGCAGACAATTGTCTTCTCTTTCAGTTTTTTC…	1033	T	C
isotig02639	TTTCTATATGTCTCTCCCTTGCTTTTCGTGCTTTGCATAGCTTTCTGCAGGCTCCTAACGATCGCTGTGTGTAGGAATCGAGATCGAGTTAACGAAGCTGAAGAATACTCATGGTTGGGATTGATGAGCATGCTAGGAATGGCGGGTTGATTCTAAGAACCATCCATATGCTAATTTGAGATATTTCGGAAATTTGCTCGGATTTCGGATTTCCTTTTTCACAGTTCCCAGTTGTGTGGGAAGATCCATCAATACCGGATAAGAGAAGATGGCCTCTGCTTTGGGCAGTATGACAGCAATTGCCACGTCTACCTCATTGGGCAACATTGGAAAGGAGAAGAAGTTGGGTGCAGTCTTTGATAGTTATGGCAGACAATTGTCTTCTCTTTCAGTTTTTTC…	1034	A	T
isotig02639	TTTCTATATGTCTCTCCCTTGCTTTTCGTGCTTTGCATAGCTTTCTGCAGGCTCCTAACGATCGCTGTGTGTAGGAATCGAGATCGAGTTAACGAAGCTGAAGAATACTCATGGTTGGGATTGATGAGCATGCTAGGAATGGCGGGTTGATTCTAAGAACCATCCATATGCTAATTTGAGATATTTCGGAAATTTGCTCGGATTTCGGATTTCCTTTTTCACAGTTCCCAGTTGTGTGGGAAGATCCATCAATACCGGATAAGAGAAGATGGCCTCTGCTTTGGGCAGTATGACAGCAATTGCCACGTCTACCTCATTGGGCAACATTGGAAAGGAGAAGAAGTTGGGTGCAGTCTTTGATAGTTATGGCAGACAATTGTCTTCTCTTTCAGTTTTTTC…	1060	G	A
isotig02639	TTTCTATATGTCTCTCCCTTGCTTTTCGTGCTTTGCATAGCTTTCTGCAGGCTCCTAACGATCGCTGTGTGTAGGAATCGAGATCGAGTTAACGAAGCTGAAGAATACTCATGGTTGGGATTGATGAGCATGCTAGGAATGGCGGGTTGATTCTAAGAACCATCCATATGCTAATTTGAGATATTTCGGAAATTTGCTCGGATTTCGGATTTCCTTTTTCACAGTTCCCAGTTGTGTGGGAAGATCCATCAATACCGGATAAGAGAAGATGGCCTCTGCTTTGGGCAGTATGACAGCAATTGCCACGTCTACCTCATTGGGCAACATTGGAAAGGAGAAGAAGTTGGGTGCAGTCTTTGATAGTTATGGCAGACAATTGTCTTCTCTTTCAGTTTTTTC…	1072	G	A
isotig02639	TTTCTATATGTCTCTCCCTTGCTTTTCGTGCTTTGCATAGCTTTCTGCAGGCTCCTAACGATCGCTGTGTGTAGGAATCGAGATCGAGTTAACGAAGCTGAAGAATACTCATGGTTGGGATTGATGAGCATGCTAGGAATGGCGGGTTGATTCTAAGAACCATCCATATGCTAATTTGAGATATTTCGGAAATTTGCTCGGATTTCGGATTTCCTTTTTCACAGTTCCCAGTTGTGTGGGAAGATCCATCAATACCGGATAAGAGAAGATGGCCTCTGCTTTGGGCAGTATGACAGCAATTGCCACGTCTACCTCATTGGGCAACATTGGAAAGGAGAAGAAGTTGGGTGCAGTCTTTGATAGTTATGGCAGACAATTGTCTTCTCTTTCAGTTTTTTC…	1114	T	C
isotig02639	TTTCTATATGTCTCTCCCTTGCTTTTCGTGCTTTGCATAGCTTTCTGCAGGCTCCTAACGATCGCTGTGTGTAGGAATCGAGATCGAGTTAACGAAGCTGAAGAATACTCATGGTTGGGATTGATGAGCATGCTAGGAATGGCGGGTTGATTCTAAGAACCATCCATATGCTAATTTGAGATATTTCGGAAATTTGCTCGGATTTCGGATTTCCTTTTTCACAGTTCCCAGTTGTGTGGGAAGATCCATCAATACCGGATAAGAGAAGATGGCCTCTGCTTTGGGCAGTATGACAGCAATTGCCACGTCTACCTCATTGGGCAACATTGGAAAGGAGAAGAAGTTGGGTGCAGTCTTTGATAGTTATGGCAGACAATTGTCTTCTCTTTCAGTTTTTTC…	1117	G	A
isotig02639	TTTCTATATGTCTCTCCCTTGCTTTTCGTGCTTTGCATAGCTTTCTGCAGGCTCCTAACGATCGCTGTGTGTAGGAATCGAGATCGAGTTAACGAAGCTGAAGAATACTCATGGTTGGGATTGATGAGCATGCTAGGAATGGCGGGTTGATTCTAAGAACCATCCATATGCTAATTTGAGATATTTCGGAAATTTGCTCGGATTTCGGATTTCCTTTTTCACAGTTCCCAGTTGTGTGGGAAGATCCATCAATACCGGATAAGAGAAGATGGCCTCTGCTTTGGGCAGTATGACAGCAATTGCCACGTCTACCTCATTGGGCAACATTGGAAAGGAGAAGAAGTTGGGTGCAGTCTTTGATAGTTATGGCAGACAATTGTCTTCTCTTTCAGTTTTTTC…	1273	C	T
isotig02639	TTTCTATATGTCTCTCCCTTGCTTTTCGTGCTTTGCATAGCTTTCTGCAGGCTCCTAACGATCGCTGTGTGTAGGAATCGAGATCGAGTTAACGAAGCTGAAGAATACTCATGGTTGGGATTGATGAGCATGCTAGGAATGGCGGGTTGATTCTAAGAACCATCCATATGCTAATTTGAGATATTTCGGAAATTTGCTCGGATTTCGGATTTCCTTTTTCACAGTTCCCAGTTGTGTGGGAAGATCCATCAATACCGGATAAGAGAAGATGGCCTCTGCTTTGGGCAGTATGACAGCAATTGCCACGTCTACCTCATTGGGCAACATTGGAAAGGAGAAGAAGTTGGGTGCAGTCTTTGATAGTTATGGCAGACAATTGTCTTCTCTTTCAGTTTTTTC…	1288	A	G
isotig02639	TTTCTATATGTCTCTCCCTTGCTTTTCGTGCTTTGCATAGCTTTCTGCAGGCTCCTAACGATCGCTGTGTGTAGGAATCGAGATCGAGTTAACGAAGCTGAAGAATACTCATGGTTGGGATTGATGAGCATGCTAGGAATGGCGGGTTGATTCTAAGAACCATCCATATGCTAATTTGAGATATTTCGGAAATTTGCTCGGATTTCGGATTTCCTTTTTCACAGTTCCCAGTTGTGTGGGAAGATCCATCAATACCGGATAAGAGAAGATGGCCTCTGCTTTGGGCAGTATGACAGCAATTGCCACGTCTACCTCATTGGGCAACATTGGAAAGGAGAAGAAGTTGGGTGCAGTCTTTGATAGTTATGGCAGACAATTGTCTTCTCTTTCAGTTTTTTC…	1613	T	A
isotig02639	TTTCTATATGTCTCTCCCTTGCTTTTCGTGCTTTGCATAGCTTTCTGCAGGCTCCTAACGATCGCTGTGTGTAGGAATCGAGATCGAGTTAACGAAGCTGAAGAATACTCATGGTTGGGATTGATGAGCATGCTAGGAATGGCGGGTTGATTCTAAGAACCATCCATATGCTAATTTGAGATATTTCGGAAATTTGCTCGGATTTCGGATTTCCTTTTTCACAGTTCCCAGTTGTGTGGGAAGATCCATCAATACCGGATAAGAGAAGATGGCCTCTGCTTTGGGCAGTATGACAGCAATTGCCACGTCTACCTCATTGGGCAACATTGGAAAGGAGAAGAAGTTGGGTGCAGTCTTTGATAGTTATGGCAGACAATTGTCTTCTCTTTCAGTTTTTTC…	1664	G	A
isotig02639	TTTCTATATGTCTCTCCCTTGCTTTTCGTGCTTTGCATAGCTTTCTGCAGGCTCCTAACGATCGCTGTGTGTAGGAATCGAGATCGAGTTAACGAAGCTGAAGAATACTCATGGTTGGGATTGATGAGCATGCTAGGAATGGCGGGTTGATTCTAAGAACCATCCATATGCTAATTTGAGATATTTCGGAAATTTGCTCGGATTTCGGATTTCCTTTTTCACAGTTCCCAGTTGTGTGGGAAGATCCATCAATACCGGATAAGAGAAGATGGCCTCTGCTTTGGGCAGTATGACAGCAATTGCCACGTCTACCTCATTGGGCAACATTGGAAAGGAGAAGAAGTTGGGTGCAGTCTTTGATAGTTATGGCAGACAATTGTCTTCTCTTTCAGTTTTTTC…	1670	G	A
isotig02639	TTTCTATATGTCTCTCCCTTGCTTTTCGTGCTTTGCATAGCTTTCTGCAGGCTCCTAACGATCGCTGTGTGTAGGAATCGAGATCGAGTTAACGAAGCTGAAGAATACTCATGGTTGGGATTGATGAGCATGCTAGGAATGGCGGGTTGATTCTAAGAACCATCCATATGCTAATTTGAGATATTTCGGAAATTTGCTCGGATTTCGGATTTCCTTTTTCACAGTTCCCAGTTGTGTGGGAAGATCCATCAATACCGGATAAGAGAAGATGGCCTCTGCTTTGGGCAGTATGACAGCAATTGCCACGTCTACCTCATTGGGCAACATTGGAAAGGAGAAGAAGTTGGGTGCAGTCTTTGATAGTTATGGCAGACAATTGTCTTCTCTTTCAGTTTTTTC…	2030	C	T
isotig02639	TTTCTATATGTCTCTCCCTTGCTTTTCGTGCTTTGCATAGCTTTCTGCAGGCTCCTAACGATCGCTGTGTGTAGGAATCGAGATCGAGTTAACGAAGCTGAAGAATACTCATGGTTGGGATTGATGAGCATGCTAGGAATGGCGGGTTGATTCTAAGAACCATCCATATGCTAATTTGAGATATTTCGGAAATTTGCTCGGATTTCGGATTTCCTTTTTCACAGTTCCCAGTTGTGTGGGAAGATCCATCAATACCGGATAAGAGAAGATGGCCTCTGCTTTGGGCAGTATGACAGCAATTGCCACGTCTACCTCATTGGGCAACATTGGAAAGGAGAAGAAGTTGGGTGCAGTCTTTGATAGTTATGGCAGACAATTGTCTTCTCTTTCAGTTTTTTC…	2051	C	T
isotig02639	TTTCTATATGTCTCTCCCTTGCTTTTCGTGCTTTGCATAGCTTTCTGCAGGCTCCTAACGATCGCTGTGTGTAGGAATCGAGATCGAGTTAACGAAGCTGAAGAATACTCATGGTTGGGATTGATGAGCATGCTAGGAATGGCGGGTTGATTCTAAGAACCATCCATATGCTAATTTGAGATATTTCGGAAATTTGCTCGGATTTCGGATTTCCTTTTTCACAGTTCCCAGTTGTGTGGGAAGATCCATCAATACCGGATAAGAGAAGATGGCCTCTGCTTTGGGCAGTATGACAGCAATTGCCACGTCTACCTCATTGGGCAACATTGGAAAGGAGAAGAAGTTGGGTGCAGTCTTTGATAGTTATGGCAGACAATTGTCTTCTCTTTCAGTTTTTTC…	2123	A	G
isotig02639	TTTCTATATGTCTCTCCCTTGCTTTTCGTGCTTTGCATAGCTTTCTGCAGGCTCCTAACGATCGCTGTGTGTAGGAATCGAGATCGAGTTAACGAAGCTGAAGAATACTCATGGTTGGGATTGATGAGCATGCTAGGAATGGCGGGTTGATTCTAAGAACCATCCATATGCTAATTTGAGATATTTCGGAAATTTGCTCGGATTTCGGATTTCCTTTTTCACAGTTCCCAGTTGTGTGGGAAGATCCATCAATACCGGATAAGAGAAGATGGCCTCTGCTTTGGGCAGTATGACAGCAATTGCCACGTCTACCTCATTGGGCAACATTGGAAAGGAGAAGAAGTTGGGTGCAGTCTTTGATAGTTATGGCAGACAATTGTCTTCTCTTTCAGTTTTTTC…	2387	A	G
isotig02639	TTTCTATATGTCTCTCCCTTGCTTTTCGTGCTTTGCATAGCTTTCTGCAGGCTCCTAACGATCGCTGTGTGTAGGAATCGAGATCGAGTTAACGAAGCTGAAGAATACTCATGGTTGGGATTGATGAGCATGCTAGGAATGGCGGGTTGATTCTAAGAACCATCCATATGCTAATTTGAGATATTTCGGAAATTTGCTCGGATTTCGGATTTCCTTTTTCACAGTTCCCAGTTGTGTGGGAAGATCCATCAATACCGGATAAGAGAAGATGGCCTCTGCTTTGGGCAGTATGACAGCAATTGCCACGTCTACCTCATTGGGCAACATTGGAAAGGAGAAGAAGTTGGGTGCAGTCTTTGATAGTTATGGCAGACAATTGTCTTCTCTTTCAGTTTTTTC…	2431	T	C
isotig02639	TTTCTATATGTCTCTCCCTTGCTTTTCGTGCTTTGCATAGCTTTCTGCAGGCTCCTAACGATCGCTGTGTGTAGGAATCGAGATCGAGTTAACGAAGCTGAAGAATACTCATGGTTGGGATTGATGAGCATGCTAGGAATGGCGGGTTGATTCTAAGAACCATCCATATGCTAATTTGAGATATTTCGGAAATTTGCTCGGATTTCGGATTTCCTTTTTCACAGTTCCCAGTTGTGTGGGAAGATCCATCAATACCGGATAAGAGAAGATGGCCTCTGCTTTGGGCAGTATGACAGCAATTGCCACGTCTACCTCATTGGGCAACATTGGAAAGGAGAAGAAGTTGGGTGCAGTCTTTGATAGTTATGGCAGACAATTGTCTTCTCTTTCAGTTTTTTC…	2682	G	C
isotig02639	TTTCTATATGTCTCTCCCTTGCTTTTCGTGCTTTGCATAGCTTTCTGCAGGCTCCTAACGATCGCTGTGTGTAGGAATCGAGATCGAGTTAACGAAGCTGAAGAATACTCATGGTTGGGATTGATGAGCATGCTAGGAATGGCGGGTTGATTCTAAGAACCATCCATATGCTAATTTGAGATATTTCGGAAATTTGCTCGGATTTCGGATTTCCTTTTTCACAGTTCCCAGTTGTGTGGGAAGATCCATCAATACCGGATAAGAGAAGATGGCCTCTGCTTTGGGCAGTATGACAGCAATTGCCACGTCTACCTCATTGGGCAACATTGGAAAGGAGAAGAAGTTGGGTGCAGTCTTTGATAGTTATGGCAGACAATTGTCTTCTCTTTCAGTTTTTTC…	2705	G	T
isotig02677	TTGCGACAAAGTTTTGAACTGGATCAACCTCTATGTCCATCAAGATTATTACAGAAAATTCAAAATGATAATCAACAAATAAAAATAGCTAGCAAGACAGCATCATGCAACCGCTGCATGAGGAGACTAGCACCTGCTTAACACTCATTTTTAAGGTGTCTTCCTAGAAAAGGAAGTGAATTTACACAAAAATAAGTAATGCTAATAATAATACCCTAACGGTAGTTCTGGTCCAATACACTCTGGCATTCGAATCCCATTATTATCCCCCCTTATCAAAGTCGTTATGTAAAATTACTTCCATTCCTCCAAAGAGCTTTTTCATAGTTGTTTCATTCTACATTATGAGAATTTCACGTGTTTTGTCAGGCTAGAATATTCAACTGTTACAATGGCTTA…	251	C	T
isotig02677	TTGCGACAAAGTTTTGAACTGGATCAACCTCTATGTCCATCAAGATTATTACAGAAAATTCAAAATGATAATCAACAAATAAAAATAGCTAGCAAGACAGCATCATGCAACCGCTGCATGAGGAGACTAGCACCTGCTTAACACTCATTTTTAAGGTGTCTTCCTAGAAAAGGAAGTGAATTTACACAAAAATAAGTAATGCTAATAATAATACCCTAACGGTAGTTCTGGTCCAATACACTCTGGCATTCGAATCCCATTATTATCCCCCCTTATCAAAGTCGTTATGTAAAATTACTTCCATTCCTCCAAAGAGCTTTTTCATAGTTGTTTCATTCTACATTATGAGAATTTCACGTGTTTTGTCAGGCTAGAATATTCAACTGTTACAATGGCTTA…	276	T	G
isotig02677	TTGCGACAAAGTTTTGAACTGGATCAACCTCTATGTCCATCAAGATTATTACAGAAAATTCAAAATGATAATCAACAAATAAAAATAGCTAGCAAGACAGCATCATGCAACCGCTGCATGAGGAGACTAGCACCTGCTTAACACTCATTTTTAAGGTGTCTTCCTAGAAAAGGAAGTGAATTTACACAAAAATAAGTAATGCTAATAATAATACCCTAACGGTAGTTCTGGTCCAATACACTCTGGCATTCGAATCCCATTATTATCCCCCCTTATCAAAGTCGTTATGTAAAATTACTTCCATTCCTCCAAAGAGCTTTTTCATAGTTGTTTCATTCTACATTATGAGAATTTCACGTGTTTTGTCAGGCTAGAATATTCAACTGTTACAATGGCTTA…	287	A	G
isotig02677	TTGCGACAAAGTTTTGAACTGGATCAACCTCTATGTCCATCAAGATTATTACAGAAAATTCAAAATGATAATCAACAAATAAAAATAGCTAGCAAGACAGCATCATGCAACCGCTGCATGAGGAGACTAGCACCTGCTTAACACTCATTTTTAAGGTGTCTTCCTAGAAAAGGAAGTGAATTTACACAAAAATAAGTAATGCTAATAATAATACCCTAACGGTAGTTCTGGTCCAATACACTCTGGCATTCGAATCCCATTATTATCCCCCCTTATCAAAGTCGTTATGTAAAATTACTTCCATTCCTCCAAAGAGCTTTTTCATAGTTGTTTCATTCTACATTATGAGAATTTCACGTGTTTTGTCAGGCTAGAATATTCAACTGTTACAATGGCTTA…	295	T	A
isotig02677	TTGCGACAAAGTTTTGAACTGGATCAACCTCTATGTCCATCAAGATTATTACAGAAAATTCAAAATGATAATCAACAAATAAAAATAGCTAGCAAGACAGCATCATGCAACCGCTGCATGAGGAGACTAGCACCTGCTTAACACTCATTTTTAAGGTGTCTTCCTAGAAAAGGAAGTGAATTTACACAAAAATAAGTAATGCTAATAATAATACCCTAACGGTAGTTCTGGTCCAATACACTCTGGCATTCGAATCCCATTATTATCCCCCCTTATCAAAGTCGTTATGTAAAATTACTTCCATTCCTCCAAAGAGCTTTTTCATAGTTGTTTCATTCTACATTATGAGAATTTCACGTGTTTTGTCAGGCTAGAATATTCAACTGTTACAATGGCTTA…	301	C	T
isotig02677	TTGCGACAAAGTTTTGAACTGGATCAACCTCTATGTCCATCAAGATTATTACAGAAAATTCAAAATGATAATCAACAAATAAAAATAGCTAGCAAGACAGCATCATGCAACCGCTGCATGAGGAGACTAGCACCTGCTTAACACTCATTTTTAAGGTGTCTTCCTAGAAAAGGAAGTGAATTTACACAAAAATAAGTAATGCTAATAATAATACCCTAACGGTAGTTCTGGTCCAATACACTCTGGCATTCGAATCCCATTATTATCCCCCCTTATCAAAGTCGTTATGTAAAATTACTTCCATTCCTCCAAAGAGCTTTTTCATAGTTGTTTCATTCTACATTATGAGAATTTCACGTGTTTTGTCAGGCTAGAATATTCAACTGTTACAATGGCTTA…	322	T	G
isotig02677	TTGCGACAAAGTTTTGAACTGGATCAACCTCTATGTCCATCAAGATTATTACAGAAAATTCAAAATGATAATCAACAAATAAAAATAGCTAGCAAGACAGCATCATGCAACCGCTGCATGAGGAGACTAGCACCTGCTTAACACTCATTTTTAAGGTGTCTTCCTAGAAAAGGAAGTGAATTTACACAAAAATAAGTAATGCTAATAATAATACCCTAACGGTAGTTCTGGTCCAATACACTCTGGCATTCGAATCCCATTATTATCCCCCCTTATCAAAGTCGTTATGTAAAATTACTTCCATTCCTCCAAAGAGCTTTTTCATAGTTGTTTCATTCTACATTATGAGAATTTCACGTGTTTTGTCAGGCTAGAATATTCAACTGTTACAATGGCTTA…	399	A	T
isotig02677	TTGCGACAAAGTTTTGAACTGGATCAACCTCTATGTCCATCAAGATTATTACAGAAAATTCAAAATGATAATCAACAAATAAAAATAGCTAGCAAGACAGCATCATGCAACCGCTGCATGAGGAGACTAGCACCTGCTTAACACTCATTTTTAAGGTGTCTTCCTAGAAAAGGAAGTGAATTTACACAAAAATAAGTAATGCTAATAATAATACCCTAACGGTAGTTCTGGTCCAATACACTCTGGCATTCGAATCCCATTATTATCCCCCCTTATCAAAGTCGTTATGTAAAATTACTTCCATTCCTCCAAAGAGCTTTTTCATAGTTGTTTCATTCTACATTATGAGAATTTCACGTGTTTTGTCAGGCTAGAATATTCAACTGTTACAATGGCTTA…	418	A	G
isotig02677	TTGCGACAAAGTTTTGAACTGGATCAACCTCTATGTCCATCAAGATTATTACAGAAAATTCAAAATGATAATCAACAAATAAAAATAGCTAGCAAGACAGCATCATGCAACCGCTGCATGAGGAGACTAGCACCTGCTTAACACTCATTTTTAAGGTGTCTTCCTAGAAAAGGAAGTGAATTTACACAAAAATAAGTAATGCTAATAATAATACCCTAACGGTAGTTCTGGTCCAATACACTCTGGCATTCGAATCCCATTATTATCCCCCCTTATCAAAGTCGTTATGTAAAATTACTTCCATTCCTCCAAAGAGCTTTTTCATAGTTGTTTCATTCTACATTATGAGAATTTCACGTGTTTTGTCAGGCTAGAATATTCAACTGTTACAATGGCTTA…	419	C	T
isotig02677	TTGCGACAAAGTTTTGAACTGGATCAACCTCTATGTCCATCAAGATTATTACAGAAAATTCAAAATGATAATCAACAAATAAAAATAGCTAGCAAGACAGCATCATGCAACCGCTGCATGAGGAGACTAGCACCTGCTTAACACTCATTTTTAAGGTGTCTTCCTAGAAAAGGAAGTGAATTTACACAAAAATAAGTAATGCTAATAATAATACCCTAACGGTAGTTCTGGTCCAATACACTCTGGCATTCGAATCCCATTATTATCCCCCCTTATCAAAGTCGTTATGTAAAATTACTTCCATTCCTCCAAAGAGCTTTTTCATAGTTGTTTCATTCTACATTATGAGAATTTCACGTGTTTTGTCAGGCTAGAATATTCAACTGTTACAATGGCTTA…	434	G	T
isotig02677	TTGCGACAAAGTTTTGAACTGGATCAACCTCTATGTCCATCAAGATTATTACAGAAAATTCAAAATGATAATCAACAAATAAAAATAGCTAGCAAGACAGCATCATGCAACCGCTGCATGAGGAGACTAGCACCTGCTTAACACTCATTTTTAAGGTGTCTTCCTAGAAAAGGAAGTGAATTTACACAAAAATAAGTAATGCTAATAATAATACCCTAACGGTAGTTCTGGTCCAATACACTCTGGCATTCGAATCCCATTATTATCCCCCCTTATCAAAGTCGTTATGTAAAATTACTTCCATTCCTCCAAAGAGCTTTTTCATAGTTGTTTCATTCTACATTATGAGAATTTCACGTGTTTTGTCAGGCTAGAATATTCAACTGTTACAATGGCTTA…	447	G	A
isotig02677	TTGCGACAAAGTTTTGAACTGGATCAACCTCTATGTCCATCAAGATTATTACAGAAAATTCAAAATGATAATCAACAAATAAAAATAGCTAGCAAGACAGCATCATGCAACCGCTGCATGAGGAGACTAGCACCTGCTTAACACTCATTTTTAAGGTGTCTTCCTAGAAAAGGAAGTGAATTTACACAAAAATAAGTAATGCTAATAATAATACCCTAACGGTAGTTCTGGTCCAATACACTCTGGCATTCGAATCCCATTATTATCCCCCCTTATCAAAGTCGTTATGTAAAATTACTTCCATTCCTCCAAAGAGCTTTTTCATAGTTGTTTCATTCTACATTATGAGAATTTCACGTGTTTTGTCAGGCTAGAATATTCAACTGTTACAATGGCTTA…	456	A	T
isotig02677	TTGCGACAAAGTTTTGAACTGGATCAACCTCTATGTCCATCAAGATTATTACAGAAAATTCAAAATGATAATCAACAAATAAAAATAGCTAGCAAGACAGCATCATGCAACCGCTGCATGAGGAGACTAGCACCTGCTTAACACTCATTTTTAAGGTGTCTTCCTAGAAAAGGAAGTGAATTTACACAAAAATAAGTAATGCTAATAATAATACCCTAACGGTAGTTCTGGTCCAATACACTCTGGCATTCGAATCCCATTATTATCCCCCCTTATCAAAGTCGTTATGTAAAATTACTTCCATTCCTCCAAAGAGCTTTTTCATAGTTGTTTCATTCTACATTATGAGAATTTCACGTGTTTTGTCAGGCTAGAATATTCAACTGTTACAATGGCTTA…	470	G	T
isotig02677	TTGCGACAAAGTTTTGAACTGGATCAACCTCTATGTCCATCAAGATTATTACAGAAAATTCAAAATGATAATCAACAAATAAAAATAGCTAGCAAGACAGCATCATGCAACCGCTGCATGAGGAGACTAGCACCTGCTTAACACTCATTTTTAAGGTGTCTTCCTAGAAAAGGAAGTGAATTTACACAAAAATAAGTAATGCTAATAATAATACCCTAACGGTAGTTCTGGTCCAATACACTCTGGCATTCGAATCCCATTATTATCCCCCCTTATCAAAGTCGTTATGTAAAATTACTTCCATTCCTCCAAAGAGCTTTTTCATAGTTGTTTCATTCTACATTATGAGAATTTCACGTGTTTTGTCAGGCTAGAATATTCAACTGTTACAATGGCTTA…	476	T	A
isotig02677	TTGCGACAAAGTTTTGAACTGGATCAACCTCTATGTCCATCAAGATTATTACAGAAAATTCAAAATGATAATCAACAAATAAAAATAGCTAGCAAGACAGCATCATGCAACCGCTGCATGAGGAGACTAGCACCTGCTTAACACTCATTTTTAAGGTGTCTTCCTAGAAAAGGAAGTGAATTTACACAAAAATAAGTAATGCTAATAATAATACCCTAACGGTAGTTCTGGTCCAATACACTCTGGCATTCGAATCCCATTATTATCCCCCCTTATCAAAGTCGTTATGTAAAATTACTTCCATTCCTCCAAAGAGCTTTTTCATAGTTGTTTCATTCTACATTATGAGAATTTCACGTGTTTTGTCAGGCTAGAATATTCAACTGTTACAATGGCTTA…	502	A	G
isotig02677	TTGCGACAAAGTTTTGAACTGGATCAACCTCTATGTCCATCAAGATTATTACAGAAAATTCAAAATGATAATCAACAAATAAAAATAGCTAGCAAGACAGCATCATGCAACCGCTGCATGAGGAGACTAGCACCTGCTTAACACTCATTTTTAAGGTGTCTTCCTAGAAAAGGAAGTGAATTTACACAAAAATAAGTAATGCTAATAATAATACCCTAACGGTAGTTCTGGTCCAATACACTCTGGCATTCGAATCCCATTATTATCCCCCCTTATCAAAGTCGTTATGTAAAATTACTTCCATTCCTCCAAAGAGCTTTTTCATAGTTGTTTCATTCTACATTATGAGAATTTCACGTGTTTTGTCAGGCTAGAATATTCAACTGTTACAATGGCTTA…	516	G	C
isotig02677	TTGCGACAAAGTTTTGAACTGGATCAACCTCTATGTCCATCAAGATTATTACAGAAAATTCAAAATGATAATCAACAAATAAAAATAGCTAGCAAGACAGCATCATGCAACCGCTGCATGAGGAGACTAGCACCTGCTTAACACTCATTTTTAAGGTGTCTTCCTAGAAAAGGAAGTGAATTTACACAAAAATAAGTAATGCTAATAATAATACCCTAACGGTAGTTCTGGTCCAATACACTCTGGCATTCGAATCCCATTATTATCCCCCCTTATCAAAGTCGTTATGTAAAATTACTTCCATTCCTCCAAAGAGCTTTTTCATAGTTGTTTCATTCTACATTATGAGAATTTCACGTGTTTTGTCAGGCTAGAATATTCAACTGTTACAATGGCTTA…	588	A	G
isotig02677	TTGCGACAAAGTTTTGAACTGGATCAACCTCTATGTCCATCAAGATTATTACAGAAAATTCAAAATGATAATCAACAAATAAAAATAGCTAGCAAGACAGCATCATGCAACCGCTGCATGAGGAGACTAGCACCTGCTTAACACTCATTTTTAAGGTGTCTTCCTAGAAAAGGAAGTGAATTTACACAAAAATAAGTAATGCTAATAATAATACCCTAACGGTAGTTCTGGTCCAATACACTCTGGCATTCGAATCCCATTATTATCCCCCCTTATCAAAGTCGTTATGTAAAATTACTTCCATTCCTCCAAAGAGCTTTTTCATAGTTGTTTCATTCTACATTATGAGAATTTCACGTGTTTTGTCAGGCTAGAATATTCAACTGTTACAATGGCTTA…	620	G	A
isotig02677	TTGCGACAAAGTTTTGAACTGGATCAACCTCTATGTCCATCAAGATTATTACAGAAAATTCAAAATGATAATCAACAAATAAAAATAGCTAGCAAGACAGCATCATGCAACCGCTGCATGAGGAGACTAGCACCTGCTTAACACTCATTTTTAAGGTGTCTTCCTAGAAAAGGAAGTGAATTTACACAAAAATAAGTAATGCTAATAATAATACCCTAACGGTAGTTCTGGTCCAATACACTCTGGCATTCGAATCCCATTATTATCCCCCCTTATCAAAGTCGTTATGTAAAATTACTTCCATTCCTCCAAAGAGCTTTTTCATAGTTGTTTCATTCTACATTATGAGAATTTCACGTGTTTTGTCAGGCTAGAATATTCAACTGTTACAATGGCTTA…	625	T	C
isotig02677	TTGCGACAAAGTTTTGAACTGGATCAACCTCTATGTCCATCAAGATTATTACAGAAAATTCAAAATGATAATCAACAAATAAAAATAGCTAGCAAGACAGCATCATGCAACCGCTGCATGAGGAGACTAGCACCTGCTTAACACTCATTTTTAAGGTGTCTTCCTAGAAAAGGAAGTGAATTTACACAAAAATAAGTAATGCTAATAATAATACCCTAACGGTAGTTCTGGTCCAATACACTCTGGCATTCGAATCCCATTATTATCCCCCCTTATCAAAGTCGTTATGTAAAATTACTTCCATTCCTCCAAAGAGCTTTTTCATAGTTGTTTCATTCTACATTATGAGAATTTCACGTGTTTTGTCAGGCTAGAATATTCAACTGTTACAATGGCTTA…	631	T	A
isotig02677	TTGCGACAAAGTTTTGAACTGGATCAACCTCTATGTCCATCAAGATTATTACAGAAAATTCAAAATGATAATCAACAAATAAAAATAGCTAGCAAGACAGCATCATGCAACCGCTGCATGAGGAGACTAGCACCTGCTTAACACTCATTTTTAAGGTGTCTTCCTAGAAAAGGAAGTGAATTTACACAAAAATAAGTAATGCTAATAATAATACCCTAACGGTAGTTCTGGTCCAATACACTCTGGCATTCGAATCCCATTATTATCCCCCCTTATCAAAGTCGTTATGTAAAATTACTTCCATTCCTCCAAAGAGCTTTTTCATAGTTGTTTCATTCTACATTATGAGAATTTCACGTGTTTTGTCAGGCTAGAATATTCAACTGTTACAATGGCTTA…	685	A	G
isotig02677	TTGCGACAAAGTTTTGAACTGGATCAACCTCTATGTCCATCAAGATTATTACAGAAAATTCAAAATGATAATCAACAAATAAAAATAGCTAGCAAGACAGCATCATGCAACCGCTGCATGAGGAGACTAGCACCTGCTTAACACTCATTTTTAAGGTGTCTTCCTAGAAAAGGAAGTGAATTTACACAAAAATAAGTAATGCTAATAATAATACCCTAACGGTAGTTCTGGTCCAATACACTCTGGCATTCGAATCCCATTATTATCCCCCCTTATCAAAGTCGTTATGTAAAATTACTTCCATTCCTCCAAAGAGCTTTTTCATAGTTGTTTCATTCTACATTATGAGAATTTCACGTGTTTTGTCAGGCTAGAATATTCAACTGTTACAATGGCTTA…	744	G	A
isotig02677	TTGCGACAAAGTTTTGAACTGGATCAACCTCTATGTCCATCAAGATTATTACAGAAAATTCAAAATGATAATCAACAAATAAAAATAGCTAGCAAGACAGCATCATGCAACCGCTGCATGAGGAGACTAGCACCTGCTTAACACTCATTTTTAAGGTGTCTTCCTAGAAAAGGAAGTGAATTTACACAAAAATAAGTAATGCTAATAATAATACCCTAACGGTAGTTCTGGTCCAATACACTCTGGCATTCGAATCCCATTATTATCCCCCCTTATCAAAGTCGTTATGTAAAATTACTTCCATTCCTCCAAAGAGCTTTTTCATAGTTGTTTCATTCTACATTATGAGAATTTCACGTGTTTTGTCAGGCTAGAATATTCAACTGTTACAATGGCTTA…	801	T	C
isotig02677	TTGCGACAAAGTTTTGAACTGGATCAACCTCTATGTCCATCAAGATTATTACAGAAAATTCAAAATGATAATCAACAAATAAAAATAGCTAGCAAGACAGCATCATGCAACCGCTGCATGAGGAGACTAGCACCTGCTTAACACTCATTTTTAAGGTGTCTTCCTAGAAAAGGAAGTGAATTTACACAAAAATAAGTAATGCTAATAATAATACCCTAACGGTAGTTCTGGTCCAATACACTCTGGCATTCGAATCCCATTATTATCCCCCCTTATCAAAGTCGTTATGTAAAATTACTTCCATTCCTCCAAAGAGCTTTTTCATAGTTGTTTCATTCTACATTATGAGAATTTCACGTGTTTTGTCAGGCTAGAATATTCAACTGTTACAATGGCTTA…	808	C	T
isotig02677	TTGCGACAAAGTTTTGAACTGGATCAACCTCTATGTCCATCAAGATTATTACAGAAAATTCAAAATGATAATCAACAAATAAAAATAGCTAGCAAGACAGCATCATGCAACCGCTGCATGAGGAGACTAGCACCTGCTTAACACTCATTTTTAAGGTGTCTTCCTAGAAAAGGAAGTGAATTTACACAAAAATAAGTAATGCTAATAATAATACCCTAACGGTAGTTCTGGTCCAATACACTCTGGCATTCGAATCCCATTATTATCCCCCCTTATCAAAGTCGTTATGTAAAATTACTTCCATTCCTCCAAAGAGCTTTTTCATAGTTGTTTCATTCTACATTATGAGAATTTCACGTGTTTTGTCAGGCTAGAATATTCAACTGTTACAATGGCTTA…	848	T	G
isotig02677	TTGCGACAAAGTTTTGAACTGGATCAACCTCTATGTCCATCAAGATTATTACAGAAAATTCAAAATGATAATCAACAAATAAAAATAGCTAGCAAGACAGCATCATGCAACCGCTGCATGAGGAGACTAGCACCTGCTTAACACTCATTTTTAAGGTGTCTTCCTAGAAAAGGAAGTGAATTTACACAAAAATAAGTAATGCTAATAATAATACCCTAACGGTAGTTCTGGTCCAATACACTCTGGCATTCGAATCCCATTATTATCCCCCCTTATCAAAGTCGTTATGTAAAATTACTTCCATTCCTCCAAAGAGCTTTTTCATAGTTGTTTCATTCTACATTATGAGAATTTCACGTGTTTTGTCAGGCTAGAATATTCAACTGTTACAATGGCTTA…	895	A	G
isotig02677	TTGCGACAAAGTTTTGAACTGGATCAACCTCTATGTCCATCAAGATTATTACAGAAAATTCAAAATGATAATCAACAAATAAAAATAGCTAGCAAGACAGCATCATGCAACCGCTGCATGAGGAGACTAGCACCTGCTTAACACTCATTTTTAAGGTGTCTTCCTAGAAAAGGAAGTGAATTTACACAAAAATAAGTAATGCTAATAATAATACCCTAACGGTAGTTCTGGTCCAATACACTCTGGCATTCGAATCCCATTATTATCCCCCCTTATCAAAGTCGTTATGTAAAATTACTTCCATTCCTCCAAAGAGCTTTTTCATAGTTGTTTCATTCTACATTATGAGAATTTCACGTGTTTTGTCAGGCTAGAATATTCAACTGTTACAATGGCTTA…	899	A	T
isotig02677	TTGCGACAAAGTTTTGAACTGGATCAACCTCTATGTCCATCAAGATTATTACAGAAAATTCAAAATGATAATCAACAAATAAAAATAGCTAGCAAGACAGCATCATGCAACCGCTGCATGAGGAGACTAGCACCTGCTTAACACTCATTTTTAAGGTGTCTTCCTAGAAAAGGAAGTGAATTTACACAAAAATAAGTAATGCTAATAATAATACCCTAACGGTAGTTCTGGTCCAATACACTCTGGCATTCGAATCCCATTATTATCCCCCCTTATCAAAGTCGTTATGTAAAATTACTTCCATTCCTCCAAAGAGCTTTTTCATAGTTGTTTCATTCTACATTATGAGAATTTCACGTGTTTTGTCAGGCTAGAATATTCAACTGTTACAATGGCTTA…	900	T	G
isotig02677	TTGCGACAAAGTTTTGAACTGGATCAACCTCTATGTCCATCAAGATTATTACAGAAAATTCAAAATGATAATCAACAAATAAAAATAGCTAGCAAGACAGCATCATGCAACCGCTGCATGAGGAGACTAGCACCTGCTTAACACTCATTTTTAAGGTGTCTTCCTAGAAAAGGAAGTGAATTTACACAAAAATAAGTAATGCTAATAATAATACCCTAACGGTAGTTCTGGTCCAATACACTCTGGCATTCGAATCCCATTATTATCCCCCCTTATCAAAGTCGTTATGTAAAATTACTTCCATTCCTCCAAAGAGCTTTTTCATAGTTGTTTCATTCTACATTATGAGAATTTCACGTGTTTTGTCAGGCTAGAATATTCAACTGTTACAATGGCTTA…	906	T	C
isotig02677	TTGCGACAAAGTTTTGAACTGGATCAACCTCTATGTCCATCAAGATTATTACAGAAAATTCAAAATGATAATCAACAAATAAAAATAGCTAGCAAGACAGCATCATGCAACCGCTGCATGAGGAGACTAGCACCTGCTTAACACTCATTTTTAAGGTGTCTTCCTAGAAAAGGAAGTGAATTTACACAAAAATAAGTAATGCTAATAATAATACCCTAACGGTAGTTCTGGTCCAATACACTCTGGCATTCGAATCCCATTATTATCCCCCCTTATCAAAGTCGTTATGTAAAATTACTTCCATTCCTCCAAAGAGCTTTTTCATAGTTGTTTCATTCTACATTATGAGAATTTCACGTGTTTTGTCAGGCTAGAATATTCAACTGTTACAATGGCTTA…	916	T	A
isotig02677	TTGCGACAAAGTTTTGAACTGGATCAACCTCTATGTCCATCAAGATTATTACAGAAAATTCAAAATGATAATCAACAAATAAAAATAGCTAGCAAGACAGCATCATGCAACCGCTGCATGAGGAGACTAGCACCTGCTTAACACTCATTTTTAAGGTGTCTTCCTAGAAAAGGAAGTGAATTTACACAAAAATAAGTAATGCTAATAATAATACCCTAACGGTAGTTCTGGTCCAATACACTCTGGCATTCGAATCCCATTATTATCCCCCCTTATCAAAGTCGTTATGTAAAATTACTTCCATTCCTCCAAAGAGCTTTTTCATAGTTGTTTCATTCTACATTATGAGAATTTCACGTGTTTTGTCAGGCTAGAATATTCAACTGTTACAATGGCTTA…	919	C	T
isotig02677	TTGCGACAAAGTTTTGAACTGGATCAACCTCTATGTCCATCAAGATTATTACAGAAAATTCAAAATGATAATCAACAAATAAAAATAGCTAGCAAGACAGCATCATGCAACCGCTGCATGAGGAGACTAGCACCTGCTTAACACTCATTTTTAAGGTGTCTTCCTAGAAAAGGAAGTGAATTTACACAAAAATAAGTAATGCTAATAATAATACCCTAACGGTAGTTCTGGTCCAATACACTCTGGCATTCGAATCCCATTATTATCCCCCCTTATCAAAGTCGTTATGTAAAATTACTTCCATTCCTCCAAAGAGCTTTTTCATAGTTGTTTCATTCTACATTATGAGAATTTCACGTGTTTTGTCAGGCTAGAATATTCAACTGTTACAATGGCTTA…	996	C	T
isotig02677	TTGCGACAAAGTTTTGAACTGGATCAACCTCTATGTCCATCAAGATTATTACAGAAAATTCAAAATGATAATCAACAAATAAAAATAGCTAGCAAGACAGCATCATGCAACCGCTGCATGAGGAGACTAGCACCTGCTTAACACTCATTTTTAAGGTGTCTTCCTAGAAAAGGAAGTGAATTTACACAAAAATAAGTAATGCTAATAATAATACCCTAACGGTAGTTCTGGTCCAATACACTCTGGCATTCGAATCCCATTATTATCCCCCCTTATCAAAGTCGTTATGTAAAATTACTTCCATTCCTCCAAAGAGCTTTTTCATAGTTGTTTCATTCTACATTATGAGAATTTCACGTGTTTTGTCAGGCTAGAATATTCAACTGTTACAATGGCTTA…	1008	A	G
isotig02677	TTGCGACAAAGTTTTGAACTGGATCAACCTCTATGTCCATCAAGATTATTACAGAAAATTCAAAATGATAATCAACAAATAAAAATAGCTAGCAAGACAGCATCATGCAACCGCTGCATGAGGAGACTAGCACCTGCTTAACACTCATTTTTAAGGTGTCTTCCTAGAAAAGGAAGTGAATTTACACAAAAATAAGTAATGCTAATAATAATACCCTAACGGTAGTTCTGGTCCAATACACTCTGGCATTCGAATCCCATTATTATCCCCCCTTATCAAAGTCGTTATGTAAAATTACTTCCATTCCTCCAAAGAGCTTTTTCATAGTTGTTTCATTCTACATTATGAGAATTTCACGTGTTTTGTCAGGCTAGAATATTCAACTGTTACAATGGCTTA…	1023	C	A
isotig02677	TTGCGACAAAGTTTTGAACTGGATCAACCTCTATGTCCATCAAGATTATTACAGAAAATTCAAAATGATAATCAACAAATAAAAATAGCTAGCAAGACAGCATCATGCAACCGCTGCATGAGGAGACTAGCACCTGCTTAACACTCATTTTTAAGGTGTCTTCCTAGAAAAGGAAGTGAATTTACACAAAAATAAGTAATGCTAATAATAATACCCTAACGGTAGTTCTGGTCCAATACACTCTGGCATTCGAATCCCATTATTATCCCCCCTTATCAAAGTCGTTATGTAAAATTACTTCCATTCCTCCAAAGAGCTTTTTCATAGTTGTTTCATTCTACATTATGAGAATTTCACGTGTTTTGTCAGGCTAGAATATTCAACTGTTACAATGGCTTA…	1096	G	C
isotig02677	TTGCGACAAAGTTTTGAACTGGATCAACCTCTATGTCCATCAAGATTATTACAGAAAATTCAAAATGATAATCAACAAATAAAAATAGCTAGCAAGACAGCATCATGCAACCGCTGCATGAGGAGACTAGCACCTGCTTAACACTCATTTTTAAGGTGTCTTCCTAGAAAAGGAAGTGAATTTACACAAAAATAAGTAATGCTAATAATAATACCCTAACGGTAGTTCTGGTCCAATACACTCTGGCATTCGAATCCCATTATTATCCCCCCTTATCAAAGTCGTTATGTAAAATTACTTCCATTCCTCCAAAGAGCTTTTTCATAGTTGTTTCATTCTACATTATGAGAATTTCACGTGTTTTGTCAGGCTAGAATATTCAACTGTTACAATGGCTTA…	1126	G	C
isotig02677	TTGCGACAAAGTTTTGAACTGGATCAACCTCTATGTCCATCAAGATTATTACAGAAAATTCAAAATGATAATCAACAAATAAAAATAGCTAGCAAGACAGCATCATGCAACCGCTGCATGAGGAGACTAGCACCTGCTTAACACTCATTTTTAAGGTGTCTTCCTAGAAAAGGAAGTGAATTTACACAAAAATAAGTAATGCTAATAATAATACCCTAACGGTAGTTCTGGTCCAATACACTCTGGCATTCGAATCCCATTATTATCCCCCCTTATCAAAGTCGTTATGTAAAATTACTTCCATTCCTCCAAAGAGCTTTTTCATAGTTGTTTCATTCTACATTATGAGAATTTCACGTGTTTTGTCAGGCTAGAATATTCAACTGTTACAATGGCTTA…	1129	G	A
isotig02677	TTGCGACAAAGTTTTGAACTGGATCAACCTCTATGTCCATCAAGATTATTACAGAAAATTCAAAATGATAATCAACAAATAAAAATAGCTAGCAAGACAGCATCATGCAACCGCTGCATGAGGAGACTAGCACCTGCTTAACACTCATTTTTAAGGTGTCTTCCTAGAAAAGGAAGTGAATTTACACAAAAATAAGTAATGCTAATAATAATACCCTAACGGTAGTTCTGGTCCAATACACTCTGGCATTCGAATCCCATTATTATCCCCCCTTATCAAAGTCGTTATGTAAAATTACTTCCATTCCTCCAAAGAGCTTTTTCATAGTTGTTTCATTCTACATTATGAGAATTTCACGTGTTTTGTCAGGCTAGAATATTCAACTGTTACAATGGCTTA…	1141	A	G
isotig02677	TTGCGACAAAGTTTTGAACTGGATCAACCTCTATGTCCATCAAGATTATTACAGAAAATTCAAAATGATAATCAACAAATAAAAATAGCTAGCAAGACAGCATCATGCAACCGCTGCATGAGGAGACTAGCACCTGCTTAACACTCATTTTTAAGGTGTCTTCCTAGAAAAGGAAGTGAATTTACACAAAAATAAGTAATGCTAATAATAATACCCTAACGGTAGTTCTGGTCCAATACACTCTGGCATTCGAATCCCATTATTATCCCCCCTTATCAAAGTCGTTATGTAAAATTACTTCCATTCCTCCAAAGAGCTTTTTCATAGTTGTTTCATTCTACATTATGAGAATTTCACGTGTTTTGTCAGGCTAGAATATTCAACTGTTACAATGGCTTA…	1145	C	T
isotig02677	TTGCGACAAAGTTTTGAACTGGATCAACCTCTATGTCCATCAAGATTATTACAGAAAATTCAAAATGATAATCAACAAATAAAAATAGCTAGCAAGACAGCATCATGCAACCGCTGCATGAGGAGACTAGCACCTGCTTAACACTCATTTTTAAGGTGTCTTCCTAGAAAAGGAAGTGAATTTACACAAAAATAAGTAATGCTAATAATAATACCCTAACGGTAGTTCTGGTCCAATACACTCTGGCATTCGAATCCCATTATTATCCCCCCTTATCAAAGTCGTTATGTAAAATTACTTCCATTCCTCCAAAGAGCTTTTTCATAGTTGTTTCATTCTACATTATGAGAATTTCACGTGTTTTGTCAGGCTAGAATATTCAACTGTTACAATGGCTTA…	1156	C	T
isotig02677	TTGCGACAAAGTTTTGAACTGGATCAACCTCTATGTCCATCAAGATTATTACAGAAAATTCAAAATGATAATCAACAAATAAAAATAGCTAGCAAGACAGCATCATGCAACCGCTGCATGAGGAGACTAGCACCTGCTTAACACTCATTTTTAAGGTGTCTTCCTAGAAAAGGAAGTGAATTTACACAAAAATAAGTAATGCTAATAATAATACCCTAACGGTAGTTCTGGTCCAATACACTCTGGCATTCGAATCCCATTATTATCCCCCCTTATCAAAGTCGTTATGTAAAATTACTTCCATTCCTCCAAAGAGCTTTTTCATAGTTGTTTCATTCTACATTATGAGAATTTCACGTGTTTTGTCAGGCTAGAATATTCAACTGTTACAATGGCTTA…	1173	C	G
isotig02677	TTGCGACAAAGTTTTGAACTGGATCAACCTCTATGTCCATCAAGATTATTACAGAAAATTCAAAATGATAATCAACAAATAAAAATAGCTAGCAAGACAGCATCATGCAACCGCTGCATGAGGAGACTAGCACCTGCTTAACACTCATTTTTAAGGTGTCTTCCTAGAAAAGGAAGTGAATTTACACAAAAATAAGTAATGCTAATAATAATACCCTAACGGTAGTTCTGGTCCAATACACTCTGGCATTCGAATCCCATTATTATCCCCCCTTATCAAAGTCGTTATGTAAAATTACTTCCATTCCTCCAAAGAGCTTTTTCATAGTTGTTTCATTCTACATTATGAGAATTTCACGTGTTTTGTCAGGCTAGAATATTCAACTGTTACAATGGCTTA…	1197	C	T
isotig02677	TTGCGACAAAGTTTTGAACTGGATCAACCTCTATGTCCATCAAGATTATTACAGAAAATTCAAAATGATAATCAACAAATAAAAATAGCTAGCAAGACAGCATCATGCAACCGCTGCATGAGGAGACTAGCACCTGCTTAACACTCATTTTTAAGGTGTCTTCCTAGAAAAGGAAGTGAATTTACACAAAAATAAGTAATGCTAATAATAATACCCTAACGGTAGTTCTGGTCCAATACACTCTGGCATTCGAATCCCATTATTATCCCCCCTTATCAAAGTCGTTATGTAAAATTACTTCCATTCCTCCAAAGAGCTTTTTCATAGTTGTTTCATTCTACATTATGAGAATTTCACGTGTTTTGTCAGGCTAGAATATTCAACTGTTACAATGGCTTA…	1199	G	C
isotig02677	TTGCGACAAAGTTTTGAACTGGATCAACCTCTATGTCCATCAAGATTATTACAGAAAATTCAAAATGATAATCAACAAATAAAAATAGCTAGCAAGACAGCATCATGCAACCGCTGCATGAGGAGACTAGCACCTGCTTAACACTCATTTTTAAGGTGTCTTCCTAGAAAAGGAAGTGAATTTACACAAAAATAAGTAATGCTAATAATAATACCCTAACGGTAGTTCTGGTCCAATACACTCTGGCATTCGAATCCCATTATTATCCCCCCTTATCAAAGTCGTTATGTAAAATTACTTCCATTCCTCCAAAGAGCTTTTTCATAGTTGTTTCATTCTACATTATGAGAATTTCACGTGTTTTGTCAGGCTAGAATATTCAACTGTTACAATGGCTTA…	1231	C	T
isotig02677	TTGCGACAAAGTTTTGAACTGGATCAACCTCTATGTCCATCAAGATTATTACAGAAAATTCAAAATGATAATCAACAAATAAAAATAGCTAGCAAGACAGCATCATGCAACCGCTGCATGAGGAGACTAGCACCTGCTTAACACTCATTTTTAAGGTGTCTTCCTAGAAAAGGAAGTGAATTTACACAAAAATAAGTAATGCTAATAATAATACCCTAACGGTAGTTCTGGTCCAATACACTCTGGCATTCGAATCCCATTATTATCCCCCCTTATCAAAGTCGTTATGTAAAATTACTTCCATTCCTCCAAAGAGCTTTTTCATAGTTGTTTCATTCTACATTATGAGAATTTCACGTGTTTTGTCAGGCTAGAATATTCAACTGTTACAATGGCTTA…	1244	C	A
isotig02677	TTGCGACAAAGTTTTGAACTGGATCAACCTCTATGTCCATCAAGATTATTACAGAAAATTCAAAATGATAATCAACAAATAAAAATAGCTAGCAAGACAGCATCATGCAACCGCTGCATGAGGAGACTAGCACCTGCTTAACACTCATTTTTAAGGTGTCTTCCTAGAAAAGGAAGTGAATTTACACAAAAATAAGTAATGCTAATAATAATACCCTAACGGTAGTTCTGGTCCAATACACTCTGGCATTCGAATCCCATTATTATCCCCCCTTATCAAAGTCGTTATGTAAAATTACTTCCATTCCTCCAAAGAGCTTTTTCATAGTTGTTTCATTCTACATTATGAGAATTTCACGTGTTTTGTCAGGCTAGAATATTCAACTGTTACAATGGCTTA…	1250	C	T
isotig02677	TTGCGACAAAGTTTTGAACTGGATCAACCTCTATGTCCATCAAGATTATTACAGAAAATTCAAAATGATAATCAACAAATAAAAATAGCTAGCAAGACAGCATCATGCAACCGCTGCATGAGGAGACTAGCACCTGCTTAACACTCATTTTTAAGGTGTCTTCCTAGAAAAGGAAGTGAATTTACACAAAAATAAGTAATGCTAATAATAATACCCTAACGGTAGTTCTGGTCCAATACACTCTGGCATTCGAATCCCATTATTATCCCCCCTTATCAAAGTCGTTATGTAAAATTACTTCCATTCCTCCAAAGAGCTTTTTCATAGTTGTTTCATTCTACATTATGAGAATTTCACGTGTTTTGTCAGGCTAGAATATTCAACTGTTACAATGGCTTA…	1253	A	T
isotig02677	TTGCGACAAAGTTTTGAACTGGATCAACCTCTATGTCCATCAAGATTATTACAGAAAATTCAAAATGATAATCAACAAATAAAAATAGCTAGCAAGACAGCATCATGCAACCGCTGCATGAGGAGACTAGCACCTGCTTAACACTCATTTTTAAGGTGTCTTCCTAGAAAAGGAAGTGAATTTACACAAAAATAAGTAATGCTAATAATAATACCCTAACGGTAGTTCTGGTCCAATACACTCTGGCATTCGAATCCCATTATTATCCCCCCTTATCAAAGTCGTTATGTAAAATTACTTCCATTCCTCCAAAGAGCTTTTTCATAGTTGTTTCATTCTACATTATGAGAATTTCACGTGTTTTGTCAGGCTAGAATATTCAACTGTTACAATGGCTTA…	1254	C	A
isotig02677	TTGCGACAAAGTTTTGAACTGGATCAACCTCTATGTCCATCAAGATTATTACAGAAAATTCAAAATGATAATCAACAAATAAAAATAGCTAGCAAGACAGCATCATGCAACCGCTGCATGAGGAGACTAGCACCTGCTTAACACTCATTTTTAAGGTGTCTTCCTAGAAAAGGAAGTGAATTTACACAAAAATAAGTAATGCTAATAATAATACCCTAACGGTAGTTCTGGTCCAATACACTCTGGCATTCGAATCCCATTATTATCCCCCCTTATCAAAGTCGTTATGTAAAATTACTTCCATTCCTCCAAAGAGCTTTTTCATAGTTGTTTCATTCTACATTATGAGAATTTCACGTGTTTTGTCAGGCTAGAATATTCAACTGTTACAATGGCTTA…	1261	C	T
isotig02677	TTGCGACAAAGTTTTGAACTGGATCAACCTCTATGTCCATCAAGATTATTACAGAAAATTCAAAATGATAATCAACAAATAAAAATAGCTAGCAAGACAGCATCATGCAACCGCTGCATGAGGAGACTAGCACCTGCTTAACACTCATTTTTAAGGTGTCTTCCTAGAAAAGGAAGTGAATTTACACAAAAATAAGTAATGCTAATAATAATACCCTAACGGTAGTTCTGGTCCAATACACTCTGGCATTCGAATCCCATTATTATCCCCCCTTATCAAAGTCGTTATGTAAAATTACTTCCATTCCTCCAAAGAGCTTTTTCATAGTTGTTTCATTCTACATTATGAGAATTTCACGTGTTTTGTCAGGCTAGAATATTCAACTGTTACAATGGCTTA…	1269	C	T
isotig02677	TTGCGACAAAGTTTTGAACTGGATCAACCTCTATGTCCATCAAGATTATTACAGAAAATTCAAAATGATAATCAACAAATAAAAATAGCTAGCAAGACAGCATCATGCAACCGCTGCATGAGGAGACTAGCACCTGCTTAACACTCATTTTTAAGGTGTCTTCCTAGAAAAGGAAGTGAATTTACACAAAAATAAGTAATGCTAATAATAATACCCTAACGGTAGTTCTGGTCCAATACACTCTGGCATTCGAATCCCATTATTATCCCCCCTTATCAAAGTCGTTATGTAAAATTACTTCCATTCCTCCAAAGAGCTTTTTCATAGTTGTTTCATTCTACATTATGAGAATTTCACGTGTTTTGTCAGGCTAGAATATTCAACTGTTACAATGGCTTA…	1308	G	T
isotig02677	TTGCGACAAAGTTTTGAACTGGATCAACCTCTATGTCCATCAAGATTATTACAGAAAATTCAAAATGATAATCAACAAATAAAAATAGCTAGCAAGACAGCATCATGCAACCGCTGCATGAGGAGACTAGCACCTGCTTAACACTCATTTTTAAGGTGTCTTCCTAGAAAAGGAAGTGAATTTACACAAAAATAAGTAATGCTAATAATAATACCCTAACGGTAGTTCTGGTCCAATACACTCTGGCATTCGAATCCCATTATTATCCCCCCTTATCAAAGTCGTTATGTAAAATTACTTCCATTCCTCCAAAGAGCTTTTTCATAGTTGTTTCATTCTACATTATGAGAATTTCACGTGTTTTGTCAGGCTAGAATATTCAACTGTTACAATGGCTTA…	1314	C	A
isotig02677	TTGCGACAAAGTTTTGAACTGGATCAACCTCTATGTCCATCAAGATTATTACAGAAAATTCAAAATGATAATCAACAAATAAAAATAGCTAGCAAGACAGCATCATGCAACCGCTGCATGAGGAGACTAGCACCTGCTTAACACTCATTTTTAAGGTGTCTTCCTAGAAAAGGAAGTGAATTTACACAAAAATAAGTAATGCTAATAATAATACCCTAACGGTAGTTCTGGTCCAATACACTCTGGCATTCGAATCCCATTATTATCCCCCCTTATCAAAGTCGTTATGTAAAATTACTTCCATTCCTCCAAAGAGCTTTTTCATAGTTGTTTCATTCTACATTATGAGAATTTCACGTGTTTTGTCAGGCTAGAATATTCAACTGTTACAATGGCTTA…	1332	T	C
isotig02677	TTGCGACAAAGTTTTGAACTGGATCAACCTCTATGTCCATCAAGATTATTACAGAAAATTCAAAATGATAATCAACAAATAAAAATAGCTAGCAAGACAGCATCATGCAACCGCTGCATGAGGAGACTAGCACCTGCTTAACACTCATTTTTAAGGTGTCTTCCTAGAAAAGGAAGTGAATTTACACAAAAATAAGTAATGCTAATAATAATACCCTAACGGTAGTTCTGGTCCAATACACTCTGGCATTCGAATCCCATTATTATCCCCCCTTATCAAAGTCGTTATGTAAAATTACTTCCATTCCTCCAAAGAGCTTTTTCATAGTTGTTTCATTCTACATTATGAGAATTTCACGTGTTTTGTCAGGCTAGAATATTCAACTGTTACAATGGCTTA…	1434	C	T
isotig02677	TTGCGACAAAGTTTTGAACTGGATCAACCTCTATGTCCATCAAGATTATTACAGAAAATTCAAAATGATAATCAACAAATAAAAATAGCTAGCAAGACAGCATCATGCAACCGCTGCATGAGGAGACTAGCACCTGCTTAACACTCATTTTTAAGGTGTCTTCCTAGAAAAGGAAGTGAATTTACACAAAAATAAGTAATGCTAATAATAATACCCTAACGGTAGTTCTGGTCCAATACACTCTGGCATTCGAATCCCATTATTATCCCCCCTTATCAAAGTCGTTATGTAAAATTACTTCCATTCCTCCAAAGAGCTTTTTCATAGTTGTTTCATTCTACATTATGAGAATTTCACGTGTTTTGTCAGGCTAGAATATTCAACTGTTACAATGGCTTA…	1506	T	C
isotig02677	TTGCGACAAAGTTTTGAACTGGATCAACCTCTATGTCCATCAAGATTATTACAGAAAATTCAAAATGATAATCAACAAATAAAAATAGCTAGCAAGACAGCATCATGCAACCGCTGCATGAGGAGACTAGCACCTGCTTAACACTCATTTTTAAGGTGTCTTCCTAGAAAAGGAAGTGAATTTACACAAAAATAAGTAATGCTAATAATAATACCCTAACGGTAGTTCTGGTCCAATACACTCTGGCATTCGAATCCCATTATTATCCCCCCTTATCAAAGTCGTTATGTAAAATTACTTCCATTCCTCCAAAGAGCTTTTTCATAGTTGTTTCATTCTACATTATGAGAATTTCACGTGTTTTGTCAGGCTAGAATATTCAACTGTTACAATGGCTTA…	1998	T	G
isotig02677	TTGCGACAAAGTTTTGAACTGGATCAACCTCTATGTCCATCAAGATTATTACAGAAAATTCAAAATGATAATCAACAAATAAAAATAGCTAGCAAGACAGCATCATGCAACCGCTGCATGAGGAGACTAGCACCTGCTTAACACTCATTTTTAAGGTGTCTTCCTAGAAAAGGAAGTGAATTTACACAAAAATAAGTAATGCTAATAATAATACCCTAACGGTAGTTCTGGTCCAATACACTCTGGCATTCGAATCCCATTATTATCCCCCCTTATCAAAGTCGTTATGTAAAATTACTTCCATTCCTCCAAAGAGCTTTTTCATAGTTGTTTCATTCTACATTATGAGAATTTCACGTGTTTTGTCAGGCTAGAATATTCAACTGTTACAATGGCTTA…	2000	C	G
isotig02677	TTGCGACAAAGTTTTGAACTGGATCAACCTCTATGTCCATCAAGATTATTACAGAAAATTCAAAATGATAATCAACAAATAAAAATAGCTAGCAAGACAGCATCATGCAACCGCTGCATGAGGAGACTAGCACCTGCTTAACACTCATTTTTAAGGTGTCTTCCTAGAAAAGGAAGTGAATTTACACAAAAATAAGTAATGCTAATAATAATACCCTAACGGTAGTTCTGGTCCAATACACTCTGGCATTCGAATCCCATTATTATCCCCCCTTATCAAAGTCGTTATGTAAAATTACTTCCATTCCTCCAAAGAGCTTTTTCATAGTTGTTTCATTCTACATTATGAGAATTTCACGTGTTTTGTCAGGCTAGAATATTCAACTGTTACAATGGCTTA…	2016	G	A
isotig02677	TTGCGACAAAGTTTTGAACTGGATCAACCTCTATGTCCATCAAGATTATTACAGAAAATTCAAAATGATAATCAACAAATAAAAATAGCTAGCAAGACAGCATCATGCAACCGCTGCATGAGGAGACTAGCACCTGCTTAACACTCATTTTTAAGGTGTCTTCCTAGAAAAGGAAGTGAATTTACACAAAAATAAGTAATGCTAATAATAATACCCTAACGGTAGTTCTGGTCCAATACACTCTGGCATTCGAATCCCATTATTATCCCCCCTTATCAAAGTCGTTATGTAAAATTACTTCCATTCCTCCAAAGAGCTTTTTCATAGTTGTTTCATTCTACATTATGAGAATTTCACGTGTTTTGTCAGGCTAGAATATTCAACTGTTACAATGGCTTA…	2017	C	G
isotig02677	TTGCGACAAAGTTTTGAACTGGATCAACCTCTATGTCCATCAAGATTATTACAGAAAATTCAAAATGATAATCAACAAATAAAAATAGCTAGCAAGACAGCATCATGCAACCGCTGCATGAGGAGACTAGCACCTGCTTAACACTCATTTTTAAGGTGTCTTCCTAGAAAAGGAAGTGAATTTACACAAAAATAAGTAATGCTAATAATAATACCCTAACGGTAGTTCTGGTCCAATACACTCTGGCATTCGAATCCCATTATTATCCCCCCTTATCAAAGTCGTTATGTAAAATTACTTCCATTCCTCCAAAGAGCTTTTTCATAGTTGTTTCATTCTACATTATGAGAATTTCACGTGTTTTGTCAGGCTAGAATATTCAACTGTTACAATGGCTTA…	2073	T	C
isotig02677	TTGCGACAAAGTTTTGAACTGGATCAACCTCTATGTCCATCAAGATTATTACAGAAAATTCAAAATGATAATCAACAAATAAAAATAGCTAGCAAGACAGCATCATGCAACCGCTGCATGAGGAGACTAGCACCTGCTTAACACTCATTTTTAAGGTGTCTTCCTAGAAAAGGAAGTGAATTTACACAAAAATAAGTAATGCTAATAATAATACCCTAACGGTAGTTCTGGTCCAATACACTCTGGCATTCGAATCCCATTATTATCCCCCCTTATCAAAGTCGTTATGTAAAATTACTTCCATTCCTCCAAAGAGCTTTTTCATAGTTGTTTCATTCTACATTATGAGAATTTCACGTGTTTTGTCAGGCTAGAATATTCAACTGTTACAATGGCTTA…	2337	A	G
isotig02677	TTGCGACAAAGTTTTGAACTGGATCAACCTCTATGTCCATCAAGATTATTACAGAAAATTCAAAATGATAATCAACAAATAAAAATAGCTAGCAAGACAGCATCATGCAACCGCTGCATGAGGAGACTAGCACCTGCTTAACACTCATTTTTAAGGTGTCTTCCTAGAAAAGGAAGTGAATTTACACAAAAATAAGTAATGCTAATAATAATACCCTAACGGTAGTTCTGGTCCAATACACTCTGGCATTCGAATCCCATTATTATCCCCCCTTATCAAAGTCGTTATGTAAAATTACTTCCATTCCTCCAAAGAGCTTTTTCATAGTTGTTTCATTCTACATTATGAGAATTTCACGTGTTTTGTCAGGCTAGAATATTCAACTGTTACAATGGCTTA…	2339	T	C
isotig02677	TTGCGACAAAGTTTTGAACTGGATCAACCTCTATGTCCATCAAGATTATTACAGAAAATTCAAAATGATAATCAACAAATAAAAATAGCTAGCAAGACAGCATCATGCAACCGCTGCATGAGGAGACTAGCACCTGCTTAACACTCATTTTTAAGGTGTCTTCCTAGAAAAGGAAGTGAATTTACACAAAAATAAGTAATGCTAATAATAATACCCTAACGGTAGTTCTGGTCCAATACACTCTGGCATTCGAATCCCATTATTATCCCCCCTTATCAAAGTCGTTATGTAAAATTACTTCCATTCCTCCAAAGAGCTTTTTCATAGTTGTTTCATTCTACATTATGAGAATTTCACGTGTTTTGTCAGGCTAGAATATTCAACTGTTACAATGGCTTA…	2352	C	T
isotig02677	TTGCGACAAAGTTTTGAACTGGATCAACCTCTATGTCCATCAAGATTATTACAGAAAATTCAAAATGATAATCAACAAATAAAAATAGCTAGCAAGACAGCATCATGCAACCGCTGCATGAGGAGACTAGCACCTGCTTAACACTCATTTTTAAGGTGTCTTCCTAGAAAAGGAAGTGAATTTACACAAAAATAAGTAATGCTAATAATAATACCCTAACGGTAGTTCTGGTCCAATACACTCTGGCATTCGAATCCCATTATTATCCCCCCTTATCAAAGTCGTTATGTAAAATTACTTCCATTCCTCCAAAGAGCTTTTTCATAGTTGTTTCATTCTACATTATGAGAATTTCACGTGTTTTGTCAGGCTAGAATATTCAACTGTTACAATGGCTTA…	2361	C	T
isotig02677	TTGCGACAAAGTTTTGAACTGGATCAACCTCTATGTCCATCAAGATTATTACAGAAAATTCAAAATGATAATCAACAAATAAAAATAGCTAGCAAGACAGCATCATGCAACCGCTGCATGAGGAGACTAGCACCTGCTTAACACTCATTTTTAAGGTGTCTTCCTAGAAAAGGAAGTGAATTTACACAAAAATAAGTAATGCTAATAATAATACCCTAACGGTAGTTCTGGTCCAATACACTCTGGCATTCGAATCCCATTATTATCCCCCCTTATCAAAGTCGTTATGTAAAATTACTTCCATTCCTCCAAAGAGCTTTTTCATAGTTGTTTCATTCTACATTATGAGAATTTCACGTGTTTTGTCAGGCTAGAATATTCAACTGTTACAATGGCTTA…	2405	T	A
isotig02677	TTGCGACAAAGTTTTGAACTGGATCAACCTCTATGTCCATCAAGATTATTACAGAAAATTCAAAATGATAATCAACAAATAAAAATAGCTAGCAAGACAGCATCATGCAACCGCTGCATGAGGAGACTAGCACCTGCTTAACACTCATTTTTAAGGTGTCTTCCTAGAAAAGGAAGTGAATTTACACAAAAATAAGTAATGCTAATAATAATACCCTAACGGTAGTTCTGGTCCAATACACTCTGGCATTCGAATCCCATTATTATCCCCCCTTATCAAAGTCGTTATGTAAAATTACTTCCATTCCTCCAAAGAGCTTTTTCATAGTTGTTTCATTCTACATTATGAGAATTTCACGTGTTTTGTCAGGCTAGAATATTCAACTGTTACAATGGCTTA…	2408	T	C
isotig02677	TTGCGACAAAGTTTTGAACTGGATCAACCTCTATGTCCATCAAGATTATTACAGAAAATTCAAAATGATAATCAACAAATAAAAATAGCTAGCAAGACAGCATCATGCAACCGCTGCATGAGGAGACTAGCACCTGCTTAACACTCATTTTTAAGGTGTCTTCCTAGAAAAGGAAGTGAATTTACACAAAAATAAGTAATGCTAATAATAATACCCTAACGGTAGTTCTGGTCCAATACACTCTGGCATTCGAATCCCATTATTATCCCCCCTTATCAAAGTCGTTATGTAAAATTACTTCCATTCCTCCAAAGAGCTTTTTCATAGTTGTTTCATTCTACATTATGAGAATTTCACGTGTTTTGTCAGGCTAGAATATTCAACTGTTACAATGGCTTA…	2430	C	G
isotig02677	TTGCGACAAAGTTTTGAACTGGATCAACCTCTATGTCCATCAAGATTATTACAGAAAATTCAAAATGATAATCAACAAATAAAAATAGCTAGCAAGACAGCATCATGCAACCGCTGCATGAGGAGACTAGCACCTGCTTAACACTCATTTTTAAGGTGTCTTCCTAGAAAAGGAAGTGAATTTACACAAAAATAAGTAATGCTAATAATAATACCCTAACGGTAGTTCTGGTCCAATACACTCTGGCATTCGAATCCCATTATTATCCCCCCTTATCAAAGTCGTTATGTAAAATTACTTCCATTCCTCCAAAGAGCTTTTTCATAGTTGTTTCATTCTACATTATGAGAATTTCACGTGTTTTGTCAGGCTAGAATATTCAACTGTTACAATGGCTTA…	2436	C	T
isotig02677	TTGCGACAAAGTTTTGAACTGGATCAACCTCTATGTCCATCAAGATTATTACAGAAAATTCAAAATGATAATCAACAAATAAAAATAGCTAGCAAGACAGCATCATGCAACCGCTGCATGAGGAGACTAGCACCTGCTTAACACTCATTTTTAAGGTGTCTTCCTAGAAAAGGAAGTGAATTTACACAAAAATAAGTAATGCTAATAATAATACCCTAACGGTAGTTCTGGTCCAATACACTCTGGCATTCGAATCCCATTATTATCCCCCCTTATCAAAGTCGTTATGTAAAATTACTTCCATTCCTCCAAAGAGCTTTTTCATAGTTGTTTCATTCTACATTATGAGAATTTCACGTGTTTTGTCAGGCTAGAATATTCAACTGTTACAATGGCTTA…	2441	A	T
isotig02677	TTGCGACAAAGTTTTGAACTGGATCAACCTCTATGTCCATCAAGATTATTACAGAAAATTCAAAATGATAATCAACAAATAAAAATAGCTAGCAAGACAGCATCATGCAACCGCTGCATGAGGAGACTAGCACCTGCTTAACACTCATTTTTAAGGTGTCTTCCTAGAAAAGGAAGTGAATTTACACAAAAATAAGTAATGCTAATAATAATACCCTAACGGTAGTTCTGGTCCAATACACTCTGGCATTCGAATCCCATTATTATCCCCCCTTATCAAAGTCGTTATGTAAAATTACTTCCATTCCTCCAAAGAGCTTTTTCATAGTTGTTTCATTCTACATTATGAGAATTTCACGTGTTTTGTCAGGCTAGAATATTCAACTGTTACAATGGCTTA…	2482	G	A
isotig02677	TTGCGACAAAGTTTTGAACTGGATCAACCTCTATGTCCATCAAGATTATTACAGAAAATTCAAAATGATAATCAACAAATAAAAATAGCTAGCAAGACAGCATCATGCAACCGCTGCATGAGGAGACTAGCACCTGCTTAACACTCATTTTTAAGGTGTCTTCCTAGAAAAGGAAGTGAATTTACACAAAAATAAGTAATGCTAATAATAATACCCTAACGGTAGTTCTGGTCCAATACACTCTGGCATTCGAATCCCATTATTATCCCCCCTTATCAAAGTCGTTATGTAAAATTACTTCCATTCCTCCAAAGAGCTTTTTCATAGTTGTTTCATTCTACATTATGAGAATTTCACGTGTTTTGTCAGGCTAGAATATTCAACTGTTACAATGGCTTA…	2483	G	C
isotig02677	TTGCGACAAAGTTTTGAACTGGATCAACCTCTATGTCCATCAAGATTATTACAGAAAATTCAAAATGATAATCAACAAATAAAAATAGCTAGCAAGACAGCATCATGCAACCGCTGCATGAGGAGACTAGCACCTGCTTAACACTCATTTTTAAGGTGTCTTCCTAGAAAAGGAAGTGAATTTACACAAAAATAAGTAATGCTAATAATAATACCCTAACGGTAGTTCTGGTCCAATACACTCTGGCATTCGAATCCCATTATTATCCCCCCTTATCAAAGTCGTTATGTAAAATTACTTCCATTCCTCCAAAGAGCTTTTTCATAGTTGTTTCATTCTACATTATGAGAATTTCACGTGTTTTGTCAGGCTAGAATATTCAACTGTTACAATGGCTTA…	2505	C	T
isotig02677	TTGCGACAAAGTTTTGAACTGGATCAACCTCTATGTCCATCAAGATTATTACAGAAAATTCAAAATGATAATCAACAAATAAAAATAGCTAGCAAGACAGCATCATGCAACCGCTGCATGAGGAGACTAGCACCTGCTTAACACTCATTTTTAAGGTGTCTTCCTAGAAAAGGAAGTGAATTTACACAAAAATAAGTAATGCTAATAATAATACCCTAACGGTAGTTCTGGTCCAATACACTCTGGCATTCGAATCCCATTATTATCCCCCCTTATCAAAGTCGTTATGTAAAATTACTTCCATTCCTCCAAAGAGCTTTTTCATAGTTGTTTCATTCTACATTATGAGAATTTCACGTGTTTTGTCAGGCTAGAATATTCAACTGTTACAATGGCTTA…	2509	A	T
isotig02677	TTGCGACAAAGTTTTGAACTGGATCAACCTCTATGTCCATCAAGATTATTACAGAAAATTCAAAATGATAATCAACAAATAAAAATAGCTAGCAAGACAGCATCATGCAACCGCTGCATGAGGAGACTAGCACCTGCTTAACACTCATTTTTAAGGTGTCTTCCTAGAAAAGGAAGTGAATTTACACAAAAATAAGTAATGCTAATAATAATACCCTAACGGTAGTTCTGGTCCAATACACTCTGGCATTCGAATCCCATTATTATCCCCCCTTATCAAAGTCGTTATGTAAAATTACTTCCATTCCTCCAAAGAGCTTTTTCATAGTTGTTTCATTCTACATTATGAGAATTTCACGTGTTTTGTCAGGCTAGAATATTCAACTGTTACAATGGCTTA…	2727	C	T
isotig02677	TTGCGACAAAGTTTTGAACTGGATCAACCTCTATGTCCATCAAGATTATTACAGAAAATTCAAAATGATAATCAACAAATAAAAATAGCTAGCAAGACAGCATCATGCAACCGCTGCATGAGGAGACTAGCACCTGCTTAACACTCATTTTTAAGGTGTCTTCCTAGAAAAGGAAGTGAATTTACACAAAAATAAGTAATGCTAATAATAATACCCTAACGGTAGTTCTGGTCCAATACACTCTGGCATTCGAATCCCATTATTATCCCCCCTTATCAAAGTCGTTATGTAAAATTACTTCCATTCCTCCAAAGAGCTTTTTCATAGTTGTTTCATTCTACATTATGAGAATTTCACGTGTTTTGTCAGGCTAGAATATTCAACTGTTACAATGGCTTA…	2790	T	A
isotig02677	TTGCGACAAAGTTTTGAACTGGATCAACCTCTATGTCCATCAAGATTATTACAGAAAATTCAAAATGATAATCAACAAATAAAAATAGCTAGCAAGACAGCATCATGCAACCGCTGCATGAGGAGACTAGCACCTGCTTAACACTCATTTTTAAGGTGTCTTCCTAGAAAAGGAAGTGAATTTACACAAAAATAAGTAATGCTAATAATAATACCCTAACGGTAGTTCTGGTCCAATACACTCTGGCATTCGAATCCCATTATTATCCCCCCTTATCAAAGTCGTTATGTAAAATTACTTCCATTCCTCCAAAGAGCTTTTTCATAGTTGTTTCATTCTACATTATGAGAATTTCACGTGTTTTGTCAGGCTAGAATATTCAACTGTTACAATGGCTTA…	2793	C	T
isotig02677	TTGCGACAAAGTTTTGAACTGGATCAACCTCTATGTCCATCAAGATTATTACAGAAAATTCAAAATGATAATCAACAAATAAAAATAGCTAGCAAGACAGCATCATGCAACCGCTGCATGAGGAGACTAGCACCTGCTTAACACTCATTTTTAAGGTGTCTTCCTAGAAAAGGAAGTGAATTTACACAAAAATAAGTAATGCTAATAATAATACCCTAACGGTAGTTCTGGTCCAATACACTCTGGCATTCGAATCCCATTATTATCCCCCCTTATCAAAGTCGTTATGTAAAATTACTTCCATTCCTCCAAAGAGCTTTTTCATAGTTGTTTCATTCTACATTATGAGAATTTCACGTGTTTTGTCAGGCTAGAATATTCAACTGTTACAATGGCTTA…	2802	A	G
isotig02677	TTGCGACAAAGTTTTGAACTGGATCAACCTCTATGTCCATCAAGATTATTACAGAAAATTCAAAATGATAATCAACAAATAAAAATAGCTAGCAAGACAGCATCATGCAACCGCTGCATGAGGAGACTAGCACCTGCTTAACACTCATTTTTAAGGTGTCTTCCTAGAAAAGGAAGTGAATTTACACAAAAATAAGTAATGCTAATAATAATACCCTAACGGTAGTTCTGGTCCAATACACTCTGGCATTCGAATCCCATTATTATCCCCCCTTATCAAAGTCGTTATGTAAAATTACTTCCATTCCTCCAAAGAGCTTTTTCATAGTTGTTTCATTCTACATTATGAGAATTTCACGTGTTTTGTCAGGCTAGAATATTCAACTGTTACAATGGCTTA…	2854	T	G
isotig02677	TTGCGACAAAGTTTTGAACTGGATCAACCTCTATGTCCATCAAGATTATTACAGAAAATTCAAAATGATAATCAACAAATAAAAATAGCTAGCAAGACAGCATCATGCAACCGCTGCATGAGGAGACTAGCACCTGCTTAACACTCATTTTTAAGGTGTCTTCCTAGAAAAGGAAGTGAATTTACACAAAAATAAGTAATGCTAATAATAATACCCTAACGGTAGTTCTGGTCCAATACACTCTGGCATTCGAATCCCATTATTATCCCCCCTTATCAAAGTCGTTATGTAAAATTACTTCCATTCCTCCAAAGAGCTTTTTCATAGTTGTTTCATTCTACATTATGAGAATTTCACGTGTTTTGTCAGGCTAGAATATTCAACTGTTACAATGGCTTA…	2880	C	T
isotig02677	TTGCGACAAAGTTTTGAACTGGATCAACCTCTATGTCCATCAAGATTATTACAGAAAATTCAAAATGATAATCAACAAATAAAAATAGCTAGCAAGACAGCATCATGCAACCGCTGCATGAGGAGACTAGCACCTGCTTAACACTCATTTTTAAGGTGTCTTCCTAGAAAAGGAAGTGAATTTACACAAAAATAAGTAATGCTAATAATAATACCCTAACGGTAGTTCTGGTCCAATACACTCTGGCATTCGAATCCCATTATTATCCCCCCTTATCAAAGTCGTTATGTAAAATTACTTCCATTCCTCCAAAGAGCTTTTTCATAGTTGTTTCATTCTACATTATGAGAATTTCACGTGTTTTGTCAGGCTAGAATATTCAACTGTTACAATGGCTTA…	2898	T	G
isotig02677	TTGCGACAAAGTTTTGAACTGGATCAACCTCTATGTCCATCAAGATTATTACAGAAAATTCAAAATGATAATCAACAAATAAAAATAGCTAGCAAGACAGCATCATGCAACCGCTGCATGAGGAGACTAGCACCTGCTTAACACTCATTTTTAAGGTGTCTTCCTAGAAAAGGAAGTGAATTTACACAAAAATAAGTAATGCTAATAATAATACCCTAACGGTAGTTCTGGTCCAATACACTCTGGCATTCGAATCCCATTATTATCCCCCCTTATCAAAGTCGTTATGTAAAATTACTTCCATTCCTCCAAAGAGCTTTTTCATAGTTGTTTCATTCTACATTATGAGAATTTCACGTGTTTTGTCAGGCTAGAATATTCAACTGTTACAATGGCTTA…	2904	C	A
isotig02677	TTGCGACAAAGTTTTGAACTGGATCAACCTCTATGTCCATCAAGATTATTACAGAAAATTCAAAATGATAATCAACAAATAAAAATAGCTAGCAAGACAGCATCATGCAACCGCTGCATGAGGAGACTAGCACCTGCTTAACACTCATTTTTAAGGTGTCTTCCTAGAAAAGGAAGTGAATTTACACAAAAATAAGTAATGCTAATAATAATACCCTAACGGTAGTTCTGGTCCAATACACTCTGGCATTCGAATCCCATTATTATCCCCCCTTATCAAAGTCGTTATGTAAAATTACTTCCATTCCTCCAAAGAGCTTTTTCATAGTTGTTTCATTCTACATTATGAGAATTTCACGTGTTTTGTCAGGCTAGAATATTCAACTGTTACAATGGCTTA…	2933	T	G
isotig02677	TTGCGACAAAGTTTTGAACTGGATCAACCTCTATGTCCATCAAGATTATTACAGAAAATTCAAAATGATAATCAACAAATAAAAATAGCTAGCAAGACAGCATCATGCAACCGCTGCATGAGGAGACTAGCACCTGCTTAACACTCATTTTTAAGGTGTCTTCCTAGAAAAGGAAGTGAATTTACACAAAAATAAGTAATGCTAATAATAATACCCTAACGGTAGTTCTGGTCCAATACACTCTGGCATTCGAATCCCATTATTATCCCCCCTTATCAAAGTCGTTATGTAAAATTACTTCCATTCCTCCAAAGAGCTTTTTCATAGTTGTTTCATTCTACATTATGAGAATTTCACGTGTTTTGTCAGGCTAGAATATTCAACTGTTACAATGGCTTA…	2952	G	A
isotig02677	TTGCGACAAAGTTTTGAACTGGATCAACCTCTATGTCCATCAAGATTATTACAGAAAATTCAAAATGATAATCAACAAATAAAAATAGCTAGCAAGACAGCATCATGCAACCGCTGCATGAGGAGACTAGCACCTGCTTAACACTCATTTTTAAGGTGTCTTCCTAGAAAAGGAAGTGAATTTACACAAAAATAAGTAATGCTAATAATAATACCCTAACGGTAGTTCTGGTCCAATACACTCTGGCATTCGAATCCCATTATTATCCCCCCTTATCAAAGTCGTTATGTAAAATTACTTCCATTCCTCCAAAGAGCTTTTTCATAGTTGTTTCATTCTACATTATGAGAATTTCACGTGTTTTGTCAGGCTAGAATATTCAACTGTTACAATGGCTTA…	2973	C	T
isotig02677	TTGCGACAAAGTTTTGAACTGGATCAACCTCTATGTCCATCAAGATTATTACAGAAAATTCAAAATGATAATCAACAAATAAAAATAGCTAGCAAGACAGCATCATGCAACCGCTGCATGAGGAGACTAGCACCTGCTTAACACTCATTTTTAAGGTGTCTTCCTAGAAAAGGAAGTGAATTTACACAAAAATAAGTAATGCTAATAATAATACCCTAACGGTAGTTCTGGTCCAATACACTCTGGCATTCGAATCCCATTATTATCCCCCCTTATCAAAGTCGTTATGTAAAATTACTTCCATTCCTCCAAAGAGCTTTTTCATAGTTGTTTCATTCTACATTATGAGAATTTCACGTGTTTTGTCAGGCTAGAATATTCAACTGTTACAATGGCTTA…	2976	T	C
isotig02677	TTGCGACAAAGTTTTGAACTGGATCAACCTCTATGTCCATCAAGATTATTACAGAAAATTCAAAATGATAATCAACAAATAAAAATAGCTAGCAAGACAGCATCATGCAACCGCTGCATGAGGAGACTAGCACCTGCTTAACACTCATTTTTAAGGTGTCTTCCTAGAAAAGGAAGTGAATTTACACAAAAATAAGTAATGCTAATAATAATACCCTAACGGTAGTTCTGGTCCAATACACTCTGGCATTCGAATCCCATTATTATCCCCCCTTATCAAAGTCGTTATGTAAAATTACTTCCATTCCTCCAAAGAGCTTTTTCATAGTTGTTTCATTCTACATTATGAGAATTTCACGTGTTTTGTCAGGCTAGAATATTCAACTGTTACAATGGCTTA…	2985	A	G
isotig02677	TTGCGACAAAGTTTTGAACTGGATCAACCTCTATGTCCATCAAGATTATTACAGAAAATTCAAAATGATAATCAACAAATAAAAATAGCTAGCAAGACAGCATCATGCAACCGCTGCATGAGGAGACTAGCACCTGCTTAACACTCATTTTTAAGGTGTCTTCCTAGAAAAGGAAGTGAATTTACACAAAAATAAGTAATGCTAATAATAATACCCTAACGGTAGTTCTGGTCCAATACACTCTGGCATTCGAATCCCATTATTATCCCCCCTTATCAAAGTCGTTATGTAAAATTACTTCCATTCCTCCAAAGAGCTTTTTCATAGTTGTTTCATTCTACATTATGAGAATTTCACGTGTTTTGTCAGGCTAGAATATTCAACTGTTACAATGGCTTA…	3013	T	G
isotig02677	TTGCGACAAAGTTTTGAACTGGATCAACCTCTATGTCCATCAAGATTATTACAGAAAATTCAAAATGATAATCAACAAATAAAAATAGCTAGCAAGACAGCATCATGCAACCGCTGCATGAGGAGACTAGCACCTGCTTAACACTCATTTTTAAGGTGTCTTCCTAGAAAAGGAAGTGAATTTACACAAAAATAAGTAATGCTAATAATAATACCCTAACGGTAGTTCTGGTCCAATACACTCTGGCATTCGAATCCCATTATTATCCCCCCTTATCAAAGTCGTTATGTAAAATTACTTCCATTCCTCCAAAGAGCTTTTTCATAGTTGTTTCATTCTACATTATGAGAATTTCACGTGTTTTGTCAGGCTAGAATATTCAACTGTTACAATGGCTTA…	3014	G	A
isotig02677	TTGCGACAAAGTTTTGAACTGGATCAACCTCTATGTCCATCAAGATTATTACAGAAAATTCAAAATGATAATCAACAAATAAAAATAGCTAGCAAGACAGCATCATGCAACCGCTGCATGAGGAGACTAGCACCTGCTTAACACTCATTTTTAAGGTGTCTTCCTAGAAAAGGAAGTGAATTTACACAAAAATAAGTAATGCTAATAATAATACCCTAACGGTAGTTCTGGTCCAATACACTCTGGCATTCGAATCCCATTATTATCCCCCCTTATCAAAGTCGTTATGTAAAATTACTTCCATTCCTCCAAAGAGCTTTTTCATAGTTGTTTCATTCTACATTATGAGAATTTCACGTGTTTTGTCAGGCTAGAATATTCAACTGTTACAATGGCTTA…	3019	C	T
isotig02677	TTGCGACAAAGTTTTGAACTGGATCAACCTCTATGTCCATCAAGATTATTACAGAAAATTCAAAATGATAATCAACAAATAAAAATAGCTAGCAAGACAGCATCATGCAACCGCTGCATGAGGAGACTAGCACCTGCTTAACACTCATTTTTAAGGTGTCTTCCTAGAAAAGGAAGTGAATTTACACAAAAATAAGTAATGCTAATAATAATACCCTAACGGTAGTTCTGGTCCAATACACTCTGGCATTCGAATCCCATTATTATCCCCCCTTATCAAAGTCGTTATGTAAAATTACTTCCATTCCTCCAAAGAGCTTTTTCATAGTTGTTTCATTCTACATTATGAGAATTTCACGTGTTTTGTCAGGCTAGAATATTCAACTGTTACAATGGCTTA…	3029	G	T
isotig02677	TTGCGACAAAGTTTTGAACTGGATCAACCTCTATGTCCATCAAGATTATTACAGAAAATTCAAAATGATAATCAACAAATAAAAATAGCTAGCAAGACAGCATCATGCAACCGCTGCATGAGGAGACTAGCACCTGCTTAACACTCATTTTTAAGGTGTCTTCCTAGAAAAGGAAGTGAATTTACACAAAAATAAGTAATGCTAATAATAATACCCTAACGGTAGTTCTGGTCCAATACACTCTGGCATTCGAATCCCATTATTATCCCCCCTTATCAAAGTCGTTATGTAAAATTACTTCCATTCCTCCAAAGAGCTTTTTCATAGTTGTTTCATTCTACATTATGAGAATTTCACGTGTTTTGTCAGGCTAGAATATTCAACTGTTACAATGGCTTA…	3035	T	C
isotig02677	TTGCGACAAAGTTTTGAACTGGATCAACCTCTATGTCCATCAAGATTATTACAGAAAATTCAAAATGATAATCAACAAATAAAAATAGCTAGCAAGACAGCATCATGCAACCGCTGCATGAGGAGACTAGCACCTGCTTAACACTCATTTTTAAGGTGTCTTCCTAGAAAAGGAAGTGAATTTACACAAAAATAAGTAATGCTAATAATAATACCCTAACGGTAGTTCTGGTCCAATACACTCTGGCATTCGAATCCCATTATTATCCCCCCTTATCAAAGTCGTTATGTAAAATTACTTCCATTCCTCCAAAGAGCTTTTTCATAGTTGTTTCATTCTACATTATGAGAATTTCACGTGTTTTGTCAGGCTAGAATATTCAACTGTTACAATGGCTTA…	3036	C	T
isotig02677	TTGCGACAAAGTTTTGAACTGGATCAACCTCTATGTCCATCAAGATTATTACAGAAAATTCAAAATGATAATCAACAAATAAAAATAGCTAGCAAGACAGCATCATGCAACCGCTGCATGAGGAGACTAGCACCTGCTTAACACTCATTTTTAAGGTGTCTTCCTAGAAAAGGAAGTGAATTTACACAAAAATAAGTAATGCTAATAATAATACCCTAACGGTAGTTCTGGTCCAATACACTCTGGCATTCGAATCCCATTATTATCCCCCCTTATCAAAGTCGTTATGTAAAATTACTTCCATTCCTCCAAAGAGCTTTTTCATAGTTGTTTCATTCTACATTATGAGAATTTCACGTGTTTTGTCAGGCTAGAATATTCAACTGTTACAATGGCTTA…	3054	C	G
isotig02677	TTGCGACAAAGTTTTGAACTGGATCAACCTCTATGTCCATCAAGATTATTACAGAAAATTCAAAATGATAATCAACAAATAAAAATAGCTAGCAAGACAGCATCATGCAACCGCTGCATGAGGAGACTAGCACCTGCTTAACACTCATTTTTAAGGTGTCTTCCTAGAAAAGGAAGTGAATTTACACAAAAATAAGTAATGCTAATAATAATACCCTAACGGTAGTTCTGGTCCAATACACTCTGGCATTCGAATCCCATTATTATCCCCCCTTATCAAAGTCGTTATGTAAAATTACTTCCATTCCTCCAAAGAGCTTTTTCATAGTTGTTTCATTCTACATTATGAGAATTTCACGTGTTTTGTCAGGCTAGAATATTCAACTGTTACAATGGCTTA…	3077	A	G
isotig02677	TTGCGACAAAGTTTTGAACTGGATCAACCTCTATGTCCATCAAGATTATTACAGAAAATTCAAAATGATAATCAACAAATAAAAATAGCTAGCAAGACAGCATCATGCAACCGCTGCATGAGGAGACTAGCACCTGCTTAACACTCATTTTTAAGGTGTCTTCCTAGAAAAGGAAGTGAATTTACACAAAAATAAGTAATGCTAATAATAATACCCTAACGGTAGTTCTGGTCCAATACACTCTGGCATTCGAATCCCATTATTATCCCCCCTTATCAAAGTCGTTATGTAAAATTACTTCCATTCCTCCAAAGAGCTTTTTCATAGTTGTTTCATTCTACATTATGAGAATTTCACGTGTTTTGTCAGGCTAGAATATTCAACTGTTACAATGGCTTA…	3461	T	G
isotig02677	TTGCGACAAAGTTTTGAACTGGATCAACCTCTATGTCCATCAAGATTATTACAGAAAATTCAAAATGATAATCAACAAATAAAAATAGCTAGCAAGACAGCATCATGCAACCGCTGCATGAGGAGACTAGCACCTGCTTAACACTCATTTTTAAGGTGTCTTCCTAGAAAAGGAAGTGAATTTACACAAAAATAAGTAATGCTAATAATAATACCCTAACGGTAGTTCTGGTCCAATACACTCTGGCATTCGAATCCCATTATTATCCCCCCTTATCAAAGTCGTTATGTAAAATTACTTCCATTCCTCCAAAGAGCTTTTTCATAGTTGTTTCATTCTACATTATGAGAATTTCACGTGTTTTGTCAGGCTAGAATATTCAACTGTTACAATGGCTTA…	3662	G	A
isotig02677	TTGCGACAAAGTTTTGAACTGGATCAACCTCTATGTCCATCAAGATTATTACAGAAAATTCAAAATGATAATCAACAAATAAAAATAGCTAGCAAGACAGCATCATGCAACCGCTGCATGAGGAGACTAGCACCTGCTTAACACTCATTTTTAAGGTGTCTTCCTAGAAAAGGAAGTGAATTTACACAAAAATAAGTAATGCTAATAATAATACCCTAACGGTAGTTCTGGTCCAATACACTCTGGCATTCGAATCCCATTATTATCCCCCCTTATCAAAGTCGTTATGTAAAATTACTTCCATTCCTCCAAAGAGCTTTTTCATAGTTGTTTCATTCTACATTATGAGAATTTCACGTGTTTTGTCAGGCTAGAATATTCAACTGTTACAATGGCTTA…	3664	T	G
isotig02708	ATGATCTTGGGGATAGCTCAGGAGAATATTCTTTGAAAAAATGGGAGAGCCTGGAAGGCCAGATGAGAAACGGTGCTCACCGAACCGACACAGCCTCTTGGACAGCACGTACGGAAAGGCACAAGGACGACAGTGCCAGCGCACTCTTTTATTCCTTGTCTCAAGCTGAGTCCTGCAAATTAGTTTGTTTTTCAAGCTACAAACACAAAAGCTGGCCTGGTGGAGTCGGCTACACAGATTCACAGACGAAGTAATGTAGTTTATAGGTTGGTAAGAAAGGCCTACAGTTTCCATGAGCTGAACAACGATTATTTTATCATTCCAAGGCAGTTCTAAGGAGGTCGTGTGTTCCAGCCCTACTACGATCTTTATGGTCAACGGTTTCTTTTCTCCAAGGTC…	139	G	A
isotig02708	ATGATCTTGGGGATAGCTCAGGAGAATATTCTTTGAAAAAATGGGAGAGCCTGGAAGGCCAGATGAGAAACGGTGCTCACCGAACCGACACAGCCTCTTGGACAGCACGTACGGAAAGGCACAAGGACGACAGTGCCAGCGCACTCTTTTATTCCTTGTCTCAAGCTGAGTCCTGCAAATTAGTTTGTTTTTCAAGCTACAAACACAAAAGCTGGCCTGGTGGAGTCGGCTACACAGATTCACAGACGAAGTAATGTAGTTTATAGGTTGGTAAGAAAGGCCTACAGTTTCCATGAGCTGAACAACGATTATTTTATCATTCCAAGGCAGTTCTAAGGAGGTCGTGTGTTCCAGCCCTACTACGATCTTTATGGTCAACGGTTTCTTTTCTCCAAGGTC…	293	A	G
isotig02708	ATGATCTTGGGGATAGCTCAGGAGAATATTCTTTGAAAAAATGGGAGAGCCTGGAAGGCCAGATGAGAAACGGTGCTCACCGAACCGACACAGCCTCTTGGACAGCACGTACGGAAAGGCACAAGGACGACAGTGCCAGCGCACTCTTTTATTCCTTGTCTCAAGCTGAGTCCTGCAAATTAGTTTGTTTTTCAAGCTACAAACACAAAAGCTGGCCTGGTGGAGTCGGCTACACAGATTCACAGACGAAGTAATGTAGTTTATAGGTTGGTAAGAAAGGCCTACAGTTTCCATGAGCTGAACAACGATTATTTTATCATTCCAAGGCAGTTCTAAGGAGGTCGTGTGTTCCAGCCCTACTACGATCTTTATGGTCAACGGTTTCTTTTCTCCAAGGTC…	381	G	A
isotig02708	ATGATCTTGGGGATAGCTCAGGAGAATATTCTTTGAAAAAATGGGAGAGCCTGGAAGGCCAGATGAGAAACGGTGCTCACCGAACCGACACAGCCTCTTGGACAGCACGTACGGAAAGGCACAAGGACGACAGTGCCAGCGCACTCTTTTATTCCTTGTCTCAAGCTGAGTCCTGCAAATTAGTTTGTTTTTCAAGCTACAAACACAAAAGCTGGCCTGGTGGAGTCGGCTACACAGATTCACAGACGAAGTAATGTAGTTTATAGGTTGGTAAGAAAGGCCTACAGTTTCCATGAGCTGAACAACGATTATTTTATCATTCCAAGGCAGTTCTAAGGAGGTCGTGTGTTCCAGCCCTACTACGATCTTTATGGTCAACGGTTTCTTTTCTCCAAGGTC…	399	C	G
isotig02708	ATGATCTTGGGGATAGCTCAGGAGAATATTCTTTGAAAAAATGGGAGAGCCTGGAAGGCCAGATGAGAAACGGTGCTCACCGAACCGACACAGCCTCTTGGACAGCACGTACGGAAAGGCACAAGGACGACAGTGCCAGCGCACTCTTTTATTCCTTGTCTCAAGCTGAGTCCTGCAAATTAGTTTGTTTTTCAAGCTACAAACACAAAAGCTGGCCTGGTGGAGTCGGCTACACAGATTCACAGACGAAGTAATGTAGTTTATAGGTTGGTAAGAAAGGCCTACAGTTTCCATGAGCTGAACAACGATTATTTTATCATTCCAAGGCAGTTCTAAGGAGGTCGTGTGTTCCAGCCCTACTACGATCTTTATGGTCAACGGTTTCTTTTCTCCAAGGTC…	410	A	G
isotig02708	ATGATCTTGGGGATAGCTCAGGAGAATATTCTTTGAAAAAATGGGAGAGCCTGGAAGGCCAGATGAGAAACGGTGCTCACCGAACCGACACAGCCTCTTGGACAGCACGTACGGAAAGGCACAAGGACGACAGTGCCAGCGCACTCTTTTATTCCTTGTCTCAAGCTGAGTCCTGCAAATTAGTTTGTTTTTCAAGCTACAAACACAAAAGCTGGCCTGGTGGAGTCGGCTACACAGATTCACAGACGAAGTAATGTAGTTTATAGGTTGGTAAGAAAGGCCTACAGTTTCCATGAGCTGAACAACGATTATTTTATCATTCCAAGGCAGTTCTAAGGAGGTCGTGTGTTCCAGCCCTACTACGATCTTTATGGTCAACGGTTTCTTTTCTCCAAGGTC…	480	G	A
isotig02708	ATGATCTTGGGGATAGCTCAGGAGAATATTCTTTGAAAAAATGGGAGAGCCTGGAAGGCCAGATGAGAAACGGTGCTCACCGAACCGACACAGCCTCTTGGACAGCACGTACGGAAAGGCACAAGGACGACAGTGCCAGCGCACTCTTTTATTCCTTGTCTCAAGCTGAGTCCTGCAAATTAGTTTGTTTTTCAAGCTACAAACACAAAAGCTGGCCTGGTGGAGTCGGCTACACAGATTCACAGACGAAGTAATGTAGTTTATAGGTTGGTAAGAAAGGCCTACAGTTTCCATGAGCTGAACAACGATTATTTTATCATTCCAAGGCAGTTCTAAGGAGGTCGTGTGTTCCAGCCCTACTACGATCTTTATGGTCAACGGTTTCTTTTCTCCAAGGTC…	1460	A	G
isotig02708	ATGATCTTGGGGATAGCTCAGGAGAATATTCTTTGAAAAAATGGGAGAGCCTGGAAGGCCAGATGAGAAACGGTGCTCACCGAACCGACACAGCCTCTTGGACAGCACGTACGGAAAGGCACAAGGACGACAGTGCCAGCGCACTCTTTTATTCCTTGTCTCAAGCTGAGTCCTGCAAATTAGTTTGTTTTTCAAGCTACAAACACAAAAGCTGGCCTGGTGGAGTCGGCTACACAGATTCACAGACGAAGTAATGTAGTTTATAGGTTGGTAAGAAAGGCCTACAGTTTCCATGAGCTGAACAACGATTATTTTATCATTCCAAGGCAGTTCTAAGGAGGTCGTGTGTTCCAGCCCTACTACGATCTTTATGGTCAACGGTTTCTTTTCTCCAAGGTC…	2378	T	A
isotig02708	ATGATCTTGGGGATAGCTCAGGAGAATATTCTTTGAAAAAATGGGAGAGCCTGGAAGGCCAGATGAGAAACGGTGCTCACCGAACCGACACAGCCTCTTGGACAGCACGTACGGAAAGGCACAAGGACGACAGTGCCAGCGCACTCTTTTATTCCTTGTCTCAAGCTGAGTCCTGCAAATTAGTTTGTTTTTCAAGCTACAAACACAAAAGCTGGCCTGGTGGAGTCGGCTACACAGATTCACAGACGAAGTAATGTAGTTTATAGGTTGGTAAGAAAGGCCTACAGTTTCCATGAGCTGAACAACGATTATTTTATCATTCCAAGGCAGTTCTAAGGAGGTCGTGTGTTCCAGCCCTACTACGATCTTTATGGTCAACGGTTTCTTTTCTCCAAGGTC…	2423	T	C
isotig02736	CCAATGAGTTGTATATATGGAAGGGGGTTTAACGCATATTCTTCTTTGGAAGTGAGCCCAAGTGGAGCGAGAAGGCAAGCAAGCACTTGCAGGCTCCAGTAGCGGCGGCAGGAGGAGATCCGGAAGGATTATATACGTGAACATGGTGAGGATTAGTGTTTTGAACGATGCACTTAGGAGCATGTATAATGCAGAAAAGCGTGGGAAGCGGCAAGTGATGATCAGACCATCATCAAAAGTCATCATCAAGTTCCTCCAAGTCATGCAAAAGCATGGTTATATTGGAGAGTTTGAGCTAGTTGATGATCATAGAGCAGGGAAAATTGTTGTCGAGCTTAATGGAAGGCTCAACAAATGTGGAGTTATCAGTCCTCGTTTTAATATCGGGGTGAAAGAAAT…	623	A	T
isotig02736	CCAATGAGTTGTATATATGGAAGGGGGTTTAACGCATATTCTTCTTTGGAAGTGAGCCCAAGTGGAGCGAGAAGGCAAGCAAGCACTTGCAGGCTCCAGTAGCGGCGGCAGGAGGAGATCCGGAAGGATTATATACGTGAACATGGTGAGGATTAGTGTTTTGAACGATGCACTTAGGAGCATGTATAATGCAGAAAAGCGTGGGAAGCGGCAAGTGATGATCAGACCATCATCAAAAGTCATCATCAAGTTCCTCCAAGTCATGCAAAAGCATGGTTATATTGGAGAGTTTGAGCTAGTTGATGATCATAGAGCAGGGAAAATTGTTGTCGAGCTTAATGGAAGGCTCAACAAATGTGGAGTTATCAGTCCTCGTTTTAATATCGGGGTGAAAGAAAT…	643	A	T
isotig02736	CCAATGAGTTGTATATATGGAAGGGGGTTTAACGCATATTCTTCTTTGGAAGTGAGCCCAAGTGGAGCGAGAAGGCAAGCAAGCACTTGCAGGCTCCAGTAGCGGCGGCAGGAGGAGATCCGGAAGGATTATATACGTGAACATGGTGAGGATTAGTGTTTTGAACGATGCACTTAGGAGCATGTATAATGCAGAAAAGCGTGGGAAGCGGCAAGTGATGATCAGACCATCATCAAAAGTCATCATCAAGTTCCTCCAAGTCATGCAAAAGCATGGTTATATTGGAGAGTTTGAGCTAGTTGATGATCATAGAGCAGGGAAAATTGTTGTCGAGCTTAATGGAAGGCTCAACAAATGTGGAGTTATCAGTCCTCGTTTTAATATCGGGGTGAAAGAAAT…	675	A	G
isotig02736	CCAATGAGTTGTATATATGGAAGGGGGTTTAACGCATATTCTTCTTTGGAAGTGAGCCCAAGTGGAGCGAGAAGGCAAGCAAGCACTTGCAGGCTCCAGTAGCGGCGGCAGGAGGAGATCCGGAAGGATTATATACGTGAACATGGTGAGGATTAGTGTTTTGAACGATGCACTTAGGAGCATGTATAATGCAGAAAAGCGTGGGAAGCGGCAAGTGATGATCAGACCATCATCAAAAGTCATCATCAAGTTCCTCCAAGTCATGCAAAAGCATGGTTATATTGGAGAGTTTGAGCTAGTTGATGATCATAGAGCAGGGAAAATTGTTGTCGAGCTTAATGGAAGGCTCAACAAATGTGGAGTTATCAGTCCTCGTTTTAATATCGGGGTGAAAGAAAT…	680	C	T
isotig02736	CCAATGAGTTGTATATATGGAAGGGGGTTTAACGCATATTCTTCTTTGGAAGTGAGCCCAAGTGGAGCGAGAAGGCAAGCAAGCACTTGCAGGCTCCAGTAGCGGCGGCAGGAGGAGATCCGGAAGGATTATATACGTGAACATGGTGAGGATTAGTGTTTTGAACGATGCACTTAGGAGCATGTATAATGCAGAAAAGCGTGGGAAGCGGCAAGTGATGATCAGACCATCATCAAAAGTCATCATCAAGTTCCTCCAAGTCATGCAAAAGCATGGTTATATTGGAGAGTTTGAGCTAGTTGATGATCATAGAGCAGGGAAAATTGTTGTCGAGCTTAATGGAAGGCTCAACAAATGTGGAGTTATCAGTCCTCGTTTTAATATCGGGGTGAAAGAAAT…	681	T	G
isotig02736	CCAATGAGTTGTATATATGGAAGGGGGTTTAACGCATATTCTTCTTTGGAAGTGAGCCCAAGTGGAGCGAGAAGGCAAGCAAGCACTTGCAGGCTCCAGTAGCGGCGGCAGGAGGAGATCCGGAAGGATTATATACGTGAACATGGTGAGGATTAGTGTTTTGAACGATGCACTTAGGAGCATGTATAATGCAGAAAAGCGTGGGAAGCGGCAAGTGATGATCAGACCATCATCAAAAGTCATCATCAAGTTCCTCCAAGTCATGCAAAAGCATGGTTATATTGGAGAGTTTGAGCTAGTTGATGATCATAGAGCAGGGAAAATTGTTGTCGAGCTTAATGGAAGGCTCAACAAATGTGGAGTTATCAGTCCTCGTTTTAATATCGGGGTGAAAGAAAT…	731	T	C
isotig02736	CCAATGAGTTGTATATATGGAAGGGGGTTTAACGCATATTCTTCTTTGGAAGTGAGCCCAAGTGGAGCGAGAAGGCAAGCAAGCACTTGCAGGCTCCAGTAGCGGCGGCAGGAGGAGATCCGGAAGGATTATATACGTGAACATGGTGAGGATTAGTGTTTTGAACGATGCACTTAGGAGCATGTATAATGCAGAAAAGCGTGGGAAGCGGCAAGTGATGATCAGACCATCATCAAAAGTCATCATCAAGTTCCTCCAAGTCATGCAAAAGCATGGTTATATTGGAGAGTTTGAGCTAGTTGATGATCATAGAGCAGGGAAAATTGTTGTCGAGCTTAATGGAAGGCTCAACAAATGTGGAGTTATCAGTCCTCGTTTTAATATCGGGGTGAAAGAAAT…	732	T	A
isotig02769	GATAAAATGGACGGCTAAAATAAAGGCGTCGTTAGGGTTTTTAGATTTGATAAAAACCCCCGATCGAGACCTAAATTTGTTCTTCTGTTTGGGACGAAGGCTGTAAGGAGCGGAAGGCTGTAAGGAGCGGAGGATTCGGCGTGCGCTGCAACAATGGGTAAGGGAACGGGAAGTTTTGGTAAGAGGAGAAATAAGACCCACACTCTATGTATACGGTGTGGTCGCCGCAGTTTTCATATCCAGAAGAGTAGATGTTCTGCATGTGCTTACCCATCAAAGCGCATCCGTAAATACAACTGGAGTGTCAAGGCTATTCGGAGAAAGACTACTGGAACAGGACGAATGAGATACCTGCGTCACATGCCTCGTCGTTTCAAGAATAATTTCCGGGAGGGGACC…	1288	A	G
isotig02769	GATAAAATGGACGGCTAAAATAAAGGCGTCGTTAGGGTTTTTAGATTTGATAAAAACCCCCGATCGAGACCTAAATTTGTTCTTCTGTTTGGGACGAAGGCTGTAAGGAGCGGAAGGCTGTAAGGAGCGGAGGATTCGGCGTGCGCTGCAACAATGGGTAAGGGAACGGGAAGTTTTGGTAAGAGGAGAAATAAGACCCACACTCTATGTATACGGTGTGGTCGCCGCAGTTTTCATATCCAGAAGAGTAGATGTTCTGCATGTGCTTACCCATCAAAGCGCATCCGTAAATACAACTGGAGTGTCAAGGCTATTCGGAGAAAGACTACTGGAACAGGACGAATGAGATACCTGCGTCACATGCCTCGTCGTTTCAAGAATAATTTCCGGGAGGGGACC…	1294	G	A
isotig02769	GATAAAATGGACGGCTAAAATAAAGGCGTCGTTAGGGTTTTTAGATTTGATAAAAACCCCCGATCGAGACCTAAATTTGTTCTTCTGTTTGGGACGAAGGCTGTAAGGAGCGGAAGGCTGTAAGGAGCGGAGGATTCGGCGTGCGCTGCAACAATGGGTAAGGGAACGGGAAGTTTTGGTAAGAGGAGAAATAAGACCCACACTCTATGTATACGGTGTGGTCGCCGCAGTTTTCATATCCAGAAGAGTAGATGTTCTGCATGTGCTTACCCATCAAAGCGCATCCGTAAATACAACTGGAGTGTCAAGGCTATTCGGAGAAAGACTACTGGAACAGGACGAATGAGATACCTGCGTCACATGCCTCGTCGTTTCAAGAATAATTTCCGGGAGGGGACC…	1368	C	T
isotig02769	GATAAAATGGACGGCTAAAATAAAGGCGTCGTTAGGGTTTTTAGATTTGATAAAAACCCCCGATCGAGACCTAAATTTGTTCTTCTGTTTGGGACGAAGGCTGTAAGGAGCGGAAGGCTGTAAGGAGCGGAGGATTCGGCGTGCGCTGCAACAATGGGTAAGGGAACGGGAAGTTTTGGTAAGAGGAGAAATAAGACCCACACTCTATGTATACGGTGTGGTCGCCGCAGTTTTCATATCCAGAAGAGTAGATGTTCTGCATGTGCTTACCCATCAAAGCGCATCCGTAAATACAACTGGAGTGTCAAGGCTATTCGGAGAAAGACTACTGGAACAGGACGAATGAGATACCTGCGTCACATGCCTCGTCGTTTCAAGAATAATTTCCGGGAGGGGACC…	2008	C	T
isotig02769	GATAAAATGGACGGCTAAAATAAAGGCGTCGTTAGGGTTTTTAGATTTGATAAAAACCCCCGATCGAGACCTAAATTTGTTCTTCTGTTTGGGACGAAGGCTGTAAGGAGCGGAAGGCTGTAAGGAGCGGAGGATTCGGCGTGCGCTGCAACAATGGGTAAGGGAACGGGAAGTTTTGGTAAGAGGAGAAATAAGACCCACACTCTATGTATACGGTGTGGTCGCCGCAGTTTTCATATCCAGAAGAGTAGATGTTCTGCATGTGCTTACCCATCAAAGCGCATCCGTAAATACAACTGGAGTGTCAAGGCTATTCGGAGAAAGACTACTGGAACAGGACGAATGAGATACCTGCGTCACATGCCTCGTCGTTTCAAGAATAATTTCCGGGAGGGGACC…	2017	G	T
isotig02769	GATAAAATGGACGGCTAAAATAAAGGCGTCGTTAGGGTTTTTAGATTTGATAAAAACCCCCGATCGAGACCTAAATTTGTTCTTCTGTTTGGGACGAAGGCTGTAAGGAGCGGAAGGCTGTAAGGAGCGGAGGATTCGGCGTGCGCTGCAACAATGGGTAAGGGAACGGGAAGTTTTGGTAAGAGGAGAAATAAGACCCACACTCTATGTATACGGTGTGGTCGCCGCAGTTTTCATATCCAGAAGAGTAGATGTTCTGCATGTGCTTACCCATCAAAGCGCATCCGTAAATACAACTGGAGTGTCAAGGCTATTCGGAGAAAGACTACTGGAACAGGACGAATGAGATACCTGCGTCACATGCCTCGTCGTTTCAAGAATAATTTCCGGGAGGGGACC…	2248	C	T
isotig02865	CATATGACCATTTTATTCAGGGACAGTTCCATCACTGCCATCAAAAACCGGGCTACACAATTAGCTTGTTTTTCTATTGTTACACTCGTCAAGTTGTGTACCACAACCATAAAAGGAAAGGTCTTTATAATATTCCACTACAAGAAAACTAACTTGACCGATTCTAGATCAATTTGAAATGGCCAAGATCTCTGCAGATATTTGGACTGGCAACCATCCTAGCTTGAAAACAGGTTGCACAAAGCCGTAAAAAATAAGCTATCATAAATAGAGTTATTACATGCACAAGGTGCTTAAAACCCTCCATCTCACATCCCTTTACAAGGAGGATGCACAAATTGCAATATTATTTTATTGTGAATTACACCAGGGAATTCCTAGTATGATGAACTTGATTGC…	69	T	C
isotig02865	CATATGACCATTTTATTCAGGGACAGTTCCATCACTGCCATCAAAAACCGGGCTACACAATTAGCTTGTTTTTCTATTGTTACACTCGTCAAGTTGTGTACCACAACCATAAAAGGAAAGGTCTTTATAATATTCCACTACAAGAAAACTAACTTGACCGATTCTAGATCAATTTGAAATGGCCAAGATCTCTGCAGATATTTGGACTGGCAACCATCCTAGCTTGAAAACAGGTTGCACAAAGCCGTAAAAAATAAGCTATCATAAATAGAGTTATTACATGCACAAGGTGCTTAAAACCCTCCATCTCACATCCCTTTACAAGGAGGATGCACAAATTGCAATATTATTTTATTGTGAATTACACCAGGGAATTCCTAGTATGATGAACTTGATTGC…	218	C	G
isotig02865	CATATGACCATTTTATTCAGGGACAGTTCCATCACTGCCATCAAAAACCGGGCTACACAATTAGCTTGTTTTTCTATTGTTACACTCGTCAAGTTGTGTACCACAACCATAAAAGGAAAGGTCTTTATAATATTCCACTACAAGAAAACTAACTTGACCGATTCTAGATCAATTTGAAATGGCCAAGATCTCTGCAGATATTTGGACTGGCAACCATCCTAGCTTGAAAACAGGTTGCACAAAGCCGTAAAAAATAAGCTATCATAAATAGAGTTATTACATGCACAAGGTGCTTAAAACCCTCCATCTCACATCCCTTTACAAGGAGGATGCACAAATTGCAATATTATTTTATTGTGAATTACACCAGGGAATTCCTAGTATGATGAACTTGATTGC…	415	T	C
isotig02865	CATATGACCATTTTATTCAGGGACAGTTCCATCACTGCCATCAAAAACCGGGCTACACAATTAGCTTGTTTTTCTATTGTTACACTCGTCAAGTTGTGTACCACAACCATAAAAGGAAAGGTCTTTATAATATTCCACTACAAGAAAACTAACTTGACCGATTCTAGATCAATTTGAAATGGCCAAGATCTCTGCAGATATTTGGACTGGCAACCATCCTAGCTTGAAAACAGGTTGCACAAAGCCGTAAAAAATAAGCTATCATAAATAGAGTTATTACATGCACAAGGTGCTTAAAACCCTCCATCTCACATCCCTTTACAAGGAGGATGCACAAATTGCAATATTATTTTATTGTGAATTACACCAGGGAATTCCTAGTATGATGAACTTGATTGC…	829	A	G
isotig02865	CATATGACCATTTTATTCAGGGACAGTTCCATCACTGCCATCAAAAACCGGGCTACACAATTAGCTTGTTTTTCTATTGTTACACTCGTCAAGTTGTGTACCACAACCATAAAAGGAAAGGTCTTTATAATATTCCACTACAAGAAAACTAACTTGACCGATTCTAGATCAATTTGAAATGGCCAAGATCTCTGCAGATATTTGGACTGGCAACCATCCTAGCTTGAAAACAGGTTGCACAAAGCCGTAAAAAATAAGCTATCATAAATAGAGTTATTACATGCACAAGGTGCTTAAAACCCTCCATCTCACATCCCTTTACAAGGAGGATGCACAAATTGCAATATTATTTTATTGTGAATTACACCAGGGAATTCCTAGTATGATGAACTTGATTGC…	923	T	G
isotig02865	CATATGACCATTTTATTCAGGGACAGTTCCATCACTGCCATCAAAAACCGGGCTACACAATTAGCTTGTTTTTCTATTGTTACACTCGTCAAGTTGTGTACCACAACCATAAAAGGAAAGGTCTTTATAATATTCCACTACAAGAAAACTAACTTGACCGATTCTAGATCAATTTGAAATGGCCAAGATCTCTGCAGATATTTGGACTGGCAACCATCCTAGCTTGAAAACAGGTTGCACAAAGCCGTAAAAAATAAGCTATCATAAATAGAGTTATTACATGCACAAGGTGCTTAAAACCCTCCATCTCACATCCCTTTACAAGGAGGATGCACAAATTGCAATATTATTTTATTGTGAATTACACCAGGGAATTCCTAGTATGATGAACTTGATTGC…	994	C	T
isotig02865	CATATGACCATTTTATTCAGGGACAGTTCCATCACTGCCATCAAAAACCGGGCTACACAATTAGCTTGTTTTTCTATTGTTACACTCGTCAAGTTGTGTACCACAACCATAAAAGGAAAGGTCTTTATAATATTCCACTACAAGAAAACTAACTTGACCGATTCTAGATCAATTTGAAATGGCCAAGATCTCTGCAGATATTTGGACTGGCAACCATCCTAGCTTGAAAACAGGTTGCACAAAGCCGTAAAAAATAAGCTATCATAAATAGAGTTATTACATGCACAAGGTGCTTAAAACCCTCCATCTCACATCCCTTTACAAGGAGGATGCACAAATTGCAATATTATTTTATTGTGAATTACACCAGGGAATTCCTAGTATGATGAACTTGATTGC…	1258	G	A
isotig02865	CATATGACCATTTTATTCAGGGACAGTTCCATCACTGCCATCAAAAACCGGGCTACACAATTAGCTTGTTTTTCTATTGTTACACTCGTCAAGTTGTGTACCACAACCATAAAAGGAAAGGTCTTTATAATATTCCACTACAAGAAAACTAACTTGACCGATTCTAGATCAATTTGAAATGGCCAAGATCTCTGCAGATATTTGGACTGGCAACCATCCTAGCTTGAAAACAGGTTGCACAAAGCCGTAAAAAATAAGCTATCATAAATAGAGTTATTACATGCACAAGGTGCTTAAAACCCTCCATCTCACATCCCTTTACAAGGAGGATGCACAAATTGCAATATTATTTTATTGTGAATTACACCAGGGAATTCCTAGTATGATGAACTTGATTGC…	1307	T	C
isotig02865	CATATGACCATTTTATTCAGGGACAGTTCCATCACTGCCATCAAAAACCGGGCTACACAATTAGCTTGTTTTTCTATTGTTACACTCGTCAAGTTGTGTACCACAACCATAAAAGGAAAGGTCTTTATAATATTCCACTACAAGAAAACTAACTTGACCGATTCTAGATCAATTTGAAATGGCCAAGATCTCTGCAGATATTTGGACTGGCAACCATCCTAGCTTGAAAACAGGTTGCACAAAGCCGTAAAAAATAAGCTATCATAAATAGAGTTATTACATGCACAAGGTGCTTAAAACCCTCCATCTCACATCCCTTTACAAGGAGGATGCACAAATTGCAATATTATTTTATTGTGAATTACACCAGGGAATTCCTAGTATGATGAACTTGATTGC…	1336	G	T
isotig02865	CATATGACCATTTTATTCAGGGACAGTTCCATCACTGCCATCAAAAACCGGGCTACACAATTAGCTTGTTTTTCTATTGTTACACTCGTCAAGTTGTGTACCACAACCATAAAAGGAAAGGTCTTTATAATATTCCACTACAAGAAAACTAACTTGACCGATTCTAGATCAATTTGAAATGGCCAAGATCTCTGCAGATATTTGGACTGGCAACCATCCTAGCTTGAAAACAGGTTGCACAAAGCCGTAAAAAATAAGCTATCATAAATAGAGTTATTACATGCACAAGGTGCTTAAAACCCTCCATCTCACATCCCTTTACAAGGAGGATGCACAAATTGCAATATTATTTTATTGTGAATTACACCAGGGAATTCCTAGTATGATGAACTTGATTGC…	1810	G	C
isotig02865	CATATGACCATTTTATTCAGGGACAGTTCCATCACTGCCATCAAAAACCGGGCTACACAATTAGCTTGTTTTTCTATTGTTACACTCGTCAAGTTGTGTACCACAACCATAAAAGGAAAGGTCTTTATAATATTCCACTACAAGAAAACTAACTTGACCGATTCTAGATCAATTTGAAATGGCCAAGATCTCTGCAGATATTTGGACTGGCAACCATCCTAGCTTGAAAACAGGTTGCACAAAGCCGTAAAAAATAAGCTATCATAAATAGAGTTATTACATGCACAAGGTGCTTAAAACCCTCCATCTCACATCCCTTTACAAGGAGGATGCACAAATTGCAATATTATTTTATTGTGAATTACACCAGGGAATTCCTAGTATGATGAACTTGATTGC…	1830	C	T
isotig02865	CATATGACCATTTTATTCAGGGACAGTTCCATCACTGCCATCAAAAACCGGGCTACACAATTAGCTTGTTTTTCTATTGTTACACTCGTCAAGTTGTGTACCACAACCATAAAAGGAAAGGTCTTTATAATATTCCACTACAAGAAAACTAACTTGACCGATTCTAGATCAATTTGAAATGGCCAAGATCTCTGCAGATATTTGGACTGGCAACCATCCTAGCTTGAAAACAGGTTGCACAAAGCCGTAAAAAATAAGCTATCATAAATAGAGTTATTACATGCACAAGGTGCTTAAAACCCTCCATCTCACATCCCTTTACAAGGAGGATGCACAAATTGCAATATTATTTTATTGTGAATTACACCAGGGAATTCCTAGTATGATGAACTTGATTGC…	1874	A	G
isotig02865	CATATGACCATTTTATTCAGGGACAGTTCCATCACTGCCATCAAAAACCGGGCTACACAATTAGCTTGTTTTTCTATTGTTACACTCGTCAAGTTGTGTACCACAACCATAAAAGGAAAGGTCTTTATAATATTCCACTACAAGAAAACTAACTTGACCGATTCTAGATCAATTTGAAATGGCCAAGATCTCTGCAGATATTTGGACTGGCAACCATCCTAGCTTGAAAACAGGTTGCACAAAGCCGTAAAAAATAAGCTATCATAAATAGAGTTATTACATGCACAAGGTGCTTAAAACCCTCCATCTCACATCCCTTTACAAGGAGGATGCACAAATTGCAATATTATTTTATTGTGAATTACACCAGGGAATTCCTAGTATGATGAACTTGATTGC…	1984	G	A
isotig02865	CATATGACCATTTTATTCAGGGACAGTTCCATCACTGCCATCAAAAACCGGGCTACACAATTAGCTTGTTTTTCTATTGTTACACTCGTCAAGTTGTGTACCACAACCATAAAAGGAAAGGTCTTTATAATATTCCACTACAAGAAAACTAACTTGACCGATTCTAGATCAATTTGAAATGGCCAAGATCTCTGCAGATATTTGGACTGGCAACCATCCTAGCTTGAAAACAGGTTGCACAAAGCCGTAAAAAATAAGCTATCATAAATAGAGTTATTACATGCACAAGGTGCTTAAAACCCTCCATCTCACATCCCTTTACAAGGAGGATGCACAAATTGCAATATTATTTTATTGTGAATTACACCAGGGAATTCCTAGTATGATGAACTTGATTGC…	2058	T	C
isotig02865	CATATGACCATTTTATTCAGGGACAGTTCCATCACTGCCATCAAAAACCGGGCTACACAATTAGCTTGTTTTTCTATTGTTACACTCGTCAAGTTGTGTACCACAACCATAAAAGGAAAGGTCTTTATAATATTCCACTACAAGAAAACTAACTTGACCGATTCTAGATCAATTTGAAATGGCCAAGATCTCTGCAGATATTTGGACTGGCAACCATCCTAGCTTGAAAACAGGTTGCACAAAGCCGTAAAAAATAAGCTATCATAAATAGAGTTATTACATGCACAAGGTGCTTAAAACCCTCCATCTCACATCCCTTTACAAGGAGGATGCACAAATTGCAATATTATTTTATTGTGAATTACACCAGGGAATTCCTAGTATGATGAACTTGATTGC…	2066	C	T
isotig02865	CATATGACCATTTTATTCAGGGACAGTTCCATCACTGCCATCAAAAACCGGGCTACACAATTAGCTTGTTTTTCTATTGTTACACTCGTCAAGTTGTGTACCACAACCATAAAAGGAAAGGTCTTTATAATATTCCACTACAAGAAAACTAACTTGACCGATTCTAGATCAATTTGAAATGGCCAAGATCTCTGCAGATATTTGGACTGGCAACCATCCTAGCTTGAAAACAGGTTGCACAAAGCCGTAAAAAATAAGCTATCATAAATAGAGTTATTACATGCACAAGGTGCTTAAAACCCTCCATCTCACATCCCTTTACAAGGAGGATGCACAAATTGCAATATTATTTTATTGTGAATTACACCAGGGAATTCCTAGTATGATGAACTTGATTGC…	2080	C	T
isotig02865	CATATGACCATTTTATTCAGGGACAGTTCCATCACTGCCATCAAAAACCGGGCTACACAATTAGCTTGTTTTTCTATTGTTACACTCGTCAAGTTGTGTACCACAACCATAAAAGGAAAGGTCTTTATAATATTCCACTACAAGAAAACTAACTTGACCGATTCTAGATCAATTTGAAATGGCCAAGATCTCTGCAGATATTTGGACTGGCAACCATCCTAGCTTGAAAACAGGTTGCACAAAGCCGTAAAAAATAAGCTATCATAAATAGAGTTATTACATGCACAAGGTGCTTAAAACCCTCCATCTCACATCCCTTTACAAGGAGGATGCACAAATTGCAATATTATTTTATTGTGAATTACACCAGGGAATTCCTAGTATGATGAACTTGATTGC…	2090	T	C
isotig02923	GGGTTCTGAAAAAACAAGTGATGTGTATTAAGGAAAAACATCGTTACTCAAAAAAATTCTTTGACATCTTTCTTAACTCTGTCAATAAATGGCCTCATGGATTTCCAAACCATTAACGAAAAAAGCAAAAGCCAAGTTGGATAGACATTATGTTTTGGTCAATCCATTTAGACATCAGCTTATCAGAGAAGTGGGTTTACAATGAGACCAAAATATCTAAGCAGCTGTTACTAACAAAAGAATATGGATAGACATTAGAAACTCGACTCAATACATCGGTTATTATTGTGAATAACGAATTTCTCCATGATCAATGAAACTGGTATATGACAAAACCACTATTTTCTGATGCCCATGTACCTCTATGTGAATTTGAGACATTAAATCCCATACGATAAC…	118	G	C
isotig02923	GGGTTCTGAAAAAACAAGTGATGTGTATTAAGGAAAAACATCGTTACTCAAAAAAATTCTTTGACATCTTTCTTAACTCTGTCAATAAATGGCCTCATGGATTTCCAAACCATTAACGAAAAAAGCAAAAGCCAAGTTGGATAGACATTATGTTTTGGTCAATCCATTTAGACATCAGCTTATCAGAGAAGTGGGTTTACAATGAGACCAAAATATCTAAGCAGCTGTTACTAACAAAAGAATATGGATAGACATTAGAAACTCGACTCAATACATCGGTTATTATTGTGAATAACGAATTTCTCCATGATCAATGAAACTGGTATATGACAAAACCACTATTTTCTGATGCCCATGTACCTCTATGTGAATTTGAGACATTAAATCCCATACGATAAC…	148	T	C
isotig02923	GGGTTCTGAAAAAACAAGTGATGTGTATTAAGGAAAAACATCGTTACTCAAAAAAATTCTTTGACATCTTTCTTAACTCTGTCAATAAATGGCCTCATGGATTTCCAAACCATTAACGAAAAAAGCAAAAGCCAAGTTGGATAGACATTATGTTTTGGTCAATCCATTTAGACATCAGCTTATCAGAGAAGTGGGTTTACAATGAGACCAAAATATCTAAGCAGCTGTTACTAACAAAAGAATATGGATAGACATTAGAAACTCGACTCAATACATCGGTTATTATTGTGAATAACGAATTTCTCCATGATCAATGAAACTGGTATATGACAAAACCACTATTTTCTGATGCCCATGTACCTCTATGTGAATTTGAGACATTAAATCCCATACGATAAC…	164	C	A
isotig02923	GGGTTCTGAAAAAACAAGTGATGTGTATTAAGGAAAAACATCGTTACTCAAAAAAATTCTTTGACATCTTTCTTAACTCTGTCAATAAATGGCCTCATGGATTTCCAAACCATTAACGAAAAAAGCAAAAGCCAAGTTGGATAGACATTATGTTTTGGTCAATCCATTTAGACATCAGCTTATCAGAGAAGTGGGTTTACAATGAGACCAAAATATCTAAGCAGCTGTTACTAACAAAAGAATATGGATAGACATTAGAAACTCGACTCAATACATCGGTTATTATTGTGAATAACGAATTTCTCCATGATCAATGAAACTGGTATATGACAAAACCACTATTTTCTGATGCCCATGTACCTCTATGTGAATTTGAGACATTAAATCCCATACGATAAC…	199	A	G
isotig02923	GGGTTCTGAAAAAACAAGTGATGTGTATTAAGGAAAAACATCGTTACTCAAAAAAATTCTTTGACATCTTTCTTAACTCTGTCAATAAATGGCCTCATGGATTTCCAAACCATTAACGAAAAAAGCAAAAGCCAAGTTGGATAGACATTATGTTTTGGTCAATCCATTTAGACATCAGCTTATCAGAGAAGTGGGTTTACAATGAGACCAAAATATCTAAGCAGCTGTTACTAACAAAAGAATATGGATAGACATTAGAAACTCGACTCAATACATCGGTTATTATTGTGAATAACGAATTTCTCCATGATCAATGAAACTGGTATATGACAAAACCACTATTTTCTGATGCCCATGTACCTCTATGTGAATTTGAGACATTAAATCCCATACGATAAC…	222	C	A
isotig02923	GGGTTCTGAAAAAACAAGTGATGTGTATTAAGGAAAAACATCGTTACTCAAAAAAATTCTTTGACATCTTTCTTAACTCTGTCAATAAATGGCCTCATGGATTTCCAAACCATTAACGAAAAAAGCAAAAGCCAAGTTGGATAGACATTATGTTTTGGTCAATCCATTTAGACATCAGCTTATCAGAGAAGTGGGTTTACAATGAGACCAAAATATCTAAGCAGCTGTTACTAACAAAAGAATATGGATAGACATTAGAAACTCGACTCAATACATCGGTTATTATTGTGAATAACGAATTTCTCCATGATCAATGAAACTGGTATATGACAAAACCACTATTTTCTGATGCCCATGTACCTCTATGTGAATTTGAGACATTAAATCCCATACGATAAC…	246	G	A
isotig02923	GGGTTCTGAAAAAACAAGTGATGTGTATTAAGGAAAAACATCGTTACTCAAAAAAATTCTTTGACATCTTTCTTAACTCTGTCAATAAATGGCCTCATGGATTTCCAAACCATTAACGAAAAAAGCAAAAGCCAAGTTGGATAGACATTATGTTTTGGTCAATCCATTTAGACATCAGCTTATCAGAGAAGTGGGTTTACAATGAGACCAAAATATCTAAGCAGCTGTTACTAACAAAAGAATATGGATAGACATTAGAAACTCGACTCAATACATCGGTTATTATTGTGAATAACGAATTTCTCCATGATCAATGAAACTGGTATATGACAAAACCACTATTTTCTGATGCCCATGTACCTCTATGTGAATTTGAGACATTAAATCCCATACGATAAC…	253	C	T
isotig02923	GGGTTCTGAAAAAACAAGTGATGTGTATTAAGGAAAAACATCGTTACTCAAAAAAATTCTTTGACATCTTTCTTAACTCTGTCAATAAATGGCCTCATGGATTTCCAAACCATTAACGAAAAAAGCAAAAGCCAAGTTGGATAGACATTATGTTTTGGTCAATCCATTTAGACATCAGCTTATCAGAGAAGTGGGTTTACAATGAGACCAAAATATCTAAGCAGCTGTTACTAACAAAAGAATATGGATAGACATTAGAAACTCGACTCAATACATCGGTTATTATTGTGAATAACGAATTTCTCCATGATCAATGAAACTGGTATATGACAAAACCACTATTTTCTGATGCCCATGTACCTCTATGTGAATTTGAGACATTAAATCCCATACGATAAC…	325	A	G
isotig02923	GGGTTCTGAAAAAACAAGTGATGTGTATTAAGGAAAAACATCGTTACTCAAAAAAATTCTTTGACATCTTTCTTAACTCTGTCAATAAATGGCCTCATGGATTTCCAAACCATTAACGAAAAAAGCAAAAGCCAAGTTGGATAGACATTATGTTTTGGTCAATCCATTTAGACATCAGCTTATCAGAGAAGTGGGTTTACAATGAGACCAAAATATCTAAGCAGCTGTTACTAACAAAAGAATATGGATAGACATTAGAAACTCGACTCAATACATCGGTTATTATTGTGAATAACGAATTTCTCCATGATCAATGAAACTGGTATATGACAAAACCACTATTTTCTGATGCCCATGTACCTCTATGTGAATTTGAGACATTAAATCCCATACGATAAC…	341	A	G
isotig02923	GGGTTCTGAAAAAACAAGTGATGTGTATTAAGGAAAAACATCGTTACTCAAAAAAATTCTTTGACATCTTTCTTAACTCTGTCAATAAATGGCCTCATGGATTTCCAAACCATTAACGAAAAAAGCAAAAGCCAAGTTGGATAGACATTATGTTTTGGTCAATCCATTTAGACATCAGCTTATCAGAGAAGTGGGTTTACAATGAGACCAAAATATCTAAGCAGCTGTTACTAACAAAAGAATATGGATAGACATTAGAAACTCGACTCAATACATCGGTTATTATTGTGAATAACGAATTTCTCCATGATCAATGAAACTGGTATATGACAAAACCACTATTTTCTGATGCCCATGTACCTCTATGTGAATTTGAGACATTAAATCCCATACGATAAC…	438	T	C
isotig02923	GGGTTCTGAAAAAACAAGTGATGTGTATTAAGGAAAAACATCGTTACTCAAAAAAATTCTTTGACATCTTTCTTAACTCTGTCAATAAATGGCCTCATGGATTTCCAAACCATTAACGAAAAAAGCAAAAGCCAAGTTGGATAGACATTATGTTTTGGTCAATCCATTTAGACATCAGCTTATCAGAGAAGTGGGTTTACAATGAGACCAAAATATCTAAGCAGCTGTTACTAACAAAAGAATATGGATAGACATTAGAAACTCGACTCAATACATCGGTTATTATTGTGAATAACGAATTTCTCCATGATCAATGAAACTGGTATATGACAAAACCACTATTTTCTGATGCCCATGTACCTCTATGTGAATTTGAGACATTAAATCCCATACGATAAC…	944	C	T
isotig02923	GGGTTCTGAAAAAACAAGTGATGTGTATTAAGGAAAAACATCGTTACTCAAAAAAATTCTTTGACATCTTTCTTAACTCTGTCAATAAATGGCCTCATGGATTTCCAAACCATTAACGAAAAAAGCAAAAGCCAAGTTGGATAGACATTATGTTTTGGTCAATCCATTTAGACATCAGCTTATCAGAGAAGTGGGTTTACAATGAGACCAAAATATCTAAGCAGCTGTTACTAACAAAAGAATATGGATAGACATTAGAAACTCGACTCAATACATCGGTTATTATTGTGAATAACGAATTTCTCCATGATCAATGAAACTGGTATATGACAAAACCACTATTTTCTGATGCCCATGTACCTCTATGTGAATTTGAGACATTAAATCCCATACGATAAC…	948	T	G
isotig02923	GGGTTCTGAAAAAACAAGTGATGTGTATTAAGGAAAAACATCGTTACTCAAAAAAATTCTTTGACATCTTTCTTAACTCTGTCAATAAATGGCCTCATGGATTTCCAAACCATTAACGAAAAAAGCAAAAGCCAAGTTGGATAGACATTATGTTTTGGTCAATCCATTTAGACATCAGCTTATCAGAGAAGTGGGTTTACAATGAGACCAAAATATCTAAGCAGCTGTTACTAACAAAAGAATATGGATAGACATTAGAAACTCGACTCAATACATCGGTTATTATTGTGAATAACGAATTTCTCCATGATCAATGAAACTGGTATATGACAAAACCACTATTTTCTGATGCCCATGTACCTCTATGTGAATTTGAGACATTAAATCCCATACGATAAC…	954	C	T
isotig02923	GGGTTCTGAAAAAACAAGTGATGTGTATTAAGGAAAAACATCGTTACTCAAAAAAATTCTTTGACATCTTTCTTAACTCTGTCAATAAATGGCCTCATGGATTTCCAAACCATTAACGAAAAAAGCAAAAGCCAAGTTGGATAGACATTATGTTTTGGTCAATCCATTTAGACATCAGCTTATCAGAGAAGTGGGTTTACAATGAGACCAAAATATCTAAGCAGCTGTTACTAACAAAAGAATATGGATAGACATTAGAAACTCGACTCAATACATCGGTTATTATTGTGAATAACGAATTTCTCCATGATCAATGAAACTGGTATATGACAAAACCACTATTTTCTGATGCCCATGTACCTCTATGTGAATTTGAGACATTAAATCCCATACGATAAC…	976	T	C
isotig02923	GGGTTCTGAAAAAACAAGTGATGTGTATTAAGGAAAAACATCGTTACTCAAAAAAATTCTTTGACATCTTTCTTAACTCTGTCAATAAATGGCCTCATGGATTTCCAAACCATTAACGAAAAAAGCAAAAGCCAAGTTGGATAGACATTATGTTTTGGTCAATCCATTTAGACATCAGCTTATCAGAGAAGTGGGTTTACAATGAGACCAAAATATCTAAGCAGCTGTTACTAACAAAAGAATATGGATAGACATTAGAAACTCGACTCAATACATCGGTTATTATTGTGAATAACGAATTTCTCCATGATCAATGAAACTGGTATATGACAAAACCACTATTTTCTGATGCCCATGTACCTCTATGTGAATTTGAGACATTAAATCCCATACGATAAC…	1021	T	C
isotig02963	TAACCGTATATACTGTTTGCTTAATGCACTCTATATATATATATATGCACACACAATTGTATATACACAGCAGGGTGCATAGGCGTCGCCCCAGGTGTACGGAAGTGCCCATGACCATATTCATATCAAAACTAACAGAAATAGCTCACATAAAGTATTACCATCGATTGGGTTCTAATAAATAACATATAATAAATGTGAACCATATTACCATAGCTCACACTAAGTATACCATCTATTGGGTTCTGTTCACATATGTTTTAAAAAGCTCACATTAACAGAACCTATAATAAATAAAACGTATTTTTACAGAACATGCAATAGTATGAAAAAATTCAAAATATGTTCTCAGAACAGTATTGAAATCTGCAATAGTCAACTCGCTATGCTAGCTTGAAA…	191	A	G
isotig02963	TAACCGTATATACTGTTTGCTTAATGCACTCTATATATATATATATGCACACACAATTGTATATACACAGCAGGGTGCATAGGCGTCGCCCCAGGTGTACGGAAGTGCCCATGACCATATTCATATCAAAACTAACAGAAATAGCTCACATAAAGTATTACCATCGATTGGGTTCTAATAAATAACATATAATAAATGTGAACCATATTACCATAGCTCACACTAAGTATACCATCTATTGGGTTCTGTTCACATATGTTTTAAAAAGCTCACATTAACAGAACCTATAATAAATAAAACGTATTTTTACAGAACATGCAATAGTATGAAAAAATTCAAAATATGTTCTCAGAACAGTATTGAAATCTGCAATAGTCAACTCGCTATGCTAGCTTGAAA…	275	T	C
isotig02963	TAACCGTATATACTGTTTGCTTAATGCACTCTATATATATATATATGCACACACAATTGTATATACACAGCAGGGTGCATAGGCGTCGCCCCAGGTGTACGGAAGTGCCCATGACCATATTCATATCAAAACTAACAGAAATAGCTCACATAAAGTATTACCATCGATTGGGTTCTAATAAATAACATATAATAAATGTGAACCATATTACCATAGCTCACACTAAGTATACCATCTATTGGGTTCTGTTCACATATGTTTTAAAAAGCTCACATTAACAGAACCTATAATAAATAAAACGTATTTTTACAGAACATGCAATAGTATGAAAAAATTCAAAATATGTTCTCAGAACAGTATTGAAATCTGCAATAGTCAACTCGCTATGCTAGCTTGAAA…	308	T	A
isotig02963	TAACCGTATATACTGTTTGCTTAATGCACTCTATATATATATATATGCACACACAATTGTATATACACAGCAGGGTGCATAGGCGTCGCCCCAGGTGTACGGAAGTGCCCATGACCATATTCATATCAAAACTAACAGAAATAGCTCACATAAAGTATTACCATCGATTGGGTTCTAATAAATAACATATAATAAATGTGAACCATATTACCATAGCTCACACTAAGTATACCATCTATTGGGTTCTGTTCACATATGTTTTAAAAAGCTCACATTAACAGAACCTATAATAAATAAAACGTATTTTTACAGAACATGCAATAGTATGAAAAAATTCAAAATATGTTCTCAGAACAGTATTGAAATCTGCAATAGTCAACTCGCTATGCTAGCTTGAAA…	318	G	C
isotig02963	TAACCGTATATACTGTTTGCTTAATGCACTCTATATATATATATATGCACACACAATTGTATATACACAGCAGGGTGCATAGGCGTCGCCCCAGGTGTACGGAAGTGCCCATGACCATATTCATATCAAAACTAACAGAAATAGCTCACATAAAGTATTACCATCGATTGGGTTCTAATAAATAACATATAATAAATGTGAACCATATTACCATAGCTCACACTAAGTATACCATCTATTGGGTTCTGTTCACATATGTTTTAAAAAGCTCACATTAACAGAACCTATAATAAATAAAACGTATTTTTACAGAACATGCAATAGTATGAAAAAATTCAAAATATGTTCTCAGAACAGTATTGAAATCTGCAATAGTCAACTCGCTATGCTAGCTTGAAA…	319	C	T
isotig02963	TAACCGTATATACTGTTTGCTTAATGCACTCTATATATATATATATGCACACACAATTGTATATACACAGCAGGGTGCATAGGCGTCGCCCCAGGTGTACGGAAGTGCCCATGACCATATTCATATCAAAACTAACAGAAATAGCTCACATAAAGTATTACCATCGATTGGGTTCTAATAAATAACATATAATAAATGTGAACCATATTACCATAGCTCACACTAAGTATACCATCTATTGGGTTCTGTTCACATATGTTTTAAAAAGCTCACATTAACAGAACCTATAATAAATAAAACGTATTTTTACAGAACATGCAATAGTATGAAAAAATTCAAAATATGTTCTCAGAACAGTATTGAAATCTGCAATAGTCAACTCGCTATGCTAGCTTGAAA…	352	G	A
isotig02963	TAACCGTATATACTGTTTGCTTAATGCACTCTATATATATATATATGCACACACAATTGTATATACACAGCAGGGTGCATAGGCGTCGCCCCAGGTGTACGGAAGTGCCCATGACCATATTCATATCAAAACTAACAGAAATAGCTCACATAAAGTATTACCATCGATTGGGTTCTAATAAATAACATATAATAAATGTGAACCATATTACCATAGCTCACACTAAGTATACCATCTATTGGGTTCTGTTCACATATGTTTTAAAAAGCTCACATTAACAGAACCTATAATAAATAAAACGTATTTTTACAGAACATGCAATAGTATGAAAAAATTCAAAATATGTTCTCAGAACAGTATTGAAATCTGCAATAGTCAACTCGCTATGCTAGCTTGAAA…	383	G	A
isotig02963	TAACCGTATATACTGTTTGCTTAATGCACTCTATATATATATATATGCACACACAATTGTATATACACAGCAGGGTGCATAGGCGTCGCCCCAGGTGTACGGAAGTGCCCATGACCATATTCATATCAAAACTAACAGAAATAGCTCACATAAAGTATTACCATCGATTGGGTTCTAATAAATAACATATAATAAATGTGAACCATATTACCATAGCTCACACTAAGTATACCATCTATTGGGTTCTGTTCACATATGTTTTAAAAAGCTCACATTAACAGAACCTATAATAAATAAAACGTATTTTTACAGAACATGCAATAGTATGAAAAAATTCAAAATATGTTCTCAGAACAGTATTGAAATCTGCAATAGTCAACTCGCTATGCTAGCTTGAAA…	528	C	A
isotig02963	TAACCGTATATACTGTTTGCTTAATGCACTCTATATATATATATATGCACACACAATTGTATATACACAGCAGGGTGCATAGGCGTCGCCCCAGGTGTACGGAAGTGCCCATGACCATATTCATATCAAAACTAACAGAAATAGCTCACATAAAGTATTACCATCGATTGGGTTCTAATAAATAACATATAATAAATGTGAACCATATTACCATAGCTCACACTAAGTATACCATCTATTGGGTTCTGTTCACATATGTTTTAAAAAGCTCACATTAACAGAACCTATAATAAATAAAACGTATTTTTACAGAACATGCAATAGTATGAAAAAATTCAAAATATGTTCTCAGAACAGTATTGAAATCTGCAATAGTCAACTCGCTATGCTAGCTTGAAA…	531	G	C
isotig02963	TAACCGTATATACTGTTTGCTTAATGCACTCTATATATATATATATGCACACACAATTGTATATACACAGCAGGGTGCATAGGCGTCGCCCCAGGTGTACGGAAGTGCCCATGACCATATTCATATCAAAACTAACAGAAATAGCTCACATAAAGTATTACCATCGATTGGGTTCTAATAAATAACATATAATAAATGTGAACCATATTACCATAGCTCACACTAAGTATACCATCTATTGGGTTCTGTTCACATATGTTTTAAAAAGCTCACATTAACAGAACCTATAATAAATAAAACGTATTTTTACAGAACATGCAATAGTATGAAAAAATTCAAAATATGTTCTCAGAACAGTATTGAAATCTGCAATAGTCAACTCGCTATGCTAGCTTGAAA…	620	A	G
isotig02963	TAACCGTATATACTGTTTGCTTAATGCACTCTATATATATATATATGCACACACAATTGTATATACACAGCAGGGTGCATAGGCGTCGCCCCAGGTGTACGGAAGTGCCCATGACCATATTCATATCAAAACTAACAGAAATAGCTCACATAAAGTATTACCATCGATTGGGTTCTAATAAATAACATATAATAAATGTGAACCATATTACCATAGCTCACACTAAGTATACCATCTATTGGGTTCTGTTCACATATGTTTTAAAAAGCTCACATTAACAGAACCTATAATAAATAAAACGTATTTTTACAGAACATGCAATAGTATGAAAAAATTCAAAATATGTTCTCAGAACAGTATTGAAATCTGCAATAGTCAACTCGCTATGCTAGCTTGAAA…	769	T	C
isotig02963	TAACCGTATATACTGTTTGCTTAATGCACTCTATATATATATATATGCACACACAATTGTATATACACAGCAGGGTGCATAGGCGTCGCCCCAGGTGTACGGAAGTGCCCATGACCATATTCATATCAAAACTAACAGAAATAGCTCACATAAAGTATTACCATCGATTGGGTTCTAATAAATAACATATAATAAATGTGAACCATATTACCATAGCTCACACTAAGTATACCATCTATTGGGTTCTGTTCACATATGTTTTAAAAAGCTCACATTAACAGAACCTATAATAAATAAAACGTATTTTTACAGAACATGCAATAGTATGAAAAAATTCAAAATATGTTCTCAGAACAGTATTGAAATCTGCAATAGTCAACTCGCTATGCTAGCTTGAAA…	841	T	C
isotig02963	TAACCGTATATACTGTTTGCTTAATGCACTCTATATATATATATATGCACACACAATTGTATATACACAGCAGGGTGCATAGGCGTCGCCCCAGGTGTACGGAAGTGCCCATGACCATATTCATATCAAAACTAACAGAAATAGCTCACATAAAGTATTACCATCGATTGGGTTCTAATAAATAACATATAATAAATGTGAACCATATTACCATAGCTCACACTAAGTATACCATCTATTGGGTTCTGTTCACATATGTTTTAAAAAGCTCACATTAACAGAACCTATAATAAATAAAACGTATTTTTACAGAACATGCAATAGTATGAAAAAATTCAAAATATGTTCTCAGAACAGTATTGAAATCTGCAATAGTCAACTCGCTATGCTAGCTTGAAA…	1091	A	G
isotig02963	TAACCGTATATACTGTTTGCTTAATGCACTCTATATATATATATATGCACACACAATTGTATATACACAGCAGGGTGCATAGGCGTCGCCCCAGGTGTACGGAAGTGCCCATGACCATATTCATATCAAAACTAACAGAAATAGCTCACATAAAGTATTACCATCGATTGGGTTCTAATAAATAACATATAATAAATGTGAACCATATTACCATAGCTCACACTAAGTATACCATCTATTGGGTTCTGTTCACATATGTTTTAAAAAGCTCACATTAACAGAACCTATAATAAATAAAACGTATTTTTACAGAACATGCAATAGTATGAAAAAATTCAAAATATGTTCTCAGAACAGTATTGAAATCTGCAATAGTCAACTCGCTATGCTAGCTTGAAA…	1121	G	A
isotig02963	TAACCGTATATACTGTTTGCTTAATGCACTCTATATATATATATATGCACACACAATTGTATATACACAGCAGGGTGCATAGGCGTCGCCCCAGGTGTACGGAAGTGCCCATGACCATATTCATATCAAAACTAACAGAAATAGCTCACATAAAGTATTACCATCGATTGGGTTCTAATAAATAACATATAATAAATGTGAACCATATTACCATAGCTCACACTAAGTATACCATCTATTGGGTTCTGTTCACATATGTTTTAAAAAGCTCACATTAACAGAACCTATAATAAATAAAACGTATTTTTACAGAACATGCAATAGTATGAAAAAATTCAAAATATGTTCTCAGAACAGTATTGAAATCTGCAATAGTCAACTCGCTATGCTAGCTTGAAA…	1142	T	C
isotig02963	TAACCGTATATACTGTTTGCTTAATGCACTCTATATATATATATATGCACACACAATTGTATATACACAGCAGGGTGCATAGGCGTCGCCCCAGGTGTACGGAAGTGCCCATGACCATATTCATATCAAAACTAACAGAAATAGCTCACATAAAGTATTACCATCGATTGGGTTCTAATAAATAACATATAATAAATGTGAACCATATTACCATAGCTCACACTAAGTATACCATCTATTGGGTTCTGTTCACATATGTTTTAAAAAGCTCACATTAACAGAACCTATAATAAATAAAACGTATTTTTACAGAACATGCAATAGTATGAAAAAATTCAAAATATGTTCTCAGAACAGTATTGAAATCTGCAATAGTCAACTCGCTATGCTAGCTTGAAA…	1224	G	T
isotig02963	TAACCGTATATACTGTTTGCTTAATGCACTCTATATATATATATATGCACACACAATTGTATATACACAGCAGGGTGCATAGGCGTCGCCCCAGGTGTACGGAAGTGCCCATGACCATATTCATATCAAAACTAACAGAAATAGCTCACATAAAGTATTACCATCGATTGGGTTCTAATAAATAACATATAATAAATGTGAACCATATTACCATAGCTCACACTAAGTATACCATCTATTGGGTTCTGTTCACATATGTTTTAAAAAGCTCACATTAACAGAACCTATAATAAATAAAACGTATTTTTACAGAACATGCAATAGTATGAAAAAATTCAAAATATGTTCTCAGAACAGTATTGAAATCTGCAATAGTCAACTCGCTATGCTAGCTTGAAA…	1253	G	A
isotig03092	GCTGCAAGCCTGTGGGTTCACCTTTGCTTCAACCCGGAGCGGCCAGTGTCATCTCAGAATCTGCGCAAACTCTCCCTCTCTAATGCCTTAGAAAATATTACGCCGCCATGGTCGATACGACATATATCGACCATGGCGGAAGAGATTATCATATTATCAGTAGTAAGTTGTGAGAACCGAAGCTGCAAGATTTTCTAATAAATGGCGAGTAGCGAGTTTGCAGTTCCCCATCTAAAGATTTTGGGCCGATTTGTTTACGTATTGTAGAGCAGAGAGATCCCGGTGAAGTCAAGTCCAAATTTTCGGTCCACCAGAAGAACCAGAAATGGCCGCTGCGACTAAAAAACAGGCACCACCCGCGGGATATCCAACTGGAGAGGCAAAGGAGGAAGTCCCTCA…	80	C	G
isotig03092	GCTGCAAGCCTGTGGGTTCACCTTTGCTTCAACCCGGAGCGGCCAGTGTCATCTCAGAATCTGCGCAAACTCTCCCTCTCTAATGCCTTAGAAAATATTACGCCGCCATGGTCGATACGACATATATCGACCATGGCGGAAGAGATTATCATATTATCAGTAGTAAGTTGTGAGAACCGAAGCTGCAAGATTTTCTAATAAATGGCGAGTAGCGAGTTTGCAGTTCCCCATCTAAAGATTTTGGGCCGATTTGTTTACGTATTGTAGAGCAGAGAGATCCCGGTGAAGTCAAGTCCAAATTTTCGGTCCACCAGAAGAACCAGAAATGGCCGCTGCGACTAAAAAACAGGCACCACCCGCGGGATATCCAACTGGAGAGGCAAAGGAGGAAGTCCCTCA…	129	G	A
isotig03092	GCTGCAAGCCTGTGGGTTCACCTTTGCTTCAACCCGGAGCGGCCAGTGTCATCTCAGAATCTGCGCAAACTCTCCCTCTCTAATGCCTTAGAAAATATTACGCCGCCATGGTCGATACGACATATATCGACCATGGCGGAAGAGATTATCATATTATCAGTAGTAAGTTGTGAGAACCGAAGCTGCAAGATTTTCTAATAAATGGCGAGTAGCGAGTTTGCAGTTCCCCATCTAAAGATTTTGGGCCGATTTGTTTACGTATTGTAGAGCAGAGAGATCCCGGTGAAGTCAAGTCCAAATTTTCGGTCCACCAGAAGAACCAGAAATGGCCGCTGCGACTAAAAAACAGGCACCACCCGCGGGATATCCAACTGGAGAGGCAAAGGAGGAAGTCCCTCA…	199	T	G
isotig03092	GCTGCAAGCCTGTGGGTTCACCTTTGCTTCAACCCGGAGCGGCCAGTGTCATCTCAGAATCTGCGCAAACTCTCCCTCTCTAATGCCTTAGAAAATATTACGCCGCCATGGTCGATACGACATATATCGACCATGGCGGAAGAGATTATCATATTATCAGTAGTAAGTTGTGAGAACCGAAGCTGCAAGATTTTCTAATAAATGGCGAGTAGCGAGTTTGCAGTTCCCCATCTAAAGATTTTGGGCCGATTTGTTTACGTATTGTAGAGCAGAGAGATCCCGGTGAAGTCAAGTCCAAATTTTCGGTCCACCAGAAGAACCAGAAATGGCCGCTGCGACTAAAAAACAGGCACCACCCGCGGGATATCCAACTGGAGAGGCAAAGGAGGAAGTCCCTCA…	209	G	C
isotig03092	GCTGCAAGCCTGTGGGTTCACCTTTGCTTCAACCCGGAGCGGCCAGTGTCATCTCAGAATCTGCGCAAACTCTCCCTCTCTAATGCCTTAGAAAATATTACGCCGCCATGGTCGATACGACATATATCGACCATGGCGGAAGAGATTATCATATTATCAGTAGTAAGTTGTGAGAACCGAAGCTGCAAGATTTTCTAATAAATGGCGAGTAGCGAGTTTGCAGTTCCCCATCTAAAGATTTTGGGCCGATTTGTTTACGTATTGTAGAGCAGAGAGATCCCGGTGAAGTCAAGTCCAAATTTTCGGTCCACCAGAAGAACCAGAAATGGCCGCTGCGACTAAAAAACAGGCACCACCCGCGGGATATCCAACTGGAGAGGCAAAGGAGGAAGTCCCTCA…	1025	C	G
isotig03092	GCTGCAAGCCTGTGGGTTCACCTTTGCTTCAACCCGGAGCGGCCAGTGTCATCTCAGAATCTGCGCAAACTCTCCCTCTCTAATGCCTTAGAAAATATTACGCCGCCATGGTCGATACGACATATATCGACCATGGCGGAAGAGATTATCATATTATCAGTAGTAAGTTGTGAGAACCGAAGCTGCAAGATTTTCTAATAAATGGCGAGTAGCGAGTTTGCAGTTCCCCATCTAAAGATTTTGGGCCGATTTGTTTACGTATTGTAGAGCAGAGAGATCCCGGTGAAGTCAAGTCCAAATTTTCGGTCCACCAGAAGAACCAGAAATGGCCGCTGCGACTAAAAAACAGGCACCACCCGCGGGATATCCAACTGGAGAGGCAAAGGAGGAAGTCCCTCA…	1030	T	G
isotig03092	GCTGCAAGCCTGTGGGTTCACCTTTGCTTCAACCCGGAGCGGCCAGTGTCATCTCAGAATCTGCGCAAACTCTCCCTCTCTAATGCCTTAGAAAATATTACGCCGCCATGGTCGATACGACATATATCGACCATGGCGGAAGAGATTATCATATTATCAGTAGTAAGTTGTGAGAACCGAAGCTGCAAGATTTTCTAATAAATGGCGAGTAGCGAGTTTGCAGTTCCCCATCTAAAGATTTTGGGCCGATTTGTTTACGTATTGTAGAGCAGAGAGATCCCGGTGAAGTCAAGTCCAAATTTTCGGTCCACCAGAAGAACCAGAAATGGCCGCTGCGACTAAAAAACAGGCACCACCCGCGGGATATCCAACTGGAGAGGCAAAGGAGGAAGTCCCTCA…	1089	T	C
isotig03115	AGGGTCCACTTTATATTTATTTAATATTTAATTTTTCCATAATCCCTGTAATACTTAGATTTTTTTTCCTAATCCCTTCACCCCACATTAACCCTTACATTTTCCCTAAAATGTTTAGGGTCGAAATTCGGAAATCAGAACTGATAATCAACGAAATAAATAAAGAGATCCAGCCGAATTGATGAAGAAGATCAAATATCCAGCAAAATGCTTTCTTCAAATGTTTTCTTAGCATCAATAGATTATATATACAAAAAGTTCGACAGAGTGACGCTATAATCAAAATGACAGAACCTTGACCACGATACAAAACACCATAGAGAACATGAAACCAGCCAGTAAGCCAAAACGATGGACTGATAACACCAAGCAACTAGTGAGAATTAAGTTTTCCCCTCA…	180	T	G
isotig03115	AGGGTCCACTTTATATTTATTTAATATTTAATTTTTCCATAATCCCTGTAATACTTAGATTTTTTTTCCTAATCCCTTCACCCCACATTAACCCTTACATTTTCCCTAAAATGTTTAGGGTCGAAATTCGGAAATCAGAACTGATAATCAACGAAATAAATAAAGAGATCCAGCCGAATTGATGAAGAAGATCAAATATCCAGCAAAATGCTTTCTTCAAATGTTTTCTTAGCATCAATAGATTATATATACAAAAAGTTCGACAGAGTGACGCTATAATCAAAATGACAGAACCTTGACCACGATACAAAACACCATAGAGAACATGAAACCAGCCAGTAAGCCAAAACGATGGACTGATAACACCAAGCAACTAGTGAGAATTAAGTTTTCCCCTCA…	407	A	T
isotig03115	AGGGTCCACTTTATATTTATTTAATATTTAATTTTTCCATAATCCCTGTAATACTTAGATTTTTTTTCCTAATCCCTTCACCCCACATTAACCCTTACATTTTCCCTAAAATGTTTAGGGTCGAAATTCGGAAATCAGAACTGATAATCAACGAAATAAATAAAGAGATCCAGCCGAATTGATGAAGAAGATCAAATATCCAGCAAAATGCTTTCTTCAAATGTTTTCTTAGCATCAATAGATTATATATACAAAAAGTTCGACAGAGTGACGCTATAATCAAAATGACAGAACCTTGACCACGATACAAAACACCATAGAGAACATGAAACCAGCCAGTAAGCCAAAACGATGGACTGATAACACCAAGCAACTAGTGAGAATTAAGTTTTCCCCTCA…	524	C	G
isotig03115	AGGGTCCACTTTATATTTATTTAATATTTAATTTTTCCATAATCCCTGTAATACTTAGATTTTTTTTCCTAATCCCTTCACCCCACATTAACCCTTACATTTTCCCTAAAATGTTTAGGGTCGAAATTCGGAAATCAGAACTGATAATCAACGAAATAAATAAAGAGATCCAGCCGAATTGATGAAGAAGATCAAATATCCAGCAAAATGCTTTCTTCAAATGTTTTCTTAGCATCAATAGATTATATATACAAAAAGTTCGACAGAGTGACGCTATAATCAAAATGACAGAACCTTGACCACGATACAAAACACCATAGAGAACATGAAACCAGCCAGTAAGCCAAAACGATGGACTGATAACACCAAGCAACTAGTGAGAATTAAGTTTTCCCCTCA…	533	A	G
isotig03115	AGGGTCCACTTTATATTTATTTAATATTTAATTTTTCCATAATCCCTGTAATACTTAGATTTTTTTTCCTAATCCCTTCACCCCACATTAACCCTTACATTTTCCCTAAAATGTTTAGGGTCGAAATTCGGAAATCAGAACTGATAATCAACGAAATAAATAAAGAGATCCAGCCGAATTGATGAAGAAGATCAAATATCCAGCAAAATGCTTTCTTCAAATGTTTTCTTAGCATCAATAGATTATATATACAAAAAGTTCGACAGAGTGACGCTATAATCAAAATGACAGAACCTTGACCACGATACAAAACACCATAGAGAACATGAAACCAGCCAGTAAGCCAAAACGATGGACTGATAACACCAAGCAACTAGTGAGAATTAAGTTTTCCCCTCA…	562	G	T
isotig03115	AGGGTCCACTTTATATTTATTTAATATTTAATTTTTCCATAATCCCTGTAATACTTAGATTTTTTTTCCTAATCCCTTCACCCCACATTAACCCTTACATTTTCCCTAAAATGTTTAGGGTCGAAATTCGGAAATCAGAACTGATAATCAACGAAATAAATAAAGAGATCCAGCCGAATTGATGAAGAAGATCAAATATCCAGCAAAATGCTTTCTTCAAATGTTTTCTTAGCATCAATAGATTATATATACAAAAAGTTCGACAGAGTGACGCTATAATCAAAATGACAGAACCTTGACCACGATACAAAACACCATAGAGAACATGAAACCAGCCAGTAAGCCAAAACGATGGACTGATAACACCAAGCAACTAGTGAGAATTAAGTTTTCCCCTCA…	586	G	A
isotig03115	AGGGTCCACTTTATATTTATTTAATATTTAATTTTTCCATAATCCCTGTAATACTTAGATTTTTTTTCCTAATCCCTTCACCCCACATTAACCCTTACATTTTCCCTAAAATGTTTAGGGTCGAAATTCGGAAATCAGAACTGATAATCAACGAAATAAATAAAGAGATCCAGCCGAATTGATGAAGAAGATCAAATATCCAGCAAAATGCTTTCTTCAAATGTTTTCTTAGCATCAATAGATTATATATACAAAAAGTTCGACAGAGTGACGCTATAATCAAAATGACAGAACCTTGACCACGATACAAAACACCATAGAGAACATGAAACCAGCCAGTAAGCCAAAACGATGGACTGATAACACCAAGCAACTAGTGAGAATTAAGTTTTCCCCTCA…	590	A	G
isotig03115	AGGGTCCACTTTATATTTATTTAATATTTAATTTTTCCATAATCCCTGTAATACTTAGATTTTTTTTCCTAATCCCTTCACCCCACATTAACCCTTACATTTTCCCTAAAATGTTTAGGGTCGAAATTCGGAAATCAGAACTGATAATCAACGAAATAAATAAAGAGATCCAGCCGAATTGATGAAGAAGATCAAATATCCAGCAAAATGCTTTCTTCAAATGTTTTCTTAGCATCAATAGATTATATATACAAAAAGTTCGACAGAGTGACGCTATAATCAAAATGACAGAACCTTGACCACGATACAAAACACCATAGAGAACATGAAACCAGCCAGTAAGCCAAAACGATGGACTGATAACACCAAGCAACTAGTGAGAATTAAGTTTTCCCCTCA…	593	C	T
isotig03115	AGGGTCCACTTTATATTTATTTAATATTTAATTTTTCCATAATCCCTGTAATACTTAGATTTTTTTTCCTAATCCCTTCACCCCACATTAACCCTTACATTTTCCCTAAAATGTTTAGGGTCGAAATTCGGAAATCAGAACTGATAATCAACGAAATAAATAAAGAGATCCAGCCGAATTGATGAAGAAGATCAAATATCCAGCAAAATGCTTTCTTCAAATGTTTTCTTAGCATCAATAGATTATATATACAAAAAGTTCGACAGAGTGACGCTATAATCAAAATGACAGAACCTTGACCACGATACAAAACACCATAGAGAACATGAAACCAGCCAGTAAGCCAAAACGATGGACTGATAACACCAAGCAACTAGTGAGAATTAAGTTTTCCCCTCA…	932	G	C
isotig03151	GGATAAGATATTTAGTGGTCTAATTCTCTATTTACAGACAATCTCTCCGATAAGTTTTATCCTACAATGACTCCATTGAAAATGAACTAATGAGCACTACGAGGCAAAATCTTATTGCAACGTAATTACTCAATCAAACCCACTCACATATTAACGAAAAACAATCTGCTAATAAATCCATGCACTCTTTCACTGGGTAGCAAATAGAAGCCCTGAATTTTGTCAATGTTTCACTCAAGCTTTTCTCCTGATAGAACCTGTAAGACGAATCTGAGTAAGAAATGTACAAATTGAATGATCTTGTAAATAAAAGTGCATCTCTTCGCCACTCAGATTAAGATATAGCAAAGCTTCCACTCGCAAAATAAAGATGTCTCTCAAGTTTCTCAAAACACAACA…	27	T	C
isotig03151	GGATAAGATATTTAGTGGTCTAATTCTCTATTTACAGACAATCTCTCCGATAAGTTTTATCCTACAATGACTCCATTGAAAATGAACTAATGAGCACTACGAGGCAAAATCTTATTGCAACGTAATTACTCAATCAAACCCACTCACATATTAACGAAAAACAATCTGCTAATAAATCCATGCACTCTTTCACTGGGTAGCAAATAGAAGCCCTGAATTTTGTCAATGTTTCACTCAAGCTTTTCTCCTGATAGAACCTGTAAGACGAATCTGAGTAAGAAATGTACAAATTGAATGATCTTGTAAATAAAAGTGCATCTCTTCGCCACTCAGATTAAGATATAGCAAAGCTTCCACTCGCAAAATAAAGATGTCTCTCAAGTTTCTCAAAACACAACA…	121	C	T
isotig03151	GGATAAGATATTTAGTGGTCTAATTCTCTATTTACAGACAATCTCTCCGATAAGTTTTATCCTACAATGACTCCATTGAAAATGAACTAATGAGCACTACGAGGCAAAATCTTATTGCAACGTAATTACTCAATCAAACCCACTCACATATTAACGAAAAACAATCTGCTAATAAATCCATGCACTCTTTCACTGGGTAGCAAATAGAAGCCCTGAATTTTGTCAATGTTTCACTCAAGCTTTTCTCCTGATAGAACCTGTAAGACGAATCTGAGTAAGAAATGTACAAATTGAATGATCTTGTAAATAAAAGTGCATCTCTTCGCCACTCAGATTAAGATATAGCAAAGCTTCCACTCGCAAAATAAAGATGTCTCTCAAGTTTCTCAAAACACAACA…	230	T	C
isotig03151	GGATAAGATATTTAGTGGTCTAATTCTCTATTTACAGACAATCTCTCCGATAAGTTTTATCCTACAATGACTCCATTGAAAATGAACTAATGAGCACTACGAGGCAAAATCTTATTGCAACGTAATTACTCAATCAAACCCACTCACATATTAACGAAAAACAATCTGCTAATAAATCCATGCACTCTTTCACTGGGTAGCAAATAGAAGCCCTGAATTTTGTCAATGTTTCACTCAAGCTTTTCTCCTGATAGAACCTGTAAGACGAATCTGAGTAAGAAATGTACAAATTGAATGATCTTGTAAATAAAAGTGCATCTCTTCGCCACTCAGATTAAGATATAGCAAAGCTTCCACTCGCAAAATAAAGATGTCTCTCAAGTTTCTCAAAACACAACA…	360	G	C
isotig03151	GGATAAGATATTTAGTGGTCTAATTCTCTATTTACAGACAATCTCTCCGATAAGTTTTATCCTACAATGACTCCATTGAAAATGAACTAATGAGCACTACGAGGCAAAATCTTATTGCAACGTAATTACTCAATCAAACCCACTCACATATTAACGAAAAACAATCTGCTAATAAATCCATGCACTCTTTCACTGGGTAGCAAATAGAAGCCCTGAATTTTGTCAATGTTTCACTCAAGCTTTTCTCCTGATAGAACCTGTAAGACGAATCTGAGTAAGAAATGTACAAATTGAATGATCTTGTAAATAAAAGTGCATCTCTTCGCCACTCAGATTAAGATATAGCAAAGCTTCCACTCGCAAAATAAAGATGTCTCTCAAGTTTCTCAAAACACAACA…	919	G	A
isotig03151	GGATAAGATATTTAGTGGTCTAATTCTCTATTTACAGACAATCTCTCCGATAAGTTTTATCCTACAATGACTCCATTGAAAATGAACTAATGAGCACTACGAGGCAAAATCTTATTGCAACGTAATTACTCAATCAAACCCACTCACATATTAACGAAAAACAATCTGCTAATAAATCCATGCACTCTTTCACTGGGTAGCAAATAGAAGCCCTGAATTTTGTCAATGTTTCACTCAAGCTTTTCTCCTGATAGAACCTGTAAGACGAATCTGAGTAAGAAATGTACAAATTGAATGATCTTGTAAATAAAAGTGCATCTCTTCGCCACTCAGATTAAGATATAGCAAAGCTTCCACTCGCAAAATAAAGATGTCTCTCAAGTTTCTCAAAACACAACA…	1765	C	G
isotig03151	GGATAAGATATTTAGTGGTCTAATTCTCTATTTACAGACAATCTCTCCGATAAGTTTTATCCTACAATGACTCCATTGAAAATGAACTAATGAGCACTACGAGGCAAAATCTTATTGCAACGTAATTACTCAATCAAACCCACTCACATATTAACGAAAAACAATCTGCTAATAAATCCATGCACTCTTTCACTGGGTAGCAAATAGAAGCCCTGAATTTTGTCAATGTTTCACTCAAGCTTTTCTCCTGATAGAACCTGTAAGACGAATCTGAGTAAGAAATGTACAAATTGAATGATCTTGTAAATAAAAGTGCATCTCTTCGCCACTCAGATTAAGATATAGCAAAGCTTCCACTCGCAAAATAAAGATGTCTCTCAAGTTTCTCAAAACACAACA…	1770	C	T
isotig03151	GGATAAGATATTTAGTGGTCTAATTCTCTATTTACAGACAATCTCTCCGATAAGTTTTATCCTACAATGACTCCATTGAAAATGAACTAATGAGCACTACGAGGCAAAATCTTATTGCAACGTAATTACTCAATCAAACCCACTCACATATTAACGAAAAACAATCTGCTAATAAATCCATGCACTCTTTCACTGGGTAGCAAATAGAAGCCCTGAATTTTGTCAATGTTTCACTCAAGCTTTTCTCCTGATAGAACCTGTAAGACGAATCTGAGTAAGAAATGTACAAATTGAATGATCTTGTAAATAAAAGTGCATCTCTTCGCCACTCAGATTAAGATATAGCAAAGCTTCCACTCGCAAAATAAAGATGTCTCTCAAGTTTCTCAAAACACAACA…	1852	C	T
isotig03249	CCTTTTCTCGAGCTCCTGGATAATCATTCCCAAGGTTTAGCTTTTGGGCGCCTTTCGTTCAGGAGGCCCATCGAGATCATATTGTTTTGGGTTACGTGCAAAAACAATCACGCATCATGAGGTGGCTCAATAAGATTTTTAAAGGCTCTAATCACAGGATATCAGAGGGCCAATATCAGGGAGTATTTGCAGATGAAGATAGGGTTTGGGATATGCCTTCTGGCTCTTTGAATGGGCATGCACATAGTGGAAATGAGGATTTGGATCACGCTATTGCACTTTCTCTCTCCGAGGAAGAACAAAGAAAGGCGAATAGCGGAGGGGGCAGTTCTGAAGTGGAAGATGATGAAGAACTTGCTAGAGCTCTACAAGCAAGCTTGGACATTGGCTCCCCTCCAC…	2140	T	C
isotig03249	CCTTTTCTCGAGCTCCTGGATAATCATTCCCAAGGTTTAGCTTTTGGGCGCCTTTCGTTCAGGAGGCCCATCGAGATCATATTGTTTTGGGTTACGTGCAAAAACAATCACGCATCATGAGGTGGCTCAATAAGATTTTTAAAGGCTCTAATCACAGGATATCAGAGGGCCAATATCAGGGAGTATTTGCAGATGAAGATAGGGTTTGGGATATGCCTTCTGGCTCTTTGAATGGGCATGCACATAGTGGAAATGAGGATTTGGATCACGCTATTGCACTTTCTCTCTCCGAGGAAGAACAAAGAAAGGCGAATAGCGGAGGGGGCAGTTCTGAAGTGGAAGATGATGAAGAACTTGCTAGAGCTCTACAAGCAAGCTTGGACATTGGCTCCCCTCCAC…	2168	T	A
isotig03249	CCTTTTCTCGAGCTCCTGGATAATCATTCCCAAGGTTTAGCTTTTGGGCGCCTTTCGTTCAGGAGGCCCATCGAGATCATATTGTTTTGGGTTACGTGCAAAAACAATCACGCATCATGAGGTGGCTCAATAAGATTTTTAAAGGCTCTAATCACAGGATATCAGAGGGCCAATATCAGGGAGTATTTGCAGATGAAGATAGGGTTTGGGATATGCCTTCTGGCTCTTTGAATGGGCATGCACATAGTGGAAATGAGGATTTGGATCACGCTATTGCACTTTCTCTCTCCGAGGAAGAACAAAGAAAGGCGAATAGCGGAGGGGGCAGTTCTGAAGTGGAAGATGATGAAGAACTTGCTAGAGCTCTACAAGCAAGCTTGGACATTGGCTCCCCTCCAC…	2282	G	A
isotig03284	GGTGTAATTATTACCCTTCATATAGGCTACATTAAAGAAGAATACCATGGGAAAAATTCAAAAAACCATGGGTTGGAATCCGAAAATGTTAGACAAGACATTATTACAACATCTTTGTCATACTGGGAAGTCAAAATATTACATTACATCATCACTACCATATTGGGCTGGAGAGCGCCTCTCAGCGCAATAAGAGGTTTGCACGTTGTCTTTGATCAATGATACCTCTCTATGCTTAATAGATCCAAGGTTAAAACGGATTTTCTATTAAAAAATAACAGAGACAAAGAACCTACATTTAAGTTCCAAGATAGAAAGGTGATCAGCATGCACTAAAACATGGCATGGCCCTTATAGCAAAAGCATGGCTGATATGAATCCAACCCATATGGAAATAAA…	426	A	T
isotig03284	GGTGTAATTATTACCCTTCATATAGGCTACATTAAAGAAGAATACCATGGGAAAAATTCAAAAAACCATGGGTTGGAATCCGAAAATGTTAGACAAGACATTATTACAACATCTTTGTCATACTGGGAAGTCAAAATATTACATTACATCATCACTACCATATTGGGCTGGAGAGCGCCTCTCAGCGCAATAAGAGGTTTGCACGTTGTCTTTGATCAATGATACCTCTCTATGCTTAATAGATCCAAGGTTAAAACGGATTTTCTATTAAAAAATAACAGAGACAAAGAACCTACATTTAAGTTCCAAGATAGAAAGGTGATCAGCATGCACTAAAACATGGCATGGCCCTTATAGCAAAAGCATGGCTGATATGAATCCAACCCATATGGAAATAAA…	473	T	G
isotig03284	GGTGTAATTATTACCCTTCATATAGGCTACATTAAAGAAGAATACCATGGGAAAAATTCAAAAAACCATGGGTTGGAATCCGAAAATGTTAGACAAGACATTATTACAACATCTTTGTCATACTGGGAAGTCAAAATATTACATTACATCATCACTACCATATTGGGCTGGAGAGCGCCTCTCAGCGCAATAAGAGGTTTGCACGTTGTCTTTGATCAATGATACCTCTCTATGCTTAATAGATCCAAGGTTAAAACGGATTTTCTATTAAAAAATAACAGAGACAAAGAACCTACATTTAAGTTCCAAGATAGAAAGGTGATCAGCATGCACTAAAACATGGCATGGCCCTTATAGCAAAAGCATGGCTGATATGAATCCAACCCATATGGAAATAAA…	478	A	C
isotig03284	GGTGTAATTATTACCCTTCATATAGGCTACATTAAAGAAGAATACCATGGGAAAAATTCAAAAAACCATGGGTTGGAATCCGAAAATGTTAGACAAGACATTATTACAACATCTTTGTCATACTGGGAAGTCAAAATATTACATTACATCATCACTACCATATTGGGCTGGAGAGCGCCTCTCAGCGCAATAAGAGGTTTGCACGTTGTCTTTGATCAATGATACCTCTCTATGCTTAATAGATCCAAGGTTAAAACGGATTTTCTATTAAAAAATAACAGAGACAAAGAACCTACATTTAAGTTCCAAGATAGAAAGGTGATCAGCATGCACTAAAACATGGCATGGCCCTTATAGCAAAAGCATGGCTGATATGAATCCAACCCATATGGAAATAAA…	480	A	G
isotig03284	GGTGTAATTATTACCCTTCATATAGGCTACATTAAAGAAGAATACCATGGGAAAAATTCAAAAAACCATGGGTTGGAATCCGAAAATGTTAGACAAGACATTATTACAACATCTTTGTCATACTGGGAAGTCAAAATATTACATTACATCATCACTACCATATTGGGCTGGAGAGCGCCTCTCAGCGCAATAAGAGGTTTGCACGTTGTCTTTGATCAATGATACCTCTCTATGCTTAATAGATCCAAGGTTAAAACGGATTTTCTATTAAAAAATAACAGAGACAAAGAACCTACATTTAAGTTCCAAGATAGAAAGGTGATCAGCATGCACTAAAACATGGCATGGCCCTTATAGCAAAAGCATGGCTGATATGAATCCAACCCATATGGAAATAAA…	486	C	A
isotig03284	GGTGTAATTATTACCCTTCATATAGGCTACATTAAAGAAGAATACCATGGGAAAAATTCAAAAAACCATGGGTTGGAATCCGAAAATGTTAGACAAGACATTATTACAACATCTTTGTCATACTGGGAAGTCAAAATATTACATTACATCATCACTACCATATTGGGCTGGAGAGCGCCTCTCAGCGCAATAAGAGGTTTGCACGTTGTCTTTGATCAATGATACCTCTCTATGCTTAATAGATCCAAGGTTAAAACGGATTTTCTATTAAAAAATAACAGAGACAAAGAACCTACATTTAAGTTCCAAGATAGAAAGGTGATCAGCATGCACTAAAACATGGCATGGCCCTTATAGCAAAAGCATGGCTGATATGAATCCAACCCATATGGAAATAAA…	503	T	C
isotig03284	GGTGTAATTATTACCCTTCATATAGGCTACATTAAAGAAGAATACCATGGGAAAAATTCAAAAAACCATGGGTTGGAATCCGAAAATGTTAGACAAGACATTATTACAACATCTTTGTCATACTGGGAAGTCAAAATATTACATTACATCATCACTACCATATTGGGCTGGAGAGCGCCTCTCAGCGCAATAAGAGGTTTGCACGTTGTCTTTGATCAATGATACCTCTCTATGCTTAATAGATCCAAGGTTAAAACGGATTTTCTATTAAAAAATAACAGAGACAAAGAACCTACATTTAAGTTCCAAGATAGAAAGGTGATCAGCATGCACTAAAACATGGCATGGCCCTTATAGCAAAAGCATGGCTGATATGAATCCAACCCATATGGAAATAAA…	517	T	G
isotig03284	GGTGTAATTATTACCCTTCATATAGGCTACATTAAAGAAGAATACCATGGGAAAAATTCAAAAAACCATGGGTTGGAATCCGAAAATGTTAGACAAGACATTATTACAACATCTTTGTCATACTGGGAAGTCAAAATATTACATTACATCATCACTACCATATTGGGCTGGAGAGCGCCTCTCAGCGCAATAAGAGGTTTGCACGTTGTCTTTGATCAATGATACCTCTCTATGCTTAATAGATCCAAGGTTAAAACGGATTTTCTATTAAAAAATAACAGAGACAAAGAACCTACATTTAAGTTCCAAGATAGAAAGGTGATCAGCATGCACTAAAACATGGCATGGCCCTTATAGCAAAAGCATGGCTGATATGAATCCAACCCATATGGAAATAAA…	527	T	C
isotig03284	GGTGTAATTATTACCCTTCATATAGGCTACATTAAAGAAGAATACCATGGGAAAAATTCAAAAAACCATGGGTTGGAATCCGAAAATGTTAGACAAGACATTATTACAACATCTTTGTCATACTGGGAAGTCAAAATATTACATTACATCATCACTACCATATTGGGCTGGAGAGCGCCTCTCAGCGCAATAAGAGGTTTGCACGTTGTCTTTGATCAATGATACCTCTCTATGCTTAATAGATCCAAGGTTAAAACGGATTTTCTATTAAAAAATAACAGAGACAAAGAACCTACATTTAAGTTCCAAGATAGAAAGGTGATCAGCATGCACTAAAACATGGCATGGCCCTTATAGCAAAAGCATGGCTGATATGAATCCAACCCATATGGAAATAAA…	536	G	A
isotig03284	GGTGTAATTATTACCCTTCATATAGGCTACATTAAAGAAGAATACCATGGGAAAAATTCAAAAAACCATGGGTTGGAATCCGAAAATGTTAGACAAGACATTATTACAACATCTTTGTCATACTGGGAAGTCAAAATATTACATTACATCATCACTACCATATTGGGCTGGAGAGCGCCTCTCAGCGCAATAAGAGGTTTGCACGTTGTCTTTGATCAATGATACCTCTCTATGCTTAATAGATCCAAGGTTAAAACGGATTTTCTATTAAAAAATAACAGAGACAAAGAACCTACATTTAAGTTCCAAGATAGAAAGGTGATCAGCATGCACTAAAACATGGCATGGCCCTTATAGCAAAAGCATGGCTGATATGAATCCAACCCATATGGAAATAAA…	568	C	A
isotig03284	GGTGTAATTATTACCCTTCATATAGGCTACATTAAAGAAGAATACCATGGGAAAAATTCAAAAAACCATGGGTTGGAATCCGAAAATGTTAGACAAGACATTATTACAACATCTTTGTCATACTGGGAAGTCAAAATATTACATTACATCATCACTACCATATTGGGCTGGAGAGCGCCTCTCAGCGCAATAAGAGGTTTGCACGTTGTCTTTGATCAATGATACCTCTCTATGCTTAATAGATCCAAGGTTAAAACGGATTTTCTATTAAAAAATAACAGAGACAAAGAACCTACATTTAAGTTCCAAGATAGAAAGGTGATCAGCATGCACTAAAACATGGCATGGCCCTTATAGCAAAAGCATGGCTGATATGAATCCAACCCATATGGAAATAAA…	603	T	C
isotig03284	GGTGTAATTATTACCCTTCATATAGGCTACATTAAAGAAGAATACCATGGGAAAAATTCAAAAAACCATGGGTTGGAATCCGAAAATGTTAGACAAGACATTATTACAACATCTTTGTCATACTGGGAAGTCAAAATATTACATTACATCATCACTACCATATTGGGCTGGAGAGCGCCTCTCAGCGCAATAAGAGGTTTGCACGTTGTCTTTGATCAATGATACCTCTCTATGCTTAATAGATCCAAGGTTAAAACGGATTTTCTATTAAAAAATAACAGAGACAAAGAACCTACATTTAAGTTCCAAGATAGAAAGGTGATCAGCATGCACTAAAACATGGCATGGCCCTTATAGCAAAAGCATGGCTGATATGAATCCAACCCATATGGAAATAAA…	649	T	A
isotig03284	GGTGTAATTATTACCCTTCATATAGGCTACATTAAAGAAGAATACCATGGGAAAAATTCAAAAAACCATGGGTTGGAATCCGAAAATGTTAGACAAGACATTATTACAACATCTTTGTCATACTGGGAAGTCAAAATATTACATTACATCATCACTACCATATTGGGCTGGAGAGCGCCTCTCAGCGCAATAAGAGGTTTGCACGTTGTCTTTGATCAATGATACCTCTCTATGCTTAATAGATCCAAGGTTAAAACGGATTTTCTATTAAAAAATAACAGAGACAAAGAACCTACATTTAAGTTCCAAGATAGAAAGGTGATCAGCATGCACTAAAACATGGCATGGCCCTTATAGCAAAAGCATGGCTGATATGAATCCAACCCATATGGAAATAAA…	659	A	G
isotig03284	GGTGTAATTATTACCCTTCATATAGGCTACATTAAAGAAGAATACCATGGGAAAAATTCAAAAAACCATGGGTTGGAATCCGAAAATGTTAGACAAGACATTATTACAACATCTTTGTCATACTGGGAAGTCAAAATATTACATTACATCATCACTACCATATTGGGCTGGAGAGCGCCTCTCAGCGCAATAAGAGGTTTGCACGTTGTCTTTGATCAATGATACCTCTCTATGCTTAATAGATCCAAGGTTAAAACGGATTTTCTATTAAAAAATAACAGAGACAAAGAACCTACATTTAAGTTCCAAGATAGAAAGGTGATCAGCATGCACTAAAACATGGCATGGCCCTTATAGCAAAAGCATGGCTGATATGAATCCAACCCATATGGAAATAAA…	687	T	C
isotig03284	GGTGTAATTATTACCCTTCATATAGGCTACATTAAAGAAGAATACCATGGGAAAAATTCAAAAAACCATGGGTTGGAATCCGAAAATGTTAGACAAGACATTATTACAACATCTTTGTCATACTGGGAAGTCAAAATATTACATTACATCATCACTACCATATTGGGCTGGAGAGCGCCTCTCAGCGCAATAAGAGGTTTGCACGTTGTCTTTGATCAATGATACCTCTCTATGCTTAATAGATCCAAGGTTAAAACGGATTTTCTATTAAAAAATAACAGAGACAAAGAACCTACATTTAAGTTCCAAGATAGAAAGGTGATCAGCATGCACTAAAACATGGCATGGCCCTTATAGCAAAAGCATGGCTGATATGAATCCAACCCATATGGAAATAAA…	807	A	T
isotig03284	GGTGTAATTATTACCCTTCATATAGGCTACATTAAAGAAGAATACCATGGGAAAAATTCAAAAAACCATGGGTTGGAATCCGAAAATGTTAGACAAGACATTATTACAACATCTTTGTCATACTGGGAAGTCAAAATATTACATTACATCATCACTACCATATTGGGCTGGAGAGCGCCTCTCAGCGCAATAAGAGGTTTGCACGTTGTCTTTGATCAATGATACCTCTCTATGCTTAATAGATCCAAGGTTAAAACGGATTTTCTATTAAAAAATAACAGAGACAAAGAACCTACATTTAAGTTCCAAGATAGAAAGGTGATCAGCATGCACTAAAACATGGCATGGCCCTTATAGCAAAAGCATGGCTGATATGAATCCAACCCATATGGAAATAAA…	1166	A	C
isotig03284	GGTGTAATTATTACCCTTCATATAGGCTACATTAAAGAAGAATACCATGGGAAAAATTCAAAAAACCATGGGTTGGAATCCGAAAATGTTAGACAAGACATTATTACAACATCTTTGTCATACTGGGAAGTCAAAATATTACATTACATCATCACTACCATATTGGGCTGGAGAGCGCCTCTCAGCGCAATAAGAGGTTTGCACGTTGTCTTTGATCAATGATACCTCTCTATGCTTAATAGATCCAAGGTTAAAACGGATTTTCTATTAAAAAATAACAGAGACAAAGAACCTACATTTAAGTTCCAAGATAGAAAGGTGATCAGCATGCACTAAAACATGGCATGGCCCTTATAGCAAAAGCATGGCTGATATGAATCCAACCCATATGGAAATAAA…	1193	A	G
isotig03284	GGTGTAATTATTACCCTTCATATAGGCTACATTAAAGAAGAATACCATGGGAAAAATTCAAAAAACCATGGGTTGGAATCCGAAAATGTTAGACAAGACATTATTACAACATCTTTGTCATACTGGGAAGTCAAAATATTACATTACATCATCACTACCATATTGGGCTGGAGAGCGCCTCTCAGCGCAATAAGAGGTTTGCACGTTGTCTTTGATCAATGATACCTCTCTATGCTTAATAGATCCAAGGTTAAAACGGATTTTCTATTAAAAAATAACAGAGACAAAGAACCTACATTTAAGTTCCAAGATAGAAAGGTGATCAGCATGCACTAAAACATGGCATGGCCCTTATAGCAAAAGCATGGCTGATATGAATCCAACCCATATGGAAATAAA…	1261	C	T
isotig03308	GGAGGGGAAGGAAATTGGCGGGAGTTCTGCTTTCGCGCTCAAATCCCCAATATCAATTAAGATTCGGCAGTGGCAAGCCACTATTATCATCTGAAAGACATTTCATATCAGTTGTTTCTGTTATTATTTCCCATTGTAAATTTCTTCTGTCTCCGCGGGGAGTGACAGAGTAGAGATTAAAGATGTTTGGCATGCAAAGTCAATCGGACGGAGGCTCTCTATTCTCCGGAGGCGGCTTTATGCCCTCTCAGGCCACCCAAGTTAACGAAGGTGGTTTTTCGTCTGTCAGGAAAAGCGGTACCGGCACCGGGCTTCTTCCATTGACAGTAAAACAGATAAGCCAGGCAACCCAGAAGCTTTCGGATGAGAGTTCGAATTTTACAATAGATGGCGTGGATA…	46	C	T
isotig03308	GGAGGGGAAGGAAATTGGCGGGAGTTCTGCTTTCGCGCTCAAATCCCCAATATCAATTAAGATTCGGCAGTGGCAAGCCACTATTATCATCTGAAAGACATTTCATATCAGTTGTTTCTGTTATTATTTCCCATTGTAAATTTCTTCTGTCTCCGCGGGGAGTGACAGAGTAGAGATTAAAGATGTTTGGCATGCAAAGTCAATCGGACGGAGGCTCTCTATTCTCCGGAGGCGGCTTTATGCCCTCTCAGGCCACCCAAGTTAACGAAGGTGGTTTTTCGTCTGTCAGGAAAAGCGGTACCGGCACCGGGCTTCTTCCATTGACAGTAAAACAGATAAGCCAGGCAACCCAGAAGCTTTCGGATGAGAGTTCGAATTTTACAATAGATGGCGTGGATA…	49	A	T
isotig03308	GGAGGGGAAGGAAATTGGCGGGAGTTCTGCTTTCGCGCTCAAATCCCCAATATCAATTAAGATTCGGCAGTGGCAAGCCACTATTATCATCTGAAAGACATTTCATATCAGTTGTTTCTGTTATTATTTCCCATTGTAAATTTCTTCTGTCTCCGCGGGGAGTGACAGAGTAGAGATTAAAGATGTTTGGCATGCAAAGTCAATCGGACGGAGGCTCTCTATTCTCCGGAGGCGGCTTTATGCCCTCTCAGGCCACCCAAGTTAACGAAGGTGGTTTTTCGTCTGTCAGGAAAAGCGGTACCGGCACCGGGCTTCTTCCATTGACAGTAAAACAGATAAGCCAGGCAACCCAGAAGCTTTCGGATGAGAGTTCGAATTTTACAATAGATGGCGTGGATA…	90	T	C
isotig03308	GGAGGGGAAGGAAATTGGCGGGAGTTCTGCTTTCGCGCTCAAATCCCCAATATCAATTAAGATTCGGCAGTGGCAAGCCACTATTATCATCTGAAAGACATTTCATATCAGTTGTTTCTGTTATTATTTCCCATTGTAAATTTCTTCTGTCTCCGCGGGGAGTGACAGAGTAGAGATTAAAGATGTTTGGCATGCAAAGTCAATCGGACGGAGGCTCTCTATTCTCCGGAGGCGGCTTTATGCCCTCTCAGGCCACCCAAGTTAACGAAGGTGGTTTTTCGTCTGTCAGGAAAAGCGGTACCGGCACCGGGCTTCTTCCATTGACAGTAAAACAGATAAGCCAGGCAACCCAGAAGCTTTCGGATGAGAGTTCGAATTTTACAATAGATGGCGTGGATA…	1334	C	T
isotig03308	GGAGGGGAAGGAAATTGGCGGGAGTTCTGCTTTCGCGCTCAAATCCCCAATATCAATTAAGATTCGGCAGTGGCAAGCCACTATTATCATCTGAAAGACATTTCATATCAGTTGTTTCTGTTATTATTTCCCATTGTAAATTTCTTCTGTCTCCGCGGGGAGTGACAGAGTAGAGATTAAAGATGTTTGGCATGCAAAGTCAATCGGACGGAGGCTCTCTATTCTCCGGAGGCGGCTTTATGCCCTCTCAGGCCACCCAAGTTAACGAAGGTGGTTTTTCGTCTGTCAGGAAAAGCGGTACCGGCACCGGGCTTCTTCCATTGACAGTAAAACAGATAAGCCAGGCAACCCAGAAGCTTTCGGATGAGAGTTCGAATTTTACAATAGATGGCGTGGATA…	1461	A	G
isotig03308	GGAGGGGAAGGAAATTGGCGGGAGTTCTGCTTTCGCGCTCAAATCCCCAATATCAATTAAGATTCGGCAGTGGCAAGCCACTATTATCATCTGAAAGACATTTCATATCAGTTGTTTCTGTTATTATTTCCCATTGTAAATTTCTTCTGTCTCCGCGGGGAGTGACAGAGTAGAGATTAAAGATGTTTGGCATGCAAAGTCAATCGGACGGAGGCTCTCTATTCTCCGGAGGCGGCTTTATGCCCTCTCAGGCCACCCAAGTTAACGAAGGTGGTTTTTCGTCTGTCAGGAAAAGCGGTACCGGCACCGGGCTTCTTCCATTGACAGTAAAACAGATAAGCCAGGCAACCCAGAAGCTTTCGGATGAGAGTTCGAATTTTACAATAGATGGCGTGGATA…	2761	C	T
isotig03374	GGAAAACCAGGAGTGGTTATGAAACAAGGAGGAGCCGCATCTTTTCTGCCATCATCCCAACGTTGCATACCAGCAAAGATCAATGGCGGTGATCTTTAGCGCACTGTGATGTGATTGCTCACGCACTGGTCAGTCCCAGCTGGATGGTTCCAGCGGCCTTCTGGATCACACATCCTGTTCCTTATTCTTATGGACCACGGCATCTCCCTCTCTCTCACTCACTATATAACAAGCTATTTGCAATGTAACCAAACATTCAAGCAAGGGGTACAGACATCCATTGATCCAGAGATTAGTGTGGTCTGAATCAGAGATAAGTTTGGTCTGGTCTGAATCGTTTTCAGTTTTTACACAGGGAAAAATGGAGAATTAGGTTAAAGTGTTGAACTTATGGGCCAC…	1083	A	C
isotig03374	GGAAAACCAGGAGTGGTTATGAAACAAGGAGGAGCCGCATCTTTTCTGCCATCATCCCAACGTTGCATACCAGCAAAGATCAATGGCGGTGATCTTTAGCGCACTGTGATGTGATTGCTCACGCACTGGTCAGTCCCAGCTGGATGGTTCCAGCGGCCTTCTGGATCACACATCCTGTTCCTTATTCTTATGGACCACGGCATCTCCCTCTCTCTCACTCACTATATAACAAGCTATTTGCAATGTAACCAAACATTCAAGCAAGGGGTACAGACATCCATTGATCCAGAGATTAGTGTGGTCTGAATCAGAGATAAGTTTGGTCTGGTCTGAATCGTTTTCAGTTTTTACACAGGGAAAAATGGAGAATTAGGTTAAAGTGTTGAACTTATGGGCCAC…	1239	T	A
isotig03374	GGAAAACCAGGAGTGGTTATGAAACAAGGAGGAGCCGCATCTTTTCTGCCATCATCCCAACGTTGCATACCAGCAAAGATCAATGGCGGTGATCTTTAGCGCACTGTGATGTGATTGCTCACGCACTGGTCAGTCCCAGCTGGATGGTTCCAGCGGCCTTCTGGATCACACATCCTGTTCCTTATTCTTATGGACCACGGCATCTCCCTCTCTCTCACTCACTATATAACAAGCTATTTGCAATGTAACCAAACATTCAAGCAAGGGGTACAGACATCCATTGATCCAGAGATTAGTGTGGTCTGAATCAGAGATAAGTTTGGTCTGGTCTGAATCGTTTTCAGTTTTTACACAGGGAAAAATGGAGAATTAGGTTAAAGTGTTGAACTTATGGGCCAC…	1244	G	A
isotig03374	GGAAAACCAGGAGTGGTTATGAAACAAGGAGGAGCCGCATCTTTTCTGCCATCATCCCAACGTTGCATACCAGCAAAGATCAATGGCGGTGATCTTTAGCGCACTGTGATGTGATTGCTCACGCACTGGTCAGTCCCAGCTGGATGGTTCCAGCGGCCTTCTGGATCACACATCCTGTTCCTTATTCTTATGGACCACGGCATCTCCCTCTCTCTCACTCACTATATAACAAGCTATTTGCAATGTAACCAAACATTCAAGCAAGGGGTACAGACATCCATTGATCCAGAGATTAGTGTGGTCTGAATCAGAGATAAGTTTGGTCTGGTCTGAATCGTTTTCAGTTTTTACACAGGGAAAAATGGAGAATTAGGTTAAAGTGTTGAACTTATGGGCCAC…	1250	A	C
isotig03374	GGAAAACCAGGAGTGGTTATGAAACAAGGAGGAGCCGCATCTTTTCTGCCATCATCCCAACGTTGCATACCAGCAAAGATCAATGGCGGTGATCTTTAGCGCACTGTGATGTGATTGCTCACGCACTGGTCAGTCCCAGCTGGATGGTTCCAGCGGCCTTCTGGATCACACATCCTGTTCCTTATTCTTATGGACCACGGCATCTCCCTCTCTCTCACTCACTATATAACAAGCTATTTGCAATGTAACCAAACATTCAAGCAAGGGGTACAGACATCCATTGATCCAGAGATTAGTGTGGTCTGAATCAGAGATAAGTTTGGTCTGGTCTGAATCGTTTTCAGTTTTTACACAGGGAAAAATGGAGAATTAGGTTAAAGTGTTGAACTTATGGGCCAC…	1293	T	C
isotig03374	GGAAAACCAGGAGTGGTTATGAAACAAGGAGGAGCCGCATCTTTTCTGCCATCATCCCAACGTTGCATACCAGCAAAGATCAATGGCGGTGATCTTTAGCGCACTGTGATGTGATTGCTCACGCACTGGTCAGTCCCAGCTGGATGGTTCCAGCGGCCTTCTGGATCACACATCCTGTTCCTTATTCTTATGGACCACGGCATCTCCCTCTCTCTCACTCACTATATAACAAGCTATTTGCAATGTAACCAAACATTCAAGCAAGGGGTACAGACATCCATTGATCCAGAGATTAGTGTGGTCTGAATCAGAGATAAGTTTGGTCTGGTCTGAATCGTTTTCAGTTTTTACACAGGGAAAAATGGAGAATTAGGTTAAAGTGTTGAACTTATGGGCCAC…	1321	G	A
isotig03494	TACAGGAGATTCAATGAGTTCACAACAGACGAAACAACATAGGTAGGATGAGGACGAGCTGGTTGAACCTCCCACCCAAGGTTACTTGGGAGCTGGAACGACATTTTTAGAAGCTTCCGGTTTACGAGTGAATCACGGAGCGTTTTTTATATAATATATATATTGTTTATATTTTGATGCATATATGTCAACAAAAACATGTAGAATGATGAATTAGATATAAAAAACATTTAAAACATAGATTGAACCATATAACAACAATCATCTAGAAGTTATAATCTTCATCAACCACGTCCACAAGTTAGTAACATAGTAACATACAACATATTGAGTCTCATGATTCATCAATCTTAAAGTTTCAAGCTTTCAAAATTCAATATATAACATTTATCATCATTG…	1417	G	A
isotig03494	TACAGGAGATTCAATGAGTTCACAACAGACGAAACAACATAGGTAGGATGAGGACGAGCTGGTTGAACCTCCCACCCAAGGTTACTTGGGAGCTGGAACGACATTTTTAGAAGCTTCCGGTTTACGAGTGAATCACGGAGCGTTTTTTATATAATATATATATTGTTTATATTTTGATGCATATATGTCAACAAAAACATGTAGAATGATGAATTAGATATAAAAAACATTTAAAACATAGATTGAACCATATAACAACAATCATCTAGAAGTTATAATCTTCATCAACCACGTCCACAAGTTAGTAACATAGTAACATACAACATATTGAGTCTCATGATTCATCAATCTTAAAGTTTCAAGCTTTCAAAATTCAATATATAACATTTATCATCATTG…	1419	T	A
isotig03494	TACAGGAGATTCAATGAGTTCACAACAGACGAAACAACATAGGTAGGATGAGGACGAGCTGGTTGAACCTCCCACCCAAGGTTACTTGGGAGCTGGAACGACATTTTTAGAAGCTTCCGGTTTACGAGTGAATCACGGAGCGTTTTTTATATAATATATATATTGTTTATATTTTGATGCATATATGTCAACAAAAACATGTAGAATGATGAATTAGATATAAAAAACATTTAAAACATAGATTGAACCATATAACAACAATCATCTAGAAGTTATAATCTTCATCAACCACGTCCACAAGTTAGTAACATAGTAACATACAACATATTGAGTCTCATGATTCATCAATCTTAAAGTTTCAAGCTTTCAAAATTCAATATATAACATTTATCATCATTG…	1465	T	A
isotig03494	TACAGGAGATTCAATGAGTTCACAACAGACGAAACAACATAGGTAGGATGAGGACGAGCTGGTTGAACCTCCCACCCAAGGTTACTTGGGAGCTGGAACGACATTTTTAGAAGCTTCCGGTTTACGAGTGAATCACGGAGCGTTTTTTATATAATATATATATTGTTTATATTTTGATGCATATATGTCAACAAAAACATGTAGAATGATGAATTAGATATAAAAAACATTTAAAACATAGATTGAACCATATAACAACAATCATCTAGAAGTTATAATCTTCATCAACCACGTCCACAAGTTAGTAACATAGTAACATACAACATATTGAGTCTCATGATTCATCAATCTTAAAGTTTCAAGCTTTCAAAATTCAATATATAACATTTATCATCATTG…	1466	A	G
isotig03494	TACAGGAGATTCAATGAGTTCACAACAGACGAAACAACATAGGTAGGATGAGGACGAGCTGGTTGAACCTCCCACCCAAGGTTACTTGGGAGCTGGAACGACATTTTTAGAAGCTTCCGGTTTACGAGTGAATCACGGAGCGTTTTTTATATAATATATATATTGTTTATATTTTGATGCATATATGTCAACAAAAACATGTAGAATGATGAATTAGATATAAAAAACATTTAAAACATAGATTGAACCATATAACAACAATCATCTAGAAGTTATAATCTTCATCAACCACGTCCACAAGTTAGTAACATAGTAACATACAACATATTGAGTCTCATGATTCATCAATCTTAAAGTTTCAAGCTTTCAAAATTCAATATATAACATTTATCATCATTG…	1587	C	A
isotig03494	TACAGGAGATTCAATGAGTTCACAACAGACGAAACAACATAGGTAGGATGAGGACGAGCTGGTTGAACCTCCCACCCAAGGTTACTTGGGAGCTGGAACGACATTTTTAGAAGCTTCCGGTTTACGAGTGAATCACGGAGCGTTTTTTATATAATATATATATTGTTTATATTTTGATGCATATATGTCAACAAAAACATGTAGAATGATGAATTAGATATAAAAAACATTTAAAACATAGATTGAACCATATAACAACAATCATCTAGAAGTTATAATCTTCATCAACCACGTCCACAAGTTAGTAACATAGTAACATACAACATATTGAGTCTCATGATTCATCAATCTTAAAGTTTCAAGCTTTCAAAATTCAATATATAACATTTATCATCATTG…	1650	T	C
isotig03494	TACAGGAGATTCAATGAGTTCACAACAGACGAAACAACATAGGTAGGATGAGGACGAGCTGGTTGAACCTCCCACCCAAGGTTACTTGGGAGCTGGAACGACATTTTTAGAAGCTTCCGGTTTACGAGTGAATCACGGAGCGTTTTTTATATAATATATATATTGTTTATATTTTGATGCATATATGTCAACAAAAACATGTAGAATGATGAATTAGATATAAAAAACATTTAAAACATAGATTGAACCATATAACAACAATCATCTAGAAGTTATAATCTTCATCAACCACGTCCACAAGTTAGTAACATAGTAACATACAACATATTGAGTCTCATGATTCATCAATCTTAAAGTTTCAAGCTTTCAAAATTCAATATATAACATTTATCATCATTG…	1660	C	A
isotig03494	TACAGGAGATTCAATGAGTTCACAACAGACGAAACAACATAGGTAGGATGAGGACGAGCTGGTTGAACCTCCCACCCAAGGTTACTTGGGAGCTGGAACGACATTTTTAGAAGCTTCCGGTTTACGAGTGAATCACGGAGCGTTTTTTATATAATATATATATTGTTTATATTTTGATGCATATATGTCAACAAAAACATGTAGAATGATGAATTAGATATAAAAAACATTTAAAACATAGATTGAACCATATAACAACAATCATCTAGAAGTTATAATCTTCATCAACCACGTCCACAAGTTAGTAACATAGTAACATACAACATATTGAGTCTCATGATTCATCAATCTTAAAGTTTCAAGCTTTCAAAATTCAATATATAACATTTATCATCATTG…	1668	C	G
isotig03494	TACAGGAGATTCAATGAGTTCACAACAGACGAAACAACATAGGTAGGATGAGGACGAGCTGGTTGAACCTCCCACCCAAGGTTACTTGGGAGCTGGAACGACATTTTTAGAAGCTTCCGGTTTACGAGTGAATCACGGAGCGTTTTTTATATAATATATATATTGTTTATATTTTGATGCATATATGTCAACAAAAACATGTAGAATGATGAATTAGATATAAAAAACATTTAAAACATAGATTGAACCATATAACAACAATCATCTAGAAGTTATAATCTTCATCAACCACGTCCACAAGTTAGTAACATAGTAACATACAACATATTGAGTCTCATGATTCATCAATCTTAAAGTTTCAAGCTTTCAAAATTCAATATATAACATTTATCATCATTG…	1776	A	G
isotig03494	TACAGGAGATTCAATGAGTTCACAACAGACGAAACAACATAGGTAGGATGAGGACGAGCTGGTTGAACCTCCCACCCAAGGTTACTTGGGAGCTGGAACGACATTTTTAGAAGCTTCCGGTTTACGAGTGAATCACGGAGCGTTTTTTATATAATATATATATTGTTTATATTTTGATGCATATATGTCAACAAAAACATGTAGAATGATGAATTAGATATAAAAAACATTTAAAACATAGATTGAACCATATAACAACAATCATCTAGAAGTTATAATCTTCATCAACCACGTCCACAAGTTAGTAACATAGTAACATACAACATATTGAGTCTCATGATTCATCAATCTTAAAGTTTCAAGCTTTCAAAATTCAATATATAACATTTATCATCATTG…	1853	G	T
isotig03494	TACAGGAGATTCAATGAGTTCACAACAGACGAAACAACATAGGTAGGATGAGGACGAGCTGGTTGAACCTCCCACCCAAGGTTACTTGGGAGCTGGAACGACATTTTTAGAAGCTTCCGGTTTACGAGTGAATCACGGAGCGTTTTTTATATAATATATATATTGTTTATATTTTGATGCATATATGTCAACAAAAACATGTAGAATGATGAATTAGATATAAAAAACATTTAAAACATAGATTGAACCATATAACAACAATCATCTAGAAGTTATAATCTTCATCAACCACGTCCACAAGTTAGTAACATAGTAACATACAACATATTGAGTCTCATGATTCATCAATCTTAAAGTTTCAAGCTTTCAAAATTCAATATATAACATTTATCATCATTG…	1894	G	A
isotig03494	TACAGGAGATTCAATGAGTTCACAACAGACGAAACAACATAGGTAGGATGAGGACGAGCTGGTTGAACCTCCCACCCAAGGTTACTTGGGAGCTGGAACGACATTTTTAGAAGCTTCCGGTTTACGAGTGAATCACGGAGCGTTTTTTATATAATATATATATTGTTTATATTTTGATGCATATATGTCAACAAAAACATGTAGAATGATGAATTAGATATAAAAAACATTTAAAACATAGATTGAACCATATAACAACAATCATCTAGAAGTTATAATCTTCATCAACCACGTCCACAAGTTAGTAACATAGTAACATACAACATATTGAGTCTCATGATTCATCAATCTTAAAGTTTCAAGCTTTCAAAATTCAATATATAACATTTATCATCATTG…	1899	C	G
isotig03494	TACAGGAGATTCAATGAGTTCACAACAGACGAAACAACATAGGTAGGATGAGGACGAGCTGGTTGAACCTCCCACCCAAGGTTACTTGGGAGCTGGAACGACATTTTTAGAAGCTTCCGGTTTACGAGTGAATCACGGAGCGTTTTTTATATAATATATATATTGTTTATATTTTGATGCATATATGTCAACAAAAACATGTAGAATGATGAATTAGATATAAAAAACATTTAAAACATAGATTGAACCATATAACAACAATCATCTAGAAGTTATAATCTTCATCAACCACGTCCACAAGTTAGTAACATAGTAACATACAACATATTGAGTCTCATGATTCATCAATCTTAAAGTTTCAAGCTTTCAAAATTCAATATATAACATTTATCATCATTG…	1901	A	G
isotig03494	TACAGGAGATTCAATGAGTTCACAACAGACGAAACAACATAGGTAGGATGAGGACGAGCTGGTTGAACCTCCCACCCAAGGTTACTTGGGAGCTGGAACGACATTTTTAGAAGCTTCCGGTTTACGAGTGAATCACGGAGCGTTTTTTATATAATATATATATTGTTTATATTTTGATGCATATATGTCAACAAAAACATGTAGAATGATGAATTAGATATAAAAAACATTTAAAACATAGATTGAACCATATAACAACAATCATCTAGAAGTTATAATCTTCATCAACCACGTCCACAAGTTAGTAACATAGTAACATACAACATATTGAGTCTCATGATTCATCAATCTTAAAGTTTCAAGCTTTCAAAATTCAATATATAACATTTATCATCATTG…	1908	C	T
isotig03494	TACAGGAGATTCAATGAGTTCACAACAGACGAAACAACATAGGTAGGATGAGGACGAGCTGGTTGAACCTCCCACCCAAGGTTACTTGGGAGCTGGAACGACATTTTTAGAAGCTTCCGGTTTACGAGTGAATCACGGAGCGTTTTTTATATAATATATATATTGTTTATATTTTGATGCATATATGTCAACAAAAACATGTAGAATGATGAATTAGATATAAAAAACATTTAAAACATAGATTGAACCATATAACAACAATCATCTAGAAGTTATAATCTTCATCAACCACGTCCACAAGTTAGTAACATAGTAACATACAACATATTGAGTCTCATGATTCATCAATCTTAAAGTTTCAAGCTTTCAAAATTCAATATATAACATTTATCATCATTG…	1945	A	G
isotig03494	TACAGGAGATTCAATGAGTTCACAACAGACGAAACAACATAGGTAGGATGAGGACGAGCTGGTTGAACCTCCCACCCAAGGTTACTTGGGAGCTGGAACGACATTTTTAGAAGCTTCCGGTTTACGAGTGAATCACGGAGCGTTTTTTATATAATATATATATTGTTTATATTTTGATGCATATATGTCAACAAAAACATGTAGAATGATGAATTAGATATAAAAAACATTTAAAACATAGATTGAACCATATAACAACAATCATCTAGAAGTTATAATCTTCATCAACCACGTCCACAAGTTAGTAACATAGTAACATACAACATATTGAGTCTCATGATTCATCAATCTTAAAGTTTCAAGCTTTCAAAATTCAATATATAACATTTATCATCATTG…	1952	C	T
isotig03494	TACAGGAGATTCAATGAGTTCACAACAGACGAAACAACATAGGTAGGATGAGGACGAGCTGGTTGAACCTCCCACCCAAGGTTACTTGGGAGCTGGAACGACATTTTTAGAAGCTTCCGGTTTACGAGTGAATCACGGAGCGTTTTTTATATAATATATATATTGTTTATATTTTGATGCATATATGTCAACAAAAACATGTAGAATGATGAATTAGATATAAAAAACATTTAAAACATAGATTGAACCATATAACAACAATCATCTAGAAGTTATAATCTTCATCAACCACGTCCACAAGTTAGTAACATAGTAACATACAACATATTGAGTCTCATGATTCATCAATCTTAAAGTTTCAAGCTTTCAAAATTCAATATATAACATTTATCATCATTG…	1958	G	A
isotig03494	TACAGGAGATTCAATGAGTTCACAACAGACGAAACAACATAGGTAGGATGAGGACGAGCTGGTTGAACCTCCCACCCAAGGTTACTTGGGAGCTGGAACGACATTTTTAGAAGCTTCCGGTTTACGAGTGAATCACGGAGCGTTTTTTATATAATATATATATTGTTTATATTTTGATGCATATATGTCAACAAAAACATGTAGAATGATGAATTAGATATAAAAAACATTTAAAACATAGATTGAACCATATAACAACAATCATCTAGAAGTTATAATCTTCATCAACCACGTCCACAAGTTAGTAACATAGTAACATACAACATATTGAGTCTCATGATTCATCAATCTTAAAGTTTCAAGCTTTCAAAATTCAATATATAACATTTATCATCATTG…	1970	G	A
isotig03494	TACAGGAGATTCAATGAGTTCACAACAGACGAAACAACATAGGTAGGATGAGGACGAGCTGGTTGAACCTCCCACCCAAGGTTACTTGGGAGCTGGAACGACATTTTTAGAAGCTTCCGGTTTACGAGTGAATCACGGAGCGTTTTTTATATAATATATATATTGTTTATATTTTGATGCATATATGTCAACAAAAACATGTAGAATGATGAATTAGATATAAAAAACATTTAAAACATAGATTGAACCATATAACAACAATCATCTAGAAGTTATAATCTTCATCAACCACGTCCACAAGTTAGTAACATAGTAACATACAACATATTGAGTCTCATGATTCATCAATCTTAAAGTTTCAAGCTTTCAAAATTCAATATATAACATTTATCATCATTG…	1989	G	T
isotig03494	TACAGGAGATTCAATGAGTTCACAACAGACGAAACAACATAGGTAGGATGAGGACGAGCTGGTTGAACCTCCCACCCAAGGTTACTTGGGAGCTGGAACGACATTTTTAGAAGCTTCCGGTTTACGAGTGAATCACGGAGCGTTTTTTATATAATATATATATTGTTTATATTTTGATGCATATATGTCAACAAAAACATGTAGAATGATGAATTAGATATAAAAAACATTTAAAACATAGATTGAACCATATAACAACAATCATCTAGAAGTTATAATCTTCATCAACCACGTCCACAAGTTAGTAACATAGTAACATACAACATATTGAGTCTCATGATTCATCAATCTTAAAGTTTCAAGCTTTCAAAATTCAATATATAACATTTATCATCATTG…	1991	A	G
isotig03494	TACAGGAGATTCAATGAGTTCACAACAGACGAAACAACATAGGTAGGATGAGGACGAGCTGGTTGAACCTCCCACCCAAGGTTACTTGGGAGCTGGAACGACATTTTTAGAAGCTTCCGGTTTACGAGTGAATCACGGAGCGTTTTTTATATAATATATATATTGTTTATATTTTGATGCATATATGTCAACAAAAACATGTAGAATGATGAATTAGATATAAAAAACATTTAAAACATAGATTGAACCATATAACAACAATCATCTAGAAGTTATAATCTTCATCAACCACGTCCACAAGTTAGTAACATAGTAACATACAACATATTGAGTCTCATGATTCATCAATCTTAAAGTTTCAAGCTTTCAAAATTCAATATATAACATTTATCATCATTG…	2001	C	T
isotig03494	TACAGGAGATTCAATGAGTTCACAACAGACGAAACAACATAGGTAGGATGAGGACGAGCTGGTTGAACCTCCCACCCAAGGTTACTTGGGAGCTGGAACGACATTTTTAGAAGCTTCCGGTTTACGAGTGAATCACGGAGCGTTTTTTATATAATATATATATTGTTTATATTTTGATGCATATATGTCAACAAAAACATGTAGAATGATGAATTAGATATAAAAAACATTTAAAACATAGATTGAACCATATAACAACAATCATCTAGAAGTTATAATCTTCATCAACCACGTCCACAAGTTAGTAACATAGTAACATACAACATATTGAGTCTCATGATTCATCAATCTTAAAGTTTCAAGCTTTCAAAATTCAATATATAACATTTATCATCATTG…	2013	A	G
isotig03494	TACAGGAGATTCAATGAGTTCACAACAGACGAAACAACATAGGTAGGATGAGGACGAGCTGGTTGAACCTCCCACCCAAGGTTACTTGGGAGCTGGAACGACATTTTTAGAAGCTTCCGGTTTACGAGTGAATCACGGAGCGTTTTTTATATAATATATATATTGTTTATATTTTGATGCATATATGTCAACAAAAACATGTAGAATGATGAATTAGATATAAAAAACATTTAAAACATAGATTGAACCATATAACAACAATCATCTAGAAGTTATAATCTTCATCAACCACGTCCACAAGTTAGTAACATAGTAACATACAACATATTGAGTCTCATGATTCATCAATCTTAAAGTTTCAAGCTTTCAAAATTCAATATATAACATTTATCATCATTG…	2026	C	A
isotig03494	TACAGGAGATTCAATGAGTTCACAACAGACGAAACAACATAGGTAGGATGAGGACGAGCTGGTTGAACCTCCCACCCAAGGTTACTTGGGAGCTGGAACGACATTTTTAGAAGCTTCCGGTTTACGAGTGAATCACGGAGCGTTTTTTATATAATATATATATTGTTTATATTTTGATGCATATATGTCAACAAAAACATGTAGAATGATGAATTAGATATAAAAAACATTTAAAACATAGATTGAACCATATAACAACAATCATCTAGAAGTTATAATCTTCATCAACCACGTCCACAAGTTAGTAACATAGTAACATACAACATATTGAGTCTCATGATTCATCAATCTTAAAGTTTCAAGCTTTCAAAATTCAATATATAACATTTATCATCATTG…	2033	G	A
isotig03494	TACAGGAGATTCAATGAGTTCACAACAGACGAAACAACATAGGTAGGATGAGGACGAGCTGGTTGAACCTCCCACCCAAGGTTACTTGGGAGCTGGAACGACATTTTTAGAAGCTTCCGGTTTACGAGTGAATCACGGAGCGTTTTTTATATAATATATATATTGTTTATATTTTGATGCATATATGTCAACAAAAACATGTAGAATGATGAATTAGATATAAAAAACATTTAAAACATAGATTGAACCATATAACAACAATCATCTAGAAGTTATAATCTTCATCAACCACGTCCACAAGTTAGTAACATAGTAACATACAACATATTGAGTCTCATGATTCATCAATCTTAAAGTTTCAAGCTTTCAAAATTCAATATATAACATTTATCATCATTG…	2049	C	T
isotig03494	TACAGGAGATTCAATGAGTTCACAACAGACGAAACAACATAGGTAGGATGAGGACGAGCTGGTTGAACCTCCCACCCAAGGTTACTTGGGAGCTGGAACGACATTTTTAGAAGCTTCCGGTTTACGAGTGAATCACGGAGCGTTTTTTATATAATATATATATTGTTTATATTTTGATGCATATATGTCAACAAAAACATGTAGAATGATGAATTAGATATAAAAAACATTTAAAACATAGATTGAACCATATAACAACAATCATCTAGAAGTTATAATCTTCATCAACCACGTCCACAAGTTAGTAACATAGTAACATACAACATATTGAGTCTCATGATTCATCAATCTTAAAGTTTCAAGCTTTCAAAATTCAATATATAACATTTATCATCATTG…	2056	A	C
isotig03494	TACAGGAGATTCAATGAGTTCACAACAGACGAAACAACATAGGTAGGATGAGGACGAGCTGGTTGAACCTCCCACCCAAGGTTACTTGGGAGCTGGAACGACATTTTTAGAAGCTTCCGGTTTACGAGTGAATCACGGAGCGTTTTTTATATAATATATATATTGTTTATATTTTGATGCATATATGTCAACAAAAACATGTAGAATGATGAATTAGATATAAAAAACATTTAAAACATAGATTGAACCATATAACAACAATCATCTAGAAGTTATAATCTTCATCAACCACGTCCACAAGTTAGTAACATAGTAACATACAACATATTGAGTCTCATGATTCATCAATCTTAAAGTTTCAAGCTTTCAAAATTCAATATATAACATTTATCATCATTG…	2064	G	A
isotig03494	TACAGGAGATTCAATGAGTTCACAACAGACGAAACAACATAGGTAGGATGAGGACGAGCTGGTTGAACCTCCCACCCAAGGTTACTTGGGAGCTGGAACGACATTTTTAGAAGCTTCCGGTTTACGAGTGAATCACGGAGCGTTTTTTATATAATATATATATTGTTTATATTTTGATGCATATATGTCAACAAAAACATGTAGAATGATGAATTAGATATAAAAAACATTTAAAACATAGATTGAACCATATAACAACAATCATCTAGAAGTTATAATCTTCATCAACCACGTCCACAAGTTAGTAACATAGTAACATACAACATATTGAGTCTCATGATTCATCAATCTTAAAGTTTCAAGCTTTCAAAATTCAATATATAACATTTATCATCATTG…	2086	T	G
isotig03494	TACAGGAGATTCAATGAGTTCACAACAGACGAAACAACATAGGTAGGATGAGGACGAGCTGGTTGAACCTCCCACCCAAGGTTACTTGGGAGCTGGAACGACATTTTTAGAAGCTTCCGGTTTACGAGTGAATCACGGAGCGTTTTTTATATAATATATATATTGTTTATATTTTGATGCATATATGTCAACAAAAACATGTAGAATGATGAATTAGATATAAAAAACATTTAAAACATAGATTGAACCATATAACAACAATCATCTAGAAGTTATAATCTTCATCAACCACGTCCACAAGTTAGTAACATAGTAACATACAACATATTGAGTCTCATGATTCATCAATCTTAAAGTTTCAAGCTTTCAAAATTCAATATATAACATTTATCATCATTG…	2089	C	T
isotig03494	TACAGGAGATTCAATGAGTTCACAACAGACGAAACAACATAGGTAGGATGAGGACGAGCTGGTTGAACCTCCCACCCAAGGTTACTTGGGAGCTGGAACGACATTTTTAGAAGCTTCCGGTTTACGAGTGAATCACGGAGCGTTTTTTATATAATATATATATTGTTTATATTTTGATGCATATATGTCAACAAAAACATGTAGAATGATGAATTAGATATAAAAAACATTTAAAACATAGATTGAACCATATAACAACAATCATCTAGAAGTTATAATCTTCATCAACCACGTCCACAAGTTAGTAACATAGTAACATACAACATATTGAGTCTCATGATTCATCAATCTTAAAGTTTCAAGCTTTCAAAATTCAATATATAACATTTATCATCATTG…	2091	G	A
isotig03494	TACAGGAGATTCAATGAGTTCACAACAGACGAAACAACATAGGTAGGATGAGGACGAGCTGGTTGAACCTCCCACCCAAGGTTACTTGGGAGCTGGAACGACATTTTTAGAAGCTTCCGGTTTACGAGTGAATCACGGAGCGTTTTTTATATAATATATATATTGTTTATATTTTGATGCATATATGTCAACAAAAACATGTAGAATGATGAATTAGATATAAAAAACATTTAAAACATAGATTGAACCATATAACAACAATCATCTAGAAGTTATAATCTTCATCAACCACGTCCACAAGTTAGTAACATAGTAACATACAACATATTGAGTCTCATGATTCATCAATCTTAAAGTTTCAAGCTTTCAAAATTCAATATATAACATTTATCATCATTG…	2093	G	A
isotig03494	TACAGGAGATTCAATGAGTTCACAACAGACGAAACAACATAGGTAGGATGAGGACGAGCTGGTTGAACCTCCCACCCAAGGTTACTTGGGAGCTGGAACGACATTTTTAGAAGCTTCCGGTTTACGAGTGAATCACGGAGCGTTTTTTATATAATATATATATTGTTTATATTTTGATGCATATATGTCAACAAAAACATGTAGAATGATGAATTAGATATAAAAAACATTTAAAACATAGATTGAACCATATAACAACAATCATCTAGAAGTTATAATCTTCATCAACCACGTCCACAAGTTAGTAACATAGTAACATACAACATATTGAGTCTCATGATTCATCAATCTTAAAGTTTCAAGCTTTCAAAATTCAATATATAACATTTATCATCATTG…	2107	A	C
isotig03494	TACAGGAGATTCAATGAGTTCACAACAGACGAAACAACATAGGTAGGATGAGGACGAGCTGGTTGAACCTCCCACCCAAGGTTACTTGGGAGCTGGAACGACATTTTTAGAAGCTTCCGGTTTACGAGTGAATCACGGAGCGTTTTTTATATAATATATATATTGTTTATATTTTGATGCATATATGTCAACAAAAACATGTAGAATGATGAATTAGATATAAAAAACATTTAAAACATAGATTGAACCATATAACAACAATCATCTAGAAGTTATAATCTTCATCAACCACGTCCACAAGTTAGTAACATAGTAACATACAACATATTGAGTCTCATGATTCATCAATCTTAAAGTTTCAAGCTTTCAAAATTCAATATATAACATTTATCATCATTG…	2153	C	A
isotig03494	TACAGGAGATTCAATGAGTTCACAACAGACGAAACAACATAGGTAGGATGAGGACGAGCTGGTTGAACCTCCCACCCAAGGTTACTTGGGAGCTGGAACGACATTTTTAGAAGCTTCCGGTTTACGAGTGAATCACGGAGCGTTTTTTATATAATATATATATTGTTTATATTTTGATGCATATATGTCAACAAAAACATGTAGAATGATGAATTAGATATAAAAAACATTTAAAACATAGATTGAACCATATAACAACAATCATCTAGAAGTTATAATCTTCATCAACCACGTCCACAAGTTAGTAACATAGTAACATACAACATATTGAGTCTCATGATTCATCAATCTTAAAGTTTCAAGCTTTCAAAATTCAATATATAACATTTATCATCATTG…	2252	T	C
isotig03494	TACAGGAGATTCAATGAGTTCACAACAGACGAAACAACATAGGTAGGATGAGGACGAGCTGGTTGAACCTCCCACCCAAGGTTACTTGGGAGCTGGAACGACATTTTTAGAAGCTTCCGGTTTACGAGTGAATCACGGAGCGTTTTTTATATAATATATATATTGTTTATATTTTGATGCATATATGTCAACAAAAACATGTAGAATGATGAATTAGATATAAAAAACATTTAAAACATAGATTGAACCATATAACAACAATCATCTAGAAGTTATAATCTTCATCAACCACGTCCACAAGTTAGTAACATAGTAACATACAACATATTGAGTCTCATGATTCATCAATCTTAAAGTTTCAAGCTTTCAAAATTCAATATATAACATTTATCATCATTG…	2300	C	T
isotig03494	TACAGGAGATTCAATGAGTTCACAACAGACGAAACAACATAGGTAGGATGAGGACGAGCTGGTTGAACCTCCCACCCAAGGTTACTTGGGAGCTGGAACGACATTTTTAGAAGCTTCCGGTTTACGAGTGAATCACGGAGCGTTTTTTATATAATATATATATTGTTTATATTTTGATGCATATATGTCAACAAAAACATGTAGAATGATGAATTAGATATAAAAAACATTTAAAACATAGATTGAACCATATAACAACAATCATCTAGAAGTTATAATCTTCATCAACCACGTCCACAAGTTAGTAACATAGTAACATACAACATATTGAGTCTCATGATTCATCAATCTTAAAGTTTCAAGCTTTCAAAATTCAATATATAACATTTATCATCATTG…	2302	C	G
isotig03494	TACAGGAGATTCAATGAGTTCACAACAGACGAAACAACATAGGTAGGATGAGGACGAGCTGGTTGAACCTCCCACCCAAGGTTACTTGGGAGCTGGAACGACATTTTTAGAAGCTTCCGGTTTACGAGTGAATCACGGAGCGTTTTTTATATAATATATATATTGTTTATATTTTGATGCATATATGTCAACAAAAACATGTAGAATGATGAATTAGATATAAAAAACATTTAAAACATAGATTGAACCATATAACAACAATCATCTAGAAGTTATAATCTTCATCAACCACGTCCACAAGTTAGTAACATAGTAACATACAACATATTGAGTCTCATGATTCATCAATCTTAAAGTTTCAAGCTTTCAAAATTCAATATATAACATTTATCATCATTG…	2367	A	G
isotig03494	TACAGGAGATTCAATGAGTTCACAACAGACGAAACAACATAGGTAGGATGAGGACGAGCTGGTTGAACCTCCCACCCAAGGTTACTTGGGAGCTGGAACGACATTTTTAGAAGCTTCCGGTTTACGAGTGAATCACGGAGCGTTTTTTATATAATATATATATTGTTTATATTTTGATGCATATATGTCAACAAAAACATGTAGAATGATGAATTAGATATAAAAAACATTTAAAACATAGATTGAACCATATAACAACAATCATCTAGAAGTTATAATCTTCATCAACCACGTCCACAAGTTAGTAACATAGTAACATACAACATATTGAGTCTCATGATTCATCAATCTTAAAGTTTCAAGCTTTCAAAATTCAATATATAACATTTATCATCATTG…	2368	A	G
isotig03494	TACAGGAGATTCAATGAGTTCACAACAGACGAAACAACATAGGTAGGATGAGGACGAGCTGGTTGAACCTCCCACCCAAGGTTACTTGGGAGCTGGAACGACATTTTTAGAAGCTTCCGGTTTACGAGTGAATCACGGAGCGTTTTTTATATAATATATATATTGTTTATATTTTGATGCATATATGTCAACAAAAACATGTAGAATGATGAATTAGATATAAAAAACATTTAAAACATAGATTGAACCATATAACAACAATCATCTAGAAGTTATAATCTTCATCAACCACGTCCACAAGTTAGTAACATAGTAACATACAACATATTGAGTCTCATGATTCATCAATCTTAAAGTTTCAAGCTTTCAAAATTCAATATATAACATTTATCATCATTG…	2373	G	A
isotig03494	TACAGGAGATTCAATGAGTTCACAACAGACGAAACAACATAGGTAGGATGAGGACGAGCTGGTTGAACCTCCCACCCAAGGTTACTTGGGAGCTGGAACGACATTTTTAGAAGCTTCCGGTTTACGAGTGAATCACGGAGCGTTTTTTATATAATATATATATTGTTTATATTTTGATGCATATATGTCAACAAAAACATGTAGAATGATGAATTAGATATAAAAAACATTTAAAACATAGATTGAACCATATAACAACAATCATCTAGAAGTTATAATCTTCATCAACCACGTCCACAAGTTAGTAACATAGTAACATACAACATATTGAGTCTCATGATTCATCAATCTTAAAGTTTCAAGCTTTCAAAATTCAATATATAACATTTATCATCATTG…	2389	A	G
isotig03494	TACAGGAGATTCAATGAGTTCACAACAGACGAAACAACATAGGTAGGATGAGGACGAGCTGGTTGAACCTCCCACCCAAGGTTACTTGGGAGCTGGAACGACATTTTTAGAAGCTTCCGGTTTACGAGTGAATCACGGAGCGTTTTTTATATAATATATATATTGTTTATATTTTGATGCATATATGTCAACAAAAACATGTAGAATGATGAATTAGATATAAAAAACATTTAAAACATAGATTGAACCATATAACAACAATCATCTAGAAGTTATAATCTTCATCAACCACGTCCACAAGTTAGTAACATAGTAACATACAACATATTGAGTCTCATGATTCATCAATCTTAAAGTTTCAAGCTTTCAAAATTCAATATATAACATTTATCATCATTG…	2414	T	C
isotig03494	TACAGGAGATTCAATGAGTTCACAACAGACGAAACAACATAGGTAGGATGAGGACGAGCTGGTTGAACCTCCCACCCAAGGTTACTTGGGAGCTGGAACGACATTTTTAGAAGCTTCCGGTTTACGAGTGAATCACGGAGCGTTTTTTATATAATATATATATTGTTTATATTTTGATGCATATATGTCAACAAAAACATGTAGAATGATGAATTAGATATAAAAAACATTTAAAACATAGATTGAACCATATAACAACAATCATCTAGAAGTTATAATCTTCATCAACCACGTCCACAAGTTAGTAACATAGTAACATACAACATATTGAGTCTCATGATTCATCAATCTTAAAGTTTCAAGCTTTCAAAATTCAATATATAACATTTATCATCATTG…	2415	T	C
isotig03494	TACAGGAGATTCAATGAGTTCACAACAGACGAAACAACATAGGTAGGATGAGGACGAGCTGGTTGAACCTCCCACCCAAGGTTACTTGGGAGCTGGAACGACATTTTTAGAAGCTTCCGGTTTACGAGTGAATCACGGAGCGTTTTTTATATAATATATATATTGTTTATATTTTGATGCATATATGTCAACAAAAACATGTAGAATGATGAATTAGATATAAAAAACATTTAAAACATAGATTGAACCATATAACAACAATCATCTAGAAGTTATAATCTTCATCAACCACGTCCACAAGTTAGTAACATAGTAACATACAACATATTGAGTCTCATGATTCATCAATCTTAAAGTTTCAAGCTTTCAAAATTCAATATATAACATTTATCATCATTG…	2418	G	A
isotig03494	TACAGGAGATTCAATGAGTTCACAACAGACGAAACAACATAGGTAGGATGAGGACGAGCTGGTTGAACCTCCCACCCAAGGTTACTTGGGAGCTGGAACGACATTTTTAGAAGCTTCCGGTTTACGAGTGAATCACGGAGCGTTTTTTATATAATATATATATTGTTTATATTTTGATGCATATATGTCAACAAAAACATGTAGAATGATGAATTAGATATAAAAAACATTTAAAACATAGATTGAACCATATAACAACAATCATCTAGAAGTTATAATCTTCATCAACCACGTCCACAAGTTAGTAACATAGTAACATACAACATATTGAGTCTCATGATTCATCAATCTTAAAGTTTCAAGCTTTCAAAATTCAATATATAACATTTATCATCATTG…	2428	G	A
isotig03494	TACAGGAGATTCAATGAGTTCACAACAGACGAAACAACATAGGTAGGATGAGGACGAGCTGGTTGAACCTCCCACCCAAGGTTACTTGGGAGCTGGAACGACATTTTTAGAAGCTTCCGGTTTACGAGTGAATCACGGAGCGTTTTTTATATAATATATATATTGTTTATATTTTGATGCATATATGTCAACAAAAACATGTAGAATGATGAATTAGATATAAAAAACATTTAAAACATAGATTGAACCATATAACAACAATCATCTAGAAGTTATAATCTTCATCAACCACGTCCACAAGTTAGTAACATAGTAACATACAACATATTGAGTCTCATGATTCATCAATCTTAAAGTTTCAAGCTTTCAAAATTCAATATATAACATTTATCATCATTG…	2524	G	T
isotig03494	TACAGGAGATTCAATGAGTTCACAACAGACGAAACAACATAGGTAGGATGAGGACGAGCTGGTTGAACCTCCCACCCAAGGTTACTTGGGAGCTGGAACGACATTTTTAGAAGCTTCCGGTTTACGAGTGAATCACGGAGCGTTTTTTATATAATATATATATTGTTTATATTTTGATGCATATATGTCAACAAAAACATGTAGAATGATGAATTAGATATAAAAAACATTTAAAACATAGATTGAACCATATAACAACAATCATCTAGAAGTTATAATCTTCATCAACCACGTCCACAAGTTAGTAACATAGTAACATACAACATATTGAGTCTCATGATTCATCAATCTTAAAGTTTCAAGCTTTCAAAATTCAATATATAACATTTATCATCATTG…	2529	A	T
isotig03494	TACAGGAGATTCAATGAGTTCACAACAGACGAAACAACATAGGTAGGATGAGGACGAGCTGGTTGAACCTCCCACCCAAGGTTACTTGGGAGCTGGAACGACATTTTTAGAAGCTTCCGGTTTACGAGTGAATCACGGAGCGTTTTTTATATAATATATATATTGTTTATATTTTGATGCATATATGTCAACAAAAACATGTAGAATGATGAATTAGATATAAAAAACATTTAAAACATAGATTGAACCATATAACAACAATCATCTAGAAGTTATAATCTTCATCAACCACGTCCACAAGTTAGTAACATAGTAACATACAACATATTGAGTCTCATGATTCATCAATCTTAAAGTTTCAAGCTTTCAAAATTCAATATATAACATTTATCATCATTG…	2579	T	A
isotig03494	TACAGGAGATTCAATGAGTTCACAACAGACGAAACAACATAGGTAGGATGAGGACGAGCTGGTTGAACCTCCCACCCAAGGTTACTTGGGAGCTGGAACGACATTTTTAGAAGCTTCCGGTTTACGAGTGAATCACGGAGCGTTTTTTATATAATATATATATTGTTTATATTTTGATGCATATATGTCAACAAAAACATGTAGAATGATGAATTAGATATAAAAAACATTTAAAACATAGATTGAACCATATAACAACAATCATCTAGAAGTTATAATCTTCATCAACCACGTCCACAAGTTAGTAACATAGTAACATACAACATATTGAGTCTCATGATTCATCAATCTTAAAGTTTCAAGCTTTCAAAATTCAATATATAACATTTATCATCATTG…	2635	T	C
isotig03532	TAAACCATAAACAAGAGTTAGATATAAATTTTTATCGTCCACTGAATTAAAAATTTAGCAATTTCATAATGGTTCATCACTAACAAATCTGATATTTCTTGGAAAAGACAGAATACCCAAAGAAAAGGACCCTGATATATTTATATGTTTCGCAAGACAAGCTAGTACACATAAATACTTAGCAAAGAGGTTCCTTGTGGCAAGCATTAGCTACAAGAATGTCACGACCCTTCTAATGCATGTACAACCAAAGATTCAACCCCACTTGGTCTCACGGTATATATAGTCAACAAAAGGTAGTCTCAGCCTCTGCAAATGATAGTCCCAGCGAACAAGAAAATGCCCAAAAAGGCAAGGAACTCGGTCACGGGAGAAGAAAAGAAAATCAACTCAGGAATG…	1814	A	G
isotig03532	TAAACCATAAACAAGAGTTAGATATAAATTTTTATCGTCCACTGAATTAAAAATTTAGCAATTTCATAATGGTTCATCACTAACAAATCTGATATTTCTTGGAAAAGACAGAATACCCAAAGAAAAGGACCCTGATATATTTATATGTTTCGCAAGACAAGCTAGTACACATAAATACTTAGCAAAGAGGTTCCTTGTGGCAAGCATTAGCTACAAGAATGTCACGACCCTTCTAATGCATGTACAACCAAAGATTCAACCCCACTTGGTCTCACGGTATATATAGTCAACAAAAGGTAGTCTCAGCCTCTGCAAATGATAGTCCCAGCGAACAAGAAAATGCCCAAAAAGGCAAGGAACTCGGTCACGGGAGAAGAAAAGAAAATCAACTCAGGAATG…	1974	A	T
isotig03532	TAAACCATAAACAAGAGTTAGATATAAATTTTTATCGTCCACTGAATTAAAAATTTAGCAATTTCATAATGGTTCATCACTAACAAATCTGATATTTCTTGGAAAAGACAGAATACCCAAAGAAAAGGACCCTGATATATTTATATGTTTCGCAAGACAAGCTAGTACACATAAATACTTAGCAAAGAGGTTCCTTGTGGCAAGCATTAGCTACAAGAATGTCACGACCCTTCTAATGCATGTACAACCAAAGATTCAACCCCACTTGGTCTCACGGTATATATAGTCAACAAAAGGTAGTCTCAGCCTCTGCAAATGATAGTCCCAGCGAACAAGAAAATGCCCAAAAAGGCAAGGAACTCGGTCACGGGAGAAGAAAAGAAAATCAACTCAGGAATG…	2214	G	A
isotig03532	TAAACCATAAACAAGAGTTAGATATAAATTTTTATCGTCCACTGAATTAAAAATTTAGCAATTTCATAATGGTTCATCACTAACAAATCTGATATTTCTTGGAAAAGACAGAATACCCAAAGAAAAGGACCCTGATATATTTATATGTTTCGCAAGACAAGCTAGTACACATAAATACTTAGCAAAGAGGTTCCTTGTGGCAAGCATTAGCTACAAGAATGTCACGACCCTTCTAATGCATGTACAACCAAAGATTCAACCCCACTTGGTCTCACGGTATATATAGTCAACAAAAGGTAGTCTCAGCCTCTGCAAATGATAGTCCCAGCGAACAAGAAAATGCCCAAAAAGGCAAGGAACTCGGTCACGGGAGAAGAAAAGAAAATCAACTCAGGAATG…	2288	A	G
isotig03532	TAAACCATAAACAAGAGTTAGATATAAATTTTTATCGTCCACTGAATTAAAAATTTAGCAATTTCATAATGGTTCATCACTAACAAATCTGATATTTCTTGGAAAAGACAGAATACCCAAAGAAAAGGACCCTGATATATTTATATGTTTCGCAAGACAAGCTAGTACACATAAATACTTAGCAAAGAGGTTCCTTGTGGCAAGCATTAGCTACAAGAATGTCACGACCCTTCTAATGCATGTACAACCAAAGATTCAACCCCACTTGGTCTCACGGTATATATAGTCAACAAAAGGTAGTCTCAGCCTCTGCAAATGATAGTCCCAGCGAACAAGAAAATGCCCAAAAAGGCAAGGAACTCGGTCACGGGAGAAGAAAAGAAAATCAACTCAGGAATG…	2365	C	T
isotig03532	TAAACCATAAACAAGAGTTAGATATAAATTTTTATCGTCCACTGAATTAAAAATTTAGCAATTTCATAATGGTTCATCACTAACAAATCTGATATTTCTTGGAAAAGACAGAATACCCAAAGAAAAGGACCCTGATATATTTATATGTTTCGCAAGACAAGCTAGTACACATAAATACTTAGCAAAGAGGTTCCTTGTGGCAAGCATTAGCTACAAGAATGTCACGACCCTTCTAATGCATGTACAACCAAAGATTCAACCCCACTTGGTCTCACGGTATATATAGTCAACAAAAGGTAGTCTCAGCCTCTGCAAATGATAGTCCCAGCGAACAAGAAAATGCCCAAAAAGGCAAGGAACTCGGTCACGGGAGAAGAAAAGAAAATCAACTCAGGAATG…	2383	T	A
isotig03532	TAAACCATAAACAAGAGTTAGATATAAATTTTTATCGTCCACTGAATTAAAAATTTAGCAATTTCATAATGGTTCATCACTAACAAATCTGATATTTCTTGGAAAAGACAGAATACCCAAAGAAAAGGACCCTGATATATTTATATGTTTCGCAAGACAAGCTAGTACACATAAATACTTAGCAAAGAGGTTCCTTGTGGCAAGCATTAGCTACAAGAATGTCACGACCCTTCTAATGCATGTACAACCAAAGATTCAACCCCACTTGGTCTCACGGTATATATAGTCAACAAAAGGTAGTCTCAGCCTCTGCAAATGATAGTCCCAGCGAACAAGAAAATGCCCAAAAAGGCAAGGAACTCGGTCACGGGAGAAGAAAAGAAAATCAACTCAGGAATG…	2386	G	C
isotig03532	TAAACCATAAACAAGAGTTAGATATAAATTTTTATCGTCCACTGAATTAAAAATTTAGCAATTTCATAATGGTTCATCACTAACAAATCTGATATTTCTTGGAAAAGACAGAATACCCAAAGAAAAGGACCCTGATATATTTATATGTTTCGCAAGACAAGCTAGTACACATAAATACTTAGCAAAGAGGTTCCTTGTGGCAAGCATTAGCTACAAGAATGTCACGACCCTTCTAATGCATGTACAACCAAAGATTCAACCCCACTTGGTCTCACGGTATATATAGTCAACAAAAGGTAGTCTCAGCCTCTGCAAATGATAGTCCCAGCGAACAAGAAAATGCCCAAAAAGGCAAGGAACTCGGTCACGGGAGAAGAAAAGAAAATCAACTCAGGAATG…	2438	G	T
isotig03532	TAAACCATAAACAAGAGTTAGATATAAATTTTTATCGTCCACTGAATTAAAAATTTAGCAATTTCATAATGGTTCATCACTAACAAATCTGATATTTCTTGGAAAAGACAGAATACCCAAAGAAAAGGACCCTGATATATTTATATGTTTCGCAAGACAAGCTAGTACACATAAATACTTAGCAAAGAGGTTCCTTGTGGCAAGCATTAGCTACAAGAATGTCACGACCCTTCTAATGCATGTACAACCAAAGATTCAACCCCACTTGGTCTCACGGTATATATAGTCAACAAAAGGTAGTCTCAGCCTCTGCAAATGATAGTCCCAGCGAACAAGAAAATGCCCAAAAAGGCAAGGAACTCGGTCACGGGAGAAGAAAAGAAAATCAACTCAGGAATG…	2529	A	T
isotig03532	TAAACCATAAACAAGAGTTAGATATAAATTTTTATCGTCCACTGAATTAAAAATTTAGCAATTTCATAATGGTTCATCACTAACAAATCTGATATTTCTTGGAAAAGACAGAATACCCAAAGAAAAGGACCCTGATATATTTATATGTTTCGCAAGACAAGCTAGTACACATAAATACTTAGCAAAGAGGTTCCTTGTGGCAAGCATTAGCTACAAGAATGTCACGACCCTTCTAATGCATGTACAACCAAAGATTCAACCCCACTTGGTCTCACGGTATATATAGTCAACAAAAGGTAGTCTCAGCCTCTGCAAATGATAGTCCCAGCGAACAAGAAAATGCCCAAAAAGGCAAGGAACTCGGTCACGGGAGAAGAAAAGAAAATCAACTCAGGAATG…	2725	C	T
isotig03532	TAAACCATAAACAAGAGTTAGATATAAATTTTTATCGTCCACTGAATTAAAAATTTAGCAATTTCATAATGGTTCATCACTAACAAATCTGATATTTCTTGGAAAAGACAGAATACCCAAAGAAAAGGACCCTGATATATTTATATGTTTCGCAAGACAAGCTAGTACACATAAATACTTAGCAAAGAGGTTCCTTGTGGCAAGCATTAGCTACAAGAATGTCACGACCCTTCTAATGCATGTACAACCAAAGATTCAACCCCACTTGGTCTCACGGTATATATAGTCAACAAAAGGTAGTCTCAGCCTCTGCAAATGATAGTCCCAGCGAACAAGAAAATGCCCAAAAAGGCAAGGAACTCGGTCACGGGAGAAGAAAAGAAAATCAACTCAGGAATG…	2732	C	T
isotig03532	TAAACCATAAACAAGAGTTAGATATAAATTTTTATCGTCCACTGAATTAAAAATTTAGCAATTTCATAATGGTTCATCACTAACAAATCTGATATTTCTTGGAAAAGACAGAATACCCAAAGAAAAGGACCCTGATATATTTATATGTTTCGCAAGACAAGCTAGTACACATAAATACTTAGCAAAGAGGTTCCTTGTGGCAAGCATTAGCTACAAGAATGTCACGACCCTTCTAATGCATGTACAACCAAAGATTCAACCCCACTTGGTCTCACGGTATATATAGTCAACAAAAGGTAGTCTCAGCCTCTGCAAATGATAGTCCCAGCGAACAAGAAAATGCCCAAAAAGGCAAGGAACTCGGTCACGGGAGAAGAAAAGAAAATCAACTCAGGAATG…	2748	A	C
isotig03532	TAAACCATAAACAAGAGTTAGATATAAATTTTTATCGTCCACTGAATTAAAAATTTAGCAATTTCATAATGGTTCATCACTAACAAATCTGATATTTCTTGGAAAAGACAGAATACCCAAAGAAAAGGACCCTGATATATTTATATGTTTCGCAAGACAAGCTAGTACACATAAATACTTAGCAAAGAGGTTCCTTGTGGCAAGCATTAGCTACAAGAATGTCACGACCCTTCTAATGCATGTACAACCAAAGATTCAACCCCACTTGGTCTCACGGTATATATAGTCAACAAAAGGTAGTCTCAGCCTCTGCAAATGATAGTCCCAGCGAACAAGAAAATGCCCAAAAAGGCAAGGAACTCGGTCACGGGAGAAGAAAAGAAAATCAACTCAGGAATG…	2750	C	T
isotig03532	TAAACCATAAACAAGAGTTAGATATAAATTTTTATCGTCCACTGAATTAAAAATTTAGCAATTTCATAATGGTTCATCACTAACAAATCTGATATTTCTTGGAAAAGACAGAATACCCAAAGAAAAGGACCCTGATATATTTATATGTTTCGCAAGACAAGCTAGTACACATAAATACTTAGCAAAGAGGTTCCTTGTGGCAAGCATTAGCTACAAGAATGTCACGACCCTTCTAATGCATGTACAACCAAAGATTCAACCCCACTTGGTCTCACGGTATATATAGTCAACAAAAGGTAGTCTCAGCCTCTGCAAATGATAGTCCCAGCGAACAAGAAAATGCCCAAAAAGGCAAGGAACTCGGTCACGGGAGAAGAAAAGAAAATCAACTCAGGAATG…	2761	A	G
isotig03532	TAAACCATAAACAAGAGTTAGATATAAATTTTTATCGTCCACTGAATTAAAAATTTAGCAATTTCATAATGGTTCATCACTAACAAATCTGATATTTCTTGGAAAAGACAGAATACCCAAAGAAAAGGACCCTGATATATTTATATGTTTCGCAAGACAAGCTAGTACACATAAATACTTAGCAAAGAGGTTCCTTGTGGCAAGCATTAGCTACAAGAATGTCACGACCCTTCTAATGCATGTACAACCAAAGATTCAACCCCACTTGGTCTCACGGTATATATAGTCAACAAAAGGTAGTCTCAGCCTCTGCAAATGATAGTCCCAGCGAACAAGAAAATGCCCAAAAAGGCAAGGAACTCGGTCACGGGAGAAGAAAAGAAAATCAACTCAGGAATG…	2787	A	G
isotig03532	TAAACCATAAACAAGAGTTAGATATAAATTTTTATCGTCCACTGAATTAAAAATTTAGCAATTTCATAATGGTTCATCACTAACAAATCTGATATTTCTTGGAAAAGACAGAATACCCAAAGAAAAGGACCCTGATATATTTATATGTTTCGCAAGACAAGCTAGTACACATAAATACTTAGCAAAGAGGTTCCTTGTGGCAAGCATTAGCTACAAGAATGTCACGACCCTTCTAATGCATGTACAACCAAAGATTCAACCCCACTTGGTCTCACGGTATATATAGTCAACAAAAGGTAGTCTCAGCCTCTGCAAATGATAGTCCCAGCGAACAAGAAAATGCCCAAAAAGGCAAGGAACTCGGTCACGGGAGAAGAAAAGAAAATCAACTCAGGAATG…	2789	C	T
isotig03532	TAAACCATAAACAAGAGTTAGATATAAATTTTTATCGTCCACTGAATTAAAAATTTAGCAATTTCATAATGGTTCATCACTAACAAATCTGATATTTCTTGGAAAAGACAGAATACCCAAAGAAAAGGACCCTGATATATTTATATGTTTCGCAAGACAAGCTAGTACACATAAATACTTAGCAAAGAGGTTCCTTGTGGCAAGCATTAGCTACAAGAATGTCACGACCCTTCTAATGCATGTACAACCAAAGATTCAACCCCACTTGGTCTCACGGTATATATAGTCAACAAAAGGTAGTCTCAGCCTCTGCAAATGATAGTCCCAGCGAACAAGAAAATGCCCAAAAAGGCAAGGAACTCGGTCACGGGAGAAGAAAAGAAAATCAACTCAGGAATG…	3182	C	T
isotig03532	TAAACCATAAACAAGAGTTAGATATAAATTTTTATCGTCCACTGAATTAAAAATTTAGCAATTTCATAATGGTTCATCACTAACAAATCTGATATTTCTTGGAAAAGACAGAATACCCAAAGAAAAGGACCCTGATATATTTATATGTTTCGCAAGACAAGCTAGTACACATAAATACTTAGCAAAGAGGTTCCTTGTGGCAAGCATTAGCTACAAGAATGTCACGACCCTTCTAATGCATGTACAACCAAAGATTCAACCCCACTTGGTCTCACGGTATATATAGTCAACAAAAGGTAGTCTCAGCCTCTGCAAATGATAGTCCCAGCGAACAAGAAAATGCCCAAAAAGGCAAGGAACTCGGTCACGGGAGAAGAAAAGAAAATCAACTCAGGAATG…	3188	T	C
isotig03532	TAAACCATAAACAAGAGTTAGATATAAATTTTTATCGTCCACTGAATTAAAAATTTAGCAATTTCATAATGGTTCATCACTAACAAATCTGATATTTCTTGGAAAAGACAGAATACCCAAAGAAAAGGACCCTGATATATTTATATGTTTCGCAAGACAAGCTAGTACACATAAATACTTAGCAAAGAGGTTCCTTGTGGCAAGCATTAGCTACAAGAATGTCACGACCCTTCTAATGCATGTACAACCAAAGATTCAACCCCACTTGGTCTCACGGTATATATAGTCAACAAAAGGTAGTCTCAGCCTCTGCAAATGATAGTCCCAGCGAACAAGAAAATGCCCAAAAAGGCAAGGAACTCGGTCACGGGAGAAGAAAAGAAAATCAACTCAGGAATG…	3443	T	C
isotig03584	AAAACAACAATCCCTCAATATGCACTACGAGAGCACCATAAAATTAGAAGTCGAGCAAAATTGTAAATACTTGAGAAGCAGAAGCATATTGTAACAAATTTTCAGTCCTCAATATTTGAACCTCATTCAAAACAGTGCCAAATCGGACTACTATACTCAAGGAGCCCTTCCTCCTGAGTCCCAATAACTGGGAGTGAAGGCACTCATTTTAATTTTTCGTGCGTTGCTTTCGATTTGTTTGTAACCATGTAGATAATAATGGAAATATGGCCATGTAATACCACACAGGTTGTTTACTTCCCGCGAGTAGGGAAATCTGGAGCTCACAACATGCAATGCTTCTCAAGTCCCTAGAGATATGATACGTGGAGAGAACAAATTTCAATTATAACAAATGTG…	134	A	G
isotig03584	AAAACAACAATCCCTCAATATGCACTACGAGAGCACCATAAAATTAGAAGTCGAGCAAAATTGTAAATACTTGAGAAGCAGAAGCATATTGTAACAAATTTTCAGTCCTCAATATTTGAACCTCATTCAAAACAGTGCCAAATCGGACTACTATACTCAAGGAGCCCTTCCTCCTGAGTCCCAATAACTGGGAGTGAAGGCACTCATTTTAATTTTTCGTGCGTTGCTTTCGATTTGTTTGTAACCATGTAGATAATAATGGAAATATGGCCATGTAATACCACACAGGTTGTTTACTTCCCGCGAGTAGGGAAATCTGGAGCTCACAACATGCAATGCTTCTCAAGTCCCTAGAGATATGATACGTGGAGAGAACAAATTTCAATTATAACAAATGTG…	219	G	A
isotig03584	AAAACAACAATCCCTCAATATGCACTACGAGAGCACCATAAAATTAGAAGTCGAGCAAAATTGTAAATACTTGAGAAGCAGAAGCATATTGTAACAAATTTTCAGTCCTCAATATTTGAACCTCATTCAAAACAGTGCCAAATCGGACTACTATACTCAAGGAGCCCTTCCTCCTGAGTCCCAATAACTGGGAGTGAAGGCACTCATTTTAATTTTTCGTGCGTTGCTTTCGATTTGTTTGTAACCATGTAGATAATAATGGAAATATGGCCATGTAATACCACACAGGTTGTTTACTTCCCGCGAGTAGGGAAATCTGGAGCTCACAACATGCAATGCTTCTCAAGTCCCTAGAGATATGATACGTGGAGAGAACAAATTTCAATTATAACAAATGTG…	305	G	A
isotig03584	AAAACAACAATCCCTCAATATGCACTACGAGAGCACCATAAAATTAGAAGTCGAGCAAAATTGTAAATACTTGAGAAGCAGAAGCATATTGTAACAAATTTTCAGTCCTCAATATTTGAACCTCATTCAAAACAGTGCCAAATCGGACTACTATACTCAAGGAGCCCTTCCTCCTGAGTCCCAATAACTGGGAGTGAAGGCACTCATTTTAATTTTTCGTGCGTTGCTTTCGATTTGTTTGTAACCATGTAGATAATAATGGAAATATGGCCATGTAATACCACACAGGTTGTTTACTTCCCGCGAGTAGGGAAATCTGGAGCTCACAACATGCAATGCTTCTCAAGTCCCTAGAGATATGATACGTGGAGAGAACAAATTTCAATTATAACAAATGTG…	459	G	C
isotig03584	AAAACAACAATCCCTCAATATGCACTACGAGAGCACCATAAAATTAGAAGTCGAGCAAAATTGTAAATACTTGAGAAGCAGAAGCATATTGTAACAAATTTTCAGTCCTCAATATTTGAACCTCATTCAAAACAGTGCCAAATCGGACTACTATACTCAAGGAGCCCTTCCTCCTGAGTCCCAATAACTGGGAGTGAAGGCACTCATTTTAATTTTTCGTGCGTTGCTTTCGATTTGTTTGTAACCATGTAGATAATAATGGAAATATGGCCATGTAATACCACACAGGTTGTTTACTTCCCGCGAGTAGGGAAATCTGGAGCTCACAACATGCAATGCTTCTCAAGTCCCTAGAGATATGATACGTGGAGAGAACAAATTTCAATTATAACAAATGTG…	481	G	A
isotig03584	AAAACAACAATCCCTCAATATGCACTACGAGAGCACCATAAAATTAGAAGTCGAGCAAAATTGTAAATACTTGAGAAGCAGAAGCATATTGTAACAAATTTTCAGTCCTCAATATTTGAACCTCATTCAAAACAGTGCCAAATCGGACTACTATACTCAAGGAGCCCTTCCTCCTGAGTCCCAATAACTGGGAGTGAAGGCACTCATTTTAATTTTTCGTGCGTTGCTTTCGATTTGTTTGTAACCATGTAGATAATAATGGAAATATGGCCATGTAATACCACACAGGTTGTTTACTTCCCGCGAGTAGGGAAATCTGGAGCTCACAACATGCAATGCTTCTCAAGTCCCTAGAGATATGATACGTGGAGAGAACAAATTTCAATTATAACAAATGTG…	893	G	A
isotig03584	AAAACAACAATCCCTCAATATGCACTACGAGAGCACCATAAAATTAGAAGTCGAGCAAAATTGTAAATACTTGAGAAGCAGAAGCATATTGTAACAAATTTTCAGTCCTCAATATTTGAACCTCATTCAAAACAGTGCCAAATCGGACTACTATACTCAAGGAGCCCTTCCTCCTGAGTCCCAATAACTGGGAGTGAAGGCACTCATTTTAATTTTTCGTGCGTTGCTTTCGATTTGTTTGTAACCATGTAGATAATAATGGAAATATGGCCATGTAATACCACACAGGTTGTTTACTTCCCGCGAGTAGGGAAATCTGGAGCTCACAACATGCAATGCTTCTCAAGTCCCTAGAGATATGATACGTGGAGAGAACAAATTTCAATTATAACAAATGTG…	955	A	G
isotig03584	AAAACAACAATCCCTCAATATGCACTACGAGAGCACCATAAAATTAGAAGTCGAGCAAAATTGTAAATACTTGAGAAGCAGAAGCATATTGTAACAAATTTTCAGTCCTCAATATTTGAACCTCATTCAAAACAGTGCCAAATCGGACTACTATACTCAAGGAGCCCTTCCTCCTGAGTCCCAATAACTGGGAGTGAAGGCACTCATTTTAATTTTTCGTGCGTTGCTTTCGATTTGTTTGTAACCATGTAGATAATAATGGAAATATGGCCATGTAATACCACACAGGTTGTTTACTTCCCGCGAGTAGGGAAATCTGGAGCTCACAACATGCAATGCTTCTCAAGTCCCTAGAGATATGATACGTGGAGAGAACAAATTTCAATTATAACAAATGTG…	962	T	C
isotig03584	AAAACAACAATCCCTCAATATGCACTACGAGAGCACCATAAAATTAGAAGTCGAGCAAAATTGTAAATACTTGAGAAGCAGAAGCATATTGTAACAAATTTTCAGTCCTCAATATTTGAACCTCATTCAAAACAGTGCCAAATCGGACTACTATACTCAAGGAGCCCTTCCTCCTGAGTCCCAATAACTGGGAGTGAAGGCACTCATTTTAATTTTTCGTGCGTTGCTTTCGATTTGTTTGTAACCATGTAGATAATAATGGAAATATGGCCATGTAATACCACACAGGTTGTTTACTTCCCGCGAGTAGGGAAATCTGGAGCTCACAACATGCAATGCTTCTCAAGTCCCTAGAGATATGATACGTGGAGAGAACAAATTTCAATTATAACAAATGTG…	1262	C	A
isotig03584	AAAACAACAATCCCTCAATATGCACTACGAGAGCACCATAAAATTAGAAGTCGAGCAAAATTGTAAATACTTGAGAAGCAGAAGCATATTGTAACAAATTTTCAGTCCTCAATATTTGAACCTCATTCAAAACAGTGCCAAATCGGACTACTATACTCAAGGAGCCCTTCCTCCTGAGTCCCAATAACTGGGAGTGAAGGCACTCATTTTAATTTTTCGTGCGTTGCTTTCGATTTGTTTGTAACCATGTAGATAATAATGGAAATATGGCCATGTAATACCACACAGGTTGTTTACTTCCCGCGAGTAGGGAAATCTGGAGCTCACAACATGCAATGCTTCTCAAGTCCCTAGAGATATGATACGTGGAGAGAACAAATTTCAATTATAACAAATGTG…	1278	C	G
isotig03584	AAAACAACAATCCCTCAATATGCACTACGAGAGCACCATAAAATTAGAAGTCGAGCAAAATTGTAAATACTTGAGAAGCAGAAGCATATTGTAACAAATTTTCAGTCCTCAATATTTGAACCTCATTCAAAACAGTGCCAAATCGGACTACTATACTCAAGGAGCCCTTCCTCCTGAGTCCCAATAACTGGGAGTGAAGGCACTCATTTTAATTTTTCGTGCGTTGCTTTCGATTTGTTTGTAACCATGTAGATAATAATGGAAATATGGCCATGTAATACCACACAGGTTGTTTACTTCCCGCGAGTAGGGAAATCTGGAGCTCACAACATGCAATGCTTCTCAAGTCCCTAGAGATATGATACGTGGAGAGAACAAATTTCAATTATAACAAATGTG…	1704	C	A
isotig03584	AAAACAACAATCCCTCAATATGCACTACGAGAGCACCATAAAATTAGAAGTCGAGCAAAATTGTAAATACTTGAGAAGCAGAAGCATATTGTAACAAATTTTCAGTCCTCAATATTTGAACCTCATTCAAAACAGTGCCAAATCGGACTACTATACTCAAGGAGCCCTTCCTCCTGAGTCCCAATAACTGGGAGTGAAGGCACTCATTTTAATTTTTCGTGCGTTGCTTTCGATTTGTTTGTAACCATGTAGATAATAATGGAAATATGGCCATGTAATACCACACAGGTTGTTTACTTCCCGCGAGTAGGGAAATCTGGAGCTCACAACATGCAATGCTTCTCAAGTCCCTAGAGATATGATACGTGGAGAGAACAAATTTCAATTATAACAAATGTG…	2271	C	T
isotig03584	AAAACAACAATCCCTCAATATGCACTACGAGAGCACCATAAAATTAGAAGTCGAGCAAAATTGTAAATACTTGAGAAGCAGAAGCATATTGTAACAAATTTTCAGTCCTCAATATTTGAACCTCATTCAAAACAGTGCCAAATCGGACTACTATACTCAAGGAGCCCTTCCTCCTGAGTCCCAATAACTGGGAGTGAAGGCACTCATTTTAATTTTTCGTGCGTTGCTTTCGATTTGTTTGTAACCATGTAGATAATAATGGAAATATGGCCATGTAATACCACACAGGTTGTTTACTTCCCGCGAGTAGGGAAATCTGGAGCTCACAACATGCAATGCTTCTCAAGTCCCTAGAGATATGATACGTGGAGAGAACAAATTTCAATTATAACAAATGTG…	2284	C	T
isotig03584	AAAACAACAATCCCTCAATATGCACTACGAGAGCACCATAAAATTAGAAGTCGAGCAAAATTGTAAATACTTGAGAAGCAGAAGCATATTGTAACAAATTTTCAGTCCTCAATATTTGAACCTCATTCAAAACAGTGCCAAATCGGACTACTATACTCAAGGAGCCCTTCCTCCTGAGTCCCAATAACTGGGAGTGAAGGCACTCATTTTAATTTTTCGTGCGTTGCTTTCGATTTGTTTGTAACCATGTAGATAATAATGGAAATATGGCCATGTAATACCACACAGGTTGTTTACTTCCCGCGAGTAGGGAAATCTGGAGCTCACAACATGCAATGCTTCTCAAGTCCCTAGAGATATGATACGTGGAGAGAACAAATTTCAATTATAACAAATGTG…	2319	T	C
isotig03584	AAAACAACAATCCCTCAATATGCACTACGAGAGCACCATAAAATTAGAAGTCGAGCAAAATTGTAAATACTTGAGAAGCAGAAGCATATTGTAACAAATTTTCAGTCCTCAATATTTGAACCTCATTCAAAACAGTGCCAAATCGGACTACTATACTCAAGGAGCCCTTCCTCCTGAGTCCCAATAACTGGGAGTGAAGGCACTCATTTTAATTTTTCGTGCGTTGCTTTCGATTTGTTTGTAACCATGTAGATAATAATGGAAATATGGCCATGTAATACCACACAGGTTGTTTACTTCCCGCGAGTAGGGAAATCTGGAGCTCACAACATGCAATGCTTCTCAAGTCCCTAGAGATATGATACGTGGAGAGAACAAATTTCAATTATAACAAATGTG…	2351	C	T
isotig03584	AAAACAACAATCCCTCAATATGCACTACGAGAGCACCATAAAATTAGAAGTCGAGCAAAATTGTAAATACTTGAGAAGCAGAAGCATATTGTAACAAATTTTCAGTCCTCAATATTTGAACCTCATTCAAAACAGTGCCAAATCGGACTACTATACTCAAGGAGCCCTTCCTCCTGAGTCCCAATAACTGGGAGTGAAGGCACTCATTTTAATTTTTCGTGCGTTGCTTTCGATTTGTTTGTAACCATGTAGATAATAATGGAAATATGGCCATGTAATACCACACAGGTTGTTTACTTCCCGCGAGTAGGGAAATCTGGAGCTCACAACATGCAATGCTTCTCAAGTCCCTAGAGATATGATACGTGGAGAGAACAAATTTCAATTATAACAAATGTG…	2611	T	G
isotig03629	GTTAAATCAAATTCGAATAGCTAAAAACGAATAACCGAACTTCTCACAACAAACCTCGCGGGCTGTATATAAAAAATCATGGCAACAGAATTTTTGGGTTTACCCCAGAAGTTTATATACATTGAGCAACCAGGGCAAATCATAGTTCCAAATATTCAAAACAAGAACATGAAATAAATGAATGGTGATTAAAAGCCATTAACTCTCTAATGTCAGCTGAACATATAATGCCCAAGCCACAAGATCACGAGAAATGGCTTGACCATAGAACGCTGATAAACAAATAATTCAGTGCCTTAATATTAGCTGAACAGATAATGCTCAAGCTATTAGAACGGTAAAATCGTTGAAAATTCAGTGTCTTTATATAAGCTGAACAAACAATGTTCAAGCCATTAG…	195	G	A
isotig03629	GTTAAATCAAATTCGAATAGCTAAAAACGAATAACCGAACTTCTCACAACAAACCTCGCGGGCTGTATATAAAAAATCATGGCAACAGAATTTTTGGGTTTACCCCAGAAGTTTATATACATTGAGCAACCAGGGCAAATCATAGTTCCAAATATTCAAAACAAGAACATGAAATAAATGAATGGTGATTAAAAGCCATTAACTCTCTAATGTCAGCTGAACATATAATGCCCAAGCCACAAGATCACGAGAAATGGCTTGACCATAGAACGCTGATAAACAAATAATTCAGTGCCTTAATATTAGCTGAACAGATAATGCTCAAGCTATTAGAACGGTAAAATCGTTGAAAATTCAGTGTCTTTATATAAGCTGAACAAACAATGTTCAAGCCATTAG…	240	C	T
isotig03629	GTTAAATCAAATTCGAATAGCTAAAAACGAATAACCGAACTTCTCACAACAAACCTCGCGGGCTGTATATAAAAAATCATGGCAACAGAATTTTTGGGTTTACCCCAGAAGTTTATATACATTGAGCAACCAGGGCAAATCATAGTTCCAAATATTCAAAACAAGAACATGAAATAAATGAATGGTGATTAAAAGCCATTAACTCTCTAATGTCAGCTGAACATATAATGCCCAAGCCACAAGATCACGAGAAATGGCTTGACCATAGAACGCTGATAAACAAATAATTCAGTGCCTTAATATTAGCTGAACAGATAATGCTCAAGCTATTAGAACGGTAAAATCGTTGAAAATTCAGTGTCTTTATATAAGCTGAACAAACAATGTTCAAGCCATTAG…	339	T	A
isotig03629	GTTAAATCAAATTCGAATAGCTAAAAACGAATAACCGAACTTCTCACAACAAACCTCGCGGGCTGTATATAAAAAATCATGGCAACAGAATTTTTGGGTTTACCCCAGAAGTTTATATACATTGAGCAACCAGGGCAAATCATAGTTCCAAATATTCAAAACAAGAACATGAAATAAATGAATGGTGATTAAAAGCCATTAACTCTCTAATGTCAGCTGAACATATAATGCCCAAGCCACAAGATCACGAGAAATGGCTTGACCATAGAACGCTGATAAACAAATAATTCAGTGCCTTAATATTAGCTGAACAGATAATGCTCAAGCTATTAGAACGGTAAAATCGTTGAAAATTCAGTGTCTTTATATAAGCTGAACAAACAATGTTCAAGCCATTAG…	371	A	C
isotig03629	GTTAAATCAAATTCGAATAGCTAAAAACGAATAACCGAACTTCTCACAACAAACCTCGCGGGCTGTATATAAAAAATCATGGCAACAGAATTTTTGGGTTTACCCCAGAAGTTTATATACATTGAGCAACCAGGGCAAATCATAGTTCCAAATATTCAAAACAAGAACATGAAATAAATGAATGGTGATTAAAAGCCATTAACTCTCTAATGTCAGCTGAACATATAATGCCCAAGCCACAAGATCACGAGAAATGGCTTGACCATAGAACGCTGATAAACAAATAATTCAGTGCCTTAATATTAGCTGAACAGATAATGCTCAAGCTATTAGAACGGTAAAATCGTTGAAAATTCAGTGTCTTTATATAAGCTGAACAAACAATGTTCAAGCCATTAG…	720	A	C
isotig03629	GTTAAATCAAATTCGAATAGCTAAAAACGAATAACCGAACTTCTCACAACAAACCTCGCGGGCTGTATATAAAAAATCATGGCAACAGAATTTTTGGGTTTACCCCAGAAGTTTATATACATTGAGCAACCAGGGCAAATCATAGTTCCAAATATTCAAAACAAGAACATGAAATAAATGAATGGTGATTAAAAGCCATTAACTCTCTAATGTCAGCTGAACATATAATGCCCAAGCCACAAGATCACGAGAAATGGCTTGACCATAGAACGCTGATAAACAAATAATTCAGTGCCTTAATATTAGCTGAACAGATAATGCTCAAGCTATTAGAACGGTAAAATCGTTGAAAATTCAGTGTCTTTATATAAGCTGAACAAACAATGTTCAAGCCATTAG…	1037	C	T
isotig03629	GTTAAATCAAATTCGAATAGCTAAAAACGAATAACCGAACTTCTCACAACAAACCTCGCGGGCTGTATATAAAAAATCATGGCAACAGAATTTTTGGGTTTACCCCAGAAGTTTATATACATTGAGCAACCAGGGCAAATCATAGTTCCAAATATTCAAAACAAGAACATGAAATAAATGAATGGTGATTAAAAGCCATTAACTCTCTAATGTCAGCTGAACATATAATGCCCAAGCCACAAGATCACGAGAAATGGCTTGACCATAGAACGCTGATAAACAAATAATTCAGTGCCTTAATATTAGCTGAACAGATAATGCTCAAGCTATTAGAACGGTAAAATCGTTGAAAATTCAGTGTCTTTATATAAGCTGAACAAACAATGTTCAAGCCATTAG…	1085	G	A
isotig03629	GTTAAATCAAATTCGAATAGCTAAAAACGAATAACCGAACTTCTCACAACAAACCTCGCGGGCTGTATATAAAAAATCATGGCAACAGAATTTTTGGGTTTACCCCAGAAGTTTATATACATTGAGCAACCAGGGCAAATCATAGTTCCAAATATTCAAAACAAGAACATGAAATAAATGAATGGTGATTAAAAGCCATTAACTCTCTAATGTCAGCTGAACATATAATGCCCAAGCCACAAGATCACGAGAAATGGCTTGACCATAGAACGCTGATAAACAAATAATTCAGTGCCTTAATATTAGCTGAACAGATAATGCTCAAGCTATTAGAACGGTAAAATCGTTGAAAATTCAGTGTCTTTATATAAGCTGAACAAACAATGTTCAAGCCATTAG…	2416	A	C
isotig03629	GTTAAATCAAATTCGAATAGCTAAAAACGAATAACCGAACTTCTCACAACAAACCTCGCGGGCTGTATATAAAAAATCATGGCAACAGAATTTTTGGGTTTACCCCAGAAGTTTATATACATTGAGCAACCAGGGCAAATCATAGTTCCAAATATTCAAAACAAGAACATGAAATAAATGAATGGTGATTAAAAGCCATTAACTCTCTAATGTCAGCTGAACATATAATGCCCAAGCCACAAGATCACGAGAAATGGCTTGACCATAGAACGCTGATAAACAAATAATTCAGTGCCTTAATATTAGCTGAACAGATAATGCTCAAGCTATTAGAACGGTAAAATCGTTGAAAATTCAGTGTCTTTATATAAGCTGAACAAACAATGTTCAAGCCATTAG…	2436	T	C
isotig03629	GTTAAATCAAATTCGAATAGCTAAAAACGAATAACCGAACTTCTCACAACAAACCTCGCGGGCTGTATATAAAAAATCATGGCAACAGAATTTTTGGGTTTACCCCAGAAGTTTATATACATTGAGCAACCAGGGCAAATCATAGTTCCAAATATTCAAAACAAGAACATGAAATAAATGAATGGTGATTAAAAGCCATTAACTCTCTAATGTCAGCTGAACATATAATGCCCAAGCCACAAGATCACGAGAAATGGCTTGACCATAGAACGCTGATAAACAAATAATTCAGTGCCTTAATATTAGCTGAACAGATAATGCTCAAGCTATTAGAACGGTAAAATCGTTGAAAATTCAGTGTCTTTATATAAGCTGAACAAACAATGTTCAAGCCATTAG…	2462	G	A
isotig03629	GTTAAATCAAATTCGAATAGCTAAAAACGAATAACCGAACTTCTCACAACAAACCTCGCGGGCTGTATATAAAAAATCATGGCAACAGAATTTTTGGGTTTACCCCAGAAGTTTATATACATTGAGCAACCAGGGCAAATCATAGTTCCAAATATTCAAAACAAGAACATGAAATAAATGAATGGTGATTAAAAGCCATTAACTCTCTAATGTCAGCTGAACATATAATGCCCAAGCCACAAGATCACGAGAAATGGCTTGACCATAGAACGCTGATAAACAAATAATTCAGTGCCTTAATATTAGCTGAACAGATAATGCTCAAGCTATTAGAACGGTAAAATCGTTGAAAATTCAGTGTCTTTATATAAGCTGAACAAACAATGTTCAAGCCATTAG…	2515	C	T
isotig03629	GTTAAATCAAATTCGAATAGCTAAAAACGAATAACCGAACTTCTCACAACAAACCTCGCGGGCTGTATATAAAAAATCATGGCAACAGAATTTTTGGGTTTACCCCAGAAGTTTATATACATTGAGCAACCAGGGCAAATCATAGTTCCAAATATTCAAAACAAGAACATGAAATAAATGAATGGTGATTAAAAGCCATTAACTCTCTAATGTCAGCTGAACATATAATGCCCAAGCCACAAGATCACGAGAAATGGCTTGACCATAGAACGCTGATAAACAAATAATTCAGTGCCTTAATATTAGCTGAACAGATAATGCTCAAGCTATTAGAACGGTAAAATCGTTGAAAATTCAGTGTCTTTATATAAGCTGAACAAACAATGTTCAAGCCATTAG…	2519	T	C
isotig03629	GTTAAATCAAATTCGAATAGCTAAAAACGAATAACCGAACTTCTCACAACAAACCTCGCGGGCTGTATATAAAAAATCATGGCAACAGAATTTTTGGGTTTACCCCAGAAGTTTATATACATTGAGCAACCAGGGCAAATCATAGTTCCAAATATTCAAAACAAGAACATGAAATAAATGAATGGTGATTAAAAGCCATTAACTCTCTAATGTCAGCTGAACATATAATGCCCAAGCCACAAGATCACGAGAAATGGCTTGACCATAGAACGCTGATAAACAAATAATTCAGTGCCTTAATATTAGCTGAACAGATAATGCTCAAGCTATTAGAACGGTAAAATCGTTGAAAATTCAGTGTCTTTATATAAGCTGAACAAACAATGTTCAAGCCATTAG…	2546	T	C
isotig03629	GTTAAATCAAATTCGAATAGCTAAAAACGAATAACCGAACTTCTCACAACAAACCTCGCGGGCTGTATATAAAAAATCATGGCAACAGAATTTTTGGGTTTACCCCAGAAGTTTATATACATTGAGCAACCAGGGCAAATCATAGTTCCAAATATTCAAAACAAGAACATGAAATAAATGAATGGTGATTAAAAGCCATTAACTCTCTAATGTCAGCTGAACATATAATGCCCAAGCCACAAGATCACGAGAAATGGCTTGACCATAGAACGCTGATAAACAAATAATTCAGTGCCTTAATATTAGCTGAACAGATAATGCTCAAGCTATTAGAACGGTAAAATCGTTGAAAATTCAGTGTCTTTATATAAGCTGAACAAACAATGTTCAAGCCATTAG…	2579	G	T
isotig03629	GTTAAATCAAATTCGAATAGCTAAAAACGAATAACCGAACTTCTCACAACAAACCTCGCGGGCTGTATATAAAAAATCATGGCAACAGAATTTTTGGGTTTACCCCAGAAGTTTATATACATTGAGCAACCAGGGCAAATCATAGTTCCAAATATTCAAAACAAGAACATGAAATAAATGAATGGTGATTAAAAGCCATTAACTCTCTAATGTCAGCTGAACATATAATGCCCAAGCCACAAGATCACGAGAAATGGCTTGACCATAGAACGCTGATAAACAAATAATTCAGTGCCTTAATATTAGCTGAACAGATAATGCTCAAGCTATTAGAACGGTAAAATCGTTGAAAATTCAGTGTCTTTATATAAGCTGAACAAACAATGTTCAAGCCATTAG…	2647	A	G
isotig03629	GTTAAATCAAATTCGAATAGCTAAAAACGAATAACCGAACTTCTCACAACAAACCTCGCGGGCTGTATATAAAAAATCATGGCAACAGAATTTTTGGGTTTACCCCAGAAGTTTATATACATTGAGCAACCAGGGCAAATCATAGTTCCAAATATTCAAAACAAGAACATGAAATAAATGAATGGTGATTAAAAGCCATTAACTCTCTAATGTCAGCTGAACATATAATGCCCAAGCCACAAGATCACGAGAAATGGCTTGACCATAGAACGCTGATAAACAAATAATTCAGTGCCTTAATATTAGCTGAACAGATAATGCTCAAGCTATTAGAACGGTAAAATCGTTGAAAATTCAGTGTCTTTATATAAGCTGAACAAACAATGTTCAAGCCATTAG…	2759	C	G
isotig03629	GTTAAATCAAATTCGAATAGCTAAAAACGAATAACCGAACTTCTCACAACAAACCTCGCGGGCTGTATATAAAAAATCATGGCAACAGAATTTTTGGGTTTACCCCAGAAGTTTATATACATTGAGCAACCAGGGCAAATCATAGTTCCAAATATTCAAAACAAGAACATGAAATAAATGAATGGTGATTAAAAGCCATTAACTCTCTAATGTCAGCTGAACATATAATGCCCAAGCCACAAGATCACGAGAAATGGCTTGACCATAGAACGCTGATAAACAAATAATTCAGTGCCTTAATATTAGCTGAACAGATAATGCTCAAGCTATTAGAACGGTAAAATCGTTGAAAATTCAGTGTCTTTATATAAGCTGAACAAACAATGTTCAAGCCATTAG…	2760	A	T
isotig03629	GTTAAATCAAATTCGAATAGCTAAAAACGAATAACCGAACTTCTCACAACAAACCTCGCGGGCTGTATATAAAAAATCATGGCAACAGAATTTTTGGGTTTACCCCAGAAGTTTATATACATTGAGCAACCAGGGCAAATCATAGTTCCAAATATTCAAAACAAGAACATGAAATAAATGAATGGTGATTAAAAGCCATTAACTCTCTAATGTCAGCTGAACATATAATGCCCAAGCCACAAGATCACGAGAAATGGCTTGACCATAGAACGCTGATAAACAAATAATTCAGTGCCTTAATATTAGCTGAACAGATAATGCTCAAGCTATTAGAACGGTAAAATCGTTGAAAATTCAGTGTCTTTATATAAGCTGAACAAACAATGTTCAAGCCATTAG…	2761	T	G
isotig03629	GTTAAATCAAATTCGAATAGCTAAAAACGAATAACCGAACTTCTCACAACAAACCTCGCGGGCTGTATATAAAAAATCATGGCAACAGAATTTTTGGGTTTACCCCAGAAGTTTATATACATTGAGCAACCAGGGCAAATCATAGTTCCAAATATTCAAAACAAGAACATGAAATAAATGAATGGTGATTAAAAGCCATTAACTCTCTAATGTCAGCTGAACATATAATGCCCAAGCCACAAGATCACGAGAAATGGCTTGACCATAGAACGCTGATAAACAAATAATTCAGTGCCTTAATATTAGCTGAACAGATAATGCTCAAGCTATTAGAACGGTAAAATCGTTGAAAATTCAGTGTCTTTATATAAGCTGAACAAACAATGTTCAAGCCATTAG…	2782	C	A
isotig03629	GTTAAATCAAATTCGAATAGCTAAAAACGAATAACCGAACTTCTCACAACAAACCTCGCGGGCTGTATATAAAAAATCATGGCAACAGAATTTTTGGGTTTACCCCAGAAGTTTATATACATTGAGCAACCAGGGCAAATCATAGTTCCAAATATTCAAAACAAGAACATGAAATAAATGAATGGTGATTAAAAGCCATTAACTCTCTAATGTCAGCTGAACATATAATGCCCAAGCCACAAGATCACGAGAAATGGCTTGACCATAGAACGCTGATAAACAAATAATTCAGTGCCTTAATATTAGCTGAACAGATAATGCTCAAGCTATTAGAACGGTAAAATCGTTGAAAATTCAGTGTCTTTATATAAGCTGAACAAACAATGTTCAAGCCATTAG…	2795	C	T
isotig03629	GTTAAATCAAATTCGAATAGCTAAAAACGAATAACCGAACTTCTCACAACAAACCTCGCGGGCTGTATATAAAAAATCATGGCAACAGAATTTTTGGGTTTACCCCAGAAGTTTATATACATTGAGCAACCAGGGCAAATCATAGTTCCAAATATTCAAAACAAGAACATGAAATAAATGAATGGTGATTAAAAGCCATTAACTCTCTAATGTCAGCTGAACATATAATGCCCAAGCCACAAGATCACGAGAAATGGCTTGACCATAGAACGCTGATAAACAAATAATTCAGTGCCTTAATATTAGCTGAACAGATAATGCTCAAGCTATTAGAACGGTAAAATCGTTGAAAATTCAGTGTCTTTATATAAGCTGAACAAACAATGTTCAAGCCATTAG…	2838	C	A
isotig03629	GTTAAATCAAATTCGAATAGCTAAAAACGAATAACCGAACTTCTCACAACAAACCTCGCGGGCTGTATATAAAAAATCATGGCAACAGAATTTTTGGGTTTACCCCAGAAGTTTATATACATTGAGCAACCAGGGCAAATCATAGTTCCAAATATTCAAAACAAGAACATGAAATAAATGAATGGTGATTAAAAGCCATTAACTCTCTAATGTCAGCTGAACATATAATGCCCAAGCCACAAGATCACGAGAAATGGCTTGACCATAGAACGCTGATAAACAAATAATTCAGTGCCTTAATATTAGCTGAACAGATAATGCTCAAGCTATTAGAACGGTAAAATCGTTGAAAATTCAGTGTCTTTATATAAGCTGAACAAACAATGTTCAAGCCATTAG…	2842	T	G
isotig03629	GTTAAATCAAATTCGAATAGCTAAAAACGAATAACCGAACTTCTCACAACAAACCTCGCGGGCTGTATATAAAAAATCATGGCAACAGAATTTTTGGGTTTACCCCAGAAGTTTATATACATTGAGCAACCAGGGCAAATCATAGTTCCAAATATTCAAAACAAGAACATGAAATAAATGAATGGTGATTAAAAGCCATTAACTCTCTAATGTCAGCTGAACATATAATGCCCAAGCCACAAGATCACGAGAAATGGCTTGACCATAGAACGCTGATAAACAAATAATTCAGTGCCTTAATATTAGCTGAACAGATAATGCTCAAGCTATTAGAACGGTAAAATCGTTGAAAATTCAGTGTCTTTATATAAGCTGAACAAACAATGTTCAAGCCATTAG…	2844	G	A
isotig03717	GACTATCTACGAGGCTAAGGACCAACCAGAAGAAGCAGTACTATATTACCGGATCCGATTGATTGAGTGCCGCGCAGAGAGCGGAGCAATGGCGGGATTACCATCAGTGGGCCGGTTAAGTTTGGGGTCACAAGGATTAGAAGTATCAGCACAGGGGTTAGGTTGCATGGGCATGTCGGCGTTCTATGGCCCTCCAAAGCCCGAGCAAGAAATGATATCTCTTATCCGACATGCCGTCTCGAGAGGTGTTACTTTCCTGGACACTTCGGATGTTTATGGCCCTTTCACCAACGAAATCCTCGTTGGAAAGGCCATTAAAGGAATTAGAGAGAAAGTCCAATTAGCCACAAAGTTTGGAGCCAGTTTTGTCGATGGAAAAATGAAGATTCGAGGAGACCC…	11	G	C
isotig03717	GACTATCTACGAGGCTAAGGACCAACCAGAAGAAGCAGTACTATATTACCGGATCCGATTGATTGAGTGCCGCGCAGAGAGCGGAGCAATGGCGGGATTACCATCAGTGGGCCGGTTAAGTTTGGGGTCACAAGGATTAGAAGTATCAGCACAGGGGTTAGGTTGCATGGGCATGTCGGCGTTCTATGGCCCTCCAAAGCCCGAGCAAGAAATGATATCTCTTATCCGACATGCCGTCTCGAGAGGTGTTACTTTCCTGGACACTTCGGATGTTTATGGCCCTTTCACCAACGAAATCCTCGTTGGAAAGGCCATTAAAGGAATTAGAGAGAAAGTCCAATTAGCCACAAAGTTTGGAGCCAGTTTTGTCGATGGAAAAATGAAGATTCGAGGAGACCC…	27	C	G
isotig03717	GACTATCTACGAGGCTAAGGACCAACCAGAAGAAGCAGTACTATATTACCGGATCCGATTGATTGAGTGCCGCGCAGAGAGCGGAGCAATGGCGGGATTACCATCAGTGGGCCGGTTAAGTTTGGGGTCACAAGGATTAGAAGTATCAGCACAGGGGTTAGGTTGCATGGGCATGTCGGCGTTCTATGGCCCTCCAAAGCCCGAGCAAGAAATGATATCTCTTATCCGACATGCCGTCTCGAGAGGTGTTACTTTCCTGGACACTTCGGATGTTTATGGCCCTTTCACCAACGAAATCCTCGTTGGAAAGGCCATTAAAGGAATTAGAGAGAAAGTCCAATTAGCCACAAAGTTTGGAGCCAGTTTTGTCGATGGAAAAATGAAGATTCGAGGAGACCC…	64	T	C
isotig03717	GACTATCTACGAGGCTAAGGACCAACCAGAAGAAGCAGTACTATATTACCGGATCCGATTGATTGAGTGCCGCGCAGAGAGCGGAGCAATGGCGGGATTACCATCAGTGGGCCGGTTAAGTTTGGGGTCACAAGGATTAGAAGTATCAGCACAGGGGTTAGGTTGCATGGGCATGTCGGCGTTCTATGGCCCTCCAAAGCCCGAGCAAGAAATGATATCTCTTATCCGACATGCCGTCTCGAGAGGTGTTACTTTCCTGGACACTTCGGATGTTTATGGCCCTTTCACCAACGAAATCCTCGTTGGAAAGGCCATTAAAGGAATTAGAGAGAAAGTCCAATTAGCCACAAAGTTTGGAGCCAGTTTTGTCGATGGAAAAATGAAGATTCGAGGAGACCC…	104	T	G
isotig03717	GACTATCTACGAGGCTAAGGACCAACCAGAAGAAGCAGTACTATATTACCGGATCCGATTGATTGAGTGCCGCGCAGAGAGCGGAGCAATGGCGGGATTACCATCAGTGGGCCGGTTAAGTTTGGGGTCACAAGGATTAGAAGTATCAGCACAGGGGTTAGGTTGCATGGGCATGTCGGCGTTCTATGGCCCTCCAAAGCCCGAGCAAGAAATGATATCTCTTATCCGACATGCCGTCTCGAGAGGTGTTACTTTCCTGGACACTTCGGATGTTTATGGCCCTTTCACCAACGAAATCCTCGTTGGAAAGGCCATTAAAGGAATTAGAGAGAAAGTCCAATTAGCCACAAAGTTTGGAGCCAGTTTTGTCGATGGAAAAATGAAGATTCGAGGAGACCC…	113	C	A
isotig03717	GACTATCTACGAGGCTAAGGACCAACCAGAAGAAGCAGTACTATATTACCGGATCCGATTGATTGAGTGCCGCGCAGAGAGCGGAGCAATGGCGGGATTACCATCAGTGGGCCGGTTAAGTTTGGGGTCACAAGGATTAGAAGTATCAGCACAGGGGTTAGGTTGCATGGGCATGTCGGCGTTCTATGGCCCTCCAAAGCCCGAGCAAGAAATGATATCTCTTATCCGACATGCCGTCTCGAGAGGTGTTACTTTCCTGGACACTTCGGATGTTTATGGCCCTTTCACCAACGAAATCCTCGTTGGAAAGGCCATTAAAGGAATTAGAGAGAAAGTCCAATTAGCCACAAAGTTTGGAGCCAGTTTTGTCGATGGAAAAATGAAGATTCGAGGAGACCC…	118	A	T
isotig03717	GACTATCTACGAGGCTAAGGACCAACCAGAAGAAGCAGTACTATATTACCGGATCCGATTGATTGAGTGCCGCGCAGAGAGCGGAGCAATGGCGGGATTACCATCAGTGGGCCGGTTAAGTTTGGGGTCACAAGGATTAGAAGTATCAGCACAGGGGTTAGGTTGCATGGGCATGTCGGCGTTCTATGGCCCTCCAAAGCCCGAGCAAGAAATGATATCTCTTATCCGACATGCCGTCTCGAGAGGTGTTACTTTCCTGGACACTTCGGATGTTTATGGCCCTTTCACCAACGAAATCCTCGTTGGAAAGGCCATTAAAGGAATTAGAGAGAAAGTCCAATTAGCCACAAAGTTTGGAGCCAGTTTTGTCGATGGAAAAATGAAGATTCGAGGAGACCC…	139	A	T
isotig03717	GACTATCTACGAGGCTAAGGACCAACCAGAAGAAGCAGTACTATATTACCGGATCCGATTGATTGAGTGCCGCGCAGAGAGCGGAGCAATGGCGGGATTACCATCAGTGGGCCGGTTAAGTTTGGGGTCACAAGGATTAGAAGTATCAGCACAGGGGTTAGGTTGCATGGGCATGTCGGCGTTCTATGGCCCTCCAAAGCCCGAGCAAGAAATGATATCTCTTATCCGACATGCCGTCTCGAGAGGTGTTACTTTCCTGGACACTTCGGATGTTTATGGCCCTTTCACCAACGAAATCCTCGTTGGAAAGGCCATTAAAGGAATTAGAGAGAAAGTCCAATTAGCCACAAAGTTTGGAGCCAGTTTTGTCGATGGAAAAATGAAGATTCGAGGAGACCC…	163	T	C
isotig03717	GACTATCTACGAGGCTAAGGACCAACCAGAAGAAGCAGTACTATATTACCGGATCCGATTGATTGAGTGCCGCGCAGAGAGCGGAGCAATGGCGGGATTACCATCAGTGGGCCGGTTAAGTTTGGGGTCACAAGGATTAGAAGTATCAGCACAGGGGTTAGGTTGCATGGGCATGTCGGCGTTCTATGGCCCTCCAAAGCCCGAGCAAGAAATGATATCTCTTATCCGACATGCCGTCTCGAGAGGTGTTACTTTCCTGGACACTTCGGATGTTTATGGCCCTTTCACCAACGAAATCCTCGTTGGAAAGGCCATTAAAGGAATTAGAGAGAAAGTCCAATTAGCCACAAAGTTTGGAGCCAGTTTTGTCGATGGAAAAATGAAGATTCGAGGAGACCC…	196	A	C
isotig03717	GACTATCTACGAGGCTAAGGACCAACCAGAAGAAGCAGTACTATATTACCGGATCCGATTGATTGAGTGCCGCGCAGAGAGCGGAGCAATGGCGGGATTACCATCAGTGGGCCGGTTAAGTTTGGGGTCACAAGGATTAGAAGTATCAGCACAGGGGTTAGGTTGCATGGGCATGTCGGCGTTCTATGGCCCTCCAAAGCCCGAGCAAGAAATGATATCTCTTATCCGACATGCCGTCTCGAGAGGTGTTACTTTCCTGGACACTTCGGATGTTTATGGCCCTTTCACCAACGAAATCCTCGTTGGAAAGGCCATTAAAGGAATTAGAGAGAAAGTCCAATTAGCCACAAAGTTTGGAGCCAGTTTTGTCGATGGAAAAATGAAGATTCGAGGAGACCC…	206	C	G
isotig03717	GACTATCTACGAGGCTAAGGACCAACCAGAAGAAGCAGTACTATATTACCGGATCCGATTGATTGAGTGCCGCGCAGAGAGCGGAGCAATGGCGGGATTACCATCAGTGGGCCGGTTAAGTTTGGGGTCACAAGGATTAGAAGTATCAGCACAGGGGTTAGGTTGCATGGGCATGTCGGCGTTCTATGGCCCTCCAAAGCCCGAGCAAGAAATGATATCTCTTATCCGACATGCCGTCTCGAGAGGTGTTACTTTCCTGGACACTTCGGATGTTTATGGCCCTTTCACCAACGAAATCCTCGTTGGAAAGGCCATTAAAGGAATTAGAGAGAAAGTCCAATTAGCCACAAAGTTTGGAGCCAGTTTTGTCGATGGAAAAATGAAGATTCGAGGAGACCC…	216	T	C
isotig03717	GACTATCTACGAGGCTAAGGACCAACCAGAAGAAGCAGTACTATATTACCGGATCCGATTGATTGAGTGCCGCGCAGAGAGCGGAGCAATGGCGGGATTACCATCAGTGGGCCGGTTAAGTTTGGGGTCACAAGGATTAGAAGTATCAGCACAGGGGTTAGGTTGCATGGGCATGTCGGCGTTCTATGGCCCTCCAAAGCCCGAGCAAGAAATGATATCTCTTATCCGACATGCCGTCTCGAGAGGTGTTACTTTCCTGGACACTTCGGATGTTTATGGCCCTTTCACCAACGAAATCCTCGTTGGAAAGGCCATTAAAGGAATTAGAGAGAAAGTCCAATTAGCCACAAAGTTTGGAGCCAGTTTTGTCGATGGAAAAATGAAGATTCGAGGAGACCC…	235	C	G
isotig03717	GACTATCTACGAGGCTAAGGACCAACCAGAAGAAGCAGTACTATATTACCGGATCCGATTGATTGAGTGCCGCGCAGAGAGCGGAGCAATGGCGGGATTACCATCAGTGGGCCGGTTAAGTTTGGGGTCACAAGGATTAGAAGTATCAGCACAGGGGTTAGGTTGCATGGGCATGTCGGCGTTCTATGGCCCTCCAAAGCCCGAGCAAGAAATGATATCTCTTATCCGACATGCCGTCTCGAGAGGTGTTACTTTCCTGGACACTTCGGATGTTTATGGCCCTTTCACCAACGAAATCCTCGTTGGAAAGGCCATTAAAGGAATTAGAGAGAAAGTCCAATTAGCCACAAAGTTTGGAGCCAGTTTTGTCGATGGAAAAATGAAGATTCGAGGAGACCC…	241	G	C
isotig03717	GACTATCTACGAGGCTAAGGACCAACCAGAAGAAGCAGTACTATATTACCGGATCCGATTGATTGAGTGCCGCGCAGAGAGCGGAGCAATGGCGGGATTACCATCAGTGGGCCGGTTAAGTTTGGGGTCACAAGGATTAGAAGTATCAGCACAGGGGTTAGGTTGCATGGGCATGTCGGCGTTCTATGGCCCTCCAAAGCCCGAGCAAGAAATGATATCTCTTATCCGACATGCCGTCTCGAGAGGTGTTACTTTCCTGGACACTTCGGATGTTTATGGCCCTTTCACCAACGAAATCCTCGTTGGAAAGGCCATTAAAGGAATTAGAGAGAAAGTCCAATTAGCCACAAAGTTTGGAGCCAGTTTTGTCGATGGAAAAATGAAGATTCGAGGAGACCC…	264	C	T
isotig03717	GACTATCTACGAGGCTAAGGACCAACCAGAAGAAGCAGTACTATATTACCGGATCCGATTGATTGAGTGCCGCGCAGAGAGCGGAGCAATGGCGGGATTACCATCAGTGGGCCGGTTAAGTTTGGGGTCACAAGGATTAGAAGTATCAGCACAGGGGTTAGGTTGCATGGGCATGTCGGCGTTCTATGGCCCTCCAAAGCCCGAGCAAGAAATGATATCTCTTATCCGACATGCCGTCTCGAGAGGTGTTACTTTCCTGGACACTTCGGATGTTTATGGCCCTTTCACCAACGAAATCCTCGTTGGAAAGGCCATTAAAGGAATTAGAGAGAAAGTCCAATTAGCCACAAAGTTTGGAGCCAGTTTTGTCGATGGAAAAATGAAGATTCGAGGAGACCC…	271	T	C
isotig03717	GACTATCTACGAGGCTAAGGACCAACCAGAAGAAGCAGTACTATATTACCGGATCCGATTGATTGAGTGCCGCGCAGAGAGCGGAGCAATGGCGGGATTACCATCAGTGGGCCGGTTAAGTTTGGGGTCACAAGGATTAGAAGTATCAGCACAGGGGTTAGGTTGCATGGGCATGTCGGCGTTCTATGGCCCTCCAAAGCCCGAGCAAGAAATGATATCTCTTATCCGACATGCCGTCTCGAGAGGTGTTACTTTCCTGGACACTTCGGATGTTTATGGCCCTTTCACCAACGAAATCCTCGTTGGAAAGGCCATTAAAGGAATTAGAGAGAAAGTCCAATTAGCCACAAAGTTTGGAGCCAGTTTTGTCGATGGAAAAATGAAGATTCGAGGAGACCC…	272	G	T
isotig03717	GACTATCTACGAGGCTAAGGACCAACCAGAAGAAGCAGTACTATATTACCGGATCCGATTGATTGAGTGCCGCGCAGAGAGCGGAGCAATGGCGGGATTACCATCAGTGGGCCGGTTAAGTTTGGGGTCACAAGGATTAGAAGTATCAGCACAGGGGTTAGGTTGCATGGGCATGTCGGCGTTCTATGGCCCTCCAAAGCCCGAGCAAGAAATGATATCTCTTATCCGACATGCCGTCTCGAGAGGTGTTACTTTCCTGGACACTTCGGATGTTTATGGCCCTTTCACCAACGAAATCCTCGTTGGAAAGGCCATTAAAGGAATTAGAGAGAAAGTCCAATTAGCCACAAAGTTTGGAGCCAGTTTTGTCGATGGAAAAATGAAGATTCGAGGAGACCC…	283	T	G
isotig03717	GACTATCTACGAGGCTAAGGACCAACCAGAAGAAGCAGTACTATATTACCGGATCCGATTGATTGAGTGCCGCGCAGAGAGCGGAGCAATGGCGGGATTACCATCAGTGGGCCGGTTAAGTTTGGGGTCACAAGGATTAGAAGTATCAGCACAGGGGTTAGGTTGCATGGGCATGTCGGCGTTCTATGGCCCTCCAAAGCCCGAGCAAGAAATGATATCTCTTATCCGACATGCCGTCTCGAGAGGTGTTACTTTCCTGGACACTTCGGATGTTTATGGCCCTTTCACCAACGAAATCCTCGTTGGAAAGGCCATTAAAGGAATTAGAGAGAAAGTCCAATTAGCCACAAAGTTTGGAGCCAGTTTTGTCGATGGAAAAATGAAGATTCGAGGAGACCC…	300	T	C
isotig03717	GACTATCTACGAGGCTAAGGACCAACCAGAAGAAGCAGTACTATATTACCGGATCCGATTGATTGAGTGCCGCGCAGAGAGCGGAGCAATGGCGGGATTACCATCAGTGGGCCGGTTAAGTTTGGGGTCACAAGGATTAGAAGTATCAGCACAGGGGTTAGGTTGCATGGGCATGTCGGCGTTCTATGGCCCTCCAAAGCCCGAGCAAGAAATGATATCTCTTATCCGACATGCCGTCTCGAGAGGTGTTACTTTCCTGGACACTTCGGATGTTTATGGCCCTTTCACCAACGAAATCCTCGTTGGAAAGGCCATTAAAGGAATTAGAGAGAAAGTCCAATTAGCCACAAAGTTTGGAGCCAGTTTTGTCGATGGAAAAATGAAGATTCGAGGAGACCC…	359	G	A
isotig03717	GACTATCTACGAGGCTAAGGACCAACCAGAAGAAGCAGTACTATATTACCGGATCCGATTGATTGAGTGCCGCGCAGAGAGCGGAGCAATGGCGGGATTACCATCAGTGGGCCGGTTAAGTTTGGGGTCACAAGGATTAGAAGTATCAGCACAGGGGTTAGGTTGCATGGGCATGTCGGCGTTCTATGGCCCTCCAAAGCCCGAGCAAGAAATGATATCTCTTATCCGACATGCCGTCTCGAGAGGTGTTACTTTCCTGGACACTTCGGATGTTTATGGCCCTTTCACCAACGAAATCCTCGTTGGAAAGGCCATTAAAGGAATTAGAGAGAAAGTCCAATTAGCCACAAAGTTTGGAGCCAGTTTTGTCGATGGAAAAATGAAGATTCGAGGAGACCC…	363	G	C
isotig03717	GACTATCTACGAGGCTAAGGACCAACCAGAAGAAGCAGTACTATATTACCGGATCCGATTGATTGAGTGCCGCGCAGAGAGCGGAGCAATGGCGGGATTACCATCAGTGGGCCGGTTAAGTTTGGGGTCACAAGGATTAGAAGTATCAGCACAGGGGTTAGGTTGCATGGGCATGTCGGCGTTCTATGGCCCTCCAAAGCCCGAGCAAGAAATGATATCTCTTATCCGACATGCCGTCTCGAGAGGTGTTACTTTCCTGGACACTTCGGATGTTTATGGCCCTTTCACCAACGAAATCCTCGTTGGAAAGGCCATTAAAGGAATTAGAGAGAAAGTCCAATTAGCCACAAAGTTTGGAGCCAGTTTTGTCGATGGAAAAATGAAGATTCGAGGAGACCC…	565	T	A
isotig03717	GACTATCTACGAGGCTAAGGACCAACCAGAAGAAGCAGTACTATATTACCGGATCCGATTGATTGAGTGCCGCGCAGAGAGCGGAGCAATGGCGGGATTACCATCAGTGGGCCGGTTAAGTTTGGGGTCACAAGGATTAGAAGTATCAGCACAGGGGTTAGGTTGCATGGGCATGTCGGCGTTCTATGGCCCTCCAAAGCCCGAGCAAGAAATGATATCTCTTATCCGACATGCCGTCTCGAGAGGTGTTACTTTCCTGGACACTTCGGATGTTTATGGCCCTTTCACCAACGAAATCCTCGTTGGAAAGGCCATTAAAGGAATTAGAGAGAAAGTCCAATTAGCCACAAAGTTTGGAGCCAGTTTTGTCGATGGAAAAATGAAGATTCGAGGAGACCC…	575	T	C
isotig03717	GACTATCTACGAGGCTAAGGACCAACCAGAAGAAGCAGTACTATATTACCGGATCCGATTGATTGAGTGCCGCGCAGAGAGCGGAGCAATGGCGGGATTACCATCAGTGGGCCGGTTAAGTTTGGGGTCACAAGGATTAGAAGTATCAGCACAGGGGTTAGGTTGCATGGGCATGTCGGCGTTCTATGGCCCTCCAAAGCCCGAGCAAGAAATGATATCTCTTATCCGACATGCCGTCTCGAGAGGTGTTACTTTCCTGGACACTTCGGATGTTTATGGCCCTTTCACCAACGAAATCCTCGTTGGAAAGGCCATTAAAGGAATTAGAGAGAAAGTCCAATTAGCCACAAAGTTTGGAGCCAGTTTTGTCGATGGAAAAATGAAGATTCGAGGAGACCC…	630	T	G
isotig03717	GACTATCTACGAGGCTAAGGACCAACCAGAAGAAGCAGTACTATATTACCGGATCCGATTGATTGAGTGCCGCGCAGAGAGCGGAGCAATGGCGGGATTACCATCAGTGGGCCGGTTAAGTTTGGGGTCACAAGGATTAGAAGTATCAGCACAGGGGTTAGGTTGCATGGGCATGTCGGCGTTCTATGGCCCTCCAAAGCCCGAGCAAGAAATGATATCTCTTATCCGACATGCCGTCTCGAGAGGTGTTACTTTCCTGGACACTTCGGATGTTTATGGCCCTTTCACCAACGAAATCCTCGTTGGAAAGGCCATTAAAGGAATTAGAGAGAAAGTCCAATTAGCCACAAAGTTTGGAGCCAGTTTTGTCGATGGAAAAATGAAGATTCGAGGAGACCC…	757	T	A
isotig03717	GACTATCTACGAGGCTAAGGACCAACCAGAAGAAGCAGTACTATATTACCGGATCCGATTGATTGAGTGCCGCGCAGAGAGCGGAGCAATGGCGGGATTACCATCAGTGGGCCGGTTAAGTTTGGGGTCACAAGGATTAGAAGTATCAGCACAGGGGTTAGGTTGCATGGGCATGTCGGCGTTCTATGGCCCTCCAAAGCCCGAGCAAGAAATGATATCTCTTATCCGACATGCCGTCTCGAGAGGTGTTACTTTCCTGGACACTTCGGATGTTTATGGCCCTTTCACCAACGAAATCCTCGTTGGAAAGGCCATTAAAGGAATTAGAGAGAAAGTCCAATTAGCCACAAAGTTTGGAGCCAGTTTTGTCGATGGAAAAATGAAGATTCGAGGAGACCC…	776	C	G
isotig03717	GACTATCTACGAGGCTAAGGACCAACCAGAAGAAGCAGTACTATATTACCGGATCCGATTGATTGAGTGCCGCGCAGAGAGCGGAGCAATGGCGGGATTACCATCAGTGGGCCGGTTAAGTTTGGGGTCACAAGGATTAGAAGTATCAGCACAGGGGTTAGGTTGCATGGGCATGTCGGCGTTCTATGGCCCTCCAAAGCCCGAGCAAGAAATGATATCTCTTATCCGACATGCCGTCTCGAGAGGTGTTACTTTCCTGGACACTTCGGATGTTTATGGCCCTTTCACCAACGAAATCCTCGTTGGAAAGGCCATTAAAGGAATTAGAGAGAAAGTCCAATTAGCCACAAAGTTTGGAGCCAGTTTTGTCGATGGAAAAATGAAGATTCGAGGAGACCC…	786	A	C
isotig03717	GACTATCTACGAGGCTAAGGACCAACCAGAAGAAGCAGTACTATATTACCGGATCCGATTGATTGAGTGCCGCGCAGAGAGCGGAGCAATGGCGGGATTACCATCAGTGGGCCGGTTAAGTTTGGGGTCACAAGGATTAGAAGTATCAGCACAGGGGTTAGGTTGCATGGGCATGTCGGCGTTCTATGGCCCTCCAAAGCCCGAGCAAGAAATGATATCTCTTATCCGACATGCCGTCTCGAGAGGTGTTACTTTCCTGGACACTTCGGATGTTTATGGCCCTTTCACCAACGAAATCCTCGTTGGAAAGGCCATTAAAGGAATTAGAGAGAAAGTCCAATTAGCCACAAAGTTTGGAGCCAGTTTTGTCGATGGAAAAATGAAGATTCGAGGAGACCC…	787	G	C
isotig03717	GACTATCTACGAGGCTAAGGACCAACCAGAAGAAGCAGTACTATATTACCGGATCCGATTGATTGAGTGCCGCGCAGAGAGCGGAGCAATGGCGGGATTACCATCAGTGGGCCGGTTAAGTTTGGGGTCACAAGGATTAGAAGTATCAGCACAGGGGTTAGGTTGCATGGGCATGTCGGCGTTCTATGGCCCTCCAAAGCCCGAGCAAGAAATGATATCTCTTATCCGACATGCCGTCTCGAGAGGTGTTACTTTCCTGGACACTTCGGATGTTTATGGCCCTTTCACCAACGAAATCCTCGTTGGAAAGGCCATTAAAGGAATTAGAGAGAAAGTCCAATTAGCCACAAAGTTTGGAGCCAGTTTTGTCGATGGAAAAATGAAGATTCGAGGAGACCC…	789	A	G
isotig03717	GACTATCTACGAGGCTAAGGACCAACCAGAAGAAGCAGTACTATATTACCGGATCCGATTGATTGAGTGCCGCGCAGAGAGCGGAGCAATGGCGGGATTACCATCAGTGGGCCGGTTAAGTTTGGGGTCACAAGGATTAGAAGTATCAGCACAGGGGTTAGGTTGCATGGGCATGTCGGCGTTCTATGGCCCTCCAAAGCCCGAGCAAGAAATGATATCTCTTATCCGACATGCCGTCTCGAGAGGTGTTACTTTCCTGGACACTTCGGATGTTTATGGCCCTTTCACCAACGAAATCCTCGTTGGAAAGGCCATTAAAGGAATTAGAGAGAAAGTCCAATTAGCCACAAAGTTTGGAGCCAGTTTTGTCGATGGAAAAATGAAGATTCGAGGAGACCC…	792	G	C
isotig03717	GACTATCTACGAGGCTAAGGACCAACCAGAAGAAGCAGTACTATATTACCGGATCCGATTGATTGAGTGCCGCGCAGAGAGCGGAGCAATGGCGGGATTACCATCAGTGGGCCGGTTAAGTTTGGGGTCACAAGGATTAGAAGTATCAGCACAGGGGTTAGGTTGCATGGGCATGTCGGCGTTCTATGGCCCTCCAAAGCCCGAGCAAGAAATGATATCTCTTATCCGACATGCCGTCTCGAGAGGTGTTACTTTCCTGGACACTTCGGATGTTTATGGCCCTTTCACCAACGAAATCCTCGTTGGAAAGGCCATTAAAGGAATTAGAGAGAAAGTCCAATTAGCCACAAAGTTTGGAGCCAGTTTTGTCGATGGAAAAATGAAGATTCGAGGAGACCC…	816	A	G
isotig03717	GACTATCTACGAGGCTAAGGACCAACCAGAAGAAGCAGTACTATATTACCGGATCCGATTGATTGAGTGCCGCGCAGAGAGCGGAGCAATGGCGGGATTACCATCAGTGGGCCGGTTAAGTTTGGGGTCACAAGGATTAGAAGTATCAGCACAGGGGTTAGGTTGCATGGGCATGTCGGCGTTCTATGGCCCTCCAAAGCCCGAGCAAGAAATGATATCTCTTATCCGACATGCCGTCTCGAGAGGTGTTACTTTCCTGGACACTTCGGATGTTTATGGCCCTTTCACCAACGAAATCCTCGTTGGAAAGGCCATTAAAGGAATTAGAGAGAAAGTCCAATTAGCCACAAAGTTTGGAGCCAGTTTTGTCGATGGAAAAATGAAGATTCGAGGAGACCC…	819	T	C
isotig03717	GACTATCTACGAGGCTAAGGACCAACCAGAAGAAGCAGTACTATATTACCGGATCCGATTGATTGAGTGCCGCGCAGAGAGCGGAGCAATGGCGGGATTACCATCAGTGGGCCGGTTAAGTTTGGGGTCACAAGGATTAGAAGTATCAGCACAGGGGTTAGGTTGCATGGGCATGTCGGCGTTCTATGGCCCTCCAAAGCCCGAGCAAGAAATGATATCTCTTATCCGACATGCCGTCTCGAGAGGTGTTACTTTCCTGGACACTTCGGATGTTTATGGCCCTTTCACCAACGAAATCCTCGTTGGAAAGGCCATTAAAGGAATTAGAGAGAAAGTCCAATTAGCCACAAAGTTTGGAGCCAGTTTTGTCGATGGAAAAATGAAGATTCGAGGAGACCC…	831	T	A
isotig03717	GACTATCTACGAGGCTAAGGACCAACCAGAAGAAGCAGTACTATATTACCGGATCCGATTGATTGAGTGCCGCGCAGAGAGCGGAGCAATGGCGGGATTACCATCAGTGGGCCGGTTAAGTTTGGGGTCACAAGGATTAGAAGTATCAGCACAGGGGTTAGGTTGCATGGGCATGTCGGCGTTCTATGGCCCTCCAAAGCCCGAGCAAGAAATGATATCTCTTATCCGACATGCCGTCTCGAGAGGTGTTACTTTCCTGGACACTTCGGATGTTTATGGCCCTTTCACCAACGAAATCCTCGTTGGAAAGGCCATTAAAGGAATTAGAGAGAAAGTCCAATTAGCCACAAAGTTTGGAGCCAGTTTTGTCGATGGAAAAATGAAGATTCGAGGAGACCC…	837	A	C
isotig03717	GACTATCTACGAGGCTAAGGACCAACCAGAAGAAGCAGTACTATATTACCGGATCCGATTGATTGAGTGCCGCGCAGAGAGCGGAGCAATGGCGGGATTACCATCAGTGGGCCGGTTAAGTTTGGGGTCACAAGGATTAGAAGTATCAGCACAGGGGTTAGGTTGCATGGGCATGTCGGCGTTCTATGGCCCTCCAAAGCCCGAGCAAGAAATGATATCTCTTATCCGACATGCCGTCTCGAGAGGTGTTACTTTCCTGGACACTTCGGATGTTTATGGCCCTTTCACCAACGAAATCCTCGTTGGAAAGGCCATTAAAGGAATTAGAGAGAAAGTCCAATTAGCCACAAAGTTTGGAGCCAGTTTTGTCGATGGAAAAATGAAGATTCGAGGAGACCC…	849	C	T
isotig03717	GACTATCTACGAGGCTAAGGACCAACCAGAAGAAGCAGTACTATATTACCGGATCCGATTGATTGAGTGCCGCGCAGAGAGCGGAGCAATGGCGGGATTACCATCAGTGGGCCGGTTAAGTTTGGGGTCACAAGGATTAGAAGTATCAGCACAGGGGTTAGGTTGCATGGGCATGTCGGCGTTCTATGGCCCTCCAAAGCCCGAGCAAGAAATGATATCTCTTATCCGACATGCCGTCTCGAGAGGTGTTACTTTCCTGGACACTTCGGATGTTTATGGCCCTTTCACCAACGAAATCCTCGTTGGAAAGGCCATTAAAGGAATTAGAGAGAAAGTCCAATTAGCCACAAAGTTTGGAGCCAGTTTTGTCGATGGAAAAATGAAGATTCGAGGAGACCC…	875	C	G
isotig03717	GACTATCTACGAGGCTAAGGACCAACCAGAAGAAGCAGTACTATATTACCGGATCCGATTGATTGAGTGCCGCGCAGAGAGCGGAGCAATGGCGGGATTACCATCAGTGGGCCGGTTAAGTTTGGGGTCACAAGGATTAGAAGTATCAGCACAGGGGTTAGGTTGCATGGGCATGTCGGCGTTCTATGGCCCTCCAAAGCCCGAGCAAGAAATGATATCTCTTATCCGACATGCCGTCTCGAGAGGTGTTACTTTCCTGGACACTTCGGATGTTTATGGCCCTTTCACCAACGAAATCCTCGTTGGAAAGGCCATTAAAGGAATTAGAGAGAAAGTCCAATTAGCCACAAAGTTTGGAGCCAGTTTTGTCGATGGAAAAATGAAGATTCGAGGAGACCC…	899	A	G
isotig03717	GACTATCTACGAGGCTAAGGACCAACCAGAAGAAGCAGTACTATATTACCGGATCCGATTGATTGAGTGCCGCGCAGAGAGCGGAGCAATGGCGGGATTACCATCAGTGGGCCGGTTAAGTTTGGGGTCACAAGGATTAGAAGTATCAGCACAGGGGTTAGGTTGCATGGGCATGTCGGCGTTCTATGGCCCTCCAAAGCCCGAGCAAGAAATGATATCTCTTATCCGACATGCCGTCTCGAGAGGTGTTACTTTCCTGGACACTTCGGATGTTTATGGCCCTTTCACCAACGAAATCCTCGTTGGAAAGGCCATTAAAGGAATTAGAGAGAAAGTCCAATTAGCCACAAAGTTTGGAGCCAGTTTTGTCGATGGAAAAATGAAGATTCGAGGAGACCC…	916	A	G
isotig03717	GACTATCTACGAGGCTAAGGACCAACCAGAAGAAGCAGTACTATATTACCGGATCCGATTGATTGAGTGCCGCGCAGAGAGCGGAGCAATGGCGGGATTACCATCAGTGGGCCGGTTAAGTTTGGGGTCACAAGGATTAGAAGTATCAGCACAGGGGTTAGGTTGCATGGGCATGTCGGCGTTCTATGGCCCTCCAAAGCCCGAGCAAGAAATGATATCTCTTATCCGACATGCCGTCTCGAGAGGTGTTACTTTCCTGGACACTTCGGATGTTTATGGCCCTTTCACCAACGAAATCCTCGTTGGAAAGGCCATTAAAGGAATTAGAGAGAAAGTCCAATTAGCCACAAAGTTTGGAGCCAGTTTTGTCGATGGAAAAATGAAGATTCGAGGAGACCC…	921	T	G
isotig03717	GACTATCTACGAGGCTAAGGACCAACCAGAAGAAGCAGTACTATATTACCGGATCCGATTGATTGAGTGCCGCGCAGAGAGCGGAGCAATGGCGGGATTACCATCAGTGGGCCGGTTAAGTTTGGGGTCACAAGGATTAGAAGTATCAGCACAGGGGTTAGGTTGCATGGGCATGTCGGCGTTCTATGGCCCTCCAAAGCCCGAGCAAGAAATGATATCTCTTATCCGACATGCCGTCTCGAGAGGTGTTACTTTCCTGGACACTTCGGATGTTTATGGCCCTTTCACCAACGAAATCCTCGTTGGAAAGGCCATTAAAGGAATTAGAGAGAAAGTCCAATTAGCCACAAAGTTTGGAGCCAGTTTTGTCGATGGAAAAATGAAGATTCGAGGAGACCC…	928	C	T
isotig03717	GACTATCTACGAGGCTAAGGACCAACCAGAAGAAGCAGTACTATATTACCGGATCCGATTGATTGAGTGCCGCGCAGAGAGCGGAGCAATGGCGGGATTACCATCAGTGGGCCGGTTAAGTTTGGGGTCACAAGGATTAGAAGTATCAGCACAGGGGTTAGGTTGCATGGGCATGTCGGCGTTCTATGGCCCTCCAAAGCCCGAGCAAGAAATGATATCTCTTATCCGACATGCCGTCTCGAGAGGTGTTACTTTCCTGGACACTTCGGATGTTTATGGCCCTTTCACCAACGAAATCCTCGTTGGAAAGGCCATTAAAGGAATTAGAGAGAAAGTCCAATTAGCCACAAAGTTTGGAGCCAGTTTTGTCGATGGAAAAATGAAGATTCGAGGAGACCC…	935	T	A
isotig03717	GACTATCTACGAGGCTAAGGACCAACCAGAAGAAGCAGTACTATATTACCGGATCCGATTGATTGAGTGCCGCGCAGAGAGCGGAGCAATGGCGGGATTACCATCAGTGGGCCGGTTAAGTTTGGGGTCACAAGGATTAGAAGTATCAGCACAGGGGTTAGGTTGCATGGGCATGTCGGCGTTCTATGGCCCTCCAAAGCCCGAGCAAGAAATGATATCTCTTATCCGACATGCCGTCTCGAGAGGTGTTACTTTCCTGGACACTTCGGATGTTTATGGCCCTTTCACCAACGAAATCCTCGTTGGAAAGGCCATTAAAGGAATTAGAGAGAAAGTCCAATTAGCCACAAAGTTTGGAGCCAGTTTTGTCGATGGAAAAATGAAGATTCGAGGAGACCC…	936	T	A
isotig03717	GACTATCTACGAGGCTAAGGACCAACCAGAAGAAGCAGTACTATATTACCGGATCCGATTGATTGAGTGCCGCGCAGAGAGCGGAGCAATGGCGGGATTACCATCAGTGGGCCGGTTAAGTTTGGGGTCACAAGGATTAGAAGTATCAGCACAGGGGTTAGGTTGCATGGGCATGTCGGCGTTCTATGGCCCTCCAAAGCCCGAGCAAGAAATGATATCTCTTATCCGACATGCCGTCTCGAGAGGTGTTACTTTCCTGGACACTTCGGATGTTTATGGCCCTTTCACCAACGAAATCCTCGTTGGAAAGGCCATTAAAGGAATTAGAGAGAAAGTCCAATTAGCCACAAAGTTTGGAGCCAGTTTTGTCGATGGAAAAATGAAGATTCGAGGAGACCC…	972	A	G
isotig03717	GACTATCTACGAGGCTAAGGACCAACCAGAAGAAGCAGTACTATATTACCGGATCCGATTGATTGAGTGCCGCGCAGAGAGCGGAGCAATGGCGGGATTACCATCAGTGGGCCGGTTAAGTTTGGGGTCACAAGGATTAGAAGTATCAGCACAGGGGTTAGGTTGCATGGGCATGTCGGCGTTCTATGGCCCTCCAAAGCCCGAGCAAGAAATGATATCTCTTATCCGACATGCCGTCTCGAGAGGTGTTACTTTCCTGGACACTTCGGATGTTTATGGCCCTTTCACCAACGAAATCCTCGTTGGAAAGGCCATTAAAGGAATTAGAGAGAAAGTCCAATTAGCCACAAAGTTTGGAGCCAGTTTTGTCGATGGAAAAATGAAGATTCGAGGAGACCC…	984	A	T
isotig03717	GACTATCTACGAGGCTAAGGACCAACCAGAAGAAGCAGTACTATATTACCGGATCCGATTGATTGAGTGCCGCGCAGAGAGCGGAGCAATGGCGGGATTACCATCAGTGGGCCGGTTAAGTTTGGGGTCACAAGGATTAGAAGTATCAGCACAGGGGTTAGGTTGCATGGGCATGTCGGCGTTCTATGGCCCTCCAAAGCCCGAGCAAGAAATGATATCTCTTATCCGACATGCCGTCTCGAGAGGTGTTACTTTCCTGGACACTTCGGATGTTTATGGCCCTTTCACCAACGAAATCCTCGTTGGAAAGGCCATTAAAGGAATTAGAGAGAAAGTCCAATTAGCCACAAAGTTTGGAGCCAGTTTTGTCGATGGAAAAATGAAGATTCGAGGAGACCC…	1006	G	C
isotig03717	GACTATCTACGAGGCTAAGGACCAACCAGAAGAAGCAGTACTATATTACCGGATCCGATTGATTGAGTGCCGCGCAGAGAGCGGAGCAATGGCGGGATTACCATCAGTGGGCCGGTTAAGTTTGGGGTCACAAGGATTAGAAGTATCAGCACAGGGGTTAGGTTGCATGGGCATGTCGGCGTTCTATGGCCCTCCAAAGCCCGAGCAAGAAATGATATCTCTTATCCGACATGCCGTCTCGAGAGGTGTTACTTTCCTGGACACTTCGGATGTTTATGGCCCTTTCACCAACGAAATCCTCGTTGGAAAGGCCATTAAAGGAATTAGAGAGAAAGTCCAATTAGCCACAAAGTTTGGAGCCAGTTTTGTCGATGGAAAAATGAAGATTCGAGGAGACCC…	1071	C	T
isotig03717	GACTATCTACGAGGCTAAGGACCAACCAGAAGAAGCAGTACTATATTACCGGATCCGATTGATTGAGTGCCGCGCAGAGAGCGGAGCAATGGCGGGATTACCATCAGTGGGCCGGTTAAGTTTGGGGTCACAAGGATTAGAAGTATCAGCACAGGGGTTAGGTTGCATGGGCATGTCGGCGTTCTATGGCCCTCCAAAGCCCGAGCAAGAAATGATATCTCTTATCCGACATGCCGTCTCGAGAGGTGTTACTTTCCTGGACACTTCGGATGTTTATGGCCCTTTCACCAACGAAATCCTCGTTGGAAAGGCCATTAAAGGAATTAGAGAGAAAGTCCAATTAGCCACAAAGTTTGGAGCCAGTTTTGTCGATGGAAAAATGAAGATTCGAGGAGACCC…	1113	T	C
isotig03717	GACTATCTACGAGGCTAAGGACCAACCAGAAGAAGCAGTACTATATTACCGGATCCGATTGATTGAGTGCCGCGCAGAGAGCGGAGCAATGGCGGGATTACCATCAGTGGGCCGGTTAAGTTTGGGGTCACAAGGATTAGAAGTATCAGCACAGGGGTTAGGTTGCATGGGCATGTCGGCGTTCTATGGCCCTCCAAAGCCCGAGCAAGAAATGATATCTCTTATCCGACATGCCGTCTCGAGAGGTGTTACTTTCCTGGACACTTCGGATGTTTATGGCCCTTTCACCAACGAAATCCTCGTTGGAAAGGCCATTAAAGGAATTAGAGAGAAAGTCCAATTAGCCACAAAGTTTGGAGCCAGTTTTGTCGATGGAAAAATGAAGATTCGAGGAGACCC…	1124	T	C
isotig03717	GACTATCTACGAGGCTAAGGACCAACCAGAAGAAGCAGTACTATATTACCGGATCCGATTGATTGAGTGCCGCGCAGAGAGCGGAGCAATGGCGGGATTACCATCAGTGGGCCGGTTAAGTTTGGGGTCACAAGGATTAGAAGTATCAGCACAGGGGTTAGGTTGCATGGGCATGTCGGCGTTCTATGGCCCTCCAAAGCCCGAGCAAGAAATGATATCTCTTATCCGACATGCCGTCTCGAGAGGTGTTACTTTCCTGGACACTTCGGATGTTTATGGCCCTTTCACCAACGAAATCCTCGTTGGAAAGGCCATTAAAGGAATTAGAGAGAAAGTCCAATTAGCCACAAAGTTTGGAGCCAGTTTTGTCGATGGAAAAATGAAGATTCGAGGAGACCC…	1137	G	T
isotig03717	GACTATCTACGAGGCTAAGGACCAACCAGAAGAAGCAGTACTATATTACCGGATCCGATTGATTGAGTGCCGCGCAGAGAGCGGAGCAATGGCGGGATTACCATCAGTGGGCCGGTTAAGTTTGGGGTCACAAGGATTAGAAGTATCAGCACAGGGGTTAGGTTGCATGGGCATGTCGGCGTTCTATGGCCCTCCAAAGCCCGAGCAAGAAATGATATCTCTTATCCGACATGCCGTCTCGAGAGGTGTTACTTTCCTGGACACTTCGGATGTTTATGGCCCTTTCACCAACGAAATCCTCGTTGGAAAGGCCATTAAAGGAATTAGAGAGAAAGTCCAATTAGCCACAAAGTTTGGAGCCAGTTTTGTCGATGGAAAAATGAAGATTCGAGGAGACCC…	1138	A	C
isotig03717	GACTATCTACGAGGCTAAGGACCAACCAGAAGAAGCAGTACTATATTACCGGATCCGATTGATTGAGTGCCGCGCAGAGAGCGGAGCAATGGCGGGATTACCATCAGTGGGCCGGTTAAGTTTGGGGTCACAAGGATTAGAAGTATCAGCACAGGGGTTAGGTTGCATGGGCATGTCGGCGTTCTATGGCCCTCCAAAGCCCGAGCAAGAAATGATATCTCTTATCCGACATGCCGTCTCGAGAGGTGTTACTTTCCTGGACACTTCGGATGTTTATGGCCCTTTCACCAACGAAATCCTCGTTGGAAAGGCCATTAAAGGAATTAGAGAGAAAGTCCAATTAGCCACAAAGTTTGGAGCCAGTTTTGTCGATGGAAAAATGAAGATTCGAGGAGACCC…	1151	A	C
isotig03717	GACTATCTACGAGGCTAAGGACCAACCAGAAGAAGCAGTACTATATTACCGGATCCGATTGATTGAGTGCCGCGCAGAGAGCGGAGCAATGGCGGGATTACCATCAGTGGGCCGGTTAAGTTTGGGGTCACAAGGATTAGAAGTATCAGCACAGGGGTTAGGTTGCATGGGCATGTCGGCGTTCTATGGCCCTCCAAAGCCCGAGCAAGAAATGATATCTCTTATCCGACATGCCGTCTCGAGAGGTGTTACTTTCCTGGACACTTCGGATGTTTATGGCCCTTTCACCAACGAAATCCTCGTTGGAAAGGCCATTAAAGGAATTAGAGAGAAAGTCCAATTAGCCACAAAGTTTGGAGCCAGTTTTGTCGATGGAAAAATGAAGATTCGAGGAGACCC…	1415	A	G
isotig03717	GACTATCTACGAGGCTAAGGACCAACCAGAAGAAGCAGTACTATATTACCGGATCCGATTGATTGAGTGCCGCGCAGAGAGCGGAGCAATGGCGGGATTACCATCAGTGGGCCGGTTAAGTTTGGGGTCACAAGGATTAGAAGTATCAGCACAGGGGTTAGGTTGCATGGGCATGTCGGCGTTCTATGGCCCTCCAAAGCCCGAGCAAGAAATGATATCTCTTATCCGACATGCCGTCTCGAGAGGTGTTACTTTCCTGGACACTTCGGATGTTTATGGCCCTTTCACCAACGAAATCCTCGTTGGAAAGGCCATTAAAGGAATTAGAGAGAAAGTCCAATTAGCCACAAAGTTTGGAGCCAGTTTTGTCGATGGAAAAATGAAGATTCGAGGAGACCC…	1421	T	C
isotig03717	GACTATCTACGAGGCTAAGGACCAACCAGAAGAAGCAGTACTATATTACCGGATCCGATTGATTGAGTGCCGCGCAGAGAGCGGAGCAATGGCGGGATTACCATCAGTGGGCCGGTTAAGTTTGGGGTCACAAGGATTAGAAGTATCAGCACAGGGGTTAGGTTGCATGGGCATGTCGGCGTTCTATGGCCCTCCAAAGCCCGAGCAAGAAATGATATCTCTTATCCGACATGCCGTCTCGAGAGGTGTTACTTTCCTGGACACTTCGGATGTTTATGGCCCTTTCACCAACGAAATCCTCGTTGGAAAGGCCATTAAAGGAATTAGAGAGAAAGTCCAATTAGCCACAAAGTTTGGAGCCAGTTTTGTCGATGGAAAAATGAAGATTCGAGGAGACCC…	1423	C	T
isotig03717	GACTATCTACGAGGCTAAGGACCAACCAGAAGAAGCAGTACTATATTACCGGATCCGATTGATTGAGTGCCGCGCAGAGAGCGGAGCAATGGCGGGATTACCATCAGTGGGCCGGTTAAGTTTGGGGTCACAAGGATTAGAAGTATCAGCACAGGGGTTAGGTTGCATGGGCATGTCGGCGTTCTATGGCCCTCCAAAGCCCGAGCAAGAAATGATATCTCTTATCCGACATGCCGTCTCGAGAGGTGTTACTTTCCTGGACACTTCGGATGTTTATGGCCCTTTCACCAACGAAATCCTCGTTGGAAAGGCCATTAAAGGAATTAGAGAGAAAGTCCAATTAGCCACAAAGTTTGGAGCCAGTTTTGTCGATGGAAAAATGAAGATTCGAGGAGACCC…	1436	A	T
isotig03717	GACTATCTACGAGGCTAAGGACCAACCAGAAGAAGCAGTACTATATTACCGGATCCGATTGATTGAGTGCCGCGCAGAGAGCGGAGCAATGGCGGGATTACCATCAGTGGGCCGGTTAAGTTTGGGGTCACAAGGATTAGAAGTATCAGCACAGGGGTTAGGTTGCATGGGCATGTCGGCGTTCTATGGCCCTCCAAAGCCCGAGCAAGAAATGATATCTCTTATCCGACATGCCGTCTCGAGAGGTGTTACTTTCCTGGACACTTCGGATGTTTATGGCCCTTTCACCAACGAAATCCTCGTTGGAAAGGCCATTAAAGGAATTAGAGAGAAAGTCCAATTAGCCACAAAGTTTGGAGCCAGTTTTGTCGATGGAAAAATGAAGATTCGAGGAGACCC…	1442	A	G
isotig03717	GACTATCTACGAGGCTAAGGACCAACCAGAAGAAGCAGTACTATATTACCGGATCCGATTGATTGAGTGCCGCGCAGAGAGCGGAGCAATGGCGGGATTACCATCAGTGGGCCGGTTAAGTTTGGGGTCACAAGGATTAGAAGTATCAGCACAGGGGTTAGGTTGCATGGGCATGTCGGCGTTCTATGGCCCTCCAAAGCCCGAGCAAGAAATGATATCTCTTATCCGACATGCCGTCTCGAGAGGTGTTACTTTCCTGGACACTTCGGATGTTTATGGCCCTTTCACCAACGAAATCCTCGTTGGAAAGGCCATTAAAGGAATTAGAGAGAAAGTCCAATTAGCCACAAAGTTTGGAGCCAGTTTTGTCGATGGAAAAATGAAGATTCGAGGAGACCC…	1462	G	T
isotig03717	GACTATCTACGAGGCTAAGGACCAACCAGAAGAAGCAGTACTATATTACCGGATCCGATTGATTGAGTGCCGCGCAGAGAGCGGAGCAATGGCGGGATTACCATCAGTGGGCCGGTTAAGTTTGGGGTCACAAGGATTAGAAGTATCAGCACAGGGGTTAGGTTGCATGGGCATGTCGGCGTTCTATGGCCCTCCAAAGCCCGAGCAAGAAATGATATCTCTTATCCGACATGCCGTCTCGAGAGGTGTTACTTTCCTGGACACTTCGGATGTTTATGGCCCTTTCACCAACGAAATCCTCGTTGGAAAGGCCATTAAAGGAATTAGAGAGAAAGTCCAATTAGCCACAAAGTTTGGAGCCAGTTTTGTCGATGGAAAAATGAAGATTCGAGGAGACCC…	1463	G	T
isotig03717	GACTATCTACGAGGCTAAGGACCAACCAGAAGAAGCAGTACTATATTACCGGATCCGATTGATTGAGTGCCGCGCAGAGAGCGGAGCAATGGCGGGATTACCATCAGTGGGCCGGTTAAGTTTGGGGTCACAAGGATTAGAAGTATCAGCACAGGGGTTAGGTTGCATGGGCATGTCGGCGTTCTATGGCCCTCCAAAGCCCGAGCAAGAAATGATATCTCTTATCCGACATGCCGTCTCGAGAGGTGTTACTTTCCTGGACACTTCGGATGTTTATGGCCCTTTCACCAACGAAATCCTCGTTGGAAAGGCCATTAAAGGAATTAGAGAGAAAGTCCAATTAGCCACAAAGTTTGGAGCCAGTTTTGTCGATGGAAAAATGAAGATTCGAGGAGACCC…	1485	G	C
isotig03717	GACTATCTACGAGGCTAAGGACCAACCAGAAGAAGCAGTACTATATTACCGGATCCGATTGATTGAGTGCCGCGCAGAGAGCGGAGCAATGGCGGGATTACCATCAGTGGGCCGGTTAAGTTTGGGGTCACAAGGATTAGAAGTATCAGCACAGGGGTTAGGTTGCATGGGCATGTCGGCGTTCTATGGCCCTCCAAAGCCCGAGCAAGAAATGATATCTCTTATCCGACATGCCGTCTCGAGAGGTGTTACTTTCCTGGACACTTCGGATGTTTATGGCCCTTTCACCAACGAAATCCTCGTTGGAAAGGCCATTAAAGGAATTAGAGAGAAAGTCCAATTAGCCACAAAGTTTGGAGCCAGTTTTGTCGATGGAAAAATGAAGATTCGAGGAGACCC…	1493	T	A
isotig03717	GACTATCTACGAGGCTAAGGACCAACCAGAAGAAGCAGTACTATATTACCGGATCCGATTGATTGAGTGCCGCGCAGAGAGCGGAGCAATGGCGGGATTACCATCAGTGGGCCGGTTAAGTTTGGGGTCACAAGGATTAGAAGTATCAGCACAGGGGTTAGGTTGCATGGGCATGTCGGCGTTCTATGGCCCTCCAAAGCCCGAGCAAGAAATGATATCTCTTATCCGACATGCCGTCTCGAGAGGTGTTACTTTCCTGGACACTTCGGATGTTTATGGCCCTTTCACCAACGAAATCCTCGTTGGAAAGGCCATTAAAGGAATTAGAGAGAAAGTCCAATTAGCCACAAAGTTTGGAGCCAGTTTTGTCGATGGAAAAATGAAGATTCGAGGAGACCC…	1520	T	A
isotig03717	GACTATCTACGAGGCTAAGGACCAACCAGAAGAAGCAGTACTATATTACCGGATCCGATTGATTGAGTGCCGCGCAGAGAGCGGAGCAATGGCGGGATTACCATCAGTGGGCCGGTTAAGTTTGGGGTCACAAGGATTAGAAGTATCAGCACAGGGGTTAGGTTGCATGGGCATGTCGGCGTTCTATGGCCCTCCAAAGCCCGAGCAAGAAATGATATCTCTTATCCGACATGCCGTCTCGAGAGGTGTTACTTTCCTGGACACTTCGGATGTTTATGGCCCTTTCACCAACGAAATCCTCGTTGGAAAGGCCATTAAAGGAATTAGAGAGAAAGTCCAATTAGCCACAAAGTTTGGAGCCAGTTTTGTCGATGGAAAAATGAAGATTCGAGGAGACCC…	1527	C	G
isotig03717	GACTATCTACGAGGCTAAGGACCAACCAGAAGAAGCAGTACTATATTACCGGATCCGATTGATTGAGTGCCGCGCAGAGAGCGGAGCAATGGCGGGATTACCATCAGTGGGCCGGTTAAGTTTGGGGTCACAAGGATTAGAAGTATCAGCACAGGGGTTAGGTTGCATGGGCATGTCGGCGTTCTATGGCCCTCCAAAGCCCGAGCAAGAAATGATATCTCTTATCCGACATGCCGTCTCGAGAGGTGTTACTTTCCTGGACACTTCGGATGTTTATGGCCCTTTCACCAACGAAATCCTCGTTGGAAAGGCCATTAAAGGAATTAGAGAGAAAGTCCAATTAGCCACAAAGTTTGGAGCCAGTTTTGTCGATGGAAAAATGAAGATTCGAGGAGACCC…	1528	A	C
isotig03751	GTCGGTGAAAATGACCTTTCCAGTGCAAATCCTCGTTAAATAATGCAAAAAAACACTTACAGGGCTAACCATAACGAAAGGTTGTATTTTATTACTGGTTATGCCAGAATGTATGCAACATTCCAACTAGAATGGCCAACAGGAGTTATACTTCCTGTTATACATAGGTATTATAGGCATCATATTATACATAACGAGAATGGATAGCAGGAGCTATACAGAGGCAGCATTGAGATAGTACTGTGATTGCATTTTTGCAGAAACATTATCCAGATTCATCTGTTTCATTGCTATCATAGTAAAATTGAGGAAGCACAGCTATACCCTAAACAGCCATTTGAAAATATAGAGAACAACTAGAAGCGGAGGCCTGCACACTCTGGTGGTGAAGTGGAAAAC…	71	A	C
isotig03751	GTCGGTGAAAATGACCTTTCCAGTGCAAATCCTCGTTAAATAATGCAAAAAAACACTTACAGGGCTAACCATAACGAAAGGTTGTATTTTATTACTGGTTATGCCAGAATGTATGCAACATTCCAACTAGAATGGCCAACAGGAGTTATACTTCCTGTTATACATAGGTATTATAGGCATCATATTATACATAACGAGAATGGATAGCAGGAGCTATACAGAGGCAGCATTGAGATAGTACTGTGATTGCATTTTTGCAGAAACATTATCCAGATTCATCTGTTTCATTGCTATCATAGTAAAATTGAGGAAGCACAGCTATACCCTAAACAGCCATTTGAAAATATAGAGAACAACTAGAAGCGGAGGCCTGCACACTCTGGTGGTGAAGTGGAAAAC…	76	G	C
isotig03751	GTCGGTGAAAATGACCTTTCCAGTGCAAATCCTCGTTAAATAATGCAAAAAAACACTTACAGGGCTAACCATAACGAAAGGTTGTATTTTATTACTGGTTATGCCAGAATGTATGCAACATTCCAACTAGAATGGCCAACAGGAGTTATACTTCCTGTTATACATAGGTATTATAGGCATCATATTATACATAACGAGAATGGATAGCAGGAGCTATACAGAGGCAGCATTGAGATAGTACTGTGATTGCATTTTTGCAGAAACATTATCCAGATTCATCTGTTTCATTGCTATCATAGTAAAATTGAGGAAGCACAGCTATACCCTAAACAGCCATTTGAAAATATAGAGAACAACTAGAAGCGGAGGCCTGCACACTCTGGTGGTGAAGTGGAAAAC…	895	C	G
isotig03877	TACTGTGCCTTGGTCACATGCGTTCCCAAAATAAGGGCTGCGGCGTACGGCGCAAATTCAAATAAAGATATTTCCCAGTCTTCCTTGTCACTCTTTACTTTCATCCTCAGCCCCTGCTCCACTCTGGTCTCCGCGATGCTATGCATCGCACCTCATTACGACCTGTTACTGTGAATTGGAGCCTGAAATTGCTCCATAGCTAGTTCGATTTTCGAGGAGCTCTTTGTGCGGCTCTCCGCTCCATGTTCAGAACAAAGATTGGAATCTTGTAGATGTTTCCTTGTGTAATTTTATGGGTAAATTTTCAACCTGAAGAACACAATTGGTTGCTGTGGTCGGTTAACTATTTTTGGCATAATGTGAAGGTTGAAAAGAATAACAGATAAAAGCAATACGTCT…	387	A	G
isotig03877	TACTGTGCCTTGGTCACATGCGTTCCCAAAATAAGGGCTGCGGCGTACGGCGCAAATTCAAATAAAGATATTTCCCAGTCTTCCTTGTCACTCTTTACTTTCATCCTCAGCCCCTGCTCCACTCTGGTCTCCGCGATGCTATGCATCGCACCTCATTACGACCTGTTACTGTGAATTGGAGCCTGAAATTGCTCCATAGCTAGTTCGATTTTCGAGGAGCTCTTTGTGCGGCTCTCCGCTCCATGTTCAGAACAAAGATTGGAATCTTGTAGATGTTTCCTTGTGTAATTTTATGGGTAAATTTTCAACCTGAAGAACACAATTGGTTGCTGTGGTCGGTTAACTATTTTTGGCATAATGTGAAGGTTGAAAAGAATAACAGATAAAAGCAATACGTCT…	764	C	T
isotig03877	TACTGTGCCTTGGTCACATGCGTTCCCAAAATAAGGGCTGCGGCGTACGGCGCAAATTCAAATAAAGATATTTCCCAGTCTTCCTTGTCACTCTTTACTTTCATCCTCAGCCCCTGCTCCACTCTGGTCTCCGCGATGCTATGCATCGCACCTCATTACGACCTGTTACTGTGAATTGGAGCCTGAAATTGCTCCATAGCTAGTTCGATTTTCGAGGAGCTCTTTGTGCGGCTCTCCGCTCCATGTTCAGAACAAAGATTGGAATCTTGTAGATGTTTCCTTGTGTAATTTTATGGGTAAATTTTCAACCTGAAGAACACAATTGGTTGCTGTGGTCGGTTAACTATTTTTGGCATAATGTGAAGGTTGAAAAGAATAACAGATAAAAGCAATACGTCT…	1155	G	A
isotig03877	TACTGTGCCTTGGTCACATGCGTTCCCAAAATAAGGGCTGCGGCGTACGGCGCAAATTCAAATAAAGATATTTCCCAGTCTTCCTTGTCACTCTTTACTTTCATCCTCAGCCCCTGCTCCACTCTGGTCTCCGCGATGCTATGCATCGCACCTCATTACGACCTGTTACTGTGAATTGGAGCCTGAAATTGCTCCATAGCTAGTTCGATTTTCGAGGAGCTCTTTGTGCGGCTCTCCGCTCCATGTTCAGAACAAAGATTGGAATCTTGTAGATGTTTCCTTGTGTAATTTTATGGGTAAATTTTCAACCTGAAGAACACAATTGGTTGCTGTGGTCGGTTAACTATTTTTGGCATAATGTGAAGGTTGAAAAGAATAACAGATAAAAGCAATACGTCT…	1319	A	C
isotig03877	TACTGTGCCTTGGTCACATGCGTTCCCAAAATAAGGGCTGCGGCGTACGGCGCAAATTCAAATAAAGATATTTCCCAGTCTTCCTTGTCACTCTTTACTTTCATCCTCAGCCCCTGCTCCACTCTGGTCTCCGCGATGCTATGCATCGCACCTCATTACGACCTGTTACTGTGAATTGGAGCCTGAAATTGCTCCATAGCTAGTTCGATTTTCGAGGAGCTCTTTGTGCGGCTCTCCGCTCCATGTTCAGAACAAAGATTGGAATCTTGTAGATGTTTCCTTGTGTAATTTTATGGGTAAATTTTCAACCTGAAGAACACAATTGGTTGCTGTGGTCGGTTAACTATTTTTGGCATAATGTGAAGGTTGAAAAGAATAACAGATAAAAGCAATACGTCT…	1821	A	G
isotig03877	TACTGTGCCTTGGTCACATGCGTTCCCAAAATAAGGGCTGCGGCGTACGGCGCAAATTCAAATAAAGATATTTCCCAGTCTTCCTTGTCACTCTTTACTTTCATCCTCAGCCCCTGCTCCACTCTGGTCTCCGCGATGCTATGCATCGCACCTCATTACGACCTGTTACTGTGAATTGGAGCCTGAAATTGCTCCATAGCTAGTTCGATTTTCGAGGAGCTCTTTGTGCGGCTCTCCGCTCCATGTTCAGAACAAAGATTGGAATCTTGTAGATGTTTCCTTGTGTAATTTTATGGGTAAATTTTCAACCTGAAGAACACAATTGGTTGCTGTGGTCGGTTAACTATTTTTGGCATAATGTGAAGGTTGAAAAGAATAACAGATAAAAGCAATACGTCT…	1941	T	C
isotig03877	TACTGTGCCTTGGTCACATGCGTTCCCAAAATAAGGGCTGCGGCGTACGGCGCAAATTCAAATAAAGATATTTCCCAGTCTTCCTTGTCACTCTTTACTTTCATCCTCAGCCCCTGCTCCACTCTGGTCTCCGCGATGCTATGCATCGCACCTCATTACGACCTGTTACTGTGAATTGGAGCCTGAAATTGCTCCATAGCTAGTTCGATTTTCGAGGAGCTCTTTGTGCGGCTCTCCGCTCCATGTTCAGAACAAAGATTGGAATCTTGTAGATGTTTCCTTGTGTAATTTTATGGGTAAATTTTCAACCTGAAGAACACAATTGGTTGCTGTGGTCGGTTAACTATTTTTGGCATAATGTGAAGGTTGAAAAGAATAACAGATAAAAGCAATACGTCT…	2034	G	A
isotig03877	TACTGTGCCTTGGTCACATGCGTTCCCAAAATAAGGGCTGCGGCGTACGGCGCAAATTCAAATAAAGATATTTCCCAGTCTTCCTTGTCACTCTTTACTTTCATCCTCAGCCCCTGCTCCACTCTGGTCTCCGCGATGCTATGCATCGCACCTCATTACGACCTGTTACTGTGAATTGGAGCCTGAAATTGCTCCATAGCTAGTTCGATTTTCGAGGAGCTCTTTGTGCGGCTCTCCGCTCCATGTTCAGAACAAAGATTGGAATCTTGTAGATGTTTCCTTGTGTAATTTTATGGGTAAATTTTCAACCTGAAGAACACAATTGGTTGCTGTGGTCGGTTAACTATTTTTGGCATAATGTGAAGGTTGAAAAGAATAACAGATAAAAGCAATACGTCT…	2244	A	G
isotig03877	TACTGTGCCTTGGTCACATGCGTTCCCAAAATAAGGGCTGCGGCGTACGGCGCAAATTCAAATAAAGATATTTCCCAGTCTTCCTTGTCACTCTTTACTTTCATCCTCAGCCCCTGCTCCACTCTGGTCTCCGCGATGCTATGCATCGCACCTCATTACGACCTGTTACTGTGAATTGGAGCCTGAAATTGCTCCATAGCTAGTTCGATTTTCGAGGAGCTCTTTGTGCGGCTCTCCGCTCCATGTTCAGAACAAAGATTGGAATCTTGTAGATGTTTCCTTGTGTAATTTTATGGGTAAATTTTCAACCTGAAGAACACAATTGGTTGCTGTGGTCGGTTAACTATTTTTGGCATAATGTGAAGGTTGAAAAGAATAACAGATAAAAGCAATACGTCT…	2332	C	G
isotig03877	TACTGTGCCTTGGTCACATGCGTTCCCAAAATAAGGGCTGCGGCGTACGGCGCAAATTCAAATAAAGATATTTCCCAGTCTTCCTTGTCACTCTTTACTTTCATCCTCAGCCCCTGCTCCACTCTGGTCTCCGCGATGCTATGCATCGCACCTCATTACGACCTGTTACTGTGAATTGGAGCCTGAAATTGCTCCATAGCTAGTTCGATTTTCGAGGAGCTCTTTGTGCGGCTCTCCGCTCCATGTTCAGAACAAAGATTGGAATCTTGTAGATGTTTCCTTGTGTAATTTTATGGGTAAATTTTCAACCTGAAGAACACAATTGGTTGCTGTGGTCGGTTAACTATTTTTGGCATAATGTGAAGGTTGAAAAGAATAACAGATAAAAGCAATACGTCT…	2333	G	T
isotig03877	TACTGTGCCTTGGTCACATGCGTTCCCAAAATAAGGGCTGCGGCGTACGGCGCAAATTCAAATAAAGATATTTCCCAGTCTTCCTTGTCACTCTTTACTTTCATCCTCAGCCCCTGCTCCACTCTGGTCTCCGCGATGCTATGCATCGCACCTCATTACGACCTGTTACTGTGAATTGGAGCCTGAAATTGCTCCATAGCTAGTTCGATTTTCGAGGAGCTCTTTGTGCGGCTCTCCGCTCCATGTTCAGAACAAAGATTGGAATCTTGTAGATGTTTCCTTGTGTAATTTTATGGGTAAATTTTCAACCTGAAGAACACAATTGGTTGCTGTGGTCGGTTAACTATTTTTGGCATAATGTGAAGGTTGAAAAGAATAACAGATAAAAGCAATACGTCT…	2417	A	G
isotig03877	TACTGTGCCTTGGTCACATGCGTTCCCAAAATAAGGGCTGCGGCGTACGGCGCAAATTCAAATAAAGATATTTCCCAGTCTTCCTTGTCACTCTTTACTTTCATCCTCAGCCCCTGCTCCACTCTGGTCTCCGCGATGCTATGCATCGCACCTCATTACGACCTGTTACTGTGAATTGGAGCCTGAAATTGCTCCATAGCTAGTTCGATTTTCGAGGAGCTCTTTGTGCGGCTCTCCGCTCCATGTTCAGAACAAAGATTGGAATCTTGTAGATGTTTCCTTGTGTAATTTTATGGGTAAATTTTCAACCTGAAGAACACAATTGGTTGCTGTGGTCGGTTAACTATTTTTGGCATAATGTGAAGGTTGAAAAGAATAACAGATAAAAGCAATACGTCT…	2445	A	C
isotig03877	TACTGTGCCTTGGTCACATGCGTTCCCAAAATAAGGGCTGCGGCGTACGGCGCAAATTCAAATAAAGATATTTCCCAGTCTTCCTTGTCACTCTTTACTTTCATCCTCAGCCCCTGCTCCACTCTGGTCTCCGCGATGCTATGCATCGCACCTCATTACGACCTGTTACTGTGAATTGGAGCCTGAAATTGCTCCATAGCTAGTTCGATTTTCGAGGAGCTCTTTGTGCGGCTCTCCGCTCCATGTTCAGAACAAAGATTGGAATCTTGTAGATGTTTCCTTGTGTAATTTTATGGGTAAATTTTCAACCTGAAGAACACAATTGGTTGCTGTGGTCGGTTAACTATTTTTGGCATAATGTGAAGGTTGAAAAGAATAACAGATAAAAGCAATACGTCT…	2472	G	A
isotig03877	TACTGTGCCTTGGTCACATGCGTTCCCAAAATAAGGGCTGCGGCGTACGGCGCAAATTCAAATAAAGATATTTCCCAGTCTTCCTTGTCACTCTTTACTTTCATCCTCAGCCCCTGCTCCACTCTGGTCTCCGCGATGCTATGCATCGCACCTCATTACGACCTGTTACTGTGAATTGGAGCCTGAAATTGCTCCATAGCTAGTTCGATTTTCGAGGAGCTCTTTGTGCGGCTCTCCGCTCCATGTTCAGAACAAAGATTGGAATCTTGTAGATGTTTCCTTGTGTAATTTTATGGGTAAATTTTCAACCTGAAGAACACAATTGGTTGCTGTGGTCGGTTAACTATTTTTGGCATAATGTGAAGGTTGAAAAGAATAACAGATAAAAGCAATACGTCT…	2556	A	C
isotig03877	TACTGTGCCTTGGTCACATGCGTTCCCAAAATAAGGGCTGCGGCGTACGGCGCAAATTCAAATAAAGATATTTCCCAGTCTTCCTTGTCACTCTTTACTTTCATCCTCAGCCCCTGCTCCACTCTGGTCTCCGCGATGCTATGCATCGCACCTCATTACGACCTGTTACTGTGAATTGGAGCCTGAAATTGCTCCATAGCTAGTTCGATTTTCGAGGAGCTCTTTGTGCGGCTCTCCGCTCCATGTTCAGAACAAAGATTGGAATCTTGTAGATGTTTCCTTGTGTAATTTTATGGGTAAATTTTCAACCTGAAGAACACAATTGGTTGCTGTGGTCGGTTAACTATTTTTGGCATAATGTGAAGGTTGAAAAGAATAACAGATAAAAGCAATACGTCT…	2596	T	G
isotig03877	TACTGTGCCTTGGTCACATGCGTTCCCAAAATAAGGGCTGCGGCGTACGGCGCAAATTCAAATAAAGATATTTCCCAGTCTTCCTTGTCACTCTTTACTTTCATCCTCAGCCCCTGCTCCACTCTGGTCTCCGCGATGCTATGCATCGCACCTCATTACGACCTGTTACTGTGAATTGGAGCCTGAAATTGCTCCATAGCTAGTTCGATTTTCGAGGAGCTCTTTGTGCGGCTCTCCGCTCCATGTTCAGAACAAAGATTGGAATCTTGTAGATGTTTCCTTGTGTAATTTTATGGGTAAATTTTCAACCTGAAGAACACAATTGGTTGCTGTGGTCGGTTAACTATTTTTGGCATAATGTGAAGGTTGAAAAGAATAACAGATAAAAGCAATACGTCT…	2605	G	A
isotig03877	TACTGTGCCTTGGTCACATGCGTTCCCAAAATAAGGGCTGCGGCGTACGGCGCAAATTCAAATAAAGATATTTCCCAGTCTTCCTTGTCACTCTTTACTTTCATCCTCAGCCCCTGCTCCACTCTGGTCTCCGCGATGCTATGCATCGCACCTCATTACGACCTGTTACTGTGAATTGGAGCCTGAAATTGCTCCATAGCTAGTTCGATTTTCGAGGAGCTCTTTGTGCGGCTCTCCGCTCCATGTTCAGAACAAAGATTGGAATCTTGTAGATGTTTCCTTGTGTAATTTTATGGGTAAATTTTCAACCTGAAGAACACAATTGGTTGCTGTGGTCGGTTAACTATTTTTGGCATAATGTGAAGGTTGAAAAGAATAACAGATAAAAGCAATACGTCT…	2684	A	G
isotig03877	TACTGTGCCTTGGTCACATGCGTTCCCAAAATAAGGGCTGCGGCGTACGGCGCAAATTCAAATAAAGATATTTCCCAGTCTTCCTTGTCACTCTTTACTTTCATCCTCAGCCCCTGCTCCACTCTGGTCTCCGCGATGCTATGCATCGCACCTCATTACGACCTGTTACTGTGAATTGGAGCCTGAAATTGCTCCATAGCTAGTTCGATTTTCGAGGAGCTCTTTGTGCGGCTCTCCGCTCCATGTTCAGAACAAAGATTGGAATCTTGTAGATGTTTCCTTGTGTAATTTTATGGGTAAATTTTCAACCTGAAGAACACAATTGGTTGCTGTGGTCGGTTAACTATTTTTGGCATAATGTGAAGGTTGAAAAGAATAACAGATAAAAGCAATACGTCT…	2694	G	C
isotig03877	TACTGTGCCTTGGTCACATGCGTTCCCAAAATAAGGGCTGCGGCGTACGGCGCAAATTCAAATAAAGATATTTCCCAGTCTTCCTTGTCACTCTTTACTTTCATCCTCAGCCCCTGCTCCACTCTGGTCTCCGCGATGCTATGCATCGCACCTCATTACGACCTGTTACTGTGAATTGGAGCCTGAAATTGCTCCATAGCTAGTTCGATTTTCGAGGAGCTCTTTGTGCGGCTCTCCGCTCCATGTTCAGAACAAAGATTGGAATCTTGTAGATGTTTCCTTGTGTAATTTTATGGGTAAATTTTCAACCTGAAGAACACAATTGGTTGCTGTGGTCGGTTAACTATTTTTGGCATAATGTGAAGGTTGAAAAGAATAACAGATAAAAGCAATACGTCT…	2701	C	G
isotig03877	TACTGTGCCTTGGTCACATGCGTTCCCAAAATAAGGGCTGCGGCGTACGGCGCAAATTCAAATAAAGATATTTCCCAGTCTTCCTTGTCACTCTTTACTTTCATCCTCAGCCCCTGCTCCACTCTGGTCTCCGCGATGCTATGCATCGCACCTCATTACGACCTGTTACTGTGAATTGGAGCCTGAAATTGCTCCATAGCTAGTTCGATTTTCGAGGAGCTCTTTGTGCGGCTCTCCGCTCCATGTTCAGAACAAAGATTGGAATCTTGTAGATGTTTCCTTGTGTAATTTTATGGGTAAATTTTCAACCTGAAGAACACAATTGGTTGCTGTGGTCGGTTAACTATTTTTGGCATAATGTGAAGGTTGAAAAGAATAACAGATAAAAGCAATACGTCT…	2723	T	G
isotig03900	GAATAAATTTCACAAACGCGTACCACATCAGTTGCAGGAGGGGCAAGATAGCAGCCCAGCCCTAATTTTGTGAACCCTCGACTCCCATTATTTGTGCACGTTTATTAGGGTTTTGGTGGTCTCTTTTGAGCTAGAATCGGAGGATCGGCTCAGTCCACCCAGGTTTCAGTGAGTATTTACATTATTCACCCTCTCTTATTGCCGAGGGCTTCCTTTCTCGGAGACCACCCATACAATAATAATCGTTTTCACTTTCGAGGCGAATTCAAATCATGTCGGATCGGCTGACTAGGATTGCAATAGTGAGCTCGGATCGCTGCAAGCCCAAGAAATGCAGGCAGGAGTGTAAGAAGAGCTGTCCTGTTGTCAAAACAGGTGGGCTTTGCCATTTATTGTTTT…	464	T	C
isotig03900	GAATAAATTTCACAAACGCGTACCACATCAGTTGCAGGAGGGGCAAGATAGCAGCCCAGCCCTAATTTTGTGAACCCTCGACTCCCATTATTTGTGCACGTTTATTAGGGTTTTGGTGGTCTCTTTTGAGCTAGAATCGGAGGATCGGCTCAGTCCACCCAGGTTTCAGTGAGTATTTACATTATTCACCCTCTCTTATTGCCGAGGGCTTCCTTTCTCGGAGACCACCCATACAATAATAATCGTTTTCACTTTCGAGGCGAATTCAAATCATGTCGGATCGGCTGACTAGGATTGCAATAGTGAGCTCGGATCGCTGCAAGCCCAAGAAATGCAGGCAGGAGTGTAAGAAGAGCTGTCCTGTTGTCAAAACAGGTGGGCTTTGCCATTTATTGTTTT…	696	C	T
isotig03900	GAATAAATTTCACAAACGCGTACCACATCAGTTGCAGGAGGGGCAAGATAGCAGCCCAGCCCTAATTTTGTGAACCCTCGACTCCCATTATTTGTGCACGTTTATTAGGGTTTTGGTGGTCTCTTTTGAGCTAGAATCGGAGGATCGGCTCAGTCCACCCAGGTTTCAGTGAGTATTTACATTATTCACCCTCTCTTATTGCCGAGGGCTTCCTTTCTCGGAGACCACCCATACAATAATAATCGTTTTCACTTTCGAGGCGAATTCAAATCATGTCGGATCGGCTGACTAGGATTGCAATAGTGAGCTCGGATCGCTGCAAGCCCAAGAAATGCAGGCAGGAGTGTAAGAAGAGCTGTCCTGTTGTCAAAACAGGTGGGCTTTGCCATTTATTGTTTT…	781	T	G
isotig03900	GAATAAATTTCACAAACGCGTACCACATCAGTTGCAGGAGGGGCAAGATAGCAGCCCAGCCCTAATTTTGTGAACCCTCGACTCCCATTATTTGTGCACGTTTATTAGGGTTTTGGTGGTCTCTTTTGAGCTAGAATCGGAGGATCGGCTCAGTCCACCCAGGTTTCAGTGAGTATTTACATTATTCACCCTCTCTTATTGCCGAGGGCTTCCTTTCTCGGAGACCACCCATACAATAATAATCGTTTTCACTTTCGAGGCGAATTCAAATCATGTCGGATCGGCTGACTAGGATTGCAATAGTGAGCTCGGATCGCTGCAAGCCCAAGAAATGCAGGCAGGAGTGTAAGAAGAGCTGTCCTGTTGTCAAAACAGGTGGGCTTTGCCATTTATTGTTTT…	796	C	T
isotig03900	GAATAAATTTCACAAACGCGTACCACATCAGTTGCAGGAGGGGCAAGATAGCAGCCCAGCCCTAATTTTGTGAACCCTCGACTCCCATTATTTGTGCACGTTTATTAGGGTTTTGGTGGTCTCTTTTGAGCTAGAATCGGAGGATCGGCTCAGTCCACCCAGGTTTCAGTGAGTATTTACATTATTCACCCTCTCTTATTGCCGAGGGCTTCCTTTCTCGGAGACCACCCATACAATAATAATCGTTTTCACTTTCGAGGCGAATTCAAATCATGTCGGATCGGCTGACTAGGATTGCAATAGTGAGCTCGGATCGCTGCAAGCCCAAGAAATGCAGGCAGGAGTGTAAGAAGAGCTGTCCTGTTGTCAAAACAGGTGGGCTTTGCCATTTATTGTTTT…	931	C	T
isotig03900	GAATAAATTTCACAAACGCGTACCACATCAGTTGCAGGAGGGGCAAGATAGCAGCCCAGCCCTAATTTTGTGAACCCTCGACTCCCATTATTTGTGCACGTTTATTAGGGTTTTGGTGGTCTCTTTTGAGCTAGAATCGGAGGATCGGCTCAGTCCACCCAGGTTTCAGTGAGTATTTACATTATTCACCCTCTCTTATTGCCGAGGGCTTCCTTTCTCGGAGACCACCCATACAATAATAATCGTTTTCACTTTCGAGGCGAATTCAAATCATGTCGGATCGGCTGACTAGGATTGCAATAGTGAGCTCGGATCGCTGCAAGCCCAAGAAATGCAGGCAGGAGTGTAAGAAGAGCTGTCCTGTTGTCAAAACAGGTGGGCTTTGCCATTTATTGTTTT…	1655	C	T
isotig03900	GAATAAATTTCACAAACGCGTACCACATCAGTTGCAGGAGGGGCAAGATAGCAGCCCAGCCCTAATTTTGTGAACCCTCGACTCCCATTATTTGTGCACGTTTATTAGGGTTTTGGTGGTCTCTTTTGAGCTAGAATCGGAGGATCGGCTCAGTCCACCCAGGTTTCAGTGAGTATTTACATTATTCACCCTCTCTTATTGCCGAGGGCTTCCTTTCTCGGAGACCACCCATACAATAATAATCGTTTTCACTTTCGAGGCGAATTCAAATCATGTCGGATCGGCTGACTAGGATTGCAATAGTGAGCTCGGATCGCTGCAAGCCCAAGAAATGCAGGCAGGAGTGTAAGAAGAGCTGTCCTGTTGTCAAAACAGGTGGGCTTTGCCATTTATTGTTTT…	1725	A	C
isotig03900	GAATAAATTTCACAAACGCGTACCACATCAGTTGCAGGAGGGGCAAGATAGCAGCCCAGCCCTAATTTTGTGAACCCTCGACTCCCATTATTTGTGCACGTTTATTAGGGTTTTGGTGGTCTCTTTTGAGCTAGAATCGGAGGATCGGCTCAGTCCACCCAGGTTTCAGTGAGTATTTACATTATTCACCCTCTCTTATTGCCGAGGGCTTCCTTTCTCGGAGACCACCCATACAATAATAATCGTTTTCACTTTCGAGGCGAATTCAAATCATGTCGGATCGGCTGACTAGGATTGCAATAGTGAGCTCGGATCGCTGCAAGCCCAAGAAATGCAGGCAGGAGTGTAAGAAGAGCTGTCCTGTTGTCAAAACAGGTGGGCTTTGCCATTTATTGTTTT…	1835	T	C
isotig03900	GAATAAATTTCACAAACGCGTACCACATCAGTTGCAGGAGGGGCAAGATAGCAGCCCAGCCCTAATTTTGTGAACCCTCGACTCCCATTATTTGTGCACGTTTATTAGGGTTTTGGTGGTCTCTTTTGAGCTAGAATCGGAGGATCGGCTCAGTCCACCCAGGTTTCAGTGAGTATTTACATTATTCACCCTCTCTTATTGCCGAGGGCTTCCTTTCTCGGAGACCACCCATACAATAATAATCGTTTTCACTTTCGAGGCGAATTCAAATCATGTCGGATCGGCTGACTAGGATTGCAATAGTGAGCTCGGATCGCTGCAAGCCCAAGAAATGCAGGCAGGAGTGTAAGAAGAGCTGTCCTGTTGTCAAAACAGGTGGGCTTTGCCATTTATTGTTTT…	2270	T	A
isotig03900	GAATAAATTTCACAAACGCGTACCACATCAGTTGCAGGAGGGGCAAGATAGCAGCCCAGCCCTAATTTTGTGAACCCTCGACTCCCATTATTTGTGCACGTTTATTAGGGTTTTGGTGGTCTCTTTTGAGCTAGAATCGGAGGATCGGCTCAGTCCACCCAGGTTTCAGTGAGTATTTACATTATTCACCCTCTCTTATTGCCGAGGGCTTCCTTTCTCGGAGACCACCCATACAATAATAATCGTTTTCACTTTCGAGGCGAATTCAAATCATGTCGGATCGGCTGACTAGGATTGCAATAGTGAGCTCGGATCGCTGCAAGCCCAAGAAATGCAGGCAGGAGTGTAAGAAGAGCTGTCCTGTTGTCAAAACAGGTGGGCTTTGCCATTTATTGTTTT…	2521	T	C
isotig03932	GAATCCTGTCTGTACCAGTTTTCACAGGTCGATATGGATCAACATTTACTATTGGTCATTAATTTCTCAGCTGGTTTCATTTTCCTATTCATGAGCAATTCCCTGAATCCAATTCTGGCATGAACGAAATTATAGCGGGCTGCAGAAGCTTTCAGATGCCGATTAAGGCTGGGAACAGAGGAATTCAGTAGTTTTTTGAGTTGGGTTTTCGAATTTTTTGTTACAGGATCGATTAATATCTGGGTGTATATTCAGTGTGTATGTAACAGAGAAAAGATCAATGCGTTGTGGAAAGTTATCGGTGGAAGGCGAAGCAGAAGAAATCGCTGTCTCGCCAAAGGCCTGTTCCCGGCAAAGACATGGGAAAAGGTCGAACCCTTATTCTTCGAGAGGGCTTGA…	179	A	G
isotig03932	GAATCCTGTCTGTACCAGTTTTCACAGGTCGATATGGATCAACATTTACTATTGGTCATTAATTTCTCAGCTGGTTTCATTTTCCTATTCATGAGCAATTCCCTGAATCCAATTCTGGCATGAACGAAATTATAGCGGGCTGCAGAAGCTTTCAGATGCCGATTAAGGCTGGGAACAGAGGAATTCAGTAGTTTTTTGAGTTGGGTTTTCGAATTTTTTGTTACAGGATCGATTAATATCTGGGTGTATATTCAGTGTGTATGTAACAGAGAAAAGATCAATGCGTTGTGGAAAGTTATCGGTGGAAGGCGAAGCAGAAGAAATCGCTGTCTCGCCAAAGGCCTGTTCCCGGCAAAGACATGGGAAAAGGTCGAACCCTTATTCTTCGAGAGGGCTTGA…	540	T	C
isotig03932	GAATCCTGTCTGTACCAGTTTTCACAGGTCGATATGGATCAACATTTACTATTGGTCATTAATTTCTCAGCTGGTTTCATTTTCCTATTCATGAGCAATTCCCTGAATCCAATTCTGGCATGAACGAAATTATAGCGGGCTGCAGAAGCTTTCAGATGCCGATTAAGGCTGGGAACAGAGGAATTCAGTAGTTTTTTGAGTTGGGTTTTCGAATTTTTTGTTACAGGATCGATTAATATCTGGGTGTATATTCAGTGTGTATGTAACAGAGAAAAGATCAATGCGTTGTGGAAAGTTATCGGTGGAAGGCGAAGCAGAAGAAATCGCTGTCTCGCCAAAGGCCTGTTCCCGGCAAAGACATGGGAAAAGGTCGAACCCTTATTCTTCGAGAGGGCTTGA…	720	C	A
isotig03932	GAATCCTGTCTGTACCAGTTTTCACAGGTCGATATGGATCAACATTTACTATTGGTCATTAATTTCTCAGCTGGTTTCATTTTCCTATTCATGAGCAATTCCCTGAATCCAATTCTGGCATGAACGAAATTATAGCGGGCTGCAGAAGCTTTCAGATGCCGATTAAGGCTGGGAACAGAGGAATTCAGTAGTTTTTTGAGTTGGGTTTTCGAATTTTTTGTTACAGGATCGATTAATATCTGGGTGTATATTCAGTGTGTATGTAACAGAGAAAAGATCAATGCGTTGTGGAAAGTTATCGGTGGAAGGCGAAGCAGAAGAAATCGCTGTCTCGCCAAAGGCCTGTTCCCGGCAAAGACATGGGAAAAGGTCGAACCCTTATTCTTCGAGAGGGCTTGA…	829	T	A
isotig03932	GAATCCTGTCTGTACCAGTTTTCACAGGTCGATATGGATCAACATTTACTATTGGTCATTAATTTCTCAGCTGGTTTCATTTTCCTATTCATGAGCAATTCCCTGAATCCAATTCTGGCATGAACGAAATTATAGCGGGCTGCAGAAGCTTTCAGATGCCGATTAAGGCTGGGAACAGAGGAATTCAGTAGTTTTTTGAGTTGGGTTTTCGAATTTTTTGTTACAGGATCGATTAATATCTGGGTGTATATTCAGTGTGTATGTAACAGAGAAAAGATCAATGCGTTGTGGAAAGTTATCGGTGGAAGGCGAAGCAGAAGAAATCGCTGTCTCGCCAAAGGCCTGTTCCCGGCAAAGACATGGGAAAAGGTCGAACCCTTATTCTTCGAGAGGGCTTGA…	853	G	A
isotig03932	GAATCCTGTCTGTACCAGTTTTCACAGGTCGATATGGATCAACATTTACTATTGGTCATTAATTTCTCAGCTGGTTTCATTTTCCTATTCATGAGCAATTCCCTGAATCCAATTCTGGCATGAACGAAATTATAGCGGGCTGCAGAAGCTTTCAGATGCCGATTAAGGCTGGGAACAGAGGAATTCAGTAGTTTTTTGAGTTGGGTTTTCGAATTTTTTGTTACAGGATCGATTAATATCTGGGTGTATATTCAGTGTGTATGTAACAGAGAAAAGATCAATGCGTTGTGGAAAGTTATCGGTGGAAGGCGAAGCAGAAGAAATCGCTGTCTCGCCAAAGGCCTGTTCCCGGCAAAGACATGGGAAAAGGTCGAACCCTTATTCTTCGAGAGGGCTTGA…	1178	C	T
isotig03932	GAATCCTGTCTGTACCAGTTTTCACAGGTCGATATGGATCAACATTTACTATTGGTCATTAATTTCTCAGCTGGTTTCATTTTCCTATTCATGAGCAATTCCCTGAATCCAATTCTGGCATGAACGAAATTATAGCGGGCTGCAGAAGCTTTCAGATGCCGATTAAGGCTGGGAACAGAGGAATTCAGTAGTTTTTTGAGTTGGGTTTTCGAATTTTTTGTTACAGGATCGATTAATATCTGGGTGTATATTCAGTGTGTATGTAACAGAGAAAAGATCAATGCGTTGTGGAAAGTTATCGGTGGAAGGCGAAGCAGAAGAAATCGCTGTCTCGCCAAAGGCCTGTTCCCGGCAAAGACATGGGAAAAGGTCGAACCCTTATTCTTCGAGAGGGCTTGA…	1240	C	T
isotig03932	GAATCCTGTCTGTACCAGTTTTCACAGGTCGATATGGATCAACATTTACTATTGGTCATTAATTTCTCAGCTGGTTTCATTTTCCTATTCATGAGCAATTCCCTGAATCCAATTCTGGCATGAACGAAATTATAGCGGGCTGCAGAAGCTTTCAGATGCCGATTAAGGCTGGGAACAGAGGAATTCAGTAGTTTTTTGAGTTGGGTTTTCGAATTTTTTGTTACAGGATCGATTAATATCTGGGTGTATATTCAGTGTGTATGTAACAGAGAAAAGATCAATGCGTTGTGGAAAGTTATCGGTGGAAGGCGAAGCAGAAGAAATCGCTGTCTCGCCAAAGGCCTGTTCCCGGCAAAGACATGGGAAAAGGTCGAACCCTTATTCTTCGAGAGGGCTTGA…	1241	T	C
isotig03932	GAATCCTGTCTGTACCAGTTTTCACAGGTCGATATGGATCAACATTTACTATTGGTCATTAATTTCTCAGCTGGTTTCATTTTCCTATTCATGAGCAATTCCCTGAATCCAATTCTGGCATGAACGAAATTATAGCGGGCTGCAGAAGCTTTCAGATGCCGATTAAGGCTGGGAACAGAGGAATTCAGTAGTTTTTTGAGTTGGGTTTTCGAATTTTTTGTTACAGGATCGATTAATATCTGGGTGTATATTCAGTGTGTATGTAACAGAGAAAAGATCAATGCGTTGTGGAAAGTTATCGGTGGAAGGCGAAGCAGAAGAAATCGCTGTCTCGCCAAAGGCCTGTTCCCGGCAAAGACATGGGAAAAGGTCGAACCCTTATTCTTCGAGAGGGCTTGA…	1414	G	A
isotig03932	GAATCCTGTCTGTACCAGTTTTCACAGGTCGATATGGATCAACATTTACTATTGGTCATTAATTTCTCAGCTGGTTTCATTTTCCTATTCATGAGCAATTCCCTGAATCCAATTCTGGCATGAACGAAATTATAGCGGGCTGCAGAAGCTTTCAGATGCCGATTAAGGCTGGGAACAGAGGAATTCAGTAGTTTTTTGAGTTGGGTTTTCGAATTTTTTGTTACAGGATCGATTAATATCTGGGTGTATATTCAGTGTGTATGTAACAGAGAAAAGATCAATGCGTTGTGGAAAGTTATCGGTGGAAGGCGAAGCAGAAGAAATCGCTGTCTCGCCAAAGGCCTGTTCCCGGCAAAGACATGGGAAAAGGTCGAACCCTTATTCTTCGAGAGGGCTTGA…	1417	A	G
isotig03932	GAATCCTGTCTGTACCAGTTTTCACAGGTCGATATGGATCAACATTTACTATTGGTCATTAATTTCTCAGCTGGTTTCATTTTCCTATTCATGAGCAATTCCCTGAATCCAATTCTGGCATGAACGAAATTATAGCGGGCTGCAGAAGCTTTCAGATGCCGATTAAGGCTGGGAACAGAGGAATTCAGTAGTTTTTTGAGTTGGGTTTTCGAATTTTTTGTTACAGGATCGATTAATATCTGGGTGTATATTCAGTGTGTATGTAACAGAGAAAAGATCAATGCGTTGTGGAAAGTTATCGGTGGAAGGCGAAGCAGAAGAAATCGCTGTCTCGCCAAAGGCCTGTTCCCGGCAAAGACATGGGAAAAGGTCGAACCCTTATTCTTCGAGAGGGCTTGA…	1440	A	G
isotig03932	GAATCCTGTCTGTACCAGTTTTCACAGGTCGATATGGATCAACATTTACTATTGGTCATTAATTTCTCAGCTGGTTTCATTTTCCTATTCATGAGCAATTCCCTGAATCCAATTCTGGCATGAACGAAATTATAGCGGGCTGCAGAAGCTTTCAGATGCCGATTAAGGCTGGGAACAGAGGAATTCAGTAGTTTTTTGAGTTGGGTTTTCGAATTTTTTGTTACAGGATCGATTAATATCTGGGTGTATATTCAGTGTGTATGTAACAGAGAAAAGATCAATGCGTTGTGGAAAGTTATCGGTGGAAGGCGAAGCAGAAGAAATCGCTGTCTCGCCAAAGGCCTGTTCCCGGCAAAGACATGGGAAAAGGTCGAACCCTTATTCTTCGAGAGGGCTTGA…	1449	G	A
isotig03932	GAATCCTGTCTGTACCAGTTTTCACAGGTCGATATGGATCAACATTTACTATTGGTCATTAATTTCTCAGCTGGTTTCATTTTCCTATTCATGAGCAATTCCCTGAATCCAATTCTGGCATGAACGAAATTATAGCGGGCTGCAGAAGCTTTCAGATGCCGATTAAGGCTGGGAACAGAGGAATTCAGTAGTTTTTTGAGTTGGGTTTTCGAATTTTTTGTTACAGGATCGATTAATATCTGGGTGTATATTCAGTGTGTATGTAACAGAGAAAAGATCAATGCGTTGTGGAAAGTTATCGGTGGAAGGCGAAGCAGAAGAAATCGCTGTCTCGCCAAAGGCCTGTTCCCGGCAAAGACATGGGAAAAGGTCGAACCCTTATTCTTCGAGAGGGCTTGA…	1460	G	C
isotig03932	GAATCCTGTCTGTACCAGTTTTCACAGGTCGATATGGATCAACATTTACTATTGGTCATTAATTTCTCAGCTGGTTTCATTTTCCTATTCATGAGCAATTCCCTGAATCCAATTCTGGCATGAACGAAATTATAGCGGGCTGCAGAAGCTTTCAGATGCCGATTAAGGCTGGGAACAGAGGAATTCAGTAGTTTTTTGAGTTGGGTTTTCGAATTTTTTGTTACAGGATCGATTAATATCTGGGTGTATATTCAGTGTGTATGTAACAGAGAAAAGATCAATGCGTTGTGGAAAGTTATCGGTGGAAGGCGAAGCAGAAGAAATCGCTGTCTCGCCAAAGGCCTGTTCCCGGCAAAGACATGGGAAAAGGTCGAACCCTTATTCTTCGAGAGGGCTTGA…	1468	A	T
isotig03932	GAATCCTGTCTGTACCAGTTTTCACAGGTCGATATGGATCAACATTTACTATTGGTCATTAATTTCTCAGCTGGTTTCATTTTCCTATTCATGAGCAATTCCCTGAATCCAATTCTGGCATGAACGAAATTATAGCGGGCTGCAGAAGCTTTCAGATGCCGATTAAGGCTGGGAACAGAGGAATTCAGTAGTTTTTTGAGTTGGGTTTTCGAATTTTTTGTTACAGGATCGATTAATATCTGGGTGTATATTCAGTGTGTATGTAACAGAGAAAAGATCAATGCGTTGTGGAAAGTTATCGGTGGAAGGCGAAGCAGAAGAAATCGCTGTCTCGCCAAAGGCCTGTTCCCGGCAAAGACATGGGAAAAGGTCGAACCCTTATTCTTCGAGAGGGCTTGA…	1477	T	G
isotig03932	GAATCCTGTCTGTACCAGTTTTCACAGGTCGATATGGATCAACATTTACTATTGGTCATTAATTTCTCAGCTGGTTTCATTTTCCTATTCATGAGCAATTCCCTGAATCCAATTCTGGCATGAACGAAATTATAGCGGGCTGCAGAAGCTTTCAGATGCCGATTAAGGCTGGGAACAGAGGAATTCAGTAGTTTTTTGAGTTGGGTTTTCGAATTTTTTGTTACAGGATCGATTAATATCTGGGTGTATATTCAGTGTGTATGTAACAGAGAAAAGATCAATGCGTTGTGGAAAGTTATCGGTGGAAGGCGAAGCAGAAGAAATCGCTGTCTCGCCAAAGGCCTGTTCCCGGCAAAGACATGGGAAAAGGTCGAACCCTTATTCTTCGAGAGGGCTTGA…	1481	T	C
isotig03932	GAATCCTGTCTGTACCAGTTTTCACAGGTCGATATGGATCAACATTTACTATTGGTCATTAATTTCTCAGCTGGTTTCATTTTCCTATTCATGAGCAATTCCCTGAATCCAATTCTGGCATGAACGAAATTATAGCGGGCTGCAGAAGCTTTCAGATGCCGATTAAGGCTGGGAACAGAGGAATTCAGTAGTTTTTTGAGTTGGGTTTTCGAATTTTTTGTTACAGGATCGATTAATATCTGGGTGTATATTCAGTGTGTATGTAACAGAGAAAAGATCAATGCGTTGTGGAAAGTTATCGGTGGAAGGCGAAGCAGAAGAAATCGCTGTCTCGCCAAAGGCCTGTTCCCGGCAAAGACATGGGAAAAGGTCGAACCCTTATTCTTCGAGAGGGCTTGA…	1658	G	A
isotig03932	GAATCCTGTCTGTACCAGTTTTCACAGGTCGATATGGATCAACATTTACTATTGGTCATTAATTTCTCAGCTGGTTTCATTTTCCTATTCATGAGCAATTCCCTGAATCCAATTCTGGCATGAACGAAATTATAGCGGGCTGCAGAAGCTTTCAGATGCCGATTAAGGCTGGGAACAGAGGAATTCAGTAGTTTTTTGAGTTGGGTTTTCGAATTTTTTGTTACAGGATCGATTAATATCTGGGTGTATATTCAGTGTGTATGTAACAGAGAAAAGATCAATGCGTTGTGGAAAGTTATCGGTGGAAGGCGAAGCAGAAGAAATCGCTGTCTCGCCAAAGGCCTGTTCCCGGCAAAGACATGGGAAAAGGTCGAACCCTTATTCTTCGAGAGGGCTTGA…	1665	T	C
isotig03932	GAATCCTGTCTGTACCAGTTTTCACAGGTCGATATGGATCAACATTTACTATTGGTCATTAATTTCTCAGCTGGTTTCATTTTCCTATTCATGAGCAATTCCCTGAATCCAATTCTGGCATGAACGAAATTATAGCGGGCTGCAGAAGCTTTCAGATGCCGATTAAGGCTGGGAACAGAGGAATTCAGTAGTTTTTTGAGTTGGGTTTTCGAATTTTTTGTTACAGGATCGATTAATATCTGGGTGTATATTCAGTGTGTATGTAACAGAGAAAAGATCAATGCGTTGTGGAAAGTTATCGGTGGAAGGCGAAGCAGAAGAAATCGCTGTCTCGCCAAAGGCCTGTTCCCGGCAAAGACATGGGAAAAGGTCGAACCCTTATTCTTCGAGAGGGCTTGA…	1677	G	A
isotig03932	GAATCCTGTCTGTACCAGTTTTCACAGGTCGATATGGATCAACATTTACTATTGGTCATTAATTTCTCAGCTGGTTTCATTTTCCTATTCATGAGCAATTCCCTGAATCCAATTCTGGCATGAACGAAATTATAGCGGGCTGCAGAAGCTTTCAGATGCCGATTAAGGCTGGGAACAGAGGAATTCAGTAGTTTTTTGAGTTGGGTTTTCGAATTTTTTGTTACAGGATCGATTAATATCTGGGTGTATATTCAGTGTGTATGTAACAGAGAAAAGATCAATGCGTTGTGGAAAGTTATCGGTGGAAGGCGAAGCAGAAGAAATCGCTGTCTCGCCAAAGGCCTGTTCCCGGCAAAGACATGGGAAAAGGTCGAACCCTTATTCTTCGAGAGGGCTTGA…	1886	A	T
isotig03932	GAATCCTGTCTGTACCAGTTTTCACAGGTCGATATGGATCAACATTTACTATTGGTCATTAATTTCTCAGCTGGTTTCATTTTCCTATTCATGAGCAATTCCCTGAATCCAATTCTGGCATGAACGAAATTATAGCGGGCTGCAGAAGCTTTCAGATGCCGATTAAGGCTGGGAACAGAGGAATTCAGTAGTTTTTTGAGTTGGGTTTTCGAATTTTTTGTTACAGGATCGATTAATATCTGGGTGTATATTCAGTGTGTATGTAACAGAGAAAAGATCAATGCGTTGTGGAAAGTTATCGGTGGAAGGCGAAGCAGAAGAAATCGCTGTCTCGCCAAAGGCCTGTTCCCGGCAAAGACATGGGAAAAGGTCGAACCCTTATTCTTCGAGAGGGCTTGA…	1916	C	T
isotig03932	GAATCCTGTCTGTACCAGTTTTCACAGGTCGATATGGATCAACATTTACTATTGGTCATTAATTTCTCAGCTGGTTTCATTTTCCTATTCATGAGCAATTCCCTGAATCCAATTCTGGCATGAACGAAATTATAGCGGGCTGCAGAAGCTTTCAGATGCCGATTAAGGCTGGGAACAGAGGAATTCAGTAGTTTTTTGAGTTGGGTTTTCGAATTTTTTGTTACAGGATCGATTAATATCTGGGTGTATATTCAGTGTGTATGTAACAGAGAAAAGATCAATGCGTTGTGGAAAGTTATCGGTGGAAGGCGAAGCAGAAGAAATCGCTGTCTCGCCAAAGGCCTGTTCCCGGCAAAGACATGGGAAAAGGTCGAACCCTTATTCTTCGAGAGGGCTTGA…	2912	T	G
isotig03932	GAATCCTGTCTGTACCAGTTTTCACAGGTCGATATGGATCAACATTTACTATTGGTCATTAATTTCTCAGCTGGTTTCATTTTCCTATTCATGAGCAATTCCCTGAATCCAATTCTGGCATGAACGAAATTATAGCGGGCTGCAGAAGCTTTCAGATGCCGATTAAGGCTGGGAACAGAGGAATTCAGTAGTTTTTTGAGTTGGGTTTTCGAATTTTTTGTTACAGGATCGATTAATATCTGGGTGTATATTCAGTGTGTATGTAACAGAGAAAAGATCAATGCGTTGTGGAAAGTTATCGGTGGAAGGCGAAGCAGAAGAAATCGCTGTCTCGCCAAAGGCCTGTTCCCGGCAAAGACATGGGAAAAGGTCGAACCCTTATTCTTCGAGAGGGCTTGA…	2986	G	T
isotig03942	GTCAAAGTGAATAAATATAGTTTAAAATTTGAATCGAATCGAATGACATATTTTTTAACATGTGTGAAGAATCGATTGAAAAAAATTGTCCAACGAAGCTCTATCTCTATCTCTCTATCAGTGGTATCTGTGCCCATCCACGAATTCTTTATAACTCAAATTATATGTTCTGTGGTTCTTATTTCCAGAAATAAGAGAAAATATCAGTGGAACTTTTACATCAATAAAATATGCTACAGTGCGATTTTTTTTTAATAAACAGGTTGTAAGAAAGATCCGTGAACTATTTTTGTGGAAGGCAAAAGAGACTTAACTCTAGAATGAGCCGAATCCAAAAGAAGGTGGGGGCTTAAAATCAGGTGGAGGCTTAAAAGGTGAGGAGCGCGGAGCAATGGTGAT…	123	G	C
isotig03942	GTCAAAGTGAATAAATATAGTTTAAAATTTGAATCGAATCGAATGACATATTTTTTAACATGTGTGAAGAATCGATTGAAAAAAATTGTCCAACGAAGCTCTATCTCTATCTCTCTATCAGTGGTATCTGTGCCCATCCACGAATTCTTTATAACTCAAATTATATGTTCTGTGGTTCTTATTTCCAGAAATAAGAGAAAATATCAGTGGAACTTTTACATCAATAAAATATGCTACAGTGCGATTTTTTTTTAATAAACAGGTTGTAAGAAAGATCCGTGAACTATTTTTGTGGAAGGCAAAAGAGACTTAACTCTAGAATGAGCCGAATCCAAAAGAAGGTGGGGGCTTAAAATCAGGTGGAGGCTTAAAAGGTGAGGAGCGCGGAGCAATGGTGAT…	150	T	C
isotig03942	GTCAAAGTGAATAAATATAGTTTAAAATTTGAATCGAATCGAATGACATATTTTTTAACATGTGTGAAGAATCGATTGAAAAAAATTGTCCAACGAAGCTCTATCTCTATCTCTCTATCAGTGGTATCTGTGCCCATCCACGAATTCTTTATAACTCAAATTATATGTTCTGTGGTTCTTATTTCCAGAAATAAGAGAAAATATCAGTGGAACTTTTACATCAATAAAATATGCTACAGTGCGATTTTTTTTTAATAAACAGGTTGTAAGAAAGATCCGTGAACTATTTTTGTGGAAGGCAAAAGAGACTTAACTCTAGAATGAGCCGAATCCAAAAGAAGGTGGGGGCTTAAAATCAGGTGGAGGCTTAAAAGGTGAGGAGCGCGGAGCAATGGTGAT…	256	T	C
isotig03942	GTCAAAGTGAATAAATATAGTTTAAAATTTGAATCGAATCGAATGACATATTTTTTAACATGTGTGAAGAATCGATTGAAAAAAATTGTCCAACGAAGCTCTATCTCTATCTCTCTATCAGTGGTATCTGTGCCCATCCACGAATTCTTTATAACTCAAATTATATGTTCTGTGGTTCTTATTTCCAGAAATAAGAGAAAATATCAGTGGAACTTTTACATCAATAAAATATGCTACAGTGCGATTTTTTTTTAATAAACAGGTTGTAAGAAAGATCCGTGAACTATTTTTGTGGAAGGCAAAAGAGACTTAACTCTAGAATGAGCCGAATCCAAAAGAAGGTGGGGGCTTAAAATCAGGTGGAGGCTTAAAAGGTGAGGAGCGCGGAGCAATGGTGAT…	277	C	A
isotig03942	GTCAAAGTGAATAAATATAGTTTAAAATTTGAATCGAATCGAATGACATATTTTTTAACATGTGTGAAGAATCGATTGAAAAAAATTGTCCAACGAAGCTCTATCTCTATCTCTCTATCAGTGGTATCTGTGCCCATCCACGAATTCTTTATAACTCAAATTATATGTTCTGTGGTTCTTATTTCCAGAAATAAGAGAAAATATCAGTGGAACTTTTACATCAATAAAATATGCTACAGTGCGATTTTTTTTTAATAAACAGGTTGTAAGAAAGATCCGTGAACTATTTTTGTGGAAGGCAAAAGAGACTTAACTCTAGAATGAGCCGAATCCAAAAGAAGGTGGGGGCTTAAAATCAGGTGGAGGCTTAAAAGGTGAGGAGCGCGGAGCAATGGTGAT…	438	G	C
isotig03942	GTCAAAGTGAATAAATATAGTTTAAAATTTGAATCGAATCGAATGACATATTTTTTAACATGTGTGAAGAATCGATTGAAAAAAATTGTCCAACGAAGCTCTATCTCTATCTCTCTATCAGTGGTATCTGTGCCCATCCACGAATTCTTTATAACTCAAATTATATGTTCTGTGGTTCTTATTTCCAGAAATAAGAGAAAATATCAGTGGAACTTTTACATCAATAAAATATGCTACAGTGCGATTTTTTTTTAATAAACAGGTTGTAAGAAAGATCCGTGAACTATTTTTGTGGAAGGCAAAAGAGACTTAACTCTAGAATGAGCCGAATCCAAAAGAAGGTGGGGGCTTAAAATCAGGTGGAGGCTTAAAAGGTGAGGAGCGCGGAGCAATGGTGAT…	655	C	T
isotig03942	GTCAAAGTGAATAAATATAGTTTAAAATTTGAATCGAATCGAATGACATATTTTTTAACATGTGTGAAGAATCGATTGAAAAAAATTGTCCAACGAAGCTCTATCTCTATCTCTCTATCAGTGGTATCTGTGCCCATCCACGAATTCTTTATAACTCAAATTATATGTTCTGTGGTTCTTATTTCCAGAAATAAGAGAAAATATCAGTGGAACTTTTACATCAATAAAATATGCTACAGTGCGATTTTTTTTTAATAAACAGGTTGTAAGAAAGATCCGTGAACTATTTTTGTGGAAGGCAAAAGAGACTTAACTCTAGAATGAGCCGAATCCAAAAGAAGGTGGGGGCTTAAAATCAGGTGGAGGCTTAAAAGGTGAGGAGCGCGGAGCAATGGTGAT…	716	C	G
isotig03942	GTCAAAGTGAATAAATATAGTTTAAAATTTGAATCGAATCGAATGACATATTTTTTAACATGTGTGAAGAATCGATTGAAAAAAATTGTCCAACGAAGCTCTATCTCTATCTCTCTATCAGTGGTATCTGTGCCCATCCACGAATTCTTTATAACTCAAATTATATGTTCTGTGGTTCTTATTTCCAGAAATAAGAGAAAATATCAGTGGAACTTTTACATCAATAAAATATGCTACAGTGCGATTTTTTTTTAATAAACAGGTTGTAAGAAAGATCCGTGAACTATTTTTGTGGAAGGCAAAAGAGACTTAACTCTAGAATGAGCCGAATCCAAAAGAAGGTGGGGGCTTAAAATCAGGTGGAGGCTTAAAAGGTGAGGAGCGCGGAGCAATGGTGAT…	755	G	A
isotig03942	GTCAAAGTGAATAAATATAGTTTAAAATTTGAATCGAATCGAATGACATATTTTTTAACATGTGTGAAGAATCGATTGAAAAAAATTGTCCAACGAAGCTCTATCTCTATCTCTCTATCAGTGGTATCTGTGCCCATCCACGAATTCTTTATAACTCAAATTATATGTTCTGTGGTTCTTATTTCCAGAAATAAGAGAAAATATCAGTGGAACTTTTACATCAATAAAATATGCTACAGTGCGATTTTTTTTTAATAAACAGGTTGTAAGAAAGATCCGTGAACTATTTTTGTGGAAGGCAAAAGAGACTTAACTCTAGAATGAGCCGAATCCAAAAGAAGGTGGGGGCTTAAAATCAGGTGGAGGCTTAAAAGGTGAGGAGCGCGGAGCAATGGTGAT…	771	T	A
isotig03942	GTCAAAGTGAATAAATATAGTTTAAAATTTGAATCGAATCGAATGACATATTTTTTAACATGTGTGAAGAATCGATTGAAAAAAATTGTCCAACGAAGCTCTATCTCTATCTCTCTATCAGTGGTATCTGTGCCCATCCACGAATTCTTTATAACTCAAATTATATGTTCTGTGGTTCTTATTTCCAGAAATAAGAGAAAATATCAGTGGAACTTTTACATCAATAAAATATGCTACAGTGCGATTTTTTTTTAATAAACAGGTTGTAAGAAAGATCCGTGAACTATTTTTGTGGAAGGCAAAAGAGACTTAACTCTAGAATGAGCCGAATCCAAAAGAAGGTGGGGGCTTAAAATCAGGTGGAGGCTTAAAAGGTGAGGAGCGCGGAGCAATGGTGAT…	779	C	G
isotig03942	GTCAAAGTGAATAAATATAGTTTAAAATTTGAATCGAATCGAATGACATATTTTTTAACATGTGTGAAGAATCGATTGAAAAAAATTGTCCAACGAAGCTCTATCTCTATCTCTCTATCAGTGGTATCTGTGCCCATCCACGAATTCTTTATAACTCAAATTATATGTTCTGTGGTTCTTATTTCCAGAAATAAGAGAAAATATCAGTGGAACTTTTACATCAATAAAATATGCTACAGTGCGATTTTTTTTTAATAAACAGGTTGTAAGAAAGATCCGTGAACTATTTTTGTGGAAGGCAAAAGAGACTTAACTCTAGAATGAGCCGAATCCAAAAGAAGGTGGGGGCTTAAAATCAGGTGGAGGCTTAAAAGGTGAGGAGCGCGGAGCAATGGTGAT…	809	G	A
isotig03942	GTCAAAGTGAATAAATATAGTTTAAAATTTGAATCGAATCGAATGACATATTTTTTAACATGTGTGAAGAATCGATTGAAAAAAATTGTCCAACGAAGCTCTATCTCTATCTCTCTATCAGTGGTATCTGTGCCCATCCACGAATTCTTTATAACTCAAATTATATGTTCTGTGGTTCTTATTTCCAGAAATAAGAGAAAATATCAGTGGAACTTTTACATCAATAAAATATGCTACAGTGCGATTTTTTTTTAATAAACAGGTTGTAAGAAAGATCCGTGAACTATTTTTGTGGAAGGCAAAAGAGACTTAACTCTAGAATGAGCCGAATCCAAAAGAAGGTGGGGGCTTAAAATCAGGTGGAGGCTTAAAAGGTGAGGAGCGCGGAGCAATGGTGAT…	824	A	C
isotig03942	GTCAAAGTGAATAAATATAGTTTAAAATTTGAATCGAATCGAATGACATATTTTTTAACATGTGTGAAGAATCGATTGAAAAAAATTGTCCAACGAAGCTCTATCTCTATCTCTCTATCAGTGGTATCTGTGCCCATCCACGAATTCTTTATAACTCAAATTATATGTTCTGTGGTTCTTATTTCCAGAAATAAGAGAAAATATCAGTGGAACTTTTACATCAATAAAATATGCTACAGTGCGATTTTTTTTTAATAAACAGGTTGTAAGAAAGATCCGTGAACTATTTTTGTGGAAGGCAAAAGAGACTTAACTCTAGAATGAGCCGAATCCAAAAGAAGGTGGGGGCTTAAAATCAGGTGGAGGCTTAAAAGGTGAGGAGCGCGGAGCAATGGTGAT…	1155	C	A
isotig03942	GTCAAAGTGAATAAATATAGTTTAAAATTTGAATCGAATCGAATGACATATTTTTTAACATGTGTGAAGAATCGATTGAAAAAAATTGTCCAACGAAGCTCTATCTCTATCTCTCTATCAGTGGTATCTGTGCCCATCCACGAATTCTTTATAACTCAAATTATATGTTCTGTGGTTCTTATTTCCAGAAATAAGAGAAAATATCAGTGGAACTTTTACATCAATAAAATATGCTACAGTGCGATTTTTTTTTAATAAACAGGTTGTAAGAAAGATCCGTGAACTATTTTTGTGGAAGGCAAAAGAGACTTAACTCTAGAATGAGCCGAATCCAAAAGAAGGTGGGGGCTTAAAATCAGGTGGAGGCTTAAAAGGTGAGGAGCGCGGAGCAATGGTGAT…	1182	G	T
isotig03942	GTCAAAGTGAATAAATATAGTTTAAAATTTGAATCGAATCGAATGACATATTTTTTAACATGTGTGAAGAATCGATTGAAAAAAATTGTCCAACGAAGCTCTATCTCTATCTCTCTATCAGTGGTATCTGTGCCCATCCACGAATTCTTTATAACTCAAATTATATGTTCTGTGGTTCTTATTTCCAGAAATAAGAGAAAATATCAGTGGAACTTTTACATCAATAAAATATGCTACAGTGCGATTTTTTTTTAATAAACAGGTTGTAAGAAAGATCCGTGAACTATTTTTGTGGAAGGCAAAAGAGACTTAACTCTAGAATGAGCCGAATCCAAAAGAAGGTGGGGGCTTAAAATCAGGTGGAGGCTTAAAAGGTGAGGAGCGCGGAGCAATGGTGAT…	1208	A	C
isotig04038	GTTAGAACAGCAGAATTTGCTTTACAATTAAAAAATTGAGATTTTATCGTTGTAGAAACAATTCCAAGATGCCACAAAATAGGCATATCAGGAACACAATCAAAATAAATTCAACACAAGAAACAATCCCCTTGCATGAGATAATTTCCAATTGAACAAAAGGCTCTCTAGCAATAATGTCACTATTAAAAAATCTAGATAGACTTCAATACCACAACATGATTTTAGAACATTGAATGTCAGGCTTAAAGTCTAAAACCATGACCCGAGCTATTCCAATAGAAAAACAAATTCTATTGTTCAAACCAGCAATTTACCAGCACTTACATTTCTCAATTCCTCAATATTTGCATCAAAATCAATTAGTTTGGTAGAAATTAAGTAAAAATAACCTATGTT…	78	A	G
isotig04038	GTTAGAACAGCAGAATTTGCTTTACAATTAAAAAATTGAGATTTTATCGTTGTAGAAACAATTCCAAGATGCCACAAAATAGGCATATCAGGAACACAATCAAAATAAATTCAACACAAGAAACAATCCCCTTGCATGAGATAATTTCCAATTGAACAAAAGGCTCTCTAGCAATAATGTCACTATTAAAAAATCTAGATAGACTTCAATACCACAACATGATTTTAGAACATTGAATGTCAGGCTTAAAGTCTAAAACCATGACCCGAGCTATTCCAATAGAAAAACAAATTCTATTGTTCAAACCAGCAATTTACCAGCACTTACATTTCTCAATTCCTCAATATTTGCATCAAAATCAATTAGTTTGGTAGAAATTAAGTAAAAATAACCTATGTT…	306	C	A
isotig04038	GTTAGAACAGCAGAATTTGCTTTACAATTAAAAAATTGAGATTTTATCGTTGTAGAAACAATTCCAAGATGCCACAAAATAGGCATATCAGGAACACAATCAAAATAAATTCAACACAAGAAACAATCCCCTTGCATGAGATAATTTCCAATTGAACAAAAGGCTCTCTAGCAATAATGTCACTATTAAAAAATCTAGATAGACTTCAATACCACAACATGATTTTAGAACATTGAATGTCAGGCTTAAAGTCTAAAACCATGACCCGAGCTATTCCAATAGAAAAACAAATTCTATTGTTCAAACCAGCAATTTACCAGCACTTACATTTCTCAATTCCTCAATATTTGCATCAAAATCAATTAGTTTGGTAGAAATTAAGTAAAAATAACCTATGTT…	314	T	A
isotig04038	GTTAGAACAGCAGAATTTGCTTTACAATTAAAAAATTGAGATTTTATCGTTGTAGAAACAATTCCAAGATGCCACAAAATAGGCATATCAGGAACACAATCAAAATAAATTCAACACAAGAAACAATCCCCTTGCATGAGATAATTTCCAATTGAACAAAAGGCTCTCTAGCAATAATGTCACTATTAAAAAATCTAGATAGACTTCAATACCACAACATGATTTTAGAACATTGAATGTCAGGCTTAAAGTCTAAAACCATGACCCGAGCTATTCCAATAGAAAAACAAATTCTATTGTTCAAACCAGCAATTTACCAGCACTTACATTTCTCAATTCCTCAATATTTGCATCAAAATCAATTAGTTTGGTAGAAATTAAGTAAAAATAACCTATGTT…	648	T	A
isotig04038	GTTAGAACAGCAGAATTTGCTTTACAATTAAAAAATTGAGATTTTATCGTTGTAGAAACAATTCCAAGATGCCACAAAATAGGCATATCAGGAACACAATCAAAATAAATTCAACACAAGAAACAATCCCCTTGCATGAGATAATTTCCAATTGAACAAAAGGCTCTCTAGCAATAATGTCACTATTAAAAAATCTAGATAGACTTCAATACCACAACATGATTTTAGAACATTGAATGTCAGGCTTAAAGTCTAAAACCATGACCCGAGCTATTCCAATAGAAAAACAAATTCTATTGTTCAAACCAGCAATTTACCAGCACTTACATTTCTCAATTCCTCAATATTTGCATCAAAATCAATTAGTTTGGTAGAAATTAAGTAAAAATAACCTATGTT…	720	G	A
isotig04038	GTTAGAACAGCAGAATTTGCTTTACAATTAAAAAATTGAGATTTTATCGTTGTAGAAACAATTCCAAGATGCCACAAAATAGGCATATCAGGAACACAATCAAAATAAATTCAACACAAGAAACAATCCCCTTGCATGAGATAATTTCCAATTGAACAAAAGGCTCTCTAGCAATAATGTCACTATTAAAAAATCTAGATAGACTTCAATACCACAACATGATTTTAGAACATTGAATGTCAGGCTTAAAGTCTAAAACCATGACCCGAGCTATTCCAATAGAAAAACAAATTCTATTGTTCAAACCAGCAATTTACCAGCACTTACATTTCTCAATTCCTCAATATTTGCATCAAAATCAATTAGTTTGGTAGAAATTAAGTAAAAATAACCTATGTT…	822	T	C
isotig04038	GTTAGAACAGCAGAATTTGCTTTACAATTAAAAAATTGAGATTTTATCGTTGTAGAAACAATTCCAAGATGCCACAAAATAGGCATATCAGGAACACAATCAAAATAAATTCAACACAAGAAACAATCCCCTTGCATGAGATAATTTCCAATTGAACAAAAGGCTCTCTAGCAATAATGTCACTATTAAAAAATCTAGATAGACTTCAATACCACAACATGATTTTAGAACATTGAATGTCAGGCTTAAAGTCTAAAACCATGACCCGAGCTATTCCAATAGAAAAACAAATTCTATTGTTCAAACCAGCAATTTACCAGCACTTACATTTCTCAATTCCTCAATATTTGCATCAAAATCAATTAGTTTGGTAGAAATTAAGTAAAAATAACCTATGTT…	834	C	T
isotig04038	GTTAGAACAGCAGAATTTGCTTTACAATTAAAAAATTGAGATTTTATCGTTGTAGAAACAATTCCAAGATGCCACAAAATAGGCATATCAGGAACACAATCAAAATAAATTCAACACAAGAAACAATCCCCTTGCATGAGATAATTTCCAATTGAACAAAAGGCTCTCTAGCAATAATGTCACTATTAAAAAATCTAGATAGACTTCAATACCACAACATGATTTTAGAACATTGAATGTCAGGCTTAAAGTCTAAAACCATGACCCGAGCTATTCCAATAGAAAAACAAATTCTATTGTTCAAACCAGCAATTTACCAGCACTTACATTTCTCAATTCCTCAATATTTGCATCAAAATCAATTAGTTTGGTAGAAATTAAGTAAAAATAACCTATGTT…	837	T	A
isotig04038	GTTAGAACAGCAGAATTTGCTTTACAATTAAAAAATTGAGATTTTATCGTTGTAGAAACAATTCCAAGATGCCACAAAATAGGCATATCAGGAACACAATCAAAATAAATTCAACACAAGAAACAATCCCCTTGCATGAGATAATTTCCAATTGAACAAAAGGCTCTCTAGCAATAATGTCACTATTAAAAAATCTAGATAGACTTCAATACCACAACATGATTTTAGAACATTGAATGTCAGGCTTAAAGTCTAAAACCATGACCCGAGCTATTCCAATAGAAAAACAAATTCTATTGTTCAAACCAGCAATTTACCAGCACTTACATTTCTCAATTCCTCAATATTTGCATCAAAATCAATTAGTTTGGTAGAAATTAAGTAAAAATAACCTATGTT…	1118	T	G
isotig04038	GTTAGAACAGCAGAATTTGCTTTACAATTAAAAAATTGAGATTTTATCGTTGTAGAAACAATTCCAAGATGCCACAAAATAGGCATATCAGGAACACAATCAAAATAAATTCAACACAAGAAACAATCCCCTTGCATGAGATAATTTCCAATTGAACAAAAGGCTCTCTAGCAATAATGTCACTATTAAAAAATCTAGATAGACTTCAATACCACAACATGATTTTAGAACATTGAATGTCAGGCTTAAAGTCTAAAACCATGACCCGAGCTATTCCAATAGAAAAACAAATTCTATTGTTCAAACCAGCAATTTACCAGCACTTACATTTCTCAATTCCTCAATATTTGCATCAAAATCAATTAGTTTGGTAGAAATTAAGTAAAAATAACCTATGTT…	1162	A	G
isotig04038	GTTAGAACAGCAGAATTTGCTTTACAATTAAAAAATTGAGATTTTATCGTTGTAGAAACAATTCCAAGATGCCACAAAATAGGCATATCAGGAACACAATCAAAATAAATTCAACACAAGAAACAATCCCCTTGCATGAGATAATTTCCAATTGAACAAAAGGCTCTCTAGCAATAATGTCACTATTAAAAAATCTAGATAGACTTCAATACCACAACATGATTTTAGAACATTGAATGTCAGGCTTAAAGTCTAAAACCATGACCCGAGCTATTCCAATAGAAAAACAAATTCTATTGTTCAAACCAGCAATTTACCAGCACTTACATTTCTCAATTCCTCAATATTTGCATCAAAATCAATTAGTTTGGTAGAAATTAAGTAAAAATAACCTATGTT…	1183	T	C
isotig04038	GTTAGAACAGCAGAATTTGCTTTACAATTAAAAAATTGAGATTTTATCGTTGTAGAAACAATTCCAAGATGCCACAAAATAGGCATATCAGGAACACAATCAAAATAAATTCAACACAAGAAACAATCCCCTTGCATGAGATAATTTCCAATTGAACAAAAGGCTCTCTAGCAATAATGTCACTATTAAAAAATCTAGATAGACTTCAATACCACAACATGATTTTAGAACATTGAATGTCAGGCTTAAAGTCTAAAACCATGACCCGAGCTATTCCAATAGAAAAACAAATTCTATTGTTCAAACCAGCAATTTACCAGCACTTACATTTCTCAATTCCTCAATATTTGCATCAAAATCAATTAGTTTGGTAGAAATTAAGTAAAAATAACCTATGTT…	1184	G	A
isotig04038	GTTAGAACAGCAGAATTTGCTTTACAATTAAAAAATTGAGATTTTATCGTTGTAGAAACAATTCCAAGATGCCACAAAATAGGCATATCAGGAACACAATCAAAATAAATTCAACACAAGAAACAATCCCCTTGCATGAGATAATTTCCAATTGAACAAAAGGCTCTCTAGCAATAATGTCACTATTAAAAAATCTAGATAGACTTCAATACCACAACATGATTTTAGAACATTGAATGTCAGGCTTAAAGTCTAAAACCATGACCCGAGCTATTCCAATAGAAAAACAAATTCTATTGTTCAAACCAGCAATTTACCAGCACTTACATTTCTCAATTCCTCAATATTTGCATCAAAATCAATTAGTTTGGTAGAAATTAAGTAAAAATAACCTATGTT…	1191	A	G
isotig04038	GTTAGAACAGCAGAATTTGCTTTACAATTAAAAAATTGAGATTTTATCGTTGTAGAAACAATTCCAAGATGCCACAAAATAGGCATATCAGGAACACAATCAAAATAAATTCAACACAAGAAACAATCCCCTTGCATGAGATAATTTCCAATTGAACAAAAGGCTCTCTAGCAATAATGTCACTATTAAAAAATCTAGATAGACTTCAATACCACAACATGATTTTAGAACATTGAATGTCAGGCTTAAAGTCTAAAACCATGACCCGAGCTATTCCAATAGAAAAACAAATTCTATTGTTCAAACCAGCAATTTACCAGCACTTACATTTCTCAATTCCTCAATATTTGCATCAAAATCAATTAGTTTGGTAGAAATTAAGTAAAAATAACCTATGTT…	1277	G	A
isotig04038	GTTAGAACAGCAGAATTTGCTTTACAATTAAAAAATTGAGATTTTATCGTTGTAGAAACAATTCCAAGATGCCACAAAATAGGCATATCAGGAACACAATCAAAATAAATTCAACACAAGAAACAATCCCCTTGCATGAGATAATTTCCAATTGAACAAAAGGCTCTCTAGCAATAATGTCACTATTAAAAAATCTAGATAGACTTCAATACCACAACATGATTTTAGAACATTGAATGTCAGGCTTAAAGTCTAAAACCATGACCCGAGCTATTCCAATAGAAAAACAAATTCTATTGTTCAAACCAGCAATTTACCAGCACTTACATTTCTCAATTCCTCAATATTTGCATCAAAATCAATTAGTTTGGTAGAAATTAAGTAAAAATAACCTATGTT…	1281	G	A
isotig04038	GTTAGAACAGCAGAATTTGCTTTACAATTAAAAAATTGAGATTTTATCGTTGTAGAAACAATTCCAAGATGCCACAAAATAGGCATATCAGGAACACAATCAAAATAAATTCAACACAAGAAACAATCCCCTTGCATGAGATAATTTCCAATTGAACAAAAGGCTCTCTAGCAATAATGTCACTATTAAAAAATCTAGATAGACTTCAATACCACAACATGATTTTAGAACATTGAATGTCAGGCTTAAAGTCTAAAACCATGACCCGAGCTATTCCAATAGAAAAACAAATTCTATTGTTCAAACCAGCAATTTACCAGCACTTACATTTCTCAATTCCTCAATATTTGCATCAAAATCAATTAGTTTGGTAGAAATTAAGTAAAAATAACCTATGTT…	1285	G	C
isotig04038	GTTAGAACAGCAGAATTTGCTTTACAATTAAAAAATTGAGATTTTATCGTTGTAGAAACAATTCCAAGATGCCACAAAATAGGCATATCAGGAACACAATCAAAATAAATTCAACACAAGAAACAATCCCCTTGCATGAGATAATTTCCAATTGAACAAAAGGCTCTCTAGCAATAATGTCACTATTAAAAAATCTAGATAGACTTCAATACCACAACATGATTTTAGAACATTGAATGTCAGGCTTAAAGTCTAAAACCATGACCCGAGCTATTCCAATAGAAAAACAAATTCTATTGTTCAAACCAGCAATTTACCAGCACTTACATTTCTCAATTCCTCAATATTTGCATCAAAATCAATTAGTTTGGTAGAAATTAAGTAAAAATAACCTATGTT…	1291	A	C
isotig04038	GTTAGAACAGCAGAATTTGCTTTACAATTAAAAAATTGAGATTTTATCGTTGTAGAAACAATTCCAAGATGCCACAAAATAGGCATATCAGGAACACAATCAAAATAAATTCAACACAAGAAACAATCCCCTTGCATGAGATAATTTCCAATTGAACAAAAGGCTCTCTAGCAATAATGTCACTATTAAAAAATCTAGATAGACTTCAATACCACAACATGATTTTAGAACATTGAATGTCAGGCTTAAAGTCTAAAACCATGACCCGAGCTATTCCAATAGAAAAACAAATTCTATTGTTCAAACCAGCAATTTACCAGCACTTACATTTCTCAATTCCTCAATATTTGCATCAAAATCAATTAGTTTGGTAGAAATTAAGTAAAAATAACCTATGTT…	1323	T	C
isotig04038	GTTAGAACAGCAGAATTTGCTTTACAATTAAAAAATTGAGATTTTATCGTTGTAGAAACAATTCCAAGATGCCACAAAATAGGCATATCAGGAACACAATCAAAATAAATTCAACACAAGAAACAATCCCCTTGCATGAGATAATTTCCAATTGAACAAAAGGCTCTCTAGCAATAATGTCACTATTAAAAAATCTAGATAGACTTCAATACCACAACATGATTTTAGAACATTGAATGTCAGGCTTAAAGTCTAAAACCATGACCCGAGCTATTCCAATAGAAAAACAAATTCTATTGTTCAAACCAGCAATTTACCAGCACTTACATTTCTCAATTCCTCAATATTTGCATCAAAATCAATTAGTTTGGTAGAAATTAAGTAAAAATAACCTATGTT…	1325	T	G
isotig04038	GTTAGAACAGCAGAATTTGCTTTACAATTAAAAAATTGAGATTTTATCGTTGTAGAAACAATTCCAAGATGCCACAAAATAGGCATATCAGGAACACAATCAAAATAAATTCAACACAAGAAACAATCCCCTTGCATGAGATAATTTCCAATTGAACAAAAGGCTCTCTAGCAATAATGTCACTATTAAAAAATCTAGATAGACTTCAATACCACAACATGATTTTAGAACATTGAATGTCAGGCTTAAAGTCTAAAACCATGACCCGAGCTATTCCAATAGAAAAACAAATTCTATTGTTCAAACCAGCAATTTACCAGCACTTACATTTCTCAATTCCTCAATATTTGCATCAAAATCAATTAGTTTGGTAGAAATTAAGTAAAAATAACCTATGTT…	1332	G	C
isotig04072	GAAAAGCCAGTGGCGCGAAGCTACCGTGTGTCGGATTATGACTGAACGCCTCTAAGTCAGAATCCACGCTAGAAGCGGTGCATGTCACTCTTCGACTGTATCTCGACCCGCAGTAGGGGCGTCGCTTTGTCGCCCCCAGGGGCCCGTGTCATTTGCAAACCGCGACCGTGAAGCATCTCGGTCGGGGCAGCTTTGAAGTTCAATTCCAAATGGTCGTTGAGAAGAATCCTTTGCAGACGACTTAAATACGCGACGGGGTATTGTAAGTGGCAGAGTGGCCTTGCTGCCACGATCCACTGAGATTCAGCCCTTGGTCGCCTCGATTCAGGGCGGTTTACACAATTGGCGGCGGCCACATCTTGGTTTTCTTGGCTTTTTATTTCCATAACAGCAGAGGGA…	509	G	C
isotig04072	GAAAAGCCAGTGGCGCGAAGCTACCGTGTGTCGGATTATGACTGAACGCCTCTAAGTCAGAATCCACGCTAGAAGCGGTGCATGTCACTCTTCGACTGTATCTCGACCCGCAGTAGGGGCGTCGCTTTGTCGCCCCCAGGGGCCCGTGTCATTTGCAAACCGCGACCGTGAAGCATCTCGGTCGGGGCAGCTTTGAAGTTCAATTCCAAATGGTCGTTGAGAAGAATCCTTTGCAGACGACTTAAATACGCGACGGGGTATTGTAAGTGGCAGAGTGGCCTTGCTGCCACGATCCACTGAGATTCAGCCCTTGGTCGCCTCGATTCAGGGCGGTTTACACAATTGGCGGCGGCCACATCTTGGTTTTCTTGGCTTTTTATTTCCATAACAGCAGAGGGA…	525	C	G
isotig04072	GAAAAGCCAGTGGCGCGAAGCTACCGTGTGTCGGATTATGACTGAACGCCTCTAAGTCAGAATCCACGCTAGAAGCGGTGCATGTCACTCTTCGACTGTATCTCGACCCGCAGTAGGGGCGTCGCTTTGTCGCCCCCAGGGGCCCGTGTCATTTGCAAACCGCGACCGTGAAGCATCTCGGTCGGGGCAGCTTTGAAGTTCAATTCCAAATGGTCGTTGAGAAGAATCCTTTGCAGACGACTTAAATACGCGACGGGGTATTGTAAGTGGCAGAGTGGCCTTGCTGCCACGATCCACTGAGATTCAGCCCTTGGTCGCCTCGATTCAGGGCGGTTTACACAATTGGCGGCGGCCACATCTTGGTTTTCTTGGCTTTTTATTTCCATAACAGCAGAGGGA…	552	G	T
isotig04072	GAAAAGCCAGTGGCGCGAAGCTACCGTGTGTCGGATTATGACTGAACGCCTCTAAGTCAGAATCCACGCTAGAAGCGGTGCATGTCACTCTTCGACTGTATCTCGACCCGCAGTAGGGGCGTCGCTTTGTCGCCCCCAGGGGCCCGTGTCATTTGCAAACCGCGACCGTGAAGCATCTCGGTCGGGGCAGCTTTGAAGTTCAATTCCAAATGGTCGTTGAGAAGAATCCTTTGCAGACGACTTAAATACGCGACGGGGTATTGTAAGTGGCAGAGTGGCCTTGCTGCCACGATCCACTGAGATTCAGCCCTTGGTCGCCTCGATTCAGGGCGGTTTACACAATTGGCGGCGGCCACATCTTGGTTTTCTTGGCTTTTTATTTCCATAACAGCAGAGGGA…	565	T	C
isotig04072	GAAAAGCCAGTGGCGCGAAGCTACCGTGTGTCGGATTATGACTGAACGCCTCTAAGTCAGAATCCACGCTAGAAGCGGTGCATGTCACTCTTCGACTGTATCTCGACCCGCAGTAGGGGCGTCGCTTTGTCGCCCCCAGGGGCCCGTGTCATTTGCAAACCGCGACCGTGAAGCATCTCGGTCGGGGCAGCTTTGAAGTTCAATTCCAAATGGTCGTTGAGAAGAATCCTTTGCAGACGACTTAAATACGCGACGGGGTATTGTAAGTGGCAGAGTGGCCTTGCTGCCACGATCCACTGAGATTCAGCCCTTGGTCGCCTCGATTCAGGGCGGTTTACACAATTGGCGGCGGCCACATCTTGGTTTTCTTGGCTTTTTATTTCCATAACAGCAGAGGGA…	599	G	A
isotig04072	GAAAAGCCAGTGGCGCGAAGCTACCGTGTGTCGGATTATGACTGAACGCCTCTAAGTCAGAATCCACGCTAGAAGCGGTGCATGTCACTCTTCGACTGTATCTCGACCCGCAGTAGGGGCGTCGCTTTGTCGCCCCCAGGGGCCCGTGTCATTTGCAAACCGCGACCGTGAAGCATCTCGGTCGGGGCAGCTTTGAAGTTCAATTCCAAATGGTCGTTGAGAAGAATCCTTTGCAGACGACTTAAATACGCGACGGGGTATTGTAAGTGGCAGAGTGGCCTTGCTGCCACGATCCACTGAGATTCAGCCCTTGGTCGCCTCGATTCAGGGCGGTTTACACAATTGGCGGCGGCCACATCTTGGTTTTCTTGGCTTTTTATTTCCATAACAGCAGAGGGA…	677	A	T
isotig04072	GAAAAGCCAGTGGCGCGAAGCTACCGTGTGTCGGATTATGACTGAACGCCTCTAAGTCAGAATCCACGCTAGAAGCGGTGCATGTCACTCTTCGACTGTATCTCGACCCGCAGTAGGGGCGTCGCTTTGTCGCCCCCAGGGGCCCGTGTCATTTGCAAACCGCGACCGTGAAGCATCTCGGTCGGGGCAGCTTTGAAGTTCAATTCCAAATGGTCGTTGAGAAGAATCCTTTGCAGACGACTTAAATACGCGACGGGGTATTGTAAGTGGCAGAGTGGCCTTGCTGCCACGATCCACTGAGATTCAGCCCTTGGTCGCCTCGATTCAGGGCGGTTTACACAATTGGCGGCGGCCACATCTTGGTTTTCTTGGCTTTTTATTTCCATAACAGCAGAGGGA…	1202	A	G
isotig04072	GAAAAGCCAGTGGCGCGAAGCTACCGTGTGTCGGATTATGACTGAACGCCTCTAAGTCAGAATCCACGCTAGAAGCGGTGCATGTCACTCTTCGACTGTATCTCGACCCGCAGTAGGGGCGTCGCTTTGTCGCCCCCAGGGGCCCGTGTCATTTGCAAACCGCGACCGTGAAGCATCTCGGTCGGGGCAGCTTTGAAGTTCAATTCCAAATGGTCGTTGAGAAGAATCCTTTGCAGACGACTTAAATACGCGACGGGGTATTGTAAGTGGCAGAGTGGCCTTGCTGCCACGATCCACTGAGATTCAGCCCTTGGTCGCCTCGATTCAGGGCGGTTTACACAATTGGCGGCGGCCACATCTTGGTTTTCTTGGCTTTTTATTTCCATAACAGCAGAGGGA…	1503	A	G
isotig04072	GAAAAGCCAGTGGCGCGAAGCTACCGTGTGTCGGATTATGACTGAACGCCTCTAAGTCAGAATCCACGCTAGAAGCGGTGCATGTCACTCTTCGACTGTATCTCGACCCGCAGTAGGGGCGTCGCTTTGTCGCCCCCAGGGGCCCGTGTCATTTGCAAACCGCGACCGTGAAGCATCTCGGTCGGGGCAGCTTTGAAGTTCAATTCCAAATGGTCGTTGAGAAGAATCCTTTGCAGACGACTTAAATACGCGACGGGGTATTGTAAGTGGCAGAGTGGCCTTGCTGCCACGATCCACTGAGATTCAGCCCTTGGTCGCCTCGATTCAGGGCGGTTTACACAATTGGCGGCGGCCACATCTTGGTTTTCTTGGCTTTTTATTTCCATAACAGCAGAGGGA…	1542	G	C
isotig04072	GAAAAGCCAGTGGCGCGAAGCTACCGTGTGTCGGATTATGACTGAACGCCTCTAAGTCAGAATCCACGCTAGAAGCGGTGCATGTCACTCTTCGACTGTATCTCGACCCGCAGTAGGGGCGTCGCTTTGTCGCCCCCAGGGGCCCGTGTCATTTGCAAACCGCGACCGTGAAGCATCTCGGTCGGGGCAGCTTTGAAGTTCAATTCCAAATGGTCGTTGAGAAGAATCCTTTGCAGACGACTTAAATACGCGACGGGGTATTGTAAGTGGCAGAGTGGCCTTGCTGCCACGATCCACTGAGATTCAGCCCTTGGTCGCCTCGATTCAGGGCGGTTTACACAATTGGCGGCGGCCACATCTTGGTTTTCTTGGCTTTTTATTTCCATAACAGCAGAGGGA…	1589	G	T
isotig04072	GAAAAGCCAGTGGCGCGAAGCTACCGTGTGTCGGATTATGACTGAACGCCTCTAAGTCAGAATCCACGCTAGAAGCGGTGCATGTCACTCTTCGACTGTATCTCGACCCGCAGTAGGGGCGTCGCTTTGTCGCCCCCAGGGGCCCGTGTCATTTGCAAACCGCGACCGTGAAGCATCTCGGTCGGGGCAGCTTTGAAGTTCAATTCCAAATGGTCGTTGAGAAGAATCCTTTGCAGACGACTTAAATACGCGACGGGGTATTGTAAGTGGCAGAGTGGCCTTGCTGCCACGATCCACTGAGATTCAGCCCTTGGTCGCCTCGATTCAGGGCGGTTTACACAATTGGCGGCGGCCACATCTTGGTTTTCTTGGCTTTTTATTTCCATAACAGCAGAGGGA…	1637	T	C
isotig04112	CAAATCAACCTAAAATTTTTGTTGTCAATATCTAGTACAATTACTCAAGATTCGGAGTGTAGTAGAGCATTTACAAAATATACACATGAAAATTTGAGCATGTATTAAACTCATGCTCAGTTATAAATTATAATGCATGGCAATAGAACAAATTAAACTCAACCACTATAATGCAATAATCCCACATATTACTCAAACTCTATCTAGGGAGTGAAATTTTTTTTTTTTTGAGCTCAGGGTTTCTTCATGGAGACGAAGCTCCACACAAGACAAGGAACAGTCTGTTTGATCCTTATACATTAGCTCACAGAATTTTAAGGGTACTACATCCACTTTCAACTGGAGGTAATAACTTCCGGAAAAGGTGTGGACTGCCAACACCAATATTATGAAATTGAA…	322	T	C
isotig04112	CAAATCAACCTAAAATTTTTGTTGTCAATATCTAGTACAATTACTCAAGATTCGGAGTGTAGTAGAGCATTTACAAAATATACACATGAAAATTTGAGCATGTATTAAACTCATGCTCAGTTATAAATTATAATGCATGGCAATAGAACAAATTAAACTCAACCACTATAATGCAATAATCCCACATATTACTCAAACTCTATCTAGGGAGTGAAATTTTTTTTTTTTTGAGCTCAGGGTTTCTTCATGGAGACGAAGCTCCACACAAGACAAGGAACAGTCTGTTTGATCCTTATACATTAGCTCACAGAATTTTAAGGGTACTACATCCACTTTCAACTGGAGGTAATAACTTCCGGAAAAGGTGTGGACTGCCAACACCAATATTATGAAATTGAA…	1606	G	A
isotig04112	CAAATCAACCTAAAATTTTTGTTGTCAATATCTAGTACAATTACTCAAGATTCGGAGTGTAGTAGAGCATTTACAAAATATACACATGAAAATTTGAGCATGTATTAAACTCATGCTCAGTTATAAATTATAATGCATGGCAATAGAACAAATTAAACTCAACCACTATAATGCAATAATCCCACATATTACTCAAACTCTATCTAGGGAGTGAAATTTTTTTTTTTTTGAGCTCAGGGTTTCTTCATGGAGACGAAGCTCCACACAAGACAAGGAACAGTCTGTTTGATCCTTATACATTAGCTCACAGAATTTTAAGGGTACTACATCCACTTTCAACTGGAGGTAATAACTTCCGGAAAAGGTGTGGACTGCCAACACCAATATTATGAAATTGAA…	1841	C	T
isotig04112	CAAATCAACCTAAAATTTTTGTTGTCAATATCTAGTACAATTACTCAAGATTCGGAGTGTAGTAGAGCATTTACAAAATATACACATGAAAATTTGAGCATGTATTAAACTCATGCTCAGTTATAAATTATAATGCATGGCAATAGAACAAATTAAACTCAACCACTATAATGCAATAATCCCACATATTACTCAAACTCTATCTAGGGAGTGAAATTTTTTTTTTTTTGAGCTCAGGGTTTCTTCATGGAGACGAAGCTCCACACAAGACAAGGAACAGTCTGTTTGATCCTTATACATTAGCTCACAGAATTTTAAGGGTACTACATCCACTTTCAACTGGAGGTAATAACTTCCGGAAAAGGTGTGGACTGCCAACACCAATATTATGAAATTGAA…	1946	T	C
isotig04190	AGGAGTCCATCAATATGATCAGTTTAAATAAGCTAAATGCGATAAAAAACTATTCAAAATTGTTATAGTTTCCAATATACAACCAAAAGCATCTCACATTCAATTTTAATTCCATGAAAACTAAACATGTGTCACGGCATGCCAAGTTCGCATTCGCACCCAAAGACATTATACACCAGTATATGATCTCATTTAAAAACTAGAGAGAACCCTCACCTCACAAACCATGTAACCACATTAGAATTATCTTTTAAAGTTACCAATGCACCGAGAACATGACTTATTGTGTTAAATAGACCATTTTCTCTGAACGTTATATAAAGGTTTTATCCTTGACATAACTATGCAGCGTCTTAAATCACTTAGAATTATCTTTTAAAGTTACCATTGATCTGAGAA…	1331	C	G
isotig04217	GGTAGTAAGGACCGCCGGGGCCTTATTTGGCCCCTACGCCATGCTTCCTACGAAGAGATACTAACGAATCTACATCCGCACCATCCTCTTTGAAACGATTGGGAACGGATTTTGCGAGAAATCACGAGTCGAACAATAACACAAGACAAGACAAACGATAGGTGGTTGTATAACGCTCCCCACTTTACAGTTTACCAGGAGCTCAAAAGATAGCCAGGCATGCATAAACCCCCTTAATGACTCAAGGGACTTAAGAGGGTTCCTTCCATGTGCCCCCTTTCTAAAGGAGGGTGCGGGCATGGAGAGGGCCGAGCGGCTGGACTTCGATGGCGTTAAAGGCGTGAGGAAGCCACGGACATTTTCGGTAAGGAAGCCCAGATCGGGAGGATCCCATGCAAC…	503	T	C
isotig04217	GGTAGTAAGGACCGCCGGGGCCTTATTTGGCCCCTACGCCATGCTTCCTACGAAGAGATACTAACGAATCTACATCCGCACCATCCTCTTTGAAACGATTGGGAACGGATTTTGCGAGAAATCACGAGTCGAACAATAACACAAGACAAGACAAACGATAGGTGGTTGTATAACGCTCCCCACTTTACAGTTTACCAGGAGCTCAAAAGATAGCCAGGCATGCATAAACCCCCTTAATGACTCAAGGGACTTAAGAGGGTTCCTTCCATGTGCCCCCTTTCTAAAGGAGGGTGCGGGCATGGAGAGGGCCGAGCGGCTGGACTTCGATGGCGTTAAAGGCGTGAGGAAGCCACGGACATTTTCGGTAAGGAAGCCCAGATCGGGAGGATCCCATGCAAC…	939	C	T
isotig04217	GGTAGTAAGGACCGCCGGGGCCTTATTTGGCCCCTACGCCATGCTTCCTACGAAGAGATACTAACGAATCTACATCCGCACCATCCTCTTTGAAACGATTGGGAACGGATTTTGCGAGAAATCACGAGTCGAACAATAACACAAGACAAGACAAACGATAGGTGGTTGTATAACGCTCCCCACTTTACAGTTTACCAGGAGCTCAAAAGATAGCCAGGCATGCATAAACCCCCTTAATGACTCAAGGGACTTAAGAGGGTTCCTTCCATGTGCCCCCTTTCTAAAGGAGGGTGCGGGCATGGAGAGGGCCGAGCGGCTGGACTTCGATGGCGTTAAAGGCGTGAGGAAGCCACGGACATTTTCGGTAAGGAAGCCCAGATCGGGAGGATCCCATGCAAC…	1757	C	A
isotig04217	GGTAGTAAGGACCGCCGGGGCCTTATTTGGCCCCTACGCCATGCTTCCTACGAAGAGATACTAACGAATCTACATCCGCACCATCCTCTTTGAAACGATTGGGAACGGATTTTGCGAGAAATCACGAGTCGAACAATAACACAAGACAAGACAAACGATAGGTGGTTGTATAACGCTCCCCACTTTACAGTTTACCAGGAGCTCAAAAGATAGCCAGGCATGCATAAACCCCCTTAATGACTCAAGGGACTTAAGAGGGTTCCTTCCATGTGCCCCCTTTCTAAAGGAGGGTGCGGGCATGGAGAGGGCCGAGCGGCTGGACTTCGATGGCGTTAAAGGCGTGAGGAAGCCACGGACATTTTCGGTAAGGAAGCCCAGATCGGGAGGATCCCATGCAAC…	1875	G	T
isotig04231	CTATACTTTTTAGTTTTAAAGGGATTTTAGGCGGTGTTTCGCTAAGTAGTTTTCGTGCCCGGTCCCATGCAAGGTTGGGACTCTTGGTAGTGGGATGCCTATATAGTAGTCGGGGCAATTAGCAATAGCATATCCGAGATAGAAGAGGCAGACTCATAAAATTCGAAATACATTTTCAGTGCAATGGCTACCGAGGGAGAAAAGGGGCAAGTAAAGCTGTTGGGTGCGACTCTGAGTCCCTTCGTGGTGCGGGTTTGCATAGCCCTGGCTCTTAAAGGTATCGATTACGAGTTCATCCAAGAGAGTATGCATCCTAAGAGCGAGCTGCTGGTGAAATCAAACCCTGTTCACAAGAAGATTCCAGTGCTTATCCACAATGGAAAGCCTGTTTGTGAATCC…	189	T	A
isotig04231	CTATACTTTTTAGTTTTAAAGGGATTTTAGGCGGTGTTTCGCTAAGTAGTTTTCGTGCCCGGTCCCATGCAAGGTTGGGACTCTTGGTAGTGGGATGCCTATATAGTAGTCGGGGCAATTAGCAATAGCATATCCGAGATAGAAGAGGCAGACTCATAAAATTCGAAATACATTTTCAGTGCAATGGCTACCGAGGGAGAAAAGGGGCAAGTAAAGCTGTTGGGTGCGACTCTGAGTCCCTTCGTGGTGCGGGTTTGCATAGCCCTGGCTCTTAAAGGTATCGATTACGAGTTCATCCAAGAGAGTATGCATCCTAAGAGCGAGCTGCTGGTGAAATCAAACCCTGTTCACAAGAAGATTCCAGTGCTTATCCACAATGGAAAGCCTGTTTGTGAATCC…	229	A	G
[truncated: 185,581 more rows]

## Sheet: Supplementary Table S4
Supplementary Table S4. Details and functional annotation of the SNPs with an Fst ≥ 0.80.
Transcript	Pos	SNP	SNP effect	Fst	blastx annotation	GO annotation	KEGG annotation
isotig67703	386	GA	3_prime_UTR	1	pentatricopeptide repeat-containing protein At2g27610 [Quercus suber]	zinc ion binding
[truncated: 30 more rows]

## Sheet: Supplementary Table S5
Supplementary Table S5. Allele frequencies and Hardy-Weinberg Equilibrium significance values calculated by SNPassoc. SNPs with minor allele frequencie ≤ 0.05 (5%) and Hardy-Weinberg Equilibrium with p ≤ 0.001 (***) were excluded from further analysis.
[truncated: 22 more rows]

[truncated: 1 more sheets: Supplemantary Table S6]
